# Supplementary material for: Understanding the influence of metal centers on the mechanism and chemoselectivity of transition-metal-catalyzed cyclizations of dienyl aldehydes
Source: Royal Society of Chemistry journal article supplement (doi:10.1039/d4qo02342k), 2025-01-01
Supplement: d4qo02342k1.pdf [file d4qo02342k1.pdf]

*Supporting Information*

**Understanding the influence of metal centers on the mechanism and chemoselectivity of transition-metal-catalyzed cyclizations of dienyl aldehydes**

Jian-Biao Liu\*, Yan Wang, Hai-Yan Wang, Xiao-Jun Liu\*

*E-mail: xiaojunliu@sdu.edu.cn, jianbiaoliu.thu@sdu.edu.cn*

**Table of Contents**

|                                                                                                                  |     |
|------------------------------------------------------------------------------------------------------------------|-----|
| 1. Detailed free energy profiles and additional results for Co(I) and ( <i>S,S</i> )-BDPP ligand ( $L_1$ ).....  | S2  |
| 2. Comparison of three competitive pathways in the presence of ( <i>S,S</i> )-BDPP ligand ( $L_1$ ).....         | S4  |
| 3. Detailed free energy profiles for Co(0) and ( <i>S,S</i> )-BDPP ligand ( $L_1$ ) .....                        | S4  |
| 4. The solvent effect on the chemoselectivity of the cyclization reactions of dienyl aldehydes.....              | S5  |
| 5. Detailed free energy profiles and additional results for Rh(I) and ( <i>S,S</i> )-BDPP ligand ( $L_1$ ).....  | S6  |
| 6. Detailed free energy profiles and additional results for Rh and ( <i>R</i> )-MeO-BIPHEP ligand ( $L_2$ )..... | S7  |
| 7. Electrostatic potential (ESP) surfaces and the surface areas for $3_S$ and $3_{L1Rh}$ .....                   | S8  |
| 8. ETS-NOCV analysis for the cobaltacycle intermediate $3_S$ and rhodacycle intermediate $3_{L1Rh}$ .....        | S8  |
| 9. Results of the minimum energy crossing points.....                                                            | S9  |
| 10. Calculated energies and imaginary frequencies .....                                                          | S11 |
| 11. Cartesian coordinates of all optimized structures.....                                                       | S16 |

# 1. Detailed free energy profiles and additional results for Co(I) and (S,S)-BDPP ligand (L<sub>1</sub>)

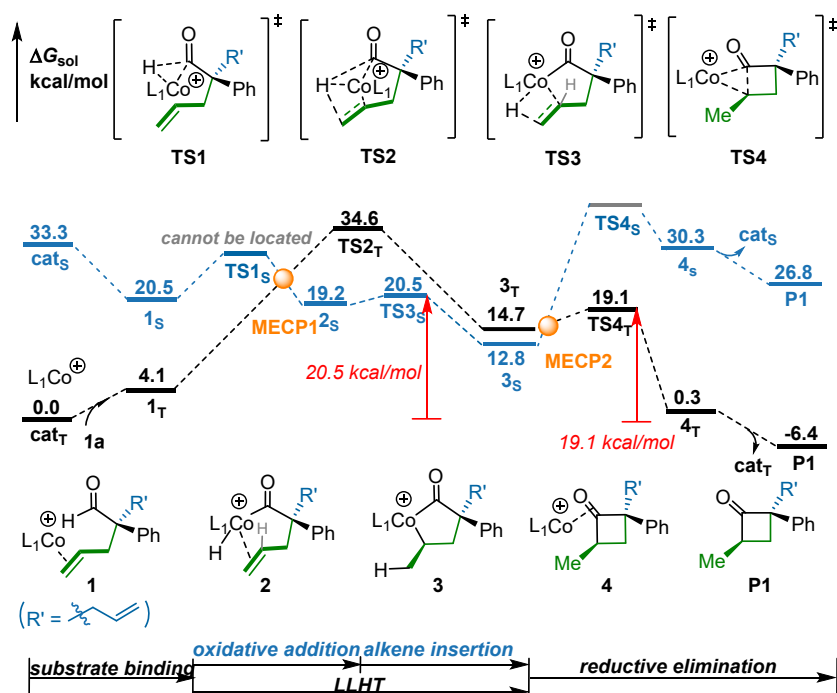

**Fig. S1.** Free energy profile for the formation of **P1** in the presence of Co(I) and (S,S)-BDPP ligand at the level of SMD(Acetonitrile)/B3LYP-D3(BJ)/def2-TZVPP//SMD(Acetonitrile)/B3LYP-D3(BJ)/def2-SVP. S and T refer to the singlet and triplet states, respectively.

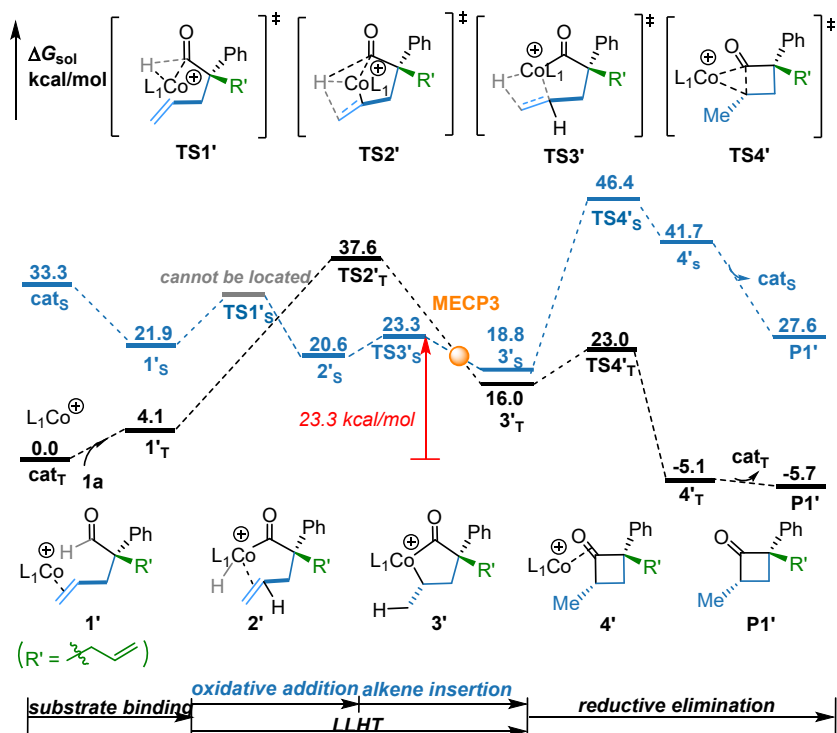

**Fig. S2.** Free energy profiles for the formation of **P1'** in the presence of Co(I) and (S,S)-BDPP ligand at the level of SMD(Acetonitrile)/B3LYP-D3(BJ)/def2-TZVPP//SMD(Acetonitrile)/B3LYP-D3(BJ)/def2-SVP. S and T refer to the singlet and triplet states, respectively.

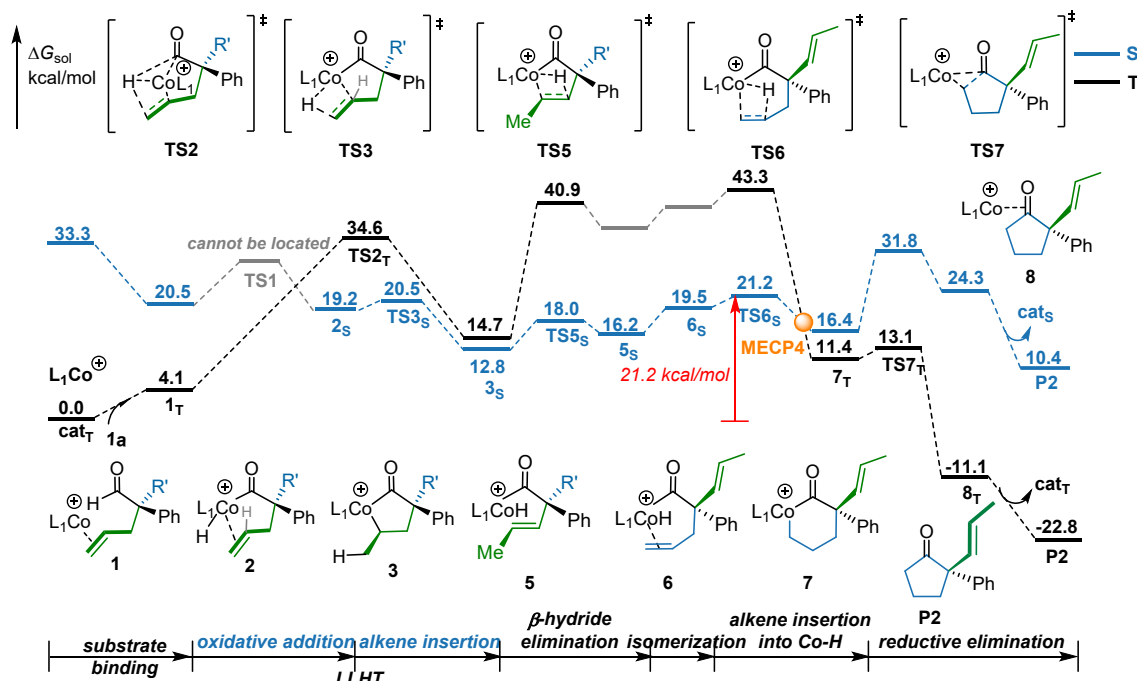

**Fig. S3.** Free energy profiles for the formation of **P2** in the presence of Co(I) and (*S,S*)-BDPP ligand at the level of SMD(Acetonitrile)/B3LYP-D3(BJ)/def2-TZVPP//SMD(Acetonitrile)/B3LYP-D3(BJ)/def2-SVP. S and T refer to the singlet and triplet states, respectively.

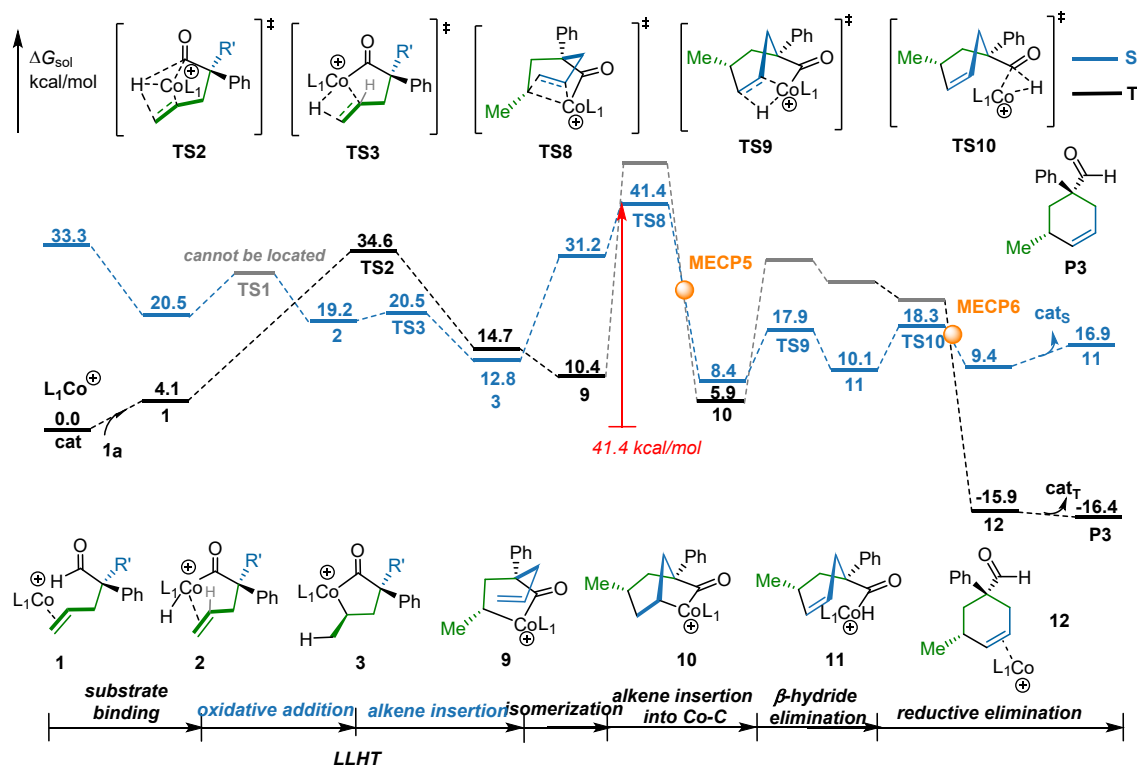

**Fig. S4.** Free energy profiles for the formation of **P3** in the presence of Co(I) and (*S,S*)-BDPP ligand at the level of SMD(Acetonitrile)/B3LYP-D3(BJ)/def2-TZVPP//SMD(Acetonitrile)/B3LYP-D3(BJ)/def2-SVP. S and T refer to the singlet and triplet states, respectively.

## 2. Comparison of three competitive pathways in the presence of (*S,S*)-BDPP ligand ( $L_1$ )

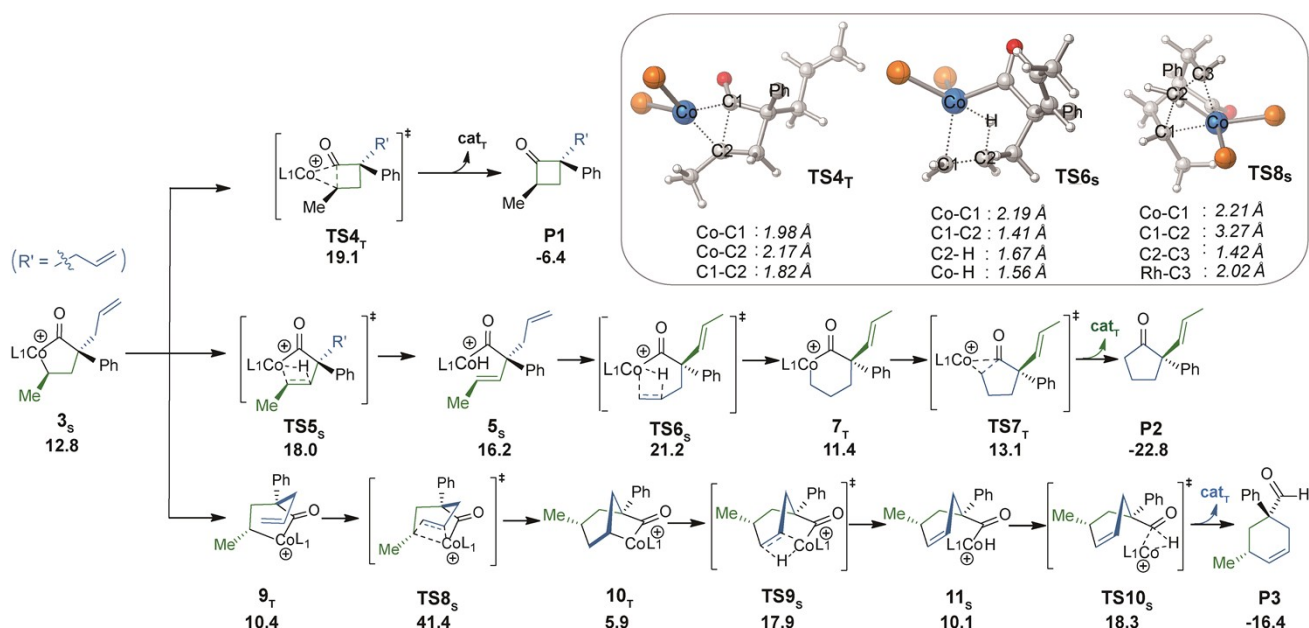

**Fig. S5.** Free energy profiles for three competitive pathways in the presence of Co(I) and (*S,S*)-BDPP ligand at the level of SMD(Acetonitrile)/B3LYP-D3(BJ)/def2-TZVPP//SMD(Acetonitrile)/B3LYP-D3(BJ)/def2-SVP. The subscripts S and T refer to the singlet and triplet states, respectively.

## 3. Detailed free energy profiles for Co(0) and (*S,S*)-BDPP ligand ( $L_1$ )

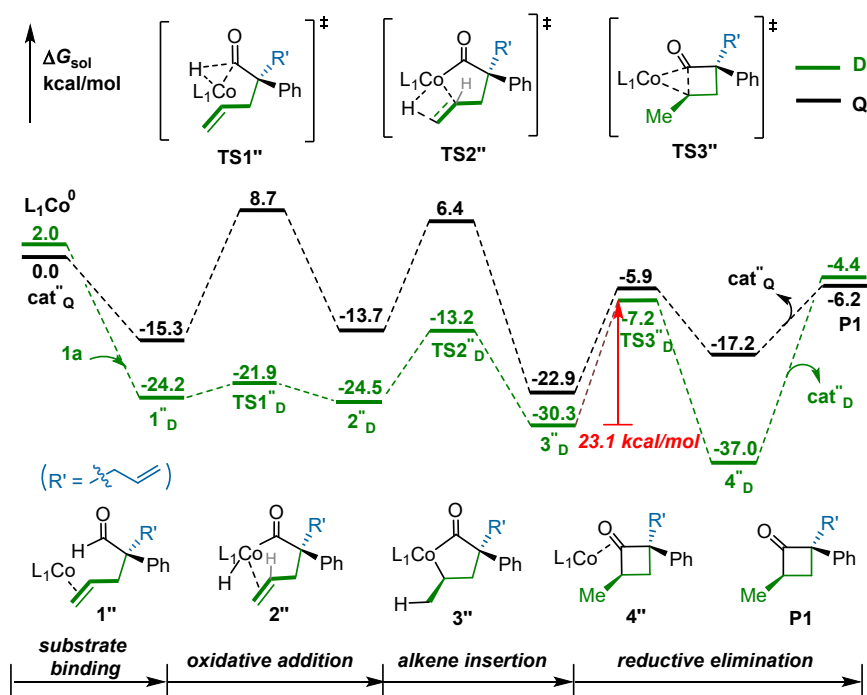

**Fig. S6.** Free energy profiles for the formation of **P1** in the presence of Co(0) and (*S,S*)-BDPP ligand at the level of SMD(Acetonitrile)/B3LYP-D3(BJ)/def2-TZVPP//SMD(Acetonitrile)/B3LYP-D3(BJ)/def2-SVP. D and Q refer to the doublet and quartet states, respectively.

#### 4. The solvent effect on the chemoselectivity of the cyclization reactions of dienyl aldehydes.

| Solvent | Metal | Ligand                                                                                                        | Chemoselectivity-determining step for the formation of P1                                                                                                      | Chemoselectivity-determining step for the formation of P2                                                                                                              | Chemoselectivity-determining step for the formation of P3                                                                                                             |
|---------|-------|---------------------------------------------------------------------------------------------------------------|----------------------------------------------------------------------------------------------------------------------------------------------------------------|------------------------------------------------------------------------------------------------------------------------------------------------------------------------|-----------------------------------------------------------------------------------------------------------------------------------------------------------------------|
| MeCN    | Co    | 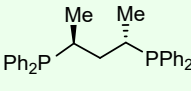<br>$L_1=(S,S)\text{-BDPP}$  | <br>$TS4_{MeCN}$<br><b>19.1 kcal/mol</b><br>( <i>reductive elimination</i> )  | <br>$TS6_{MeCN}$<br>21.2 kcal/mol<br>( <i>alkene insertion into Co-H</i> )           | <br>$TS8_{MeCN}$<br>41.1 kcal/mol<br>( <i>alkene insertion into Co-C</i> )         |
| MeCN    | Rh    | <br>$L_1=(S,S)\text{-BDPP}$  | <br>$TS4_{L_1Rh}^{MeCN}$<br>31.3 kcal/mol<br>( <i>reductive elimination</i> ) | <br>$TS7_{L_1Rh}^{MeCN}$<br><b>17.7 kcal/mol</b><br>( <i>reductive elimination</i> ) | <br>$TS8_{L_1Rh}^{MeCN}$<br>34.0 kcal/mol<br>( <i>alkene insertion into Co-C</i> ) |
| DCE     | Co    | <br>$L_1=(S,S)\text{-BDPP}$ | <br>$TS4_{DCE}$<br><b>15.8 kcal/mol</b><br>( <i>reductive elimination</i> )  | <br>$TS6_{DCE}$<br>19.1 kcal/mol<br>( <i>alkene insertion into Co-H</i> )           | <br>$TS8_{DCE}$<br>38.1 kcal/mol<br>( <i>alkene insertion into Co-C</i> )         |

**Fig. S7.** A comparison of the effects of ligands, transition metal centers, and solvents on the chemoselectivity of the cyclization reactions of dienyl aldehydes.

Since the Co- and Rh-catalyzed reactions differ in both ligand and solvent, we have also investigated the solvent effect on the chemoselectivity of the cyclization reactions of dienyl aldehydes. A comparison of the calculated results for  $L_1Co(I)$ -catalyzed cyclization reactions in both MeCN and DCE indicates that the solvent is not a pivotal factor in regulating the reaction pathways.

## 5. Detailed free energy profiles and additional results for Rh(I) and (S,S)-BDPP ligand (L<sub>1</sub>)

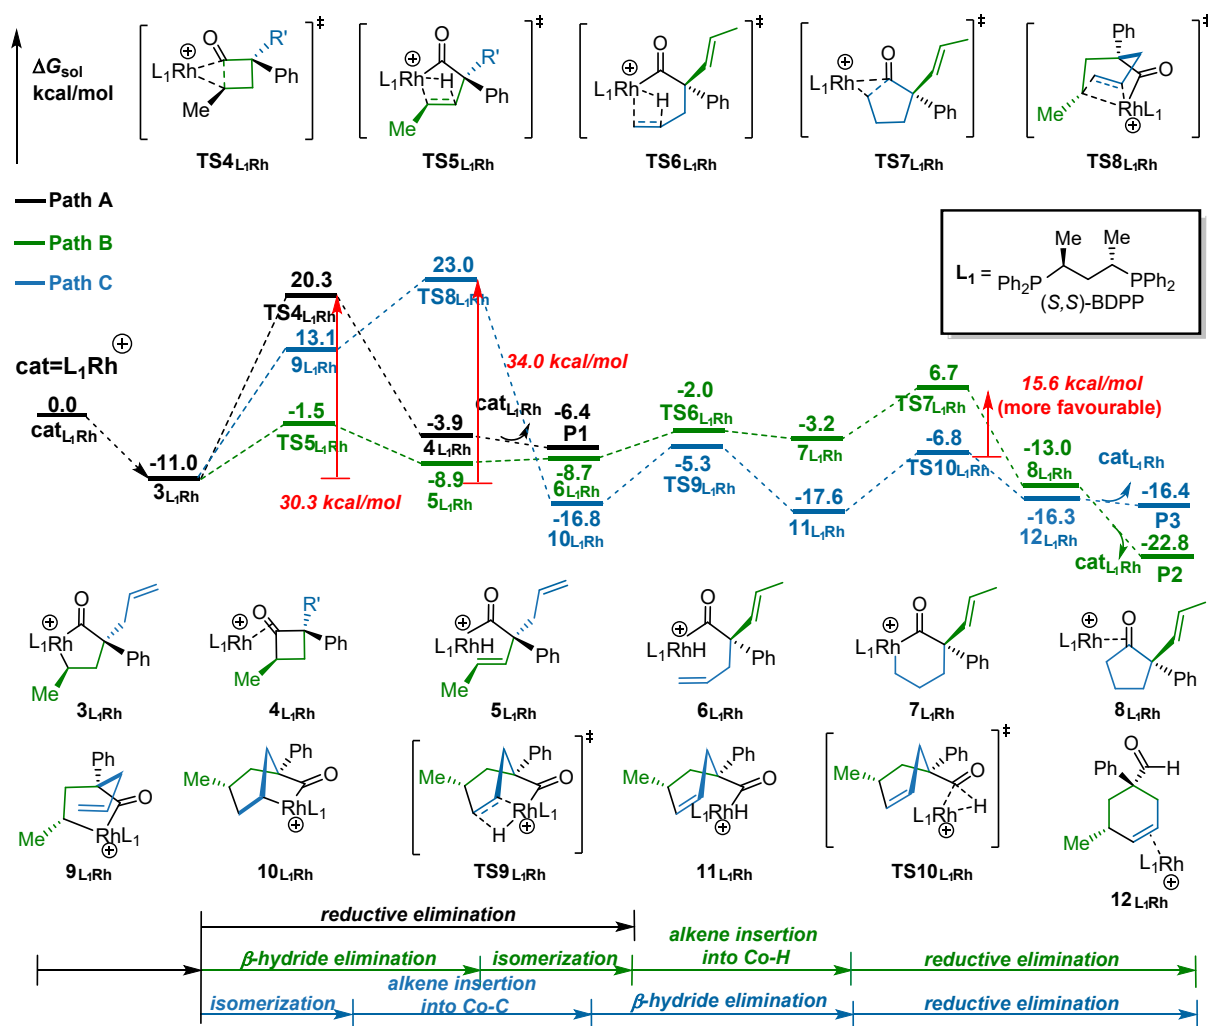

**Fig. S8.** Free energy profiles for the formation of **P1**, **P2** and **P3** in the presence of Rh(I) and (S,S)-BDPP ligand at the level of SMD(Acetonitrile)/B3LYP-D3(BJ)/def2-TZVPP//SMD(Acetonitrile)/B3LYP-D3(BJ)/def2-SVP/ECP28MDF\_AVZDZ(Rh).

## 6. Detailed free energy profiles and additional results for Rh and (*R*)-MeO-BIPHEP ligand ( $L_2$ )

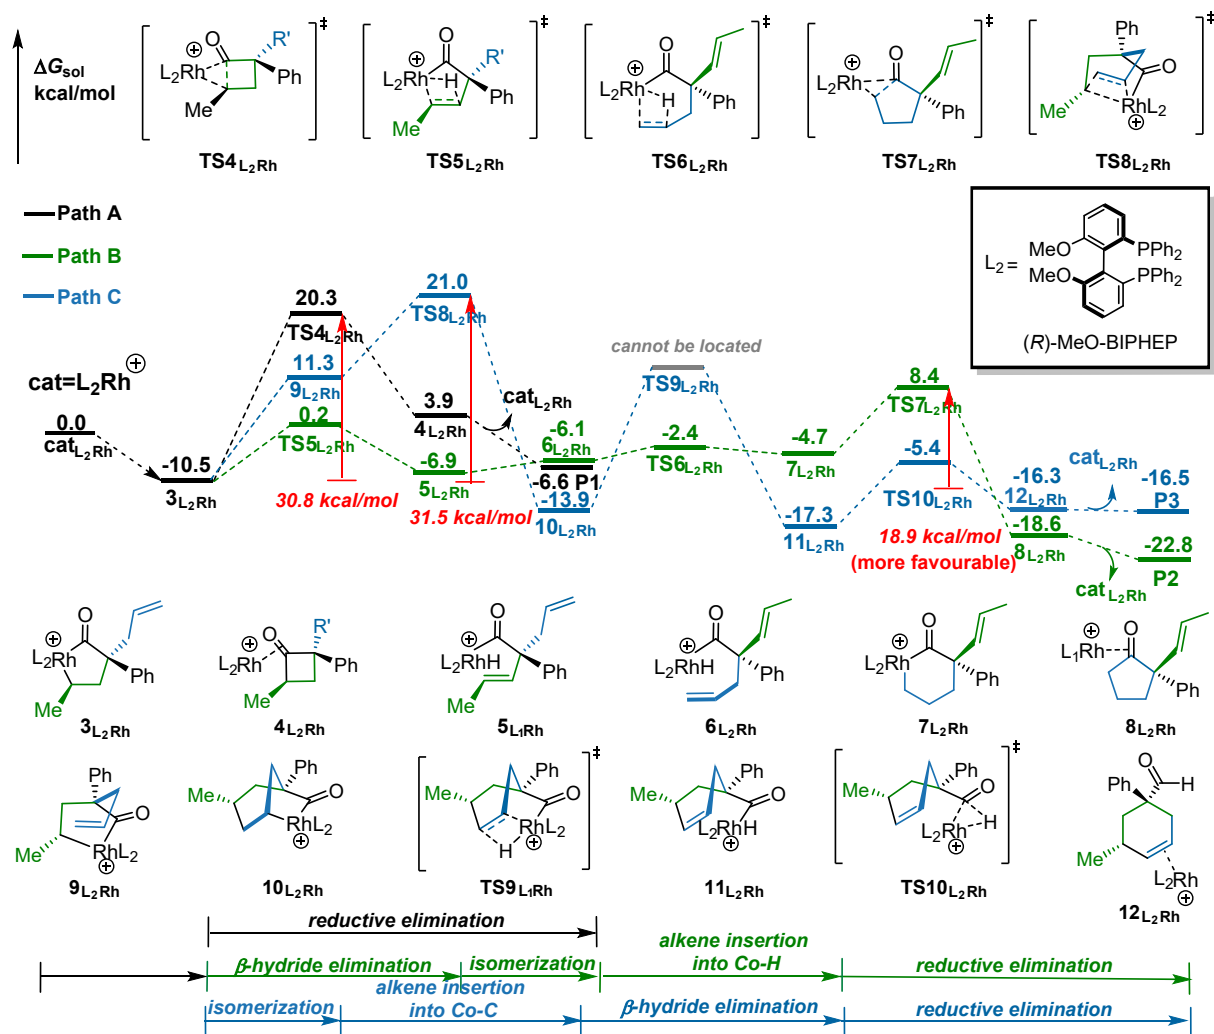

**Fig. S9.** Free energy profiles for the formation of **P1**, **P2** and **P3** in the presence of Rh(I) and (*R*)-MeO-BIPHEP ligand at the level of SMD(DiChloroEthane)/B3LYP-D3(BJ)/def2-TZVPP//SMD(DiChloroEthane)/B3LYP-D3(BJ)/def2-SVP/ECP28MDF\_AVZDZ(Rh).

## 7. Electrostatic potential (ESP) surfaces and the surface areas for $3s$ and $3_{L1Rh}$

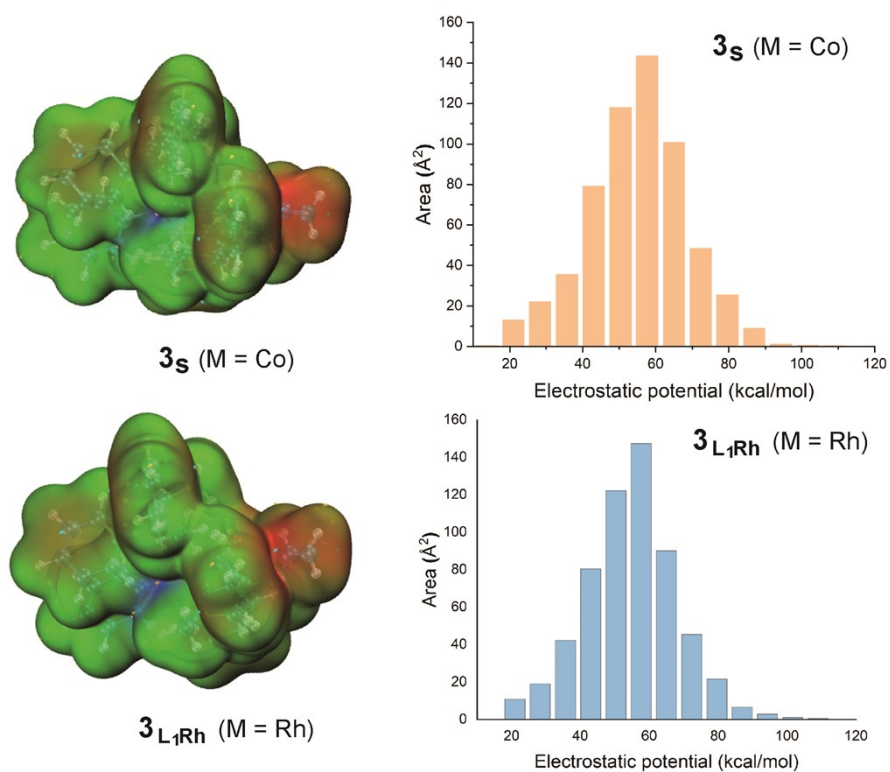

Fig. S10. Electrostatic potential (ESP) surfaces for  $3s$  and  $3_{L1Rh}$ .

## 8. ETS-NOCV analysis for the cobaltacycle intermediate $3s$ and rhodacycle intermediate $3_{L1Rh}$ .

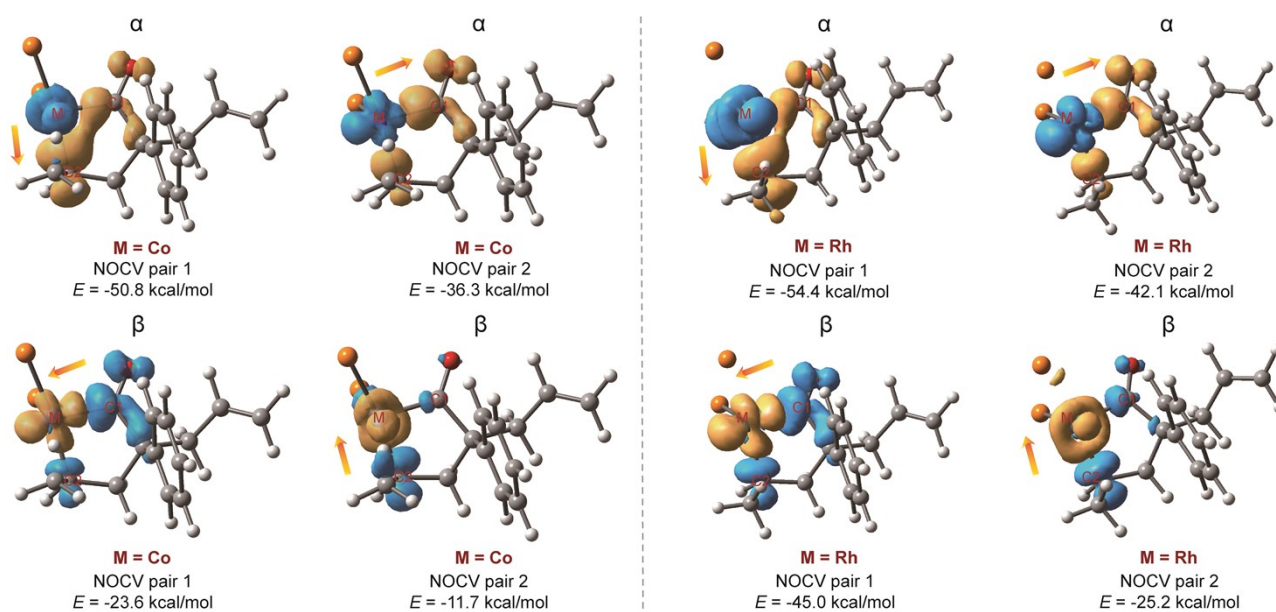

Fig. S11. The dominant orbital interactions revealed by the ETS-NOCV analysis for the cobaltacycle intermediate  $3s$  and rhodacycle intermediate  $3_{L1Rh}$  (isovalue = 0.003).



## 9. Results of the minimum energy crossing points

The minimum energy crossing points (MECPs) were searched at SMD(Acetonitrile)/B3LYP-D3(BJ)/def2-SVP level via sobMECP, which is a modified version of Harvey's MECP program by Tian Lu<sup>[S1]</sup>.

**Table S1.** Calculated energies of the MECPs

| Low-spin state (energies in a.u.)      | High-spin state (energies in a.u.)     | MECPs (energies in a.u.)    |
|----------------------------------------|----------------------------------------|-----------------------------|
| <b>3<sub>S</sub>-R</b> (-3805.604041)  | <b>3<sub>T</sub>-R</b> (-3805.593597)  | <b>MECP2</b> (-3805.586345) |
| <b>3<sub>S</sub>-S</b> (-3805.593866)  | <b>3<sub>T</sub>-S</b> (-3805.590818)  | <b>MECP3</b> (-3805.586776) |
| <b>7<sub>S</sub>-R</b> (-3805.584757)  | <b>7<sub>T</sub>-R</b> (-3805.584757)  | <b>MECP4</b> (-3805.584454) |
| <b>10<sub>S</sub>-R</b> (-3805.625725) | <b>10<sub>T</sub>-R</b> (-3805.624627) | <b>MECP5</b> (-3805.622377) |
| <b>12<sub>S</sub>-R</b> (-3805.608419) | <b>12<sub>T</sub>-R</b> (-3805.644442) | <b>MECP6</b> (-3805.607435) |

For the L<sub>1</sub>Co(I)-catalyzed cyclization of **1a**, the reaction initiates on the triplet potential energy surface before reaching point B (see Fig. S12), which approximates the location of MECP1. Following this spin surface crossing, hydrogen transfer is completed via an alkene insertion step, as represented by transition state **TS3<sub>S</sub>**. The changes of structures along the minimum energy path of triplet state and singlet states are shown in Fig. S12.

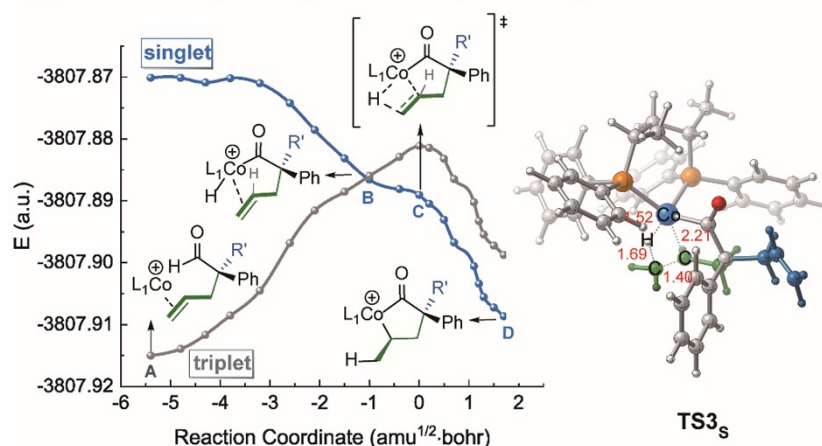

**Fig. S12.** Electronic energies along the minimum energy path of triplet state and singlet states.

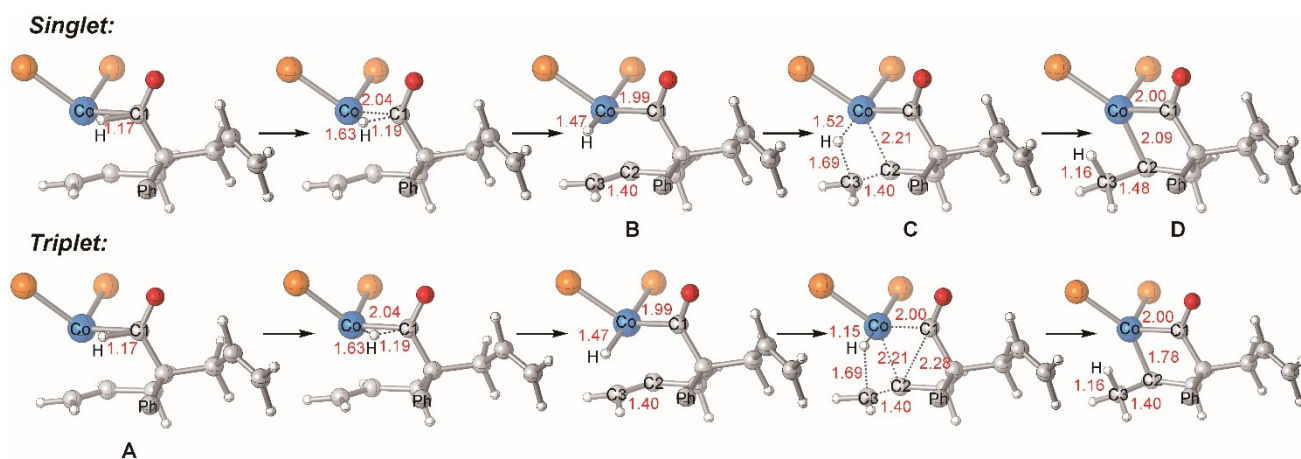

**Fig. S13.** The changes of structures along the minimum energy path of triplet state and singlet states.

## References

[S1] (a) J. N. Harvey, M. Aschi, H. Schwarz and W. Koch, The singlet and triplet states of phenyl cation. A hybrid approach for locating minimum energy crossing points between non-interacting potential energy surfaces, *Theor. Chem. Acc.*, 1998, **99**, 95-99. (b) Tian Lu, sobMECP program, <http://sobereva.com/286>

## 10. Calculated energies and imaginary frequencies

**Table S2.** Calculated energies and imaginary frequencies for Co.

| Stationary point        | Corrected thermal correction to Gibbs free energy at B3LYP-D3(BJ)/def2SVP (in a.u.) | Single-point energy including solvation energy at B3LYP-D3(BJ)/def2-TZVPP (in a.u.) | Imaginary frequencies (in $\text{cm}^{-1}$ ) |
|-------------------------|-------------------------------------------------------------------------------------|-------------------------------------------------------------------------------------|----------------------------------------------|
| <b>1a</b>               | 0.211739                                                                            | -618.606239                                                                         |                                              |
| <b>P1</b>               | 0.214437                                                                            | -618.619164                                                                         |                                              |
| <b>P1'</b>              | 0.214649                                                                            | -618.618217                                                                         |                                              |
| <b>P2</b>               | 0.216625                                                                            | -618.647483                                                                         |                                              |
| <b>P3</b>               | 0.218865                                                                            | -618.639413                                                                         |                                              |
| <b>cat<sub>s</sub></b>  | 0.441130                                                                            | -3189.252257                                                                        |                                              |
| <b>cat<sub>T</sub></b>  | 0.435279                                                                            | -3189.299400                                                                        |                                              |
| <b>1<sub>s</sub></b>    | 0.683918                                                                            | -3807.906584                                                                        |                                              |
| <b>1<sub>T</sub></b>    | 0.679416                                                                            | -3807.928093                                                                        |                                              |
| <b>TS2<sub>T</sub></b>  | 0.681060                                                                            | -3807.881149                                                                        | 742.04 <i>i</i>                              |
| <b>2<sub>s</sub></b>    | 0.688436                                                                            | -3807.913163                                                                        |                                              |
| <b>TS3<sub>s</sub></b>  | 0.686628                                                                            | -3807.909184                                                                        | 610.34 <i>i</i>                              |
| <b>3<sub>s</sub></b>    | 0.688832                                                                            | -3807.923681                                                                        |                                              |
| <b>3<sub>T</sub></b>    | 0.683761                                                                            | -3807.915577                                                                        |                                              |
| <b>TS4<sub>T</sub></b>  | 0.683002                                                                            | -3807.907876                                                                        | 153.96 <i>i</i>                              |
| <b>4<sub>s</sub></b>    | 0.686350                                                                            | -3807.893306                                                                        |                                              |
| <b>4<sub>T</sub></b>    | 0.682504                                                                            | -3807.937274                                                                        |                                              |
| <b>1'<sub>s</sub></b>   | 0.684994                                                                            | -3807.905285                                                                        |                                              |
| <b>1'<sub>T</sub></b>   | 0.679149                                                                            | -3807.926378                                                                        |                                              |
| <b>TS2'<sub>T</sub></b> | 0.678528                                                                            | -3807.873952                                                                        | 896.66 <i>i</i>                              |
| <b>2'<sub>s</sub></b>   | 0.689422                                                                            | -3807.911881                                                                        |                                              |
| <b>TS3'<sub>s</sub></b> | 0.689316                                                                            | -3807.907382                                                                        | 657.51 <i>i</i>                              |
| <b>3'<sub>s</sub></b>   | 0.688268                                                                            | -3807.913653                                                                        |                                              |

|                         |          |              |                 |
|-------------------------|----------|--------------|-----------------|
| <b>3'<sub>T</sub></b>   | 0.682319 | -3807.912028 |                 |
| <b>TS4'<sub>s</sub></b> | 0.688916 | -3807.893306 | 306.57 <i>i</i> |
| <b>TS4'<sub>T</sub></b> | 0.679888 | -3807.898636 | 225.69 <i>i</i> |
| <b>4'<sub>s</sub></b>   | 0.684209 | -3807.873036 |                 |
| <b>4'<sub>T</sub></b>   | 0.680345 | -3807.943756 |                 |
| <b>TS5<sub>s</sub></b>  | 0.682406 | -3807.908999 | 418.32 <i>i</i> |
| <b>TS5<sub>T</sub></b>  | 0.677657 | -3807.867698 | 719.26 <i>i</i> |
| <b>5<sub>s</sub></b>    | 0.684979 | -3807.914486 |                 |
| <b>6<sub>s</sub></b>    | 0.686845 | -3807.911104 |                 |
| <b>TS6<sub>s</sub></b>  | 0.684575 | -3807.906009 | 701.25 <i>i</i> |
| <b>TS6<sub>T</sub></b>  | 0.680291 | -3807.866599 | 712.22 <i>i</i> |
| <b>7<sub>s</sub></b>    | 0.691820 | -3807.920454 |                 |
| <b>7<sub>T</sub></b>    | 0.682355 | -3807.919462 |                 |
| <b>TS7<sub>s</sub></b>  | 0.687065 | -3807.891616 | 303.84 <i>i</i> |
| <b>TS7<sub>T</sub></b>  | 0.681746 | -3807.916102 | 229.37 <i>i</i> |
| <b>8<sub>s</sub></b>    | 0.688368 | -3807.904834 |                 |
| <b>8<sub>T</sub></b>    | 0.681314 | -3807.954329 |                 |
| <b>9<sub>s</sub></b>    | 0.691049 | -3807.895750 |                 |
| <b>9<sub>T</sub></b>    | 0.681644 | -3807.920277 |                 |
| <b>TS8<sub>s</sub></b>  | 0.694809 | -3807.884093 | 320.25 <i>i</i> |
| <b>10<sub>s</sub></b>   | 0.697501 | -3807.939380 |                 |
| <b>10<sub>T</sub></b>   | 0.693638 | -3807.939518 |                 |
| <b>TS9<sub>s</sub></b>  | 0.686421 | -3807.913227 | 631.93 <i>i</i> |
| <b>11<sub>s</sub></b>   | 0.688597 | -3807.927702 |                 |
| <b>TS10<sub>s</sub></b> | 0.687948 | -3807.914000 | 836.47 <i>i</i> |
| <b>12<sub>s</sub></b>   | 0.688076 | -3807.928427 |                 |
| <b>12<sub>T</sub></b>   | 0.685401 | -3807.966006 |                 |
| <b>cat"<sub>D</sub></b> | 0.434605 | -3189.356467 |                 |
| <b>cat"<sub>Q</sub></b> | 0.434607 | -3189.359713 |                 |

|                                      |          |              |                 |
|--------------------------------------|----------|--------------|-----------------|
| <b>1<sup>''</sup><sub>D</sub></b>    | 0.679211 | -3808.034033 |                 |
| <b>1<sup>''</sup><sub>Q</sub></b>    | 0.679093 | -3808.019666 |                 |
| <b>TS1<sup>''</sup><sub>D</sub></b>  | 0.679953 | -3808.031154 | 742.97 <i>i</i> |
| <b>TS1<sup>''</sup><sub>Q</sub></b>  | 0.671982 | -3807.974325 | 527.51 <i>i</i> |
| <b>2<sup>''</sup><sub>D</sub></b>    | 0.678977 | -3808.034341 |                 |
| <b>2<sup>''</sup><sub>Q</sub></b>    | 0.671583 | -3808.009681 |                 |
| <b>TS2<sup>''</sup><sub>D</sub></b>  | 0.680978 | -3808.01819  | 709.81 <i>i</i> |
| <b>TS2<sup>''</sup><sub>Q</sub></b>  | 0.670503 | -3807.97661  | 897.92 <i>i</i> |
| <b>3<sup>''</sup><sub>D</sub></b>    | 0.679301 | -3808.043858 |                 |
| <b>3<sup>''</sup><sub>Q</sub></b>    | 0.675640 | -3808.027731 |                 |
| <b>TS3<sup>''</sup><sub>D</sub></b>  | 0.681045 | -3808.006838 | 115.37 <i>i</i> |
| <b>TS3<sup>''</sup><sub>Q</sub></b>  | 0.678087 | -3807.996775 | 284.42 <i>i</i> |
| <b>4<sup>''</sup><sub>D</sub></b>    | 0.684589 | -3808.059836 |                 |
| <b>4<sup>''</sup><sub>Q</sub></b>    | 0.678150 | -3808.02182  |                 |
| <b>cat<sub>S</sub><sup>DCE</sup></b> | 0.443999 | -3189.244593 |                 |
| <b>cat<sub>T</sub><sup>DCE</sup></b> | 0.438384 | -3189.290882 |                 |
| <b>TS4<sub>T</sub><sup>DCE</sup></b> | 0.683427 | -3807.90169  | 160.97 <i>i</i> |
| <b>TS6<sub>S</sub><sup>DCE</sup></b> | 0.686214 | -3807.899194 | 689.87 <i>i</i> |
| <b>TS8<sub>S</sub><sup>DCE</sup></b> | 0.69735  | -3807.880183 | 318.98 <i>i</i> |

**Table S3.** Calculated energies and imaginary frequencies for Rh.

| Stationary point            | Corrected thermal correction to Gibbs free energy at B3LYP-D3(BJ)/def2SVP ECP60MDF_AVDZ(Rh) (in a.u.) | Single-point energy including solvation energy at B3LYP-D3(BJ)/def2-TZVPP (in a.u.) | Imaginary frequencies (in cm <sup>-1</sup> ) |
|-----------------------------|-------------------------------------------------------------------------------------------------------|-------------------------------------------------------------------------------------|----------------------------------------------|
| <b>cat</b> <sub>L1Rh</sub>  | 0.444477                                                                                              | -1917.117249                                                                        |                                              |
| <b>3</b> <sub>L1Rh</sub>    | 0.691140                                                                                              | -2535.772158                                                                        |                                              |
| <b>TS4</b> <sub>L1Rh</sub>  | 0.688465                                                                                              | -2535.720114                                                                        | 178.94 <i>i</i>                              |
| <b>4</b> <sub>L1Rh</sub>    | 0.684651                                                                                              | -2535.754706                                                                        |                                              |
| <b>TS5</b> <sub>L1Rh</sub>  | 0.684051                                                                                              | -2535.750430                                                                        | 758.81 <i>i</i>                              |
| <b>5</b> <sub>L1Rh</sub>    | 0.685126                                                                                              | -2535.763304                                                                        |                                              |
| <b>6</b> <sub>L1Rh</sub>    | 0.685655                                                                                              | -2535.763438                                                                        |                                              |
| <b>TS6</b> <sub>L1Rh</sub>  | 0.685655                                                                                              | -2535.752752                                                                        | 677.64 <i>i</i>                              |
| <b>7</b> <sub>L1Rh</sub>    | 0.692354                                                                                              | -2535.761360                                                                        |                                              |
| <b>TS7</b> <sub>L1Rh</sub>  | 0.689055                                                                                              | -2535.742223                                                                        | 386.57 <i>i</i>                              |
| <b>8</b> <sub>L1Rh</sub>    | 0.687098                                                                                              | -2535.771788                                                                        |                                              |
| <b>9</b> <sub>L1Rh</sub>    | 0.688226                                                                                              | -2535.731297                                                                        |                                              |
| <b>TS8</b> <sub>L1Rh</sub>  | 0.695699                                                                                              | -2535.722975                                                                        | 304.81 <i>i</i>                              |
| <b>10</b> <sub>L1Rh</sub>   | 0.701197                                                                                              | -2535.791827                                                                        |                                              |
| <b>TS9</b> <sub>L1Rh</sub>  | 0.686184                                                                                              | -2535.758611                                                                        | 483.42 <i>i</i>                              |
| <b>11</b> <sub>L1Rh</sub>   | 0.69001                                                                                               | -2535.781975                                                                        |                                              |
| <b>TS10</b> <sub>L1Rh</sub> | 0.68886                                                                                               | -2535.763580                                                                        | 526.20 <i>i</i>                              |
| <b>12</b> <sub>L1Rh</sub>   | 0.692414                                                                                              | -2535.782333                                                                        |                                              |
| <b>cat</b> <sub>L2Rh</sub>  | 0.520221                                                                                              | -2411.929072                                                                        |                                              |
| <b>3</b> <sub>L2Rh</sub>    | 0.768403                                                                                              | -3030.584948                                                                        |                                              |
| <b>TS4</b> <sub>L2Rh</sub>  | 0.763333                                                                                              | -3030.530815                                                                        | 111.83 <i>i</i>                              |
| <b>4</b> <sub>L2Rh</sub>    | 0.769983                                                                                              | -3030.563541                                                                        |                                              |
| <b>TS5</b> <sub>L2Rh</sub>  | 0.760154                                                                                              | -3030.559563                                                                        | 722.56 <i>i</i>                              |
| <b>5</b> <sub>L2Rh</sub>    | 0.761618                                                                                              | -3030.572440                                                                        |                                              |
| <b>6</b> <sub>L2Rh</sub>    | 0.763136                                                                                              | -3030.572616                                                                        |                                              |
| <b>TS6</b> <sub>L2Rh</sub>  | 0.76257                                                                                               | -3030.566117                                                                        | 537.18 <i>i</i>                              |
| <b>7</b> <sub>L2Rh</sub>    | 0.766165                                                                                              | -3030.573406                                                                        |                                              |

|                             |          |              |                 |
|-----------------------------|----------|--------------|-----------------|
| <b>TS7</b> <sub>L2Rh</sub>  | 0.764022 | -3030.550414 | 401.51 <i>i</i> |
| <b>8</b> <sub>L2Rh</sub>    | 0.767024 | -3030.596508 |                 |
| <b>9</b> <sub>L2Rh</sub>    | 0.764445 | -3030.546229 |                 |
| <b>TS8</b> <sub>L2Rh</sub>  | 0.771202 | -3030.537586 | 299.01 <i>i</i> |
| <b>10</b> <sub>L2Rh</sub>   | 0.774128 | -3030.596028 |                 |
| <b>11</b> <sub>L2Rh</sub>   | 0.766123 | -3030.593483 |                 |
| <b>TS10</b> <sub>L2Rh</sub> | 0.766073 | -3030.574396 | 420.68 <i>i</i> |
| <b>12</b> <sub>L2Rh</sub>   | 0.766533 | -3030.592314 |                 |

## 11. Cartesian coordinates of all optimized structures

1a

|   |             |             |             |
|---|-------------|-------------|-------------|
| C | 0.77505500  | -0.45557000 | 0.06427100  |
| C | 1.39321400  | -1.19092100 | -0.95946800 |
| C | 2.74691700  | -1.53069600 | -0.88391000 |
| C | 3.51154300  | -1.14702300 | 0.22199600  |
| C | 2.91079200  | -0.41180400 | 1.24698800  |
| C | 1.55875800  | -0.06658600 | 1.16389800  |
| H | 0.82274400  | -1.49813000 | -1.83708100 |
| H | 3.20555600  | -2.10020900 | -1.69639200 |
| H | 4.56900000  | -1.41633900 | 0.28219400  |
| H | 3.49580000  | -0.09836500 | 2.11537100  |
| H | 1.11900700  | 0.52717300  | 1.96893200  |
| C | -0.68643200 | -0.01427900 | -0.04058300 |
| C | -1.25336600 | 0.16828800  | 1.36283400  |
| O | -1.79418200 | 1.16605100  | 1.77764300  |
| H | -1.16210600 | -0.74279000 | 2.00543400  |
| C | -1.56176500 | -1.14318900 | -0.67748500 |
| H | -1.38021200 | -2.07997100 | -0.12775300 |
| H | -1.20890800 | -1.29476700 | -1.70934800 |
| C | -0.80183300 | 1.29183700  | -0.87270400 |
| H | -1.85343800 | 1.62022800  | -0.83718200 |
| H | -0.56466600 | 1.04655800  | -1.91978100 |
| C | -3.03442800 | -0.84522000 | -0.70618200 |
| C | -3.95432700 | -1.49930700 | 0.01009800  |
| H | -3.35590200 | -0.03032700 | -1.36550200 |
| H | -5.01644100 | -1.24220300 | -0.05137100 |
| H | -3.67842400 | -2.31932300 | 0.68297700  |
| C | 0.07140400  | 2.41873900  | -0.40370700 |
| C | 1.07509600  | 2.94862500  | -1.10946600 |
| H | -0.15230600 | 2.81373600  | 0.59339800  |
| H | 1.67636000  | 3.77538900  | -0.71806800 |
| H | 1.33361200  | 2.57357200  | -2.10644700 |

P1

|   |            |             |             |
|---|------------|-------------|-------------|
| C | 0.73499800 | -0.39823600 | -0.14228200 |
| C | 1.44926000 | -1.04943800 | -1.16094200 |
| C | 2.73288000 | -1.54970500 | -0.92674000 |
| C | 3.32304500 | -1.40862300 | 0.33401700  |
| C | 2.61975200 | -0.76176200 | 1.35450500  |
| C | 1.33765500 | -0.25547400 | 1.11755500  |

|   |             |             |             |
|---|-------------|-------------|-------------|
| H | 0.99652800  | -1.16483200 | -2.14901400 |
| H | 3.27376600  | -2.05369500 | -1.73206400 |
| H | 4.32596400  | -1.80164600 | 0.51937400  |
| H | 3.07156000  | -0.64742100 | 2.34346000  |
| H | 0.79001300  | 0.24432900  | 1.91712400  |
| C | -0.63016600 | 0.18036000  | -0.43325700 |
| C | -1.68594000 | 0.10817900  | 0.68838600  |
| O | -1.65831800 | 0.32284100  | 1.87450400  |
| H | -2.88273000 | -2.46528800 | 0.60037600  |
| C | -1.61608600 | -0.68291200 | -1.29109800 |
| H | -1.30383500 | -1.73500000 | -1.34091800 |
| H | -1.81283900 | -0.30853200 | -2.30426500 |
| C | -0.51624100 | 1.63285400  | -0.98793700 |
| H | -1.53185800 | 1.97776600  | -1.24938700 |
| H | 0.06582900  | 1.58554200  | -1.92242500 |
| C | -2.74808100 | -0.46730000 | -0.24382400 |
| C | -3.54972800 | -1.65402500 | 0.26589400  |
| H | -3.42078700 | 0.35110000  | -0.55606600 |
| H | -4.18257700 | -1.36029200 | 1.11856900  |
| H | -4.20608600 | -2.05426100 | -0.52324100 |
| C | 0.10598200  | 2.60052100  | -0.02718100 |
| C | 1.27414100  | 3.22126200  | -0.21670300 |
| H | -0.45340000 | 2.78303300  | 0.89869300  |
| H | 1.67984800  | 3.91769500  | 0.52381300  |
| H | 1.86832300  | 3.05456900  | -1.12241600 |

P1'

|   |             |             |             |
|---|-------------|-------------|-------------|
| C | -1.18858000 | 0.53623600  | 0.79593700  |
| O | -1.16811700 | 0.47043800  | 1.99853400  |
| H | -2.67989100 | 3.03987500  | 1.02868000  |
| C | 1.14690500  | -0.09004500 | -0.14287800 |
| C | 1.99046800  | 0.18279300  | -1.23090700 |
| C | 3.38015200  | 0.17275600  | -1.07697000 |
| C | 3.94816100  | -0.10738000 | 0.16984700  |
| C | 3.11540100  | -0.38129300 | 1.25991400  |
| C | 1.72640800  | -0.37763300 | 1.10407200  |
| H | 1.55813300  | 0.40251900  | -2.20991500 |
| H | 4.02143600  | 0.38648000  | -1.93614800 |
| H | 5.03431000  | -0.11171200 | 0.29166500  |
| H | 3.54958200  | -0.59917400 | 2.23932100  |
| H | 1.07807700  | -0.58610500 | 1.95668200  |
| C | -0.35563800 | -0.13376500 | -0.32117400 |
| C | -0.80138400 | -1.60675200 | -0.55511200 |
| H | -0.41953900 | -2.20869500 | 0.28429600  |



|    |             |             |             |                |             |             |             |
|----|-------------|-------------|-------------|----------------|-------------|-------------|-------------|
| H  | -0.28695700 | -1.94983700 | -1.46949500 | H              | 2.50734200  | -2.76896800 | -1.23547200 |
| C  | -0.99464800 | 0.90626300  | -1.30244300 | H              | 2.43599700  | -2.07538600 | 1.46753800  |
| H  | -1.45489400 | 0.48798600  | -2.20665000 | H              | 3.51646100  | -1.20765400 | 0.35828400  |
| H  | -0.28580200 | 1.69464200  | -1.58870900 |                |             |             |             |
| C  | -2.28271700 | -1.81156700 | -0.69668800 | P3             |             |             |             |
| C  | -3.05098900 | -2.42080400 | 0.21216100  | C              | 1.25700400  | 0.13096500  | -0.00482200 |
| H  | -2.74675200 | -1.41727700 | -1.60874500 | C              | 1.81388600  | -1.15864900 | -0.09014000 |
| H  | -4.12891600 | -2.53989500 | 0.06432800  | C              | 3.18770600  | -1.34218600 | -0.25260000 |
| H  | -2.62699400 | -2.82546200 | 1.13832600  | C              | 4.04080600  | -0.23599200 | -0.32534800 |
| C  | -1.97609900 | 1.38868900  | -0.19391700 | C              | 3.50376700  | 1.04918300  | -0.22703700 |
| C  | -2.09155000 | 2.87443400  | 0.11205800  | C              | 2.12596100  | 1.23141400  | -0.06380800 |
| H  | -2.97667400 | 0.93938700  | -0.32090900 | H              | 1.16327300  | -2.03237700 | -0.01827900 |
| H  | -2.58937400 | 3.40779600  | -0.71345500 | H              | 3.59381100  | -2.35475800 | -0.31851400 |
| H  | -1.09615000 | 3.32436800  | 0.25905100  | H              | 5.11714000  | -0.37638500 | -0.45216400 |
|    |             |             |             | H              | 4.15922500  | 1.92255500  | -0.27575900 |
| P2 |             |             |             | H              | 1.73914400  | 2.24738100  | 0.01078400  |
| C  | -0.62996000 | -0.21672800 | -0.18382700 | C              | -0.26663900 | 0.27935400  | 0.15932600  |
| C  | -1.62891900 | 0.15933200  | -1.09809600 | C              | -0.56106600 | -0.41969900 | 1.48707700  |
| C  | -2.96667500 | -0.17397700 | -0.88112200 | O              | -0.93174000 | -1.56276500 | 1.61298400  |
| C  | -3.33749300 | -0.89833400 | 0.25795200  | H              | -3.04061600 | -1.75108800 | 0.52618700  |
| C  | -2.35416600 | -1.28591000 | 1.16978300  | C              | -1.00266400 | -0.38073700 | -1.02949300 |
| C  | -1.01316900 | -0.94877800 | 0.94990200  | H              | -0.72094100 | -1.44017800 | -1.10040500 |
| H  | -1.35279400 | 0.72989800  | -1.98733600 | H              | -0.61548500 | 0.10673800  | -1.93772300 |
| H  | -3.72519900 | 0.13577200  | -1.60482400 | C              | -0.71524200 | 1.74329100  | 0.29460200  |
| H  | -4.38503800 | -1.15697800 | 0.43134100  | H              | -0.30780800 | 2.33281400  | -0.54469500 |
| H  | -2.62618900 | -1.85285100 | 2.06386200  | H              | -0.28944600 | 2.18821500  | 1.20883600  |
| H  | -0.27166300 | -1.25868100 | 1.68801500  | C              | -2.54768200 | -0.26085600 | -1.00795900 |
| C  | 0.83326100  | 0.13403100  | -0.49784900 | C              | -3.27175500 | -1.52788500 | -0.52402600 |
| C  | 1.72346200  | -0.15511100 | 0.75063800  | H              | -2.86205300 | -0.11773200 | -2.05893300 |
| O  | 1.81735800  | 0.56441100  | 1.71619500  | H              | -4.36369000 | -1.40988800 | -0.62187900 |
| H  | -0.47398900 | 1.88133200  | 1.34214300  | H              | -2.97368400 | -2.39989400 | -1.12849900 |
| C  | 1.01411200  | 1.56521000  | -0.96671600 | C              | -2.21505500 | 1.85827100  | 0.31354500  |
| H  | 1.65145100  | 1.67512100  | -1.85065300 | C              | -3.02306600 | 0.95676000  | -0.25909100 |
| H  | 0.94159900  | -2.70245200 | -0.39986400 | H              | -0.34639600 | 0.21327500  | 2.38563200  |
| C  | 1.39037700  | -0.89295500 | -1.52486600 | H              | -4.10883800 | 1.09989700  | -0.21004300 |
| H  | 2.27398100  | -0.45344900 | -2.01696300 | H              | -2.64547400 | 2.73415100  | 0.81021800  |
| H  | 0.65718800  | -1.13574000 | -2.30706300 |                |             |             |             |
| C  | 0.51958700  | 2.68362200  | -0.41586000 | L <sub>1</sub> |             |             |             |
| C  | -0.35831500 | 2.82033700  | 0.78979300  | P              | 1.54980100  | -0.48813400 | -0.19841000 |
| H  | 0.77417000  | 3.62744600  | -0.91541900 | C              | 1.18373200  | -1.24413600 | 1.48891800  |
| H  | 0.06026200  | 3.57213000  | 1.48106800  | C              | -0.22172100 | -0.90134500 | 2.01935800  |
| H  | -1.36042100 | 3.18764000  | 0.50150900  | C              | -1.45391700 | -1.51039000 | 1.32184800  |
| C  | 1.82125000  | -2.10567900 | -0.68940700 | P              | -1.83685700 | -0.88224200 | -0.41520700 |
| C  | 2.45964400  | -1.47047300 | 0.54871900  | C              | -3.69655200 | -0.96376000 | -0.45277400 |

|   |             |             |             |                  |             |             |             |
|---|-------------|-------------|-------------|------------------|-------------|-------------|-------------|
| C | -4.31786400 | -0.38832000 | -1.57920800 | H                | 3.46637600  | 3.76804800  | -1.79420200 |
| C | -5.70449000 | -0.41437600 | -1.73119400 | H                | 2.80642400  | 5.10935900  | 0.21036000  |
| C | -6.50569800 | -1.03558000 | -0.76482500 | H                | 1.63907700  | 3.98289600  | 2.11004100  |
| C | -5.90280700 | -1.62271500 | 0.34945300  | C                | -1.40023000 | -3.04252500 | 1.27412300  |
| C | -4.51110300 | -1.58644300 | 0.50623700  | H                | -2.33794700 | -3.47312300 | 0.89079400  |
| C | -1.67337800 | 0.95617100  | -0.25365800 | H                | -0.58921700 | -3.39980400 | 0.62034600  |
| C | -1.02614800 | 1.66225100  | -1.27873600 | H                | -1.22960900 | -3.45466200 | 2.28304400  |
| C | -2.19986800 | 1.67340800  | 0.83488200  | C                | 2.25679800  | -1.03066700 | 2.55999700  |
| C | -2.06863400 | 3.06237400  | 0.89988900  | H                | 2.30029200  | 0.01227600  | 2.90571100  |
| C | -1.42119800 | 3.75627700  | -0.13001200 | H                | 2.03690700  | -1.65994600 | 3.43907800  |
| C | -0.90562400 | 3.05452000  | -1.22250000 | H                | 3.25646100  | -1.30684100 | 2.19462500  |
| C | 3.16426600  | -1.31470400 | -0.55549700 |                  |             |             |             |
| C | 4.42530900  | -0.78517000 | -0.23271400 | cat <sub>s</sub> |             |             |             |
| C | 5.59165100  | -1.49992000 | -0.52146100 | P                | 1.46142100  | -0.35540400 | 0.21628700  |
| C | 5.51669700  | -2.75808400 | -1.12871200 | C                | 1.24489200  | -0.58129900 | 2.05901800  |
| C | 4.26700400  | -3.29638500 | -1.45238200 | C                | -0.12439300 | -0.11938100 | 2.59322700  |
| C | 3.10192000  | -2.57514700 | -1.17642400 | C                | -1.37745700 | -0.77968800 | 1.99206700  |
| C | 2.03922200  | 1.26719900  | 0.06650900  | P                | -1.56455700 | -0.39562900 | 0.17995000  |
| C | 1.66837200  | 2.03578600  | 1.18231700  | C                | -3.19637400 | -1.09874400 | -0.26974300 |
| C | 2.68075800  | 1.92085000  | -1.00541800 | C                | -3.18980600 | -2.22615500 | -1.10677600 |
| C | 2.96299400  | 3.28626100  | -0.95186500 | C                | -4.39086300 | -2.82890700 | -1.49039900 |
| C | 2.59350800  | 4.03826800  | 0.16987800  | C                | -5.60673700 | -2.30601200 | -1.03856500 |
| C | 1.94272400  | 3.40709700  | 1.23200500  | C                | -5.61917700 | -1.18052400 | -0.20585600 |
| H | 1.19320900  | -2.31541000 | 1.22761500  | C                | -4.41923300 | -0.57501200 | 0.17622600  |
| H | -0.34878000 | 0.18766100  | 2.09174300  | C                | -1.77630600 | 1.42149000  | 0.05660600  |
| H | -0.25917800 | -1.26988700 | 3.05996400  | C                | -1.34274100 | 2.01399400  | -1.14083400 |
| H | -2.30730400 | -1.21087900 | 1.94998300  | C                | -2.31078800 | 2.23197100  | 1.07003100  |
| H | -3.70344900 | 0.09617000  | -2.34418800 | C                | -2.41407800 | 3.61380700  | 0.88062100  |
| H | -6.16288100 | 0.04842400  | -2.60925700 | C                | -1.99232400 | 4.19388600  | -0.32026300 |
| H | -7.59181700 | -1.06246000 | -0.88349700 | C                | -1.45839500 | 3.39076200  | -1.33409700 |
| H | -6.51659700 | -2.11221100 | 1.11044000  | C                | 3.01373800  | -1.26265100 | -0.13922700 |
| H | -4.07654300 | -2.04924600 | 1.39302900  | C                | 4.29860200  | -0.70383000 | -0.05861600 |
| H | -0.60273900 | 1.11409600  | -2.12352800 | C                | 5.42073900  | -1.48824400 | -0.33873400 |
| H | -2.72223100 | 1.14389800  | 1.63564100  | C                | 5.26962000  | -2.83131600 | -0.70272800 |
| H | -2.47583600 | 3.60753700  | 1.75548000  | C                | 3.99140200  | -3.39235500 | -0.79056800 |
| H | -1.31652500 | 4.84283900  | -0.07701500 | C                | 2.86771600  | -2.60978300 | -0.51348500 |
| H | -0.39437800 | 3.58891900  | -2.02682000 | C                | 1.84414100  | 1.40026100  | -0.15349600 |
| H | 4.49951200  | 0.19133800  | 0.24922900  | C                | 1.52987100  | 2.47116300  | 0.69638700  |
| H | 6.56488400  | -1.07315000 | -0.26472900 | C                | 2.33620500  | 1.68147800  | -1.44220100 |
| H | 6.42987800  | -3.31549800 | -1.35230800 | C                | 2.52940200  | 2.99864200  | -1.85938700 |
| H | 4.19854900  | -4.27639000 | -1.93180000 | C                | 2.22124700  | 4.05996900  | -0.99976400 |
| H | 2.12844100  | -2.99415900 | -1.44813500 | C                | 1.72055900  | 3.79114100  | 0.27582000  |
| H | 1.14725300  | 1.57858800  | 2.02162000  | H                | 1.27778800  | -1.68176600 | 2.12067100  |
| H | 2.95928500  | 1.35248900  | -1.89721400 | H                | -0.21233500 | 0.97401000  | 2.51809500  |

|                  |             |             |             |   |             |             |             |
|------------------|-------------|-------------|-------------|---|-------------|-------------|-------------|
| H                | -0.13180400 | -0.34403800 | 3.67379600  | C | -1.84520000 | 1.36879200  | 0.02381400  |
| H                | -2.25417900 | -0.35276800 | 2.50499800  | C | -1.42774400 | 2.03824400  | -1.13911600 |
| H                | -2.23262500 | -2.63344200 | -1.44805900 | C | -2.27715700 | 2.12309100  | 1.12647400  |
| H                | -4.37789400 | -3.70610700 | -2.14207700 | C | -2.29351100 | 3.51971800  | 1.06212000  |
| H                | -6.54783700 | -2.77471100 | -1.33700900 | C | -1.88472600 | 4.17606800  | -0.10330900 |
| H                | -6.56975500 | -0.77123700 | 0.14537600  | C | -1.45505500 | 3.43234400  | -1.20732300 |
| H                | -4.43674000 | 0.30734800  | 0.82000300  | C | 3.26387000  | -1.21412500 | -0.13066500 |
| H                | -0.88961400 | 1.37748800  | -1.90534300 | C | 4.46732200  | -0.54267300 | 0.13791700  |
| H                | -2.64566800 | 1.79326900  | 2.01196800  | C | 5.69155400  | -1.18473100 | -0.06723800 |
| H                | -2.82584500 | 4.23999900  | 1.67605500  | C | 5.72601000  | -2.50248600 | -0.53763700 |
| H                | -2.07199700 | 5.27446900  | -0.46282500 | C | 4.53132300  | -3.17636300 | -0.81175800 |
| H                | -1.11290100 | 3.84120600  | -2.26756500 | C | 3.30711400  | -2.53062600 | -0.61766500 |
| H                | 4.42440900  | 0.34395800  | 0.22144700  | C | 1.88996100  | 1.32179300  | -0.13454400 |
| H                | 6.41924300  | -1.04897300 | -0.27175300 | C | 1.61267100  | 2.32702000  | 0.80398500  |
| H                | 6.15044100  | -3.43989200 | -0.92220900 | C | 2.31171000  | 1.70124700  | -1.42366600 |
| H                | 3.86923800  | -4.43892000 | -1.08040500 | C | 2.47343500  | 3.04598000  | -1.75697500 |
| H                | 1.86086000  | -3.03496800 | -0.58379600 | C | 2.20021300  | 4.04078900  | -0.81044400 |
| H                | 1.11606800  | 2.29469200  | 1.68697000  | C | 1.76703100  | 3.67609300  | 0.46594100  |
| H                | 2.56386700  | 0.86046700  | -2.12691900 | H | 1.22098300  | -1.92781400 | 1.89678300  |
| H                | 2.91569000  | 3.19862300  | -2.86197600 | H | -0.20766800 | 0.76021700  | 2.29776000  |
| H                | 2.36511200  | 5.09221000  | -1.32812700 | H | -0.19051300 | -0.54739700 | 3.46469300  |
| H                | 1.46534800  | 4.61184400  | 0.95037400  | H | -2.26635300 | -0.59204900 | 2.36198700  |
| C                | -1.39860400 | -2.30092700 | 2.16653500  | H | -2.78538800 | -2.53986400 | -1.65466300 |
| H                | -2.38371300 | -2.71906300 | 1.91180800  | H | -5.07425200 | -3.44291500 | -2.07812700 |
| H                | -0.65414300 | -2.78384500 | 1.51359300  | H | -7.04221400 | -2.42472100 | -0.93000100 |
| H                | -1.17315200 | -2.56993000 | 3.21132200  | H | -6.71401500 | -0.51449500 | 0.63893200  |
| C                | 2.40119300  | -0.03847200 | 2.90141300  | H | -4.43873200 | 0.37399600  | 1.06436300  |
| H                | 2.43592300  | 1.06012300  | 2.90652100  | H | -1.06835800 | 1.45492200  | -1.99171500 |
| H                | 2.28318300  | -0.37236500 | 3.94534500  | H | -2.59765800 | 1.62584900  | 2.04379100  |
| H                | 3.37244500  | -0.40712600 | 2.54124800  | H | -2.62538300 | 4.09775400  | 1.92827700  |
| Co               | -0.03276600 | -1.20728200 | -1.01275400 | H | -1.89360000 | 5.26792000  | -0.14829500 |
|                  |             |             |             | H | -1.12395600 | 3.93972100  | -2.11645000 |
| cat <sub>T</sub> |             |             |             | H | 4.44889300  | 0.48552200  | 0.50544900  |
| P                | 1.59837200  | -0.47528800 | 0.10663900  | H | 6.62398000  | -0.65428100 | 0.14252900  |
| C                | 1.23884300  | -0.82499800 | 1.91070300  | H | 6.68521600  | -3.00156600 | -0.69680300 |
| C                | -0.14620900 | -0.33328700 | 2.38293900  | H | 4.55310200  | -4.20228300 | -1.18792100 |
| C                | -1.41247000 | -0.96663800 | 1.77355600  | H | 2.36892400  | -3.04234400 | -0.85325400 |
| P                | -1.72879800 | -0.46267700 | 0.00037400  | H | 1.26230300  | 2.07688500  | 1.80350800  |
| C                | -3.45910300 | -1.03102400 | -0.26639900 | H | 2.50895200  | 0.93113700  | -2.17502700 |
| C                | -3.65290300 | -2.10213000 | -1.15220400 | H | 2.80563000  | 3.31996600  | -2.76154400 |
| C                | -4.93546200 | -2.60682600 | -1.38798600 | H | 2.31727700  | 5.09532400  | -1.07173500 |
| C                | -6.03767600 | -2.03611600 | -0.74446000 | H | 1.54012000  | 4.44448800  | 1.20886600  |
| C                | -5.85338200 | -0.96361800 | 0.13660200  | C | -1.41169200 | -2.49577200 | 1.84372100  |
| C                | -4.57108100 | -0.46339800 | 0.37599900  | H | -2.39315200 | -2.91117400 | 1.57043300  |

|    |             |             |             |   |             |             |             |
|----|-------------|-------------|-------------|---|-------------|-------------|-------------|
| H  | -0.66424400 | -2.92769800 | 1.15865700  | P | -0.65859000 | -1.72766900 | 0.50184700  |
| H  | -1.17286000 | -2.83396100 | 2.86542900  | C | 0.67128200  | -2.98614200 | 0.38827500  |
| C  | 2.34126800  | -0.39840100 | 2.88437500  | C | 1.85442200  | -2.68345800 | -0.29915900 |
| H  | 2.44838400  | 0.69443100  | 2.94318900  | C | 2.89075200  | -3.61958600 | -0.37363300 |
| H  | 2.09986600  | -0.76257600 | 3.89663100  | C | 2.74576100  | -4.86670500 | 0.23903700  |
| H  | 3.31699500  | -0.81950200 | 2.60430300  | C | 1.56214600  | -5.17882800 | 0.92130200  |
| Co | -0.03480100 | -1.17562300 | -1.26502900 | C | 0.52678300  | -4.24555600 | 0.99445500  |
|    |             |             |             | C | -2.11901000 | -2.66162300 | -0.09428700 |
| 1s |             |             |             | C | -2.09906700 | -3.06874300 | -1.44085400 |
| C  | 4.22985500  | 0.18904900  | -0.54586400 | C | -3.24217500 | -2.95387000 | 0.69059700  |
| C  | 4.79480600  | -0.30360300 | -1.73272400 | C | -4.33433900 | -3.62834900 | 0.13303900  |
| C  | 5.83806800  | -1.23342200 | -1.69814600 | C | -4.31073500 | -4.02440200 | -1.20563800 |
| C  | 6.33308700  | -1.69548100 | -0.47468700 | C | -3.18448800 | -3.74922600 | -1.99106400 |
| C  | 5.78321900  | -1.20932100 | 0.71416800  | C | -1.51780300 | 3.12487200  | 0.08675400  |
| C  | 4.74752400  | -0.27157200 | 0.67615400  | C | -2.37404700 | 3.80019400  | -0.79571900 |
| H  | 4.42678100  | 0.04012900  | -2.70024100 | C | -2.20404900 | 5.16772200  | -1.03553000 |
| H  | 6.26337500  | -1.60112300 | -2.63542900 | C | -1.17974900 | 5.87192600  | -0.39751600 |
| H  | 7.14304800  | -2.42857400 | -0.44892800 | C | -0.31956800 | 5.20246200  | 0.48056300  |
| H  | 6.16123300  | -1.55798500 | 1.67839300  | C | -0.48247500 | 3.83679500  | 0.71914600  |
| H  | 4.34168500  | 0.10338400  | 1.61862800  | C | -3.34638500 | 0.88694000  | -0.19679900 |
| C  | 3.09910400  | 1.22065900  | -0.56640200 | C | -4.50345700 | 1.38948600  | 0.42397900  |
| C  | 2.22203000  | 0.97049400  | 0.65468600  | C | -3.47992800 | 0.01883800  | -1.29124700 |
| O  | 1.95100900  | 1.77898700  | 1.51783000  | C | -4.74392500 | -0.36283900 | -1.74667500 |
| H  | 1.83514300  | -0.07201900 | 0.72040300  | C | -5.88945900 | 0.12153800  | -1.10981400 |
| C  | 2.18032100  | 1.00901100  | -1.80481700 | C | -5.76652700 | 1.00162700  | -0.02828700 |
| H  | 2.06192500  | -0.07300700 | -1.99730700 | H | -0.46945900 | 1.26391600  | 2.38118200  |
| H  | 2.69926100  | 1.40739000  | -2.69392400 | H | -2.89781000 | -0.59631300 | 2.20931800  |
| C  | 3.66221300  | 2.66931400  | -0.58008800 | H | -2.03924000 | -0.32750200 | 3.71676400  |
| H  | 2.80298300  | 3.36047100  | -0.54907900 | H | -1.31023900 | -2.40314800 | 2.71824800  |
| H  | 4.16913300  | 2.81554700  | -1.54619000 | H | 1.97271300  | -1.70776800 | -0.76932200 |
| C  | 0.81070000  | 1.62894300  | -1.67753000 | H | 3.80989100  | -3.36608700 | -0.90639400 |
| C  | -0.27702300 | 1.19244900  | -2.44412400 | H | 3.55434700  | -5.59997000 | 0.18569500  |
| H  | 0.76194900  | 2.61100100  | -1.19983600 | H | 1.44658800  | -6.15573700 | 1.39736200  |
| H  | -1.15191700 | 1.83304900  | -2.58744400 | H | -0.39620200 | -4.49576500 | 1.52369100  |
| H  | -0.13957000 | 0.41429700  | -3.20834200 | H | -1.22846500 | -2.84622400 | -2.06398000 |
| C  | 4.60397000  | 3.00592800  | 0.53907600  | H | -3.28546900 | -2.66140600 | 1.73923800  |
| C  | 5.90164000  | 3.28273900  | 0.37855200  | H | -5.20732400 | -3.84356300 | 0.75396500  |
| H  | 4.17236000  | 3.01487500  | 1.54538700  | H | -5.16670900 | -4.54754500 | -1.63863400 |
| H  | 6.54442200  | 3.52763500  | 1.23005900  | H | -3.15607800 | -4.05966200 | -3.03831600 |
| H  | 6.37041300  | 3.27411500  | -0.61227600 | H | -3.17835500 | 3.26152800  | -1.29930300 |
| P  | -1.64926400 | 1.31474100  | 0.34157000  | H | -2.87822100 | 5.68247500  | -1.72451800 |
| C  | -1.54120600 | 1.08946500  | 2.19558800  | H | -1.04917000 | 6.94057100  | -0.58496700 |
| C  | -1.90920800 | -0.34415200 | 2.62193100  | H | 0.48712100  | 5.74502200  | 0.97959600  |
| C  | -0.89289100 | -1.46124400 | 2.32769900  | H | 0.21220400  | 3.32247700  | 1.38471100  |

|                |             |             |             |   |             |             |             |
|----------------|-------------|-------------|-------------|---|-------------|-------------|-------------|
| H              | -4.42623900 | 2.09568500  | 1.25027600  | H | -4.24760100 | -1.47673200 | 1.47627800  |
| H              | -2.58050300 | -0.36142400 | -1.77560400 | H | -6.38017300 | -2.61794000 | 1.16060200  |
| H              | -4.83011900 | -1.04560800 | -2.59459500 | H | -6.19827400 | -2.48611500 | -0.69411300 |
| H              | -6.88011000 | -0.18079700 | -1.45845400 | P | 0.84339500  | -1.70553900 | 0.54599000  |
| H              | -6.66008800 | 1.39302900  | 0.46411300  | C | 1.63862200  | -1.64358400 | 2.24637600  |
| C              | 0.44916900  | -1.21335900 | 3.02466800  | C | 2.61642500  | -0.47580500 | 2.49803500  |
| H              | 1.14323400  | -2.05322600 | 2.88325300  | C | 2.14273200  | 0.98145300  | 2.32633900  |
| H              | 0.94313900  | -0.29868900 | 2.66791600  | P | 1.85480700  | 1.46580200  | 0.54451800  |
| H              | 0.27601300  | -1.09542200 | 4.10649400  | C | 1.53811500  | 3.26884400  | 0.62650200  |
| C              | -2.34257000 | 2.09879900  | 3.02500800  | C | 0.21233900  | 3.69561200  | 0.45005400  |
| H              | -3.41297000 | 1.84820200  | 3.03774600  | C | -0.10999300 | 5.05280700  | 0.53474100  |
| H              | -1.98679700 | 2.06468200  | 4.06736100  | C | 0.89511200  | 5.99225600  | 0.78623800  |
| H              | -2.23245400 | 3.13081700  | 2.66607900  | C | 2.22045700  | 5.57277300  | 0.95373600  |
| Co             | -0.18912300 | 0.15124900  | -0.73744900 | C | 2.54351800  | 4.21574200  | 0.87453600  |
|                |             |             |             | C | 3.47871300  | 1.33596600  | -0.29448400 |
| I <sub>T</sub> |             |             |             | C | 3.49229400  | 1.33589800  | -1.69997800 |
| C              | -4.77612400 | 1.12171000  | -0.73317200 | C | 4.69775700  | 1.24362700  | 0.39719600  |
| C              | -5.38925800 | 1.47984000  | -1.94295000 | C | 5.90114200  | 1.13116600  | -0.30558100 |
| C              | -6.62097100 | 2.14183900  | -1.95195300 | C | 5.90370400  | 1.12011600  | -1.70333400 |
| C              | -7.26006800 | 2.46356400  | -0.75111600 | C | 4.69576800  | 1.23129500  | -2.39927400 |
| C              | -6.65999200 | 2.11266600  | 0.46140700  | C | -0.16458700 | -3.24077600 | 0.66322000  |
| C              | -5.43320100 | 1.44429400  | 0.46675600  | C | 0.25636300  | -4.47966100 | 0.15279300  |
| H              | -4.91467300 | 1.23696500  | -2.89441900 | C | -0.55240700 | -5.61148100 | 0.28890400  |
| H              | -7.08219700 | 2.40836100  | -2.90628300 | C | -1.78628300 | -5.52234500 | 0.94175800  |
| H              | -8.22114200 | 2.98364800  | -0.76022000 | C | -2.20878400 | -4.29395800 | 1.45946600  |
| H              | -7.14940000 | 2.35361900  | 1.40837600  | C | -1.40527500 | -3.15932200 | 1.31861300  |
| H              | -4.99007200 | 1.16086000  | 1.42511500  | C | 2.10877600  | -2.11844300 | -0.71842200 |
| C              | -3.46853000 | 0.33553300  | -0.68560800 | C | 3.49550500  | -2.07350400 | -0.50816400 |
| C              | -2.65689000 | 0.77852800  | 0.51190600  | C | 1.63596200  | -2.39540500 | -2.01636500 |
| O              | -2.00521000 | 0.01457200  | 1.21721800  | C | 2.52349500  | -2.62002900 | -3.06918200 |
| H              | -2.61998300 | 1.87562400  | 0.69506800  | C | 3.90433600  | -2.56581800 | -2.84778100 |
| C              | -2.52949400 | 0.68876800  | -1.88401600 | C | 4.38466600  | -2.29574400 | -1.56489900 |
| H              | -2.39005400 | 1.78049000  | -1.91949300 | H | 0.74439200  | -1.47184300 | 2.87011400  |
| H              | -3.05393200 | 0.40343900  | -2.81041500 | H | 3.53572100  | -0.63367800 | 1.92059500  |
| C              | -3.73730400 | -1.19337700 | -0.65913600 | H | 2.91989600  | -0.56939600 | 3.55492300  |
| H              | -2.76547100 | -1.70345200 | -0.57639300 | H | 2.95588100  | 1.62529300  | 2.69871600  |
| H              | -4.17818000 | -1.47156700 | -1.62831700 | H | -0.56487200 | 2.95205900  | 0.24537800  |
| C              | -1.18253500 | -0.00220200 | -1.88171500 | H | -1.14466700 | 5.37715000  | 0.39866800  |
| C              | -0.00881000 | 0.66078500  | -2.15379300 | H | 0.64726100  | 7.05489300  | 0.84752500  |
| H              | -1.19860100 | -1.09224400 | -1.97193400 | H | 3.00636400  | 6.30760800  | 1.14562200  |
| H              | 0.88133800  | 0.11443500  | -2.46903200 | H | 3.57975500  | 3.89366500  | 1.00225800  |
| H              | -0.00447900 | 1.74410700  | -2.31391700 | H | 2.55680300  | 1.41562700  | -2.25380700 |
| C              | -4.61711000 | -1.66182200 | 0.46127700  | H | 4.72352200  | 1.26137000  | 1.48724300  |
| C              | -5.78842700 | -2.28508100 | 0.30215600  | H | 6.84174100  | 1.05320900  | 0.24519500  |

|                  |             |             |             |   |             |             |             |
|------------------|-------------|-------------|-------------|---|-------------|-------------|-------------|
| H                | 6.84544100  | 1.02619000  | -2.24953300 | C | -0.96881800 | -0.81361600 | -2.05050900 |
| H                | 4.68794500  | 1.22639000  | -3.49186600 | C | -0.76882400 | 0.53153500  | -2.36959200 |
| H                | 1.22054000  | -4.56689200 | -0.35034600 | H | -0.21438500 | -1.53751200 | -2.37026900 |
| H                | -0.21367400 | -6.56901500 | -0.11493100 | H | 0.15705200  | 0.82031800  | -2.87606300 |
| H                | -2.41782400 | -6.40831900 | 1.04465100  | H | -1.61030100 | 1.21429400  | -2.50022100 |
| H                | -3.17441600 | -4.21284200 | 1.96406600  | C | -5.04415500 | -0.75114000 | 1.09966100  |
| H                | -1.74974500 | -2.19903200 | 1.70272700  | C | -6.35434000 | -0.55632300 | 0.92021600  |
| H                | 3.90348700  | -1.85859400 | 0.47640500  | H | -4.56749700 | -0.40428100 | 2.02206500  |
| H                | 0.56123800  | -2.44186000 | -2.20650300 | H | -6.96965500 | -0.06436000 | 1.68020600  |
| H                | 2.13435500  | -2.83390400 | -4.06773700 | H | -6.86079900 | -0.88133800 | 0.00400900  |
| H                | 4.60080500  | -2.73312500 | -3.67296800 | P | 0.82184600  | -1.79839600 | 0.52473000  |
| H                | 5.45999500  | -2.24936800 | -1.37863700 | C | 1.48582700  | -1.61762000 | 2.25763000  |
| C                | 0.88031300  | 1.29129000  | 3.13671000  | C | 2.51761400  | -0.47716600 | 2.34711400  |
| H                | 0.65907800  | 2.36854900  | 3.14275500  | C | 2.00060900  | 0.97403100  | 2.32287300  |
| H                | -0.00472200 | 0.76992700  | 2.73875800  | P | 1.45622000  | 1.53130800  | 0.63550000  |
| H                | 1.01898700  | 0.96850300  | 4.18126800  | C | 0.90033700  | 3.25446400  | 0.92042100  |
| C                | 2.26819700  | -2.96910000 | 2.68449500  | C | -0.46243400 | 3.57409600  | 0.85275200  |
| H                | 3.13655800  | -3.23771500 | 2.06465000  | C | -0.89597900 | 4.87483400  | 1.12508600  |
| H                | 2.61565000  | -2.88963800 | 3.72769000  | C | 0.03093700  | 5.86400300  | 1.46539400  |
| H                | 1.54790400  | -3.79735600 | 2.63315400  | C | 1.39389700  | 5.55020400  | 1.53287600  |
| Co               | -0.11190700 | 0.33720800  | -0.00948400 | C | 1.82945700  | 4.25130900  | 1.26243300  |
|                  |             |             |             | C | 2.95432900  | 1.73809700  | -0.39282600 |
|                  |             |             |             | C | 2.75837300  | 2.12986000  | -1.72952100 |
| TS2 <sub>T</sub> |             |             |             | C | 4.25685700  | 1.50295000  | 0.06978500  |
| C                | -3.66127400 | 0.75520700  | -1.06928900 | C | 5.34517200  | 1.64088700  | -0.79871700 |
| C                | -4.25860600 | 0.78403500  | -2.33959700 | C | 5.14394300  | 2.02134900  | -2.12762800 |
| C                | -4.88096300 | 1.94076100  | -2.81694600 | C | 3.84660500  | 2.27324400  | -2.59008000 |
| C                | -4.91799700 | 3.09833100  | -2.03337100 | C | -0.29204300 | -3.24588200 | 0.58791600  |
| C                | -4.34110600 | 3.07894300  | -0.76126500 | C | -0.30946700 | -4.18778600 | -0.45341000 |
| C                | -3.72787000 | 1.91718000  | -0.28334500 | C | -1.24323800 | -5.22762200 | -0.44919900 |
| H                | -4.24050300 | -0.10321700 | -2.97392300 | C | -2.16880300 | -5.33814100 | 0.59241900  |
| H                | -5.33645100 | 1.93579900  | -3.81051000 | C | -2.15862600 | -4.40097700 | 1.63085200  |
| H                | -5.39758000 | 4.00517700  | -2.40984600 | C | -1.23095400 | -3.35696500 | 1.62794000  |
| H                | -4.37008300 | 3.97058000  | -0.12982600 | C | 2.22967200  | -2.30078900 | -0.53042800 |
| H                | -3.30169900 | 1.92296500  | 0.71944800  | C | 2.94718300  | -3.49554300 | -0.34285800 |
| C                | -3.03286100 | -0.53556400 | -0.52676600 | C | 2.61301500  | -1.42575800 | -1.55810400 |
| C                | -1.94236800 | -0.14764500 | 0.51046700  | C | 3.71492100  | -1.71443100 | -2.36677200 |
| O                | -2.15068200 | -0.04662400 | 1.69727100  | C | 4.43686400  | -2.89296600 | -2.16055000 |
| H                | -0.60142500 | 1.37241300  | -0.91520600 | C | 4.04585200  | -3.78536700 | -1.15479600 |
| C                | -2.29985500 | -1.37457400 | -1.60341200 | H | 0.59381700  | -1.34050500 | 2.84018800  |
| H                | -2.95636900 | -1.52864600 | -2.47487000 | H | 3.29227700  | -0.62813000 | 1.57905100  |
| H                | -2.12849000 | -2.37411500 | -1.18381600 | H | 3.03235200  | -0.59748600 | 3.31472100  |
| C                | -4.14245200 | -1.42681600 | 0.11031500  | H | 2.84722100  | 1.62675200  | 2.58973100  |
| H                | -3.63528900 | -2.27777500 | 0.59404700  | H | -1.18397800 | 2.80232000  | 0.58362100  |
| H                | -4.74351400 | -1.83415800 | -0.71874500 |   |             |             |             |

|    |             |             |             |   |             |             |             |
|----|-------------|-------------|-------------|---|-------------|-------------|-------------|
| H  | -1.96082300 | 5.11331600  | 1.06783500  | H | -1.10161300 | -0.93217500 | 0.96458700  |
| H  | -0.30627400 | 6.88200400  | 1.67578800  | C | -0.96612300 | 2.60556700  | 1.43568100  |
| H  | 2.12124000  | 6.32246600  | 1.79505700  | H | -1.45195500 | 3.20362000  | 2.22221700  |
| H  | 2.89522800  | 4.01572700  | 1.31343700  | H | -0.37923300 | 3.31467600  | 0.84032600  |
| H  | 1.74746900  | 2.31946400  | -2.09815000 | C | -2.64044500 | 3.10839400  | -0.36925900 |
| H  | 4.44025200  | 1.21189300  | 1.10421600  | H | -1.83166800 | 3.50198800  | -1.00557700 |
| H  | 6.35579000  | 1.45080200  | -0.42937200 | H | -2.93432000 | 3.91502900  | 0.32111700  |
| H  | 5.99616600  | 2.12459100  | -2.80359200 | C | -0.02857100 | 1.59696200  | 2.04612700  |
| H  | 3.68224700  | 2.57811300  | -3.62638700 | C | -0.43745800 | 0.42711000  | 2.62985500  |
| H  | 0.40264700  | -4.10981800 | -1.27612100 | H | 1.01898700  | 1.89197800  | 2.15347400  |
| H  | -1.24629000 | -5.95307100 | -1.26640900 | H | 0.29496200  | -0.21308700 | 3.13115500  |
| H  | -2.89822900 | -6.15167700 | 0.59483900  | H | -1.48802200 | 0.20588400  | 2.81342900  |
| H  | -2.88249800 | -4.47658100 | 2.44573100  | C | -3.81578000 | 2.72608200  | -1.21862800 |
| H  | -1.25379900 | -2.62072500 | 2.43262600  | C | -5.05648100 | 3.19243400  | -1.04572500 |
| H  | 2.64181800  | -4.20797700 | 0.42368800  | H | -3.61361000 | 2.01355000  | -2.02446800 |
| H  | 2.03774100  | -0.51407300 | -1.71752300 | H | -5.87964800 | 2.88581000  | -1.69894900 |
| H  | 4.00589300  | -1.01643500 | -3.15493300 | H | -5.29597800 | 3.89822100  | -0.24205100 |
| H  | 5.30072300  | -3.12353200 | -2.78895200 | P | 1.78783300  | 0.98435500  | -0.50039700 |
| H  | 4.59969100  | -4.71495000 | -1.00263100 | C | 2.17685900  | 0.45233800  | -2.24689500 |
| C  | 0.86998200  | 1.21636600  | 3.32991300  | C | 2.28776700  | -1.07884600 | -2.35606000 |
| H  | 0.68756100  | 2.29026100  | 3.47494300  | C | 0.97001900  | -1.87220500 | -2.42007300 |
| H  | -0.07636000 | 0.75458800  | 3.00850100  | P | 0.07712900  | -1.89378200 | -0.78843500 |
| H  | 1.14698400  | 0.78512800  | 4.30534500  | C | -1.46094100 | -2.83787800 | -1.11595000 |
| C  | 2.06804600  | -2.90563300 | 2.84409300  | C | -2.55707000 | -2.20607500 | -1.72925300 |
| H  | 3.04190100  | -3.14490400 | 2.39246100  | C | -3.73556500 | -2.91514400 | -1.97053700 |
| H  | 2.22840800  | -2.77093800 | 3.92592700  | C | -3.83415300 | -4.26232600 | -1.60689300 |
| H  | 1.40062700  | -3.76803100 | 2.70595100  | C | -2.74385800 | -4.89914100 | -1.00812500 |
| Co | -0.09618800 | 0.11275600  | -0.23906500 | C | -1.56167000 | -4.19339900 | -0.76424300 |
|    |             |             |             | C | 1.06225800  | -2.98357600 | 0.31395900  |
| 2s |             |             |             | C | 0.67481000  | -3.07844500 | 1.66492000  |
| C  | -3.16386200 | 1.26951800  | 1.26219200  | C | 2.20576800  | -3.67652400 | -0.11346200 |
| C  | -3.72775600 | 1.85367000  | 2.40664800  | C | 2.95623200  | -4.42938300 | 0.79438000  |
| C  | -4.81634100 | 1.26190600  | 3.05404200  | C | 2.57194700  | -4.50737300 | 2.13553100  |
| C  | -5.36525100 | 0.07045500  | 2.56996400  | C | 1.42257400  | -3.83685500 | 2.56644800  |
| C  | -4.82148700 | -0.51361200 | 1.42298900  | C | 1.70411100  | 2.80828100  | -0.61758600 |
| C  | -3.73943100 | 0.08654900  | 0.77475700  | C | 2.27763600  | 3.63689900  | 0.36026100  |
| H  | -3.32076500 | 2.78416700  | 2.80595100  | C | 2.09509000  | 5.02150600  | 0.30935600  |
| H  | -5.23554200 | 1.73675000  | 3.94483100  | C | 1.34013600  | 5.59559600  | -0.71739300 |
| H  | -6.21198900 | -0.39513900 | 3.08032100  | C | 0.76871400  | 4.77687500  | -1.69660700 |
| H  | -5.23951200 | -1.44078700 | 1.02239700  | C | 0.94524800  | 3.39255500  | -1.64720000 |
| H  | -3.34474600 | -0.38511900 | -0.12239000 | C | 3.27158200  | 0.59793300  | 0.49869800  |
| C  | -2.02846200 | 1.97141000  | 0.50810500  | C | 4.51443300  | 1.23070300  | 0.31788000  |
| C  | -1.27477500 | 0.93411400  | -0.39462800 | C | 3.14854500  | -0.40234200 | 1.47742000  |
| O  | -1.49645100 | 0.84528600  | -1.57931600 | C | 4.24977400  | -0.78032300 | 2.25004800  |

|      |             |             |             |   |             |             |             |
|------|-------------|-------------|-------------|---|-------------|-------------|-------------|
| C    | 5.48402900  | -0.15409400 | 2.05700900  | H | -5.56630500 | -0.34338000 | -3.76929500 |
| C    | 5.61240100  | 0.85387600  | 1.09408100  | H | -6.48310700 | 1.52907400  | -2.39005800 |
| H    | 1.29959200  | 0.79013500  | -2.81951900 | H | -5.50839800 | 1.97033700  | -0.12758200 |
| H    | 2.93835100  | -1.45751600 | -1.55219600 | H | -3.66317300 | 0.58274900  | 0.71985200  |
| H    | 2.82064200  | -1.29864300 | -3.29578500 | C | -2.41703100 | -1.56338500 | -0.46870400 |
| H    | 1.22759200  | -2.92842100 | -2.59939500 | C | -1.46068000 | -0.67807200 | 0.41800700  |
| H    | -2.48976800 | -1.15896000 | -2.02107000 | O | -1.67186000 | -0.52096800 | 1.59618000  |
| H    | -4.58110600 | -2.40947800 | -2.44306400 | H | -0.84188700 | 1.05910100  | -1.30534600 |
| H    | -4.75846800 | -4.81476900 | -1.79286000 | C | -1.53814200 | -2.26210600 | -1.53036200 |
| H    | -2.81014300 | -5.95269000 | -0.72561900 | H | -2.16662000 | -2.72548800 | -2.30712800 |
| H    | -0.72038900 | -4.70381400 | -0.29348800 | H | -1.02216600 | -3.09558300 | -1.03833700 |
| H    | -0.21586700 | -2.55269300 | 2.01127000  | C | -3.08347500 | -2.68449200 | 0.39332100  |
| H    | 2.52582000  | -3.64299800 | -1.15428100 | H | -2.26950800 | -3.22897900 | 0.89632200  |
| H    | 3.84683600  | -4.95835600 | 0.44694400  | H | -3.54729800 | -3.38396000 | -0.32077400 |
| H    | 3.16380700  | -5.09326600 | 2.84284600  | C | -0.49954000 | -1.35115900 | -2.13285300 |
| H    | 1.10763600  | -3.89959700 | 3.61073800  | C | -0.80152500 | -0.07570300 | -2.61802300 |
| H    | 2.86115500  | 3.20439000  | 1.17410600  | H | 0.46134100  | -1.79610900 | -2.40531800 |
| H    | 2.54564300  | 5.65285000  | 1.07903400  | H | -0.04572400 | 0.45833700  | -3.20274100 |
| H    | 1.19708300  | 6.67815800  | -0.75504100 | H | -1.83146400 | 0.24775600  | -2.77344800 |
| H    | 0.17494500  | 5.21568600  | -2.50195300 | C | -4.10443200 | -2.26609900 | 1.40783100  |
| H    | 0.47324600  | 2.77150000  | -2.40959900 | C | -5.39659600 | -2.60564400 | 1.36150100  |
| H    | 4.62482700  | 2.02768400  | -0.41775200 | H | -3.73637700 | -1.65108200 | 2.23444900  |
| H    | 2.18697800  | -0.89281700 | 1.63611800  | H | -6.09994800 | -2.28903900 | 2.13821900  |
| H    | 4.13841000  | -1.56346300 | 3.00343100  | H | -5.80003600 | -3.21193300 | 0.54216800  |
| H    | 6.34707000  | -0.44596000 | 2.66054900  | P | 1.45763100  | -1.33414500 | 0.50111700  |
| H    | 6.57397600  | 1.35173700  | 0.94734000  | C | 1.80110500  | -0.93398400 | 2.29004400  |
| C    | 0.07100000  | -1.41463400 | -3.57379000 | C | 2.28376100  | 0.51972400  | 2.45551600  |
| H    | -0.72864500 | -2.14097400 | -3.77154700 | C | 1.23528800  | 1.64622900  | 2.40132300  |
| H    | -0.39617000 | -0.44037000 | -3.37764000 | P | 0.50718300  | 1.86148400  | 0.70620300  |
| H    | 0.67971500  | -1.32858000 | -4.48821400 | C | -0.71290800 | 3.21767300  | 0.89134400  |
| C    | 3.42217900  | 1.12437900  | -2.82816700 | C | -1.98859600 | 3.10142300  | 0.32728500  |
| H    | 4.34055600  | 0.71521700  | -2.38191000 | C | -2.91595500 | 4.14064500  | 0.45308100  |
| H    | 3.46485500  | 0.93116400  | -3.91221400 | C | -2.57086800 | 5.30505900  | 1.14307200  |
| H    | 3.41970500  | 2.21348900  | -2.67827100 | C | -1.29251000 | 5.43172400  | 1.70163900  |
| Co   | 0.00030200  | -0.08490700 | 0.46964600  | C | -0.36566200 | 4.39589500  | 1.57603900  |
|      |             |             |             | C | 1.82125000  | 2.64614500  | -0.31871700 |
|      |             |             |             | C | 1.50666400  | 2.92797500  | -1.66127100 |
| TS3s |             |             |             | C | 3.11054500  | 2.93658900  | 0.15189300  |
| C    | -3.51944000 | -0.66230900 | -1.04437000 | C | 4.07116500  | 3.47735300  | -0.70872300 |
| C    | -4.08905900 | -0.90934000 | -2.30358000 | C | 3.75496500  | 3.74163400  | -2.04353700 |
| C    | -5.14634000 | -0.12973200 | -2.78306600 | C | 2.46518500  | 3.47352900  | -2.51559900 |
| C    | -5.66090100 | 0.91627800  | -2.01249100 | C | 1.09013800  | -3.12483100 | 0.48013800  |
| C    | -5.11426500 | 1.16372500  | -0.75060900 | C | 1.53300400  | -3.92904900 | -0.58260300 |
| C    | -4.06268900 | 0.37798900  | -0.27216800 | C | 1.16454200  | -5.27508300 | -0.64976900 |
| H    | -3.70967300 | -1.71471900 | -2.93285100 |   |             |             |             |



|    |             |             |             |   |             |             |             |
|----|-------------|-------------|-------------|---|-------------|-------------|-------------|
| C  | 0.35293100  | -5.83357000 | 0.34236100  | C | -3.59763300 | -0.28220700 | -0.91198900 |
| C  | -0.08892500 | -5.03858100 | 1.40449000  | C | -4.41996000 | -0.51962600 | -2.02499200 |
| C  | 0.27253400  | -3.69108100 | 1.47269700  | C | -5.34867800 | 0.43392200  | -2.44959400 |
| C  | 3.02547500  | -1.16255400 | -0.43066100 | C | -5.47654800 | 1.64782300  | -1.76618600 |
| C  | 4.18991600  | -1.87614500 | -0.09536100 | C | -4.67357900 | 1.88985000  | -0.64955000 |
| C  | 3.05421300  | -0.28571300 | -1.52817900 | C | -3.74967700 | 0.93056500  | -0.22399600 |
| C  | 4.23279600  | -0.09509500 | -2.25445900 | H | -4.33976200 | -1.46098400 | -2.57091900 |
| C  | 5.39253200  | -0.78765000 | -1.89756400 | H | -5.97525800 | 0.22596400  | -3.32072200 |
| C  | 5.36618200  | -1.68384100 | -0.82271300 | H | -6.19962400 | 2.39612200  | -2.09991100 |
| H  | 0.81069400  | -1.04160400 | 2.75970400  | H | -4.76185600 | 2.83043700  | -0.10101600 |
| H  | 3.09873700  | 0.71025900  | 1.74076800  | H | -3.14264800 | 1.14137300  | 0.65659600  |
| H  | 2.74577700  | 0.58902400  | 3.45389800  | C | -2.65252300 | -1.37559900 | -0.40234800 |
| H  | 1.77205700  | 2.58499100  | 2.61049900  | C | -1.52606700 | -0.72476700 | 0.45554000  |
| H  | -2.25481900 | 2.19757600  | -0.21909500 | O | -1.60082900 | -0.66623200 | 1.65888100  |
| H  | -3.90844200 | 4.03437400  | 0.00871300  | H | -0.94642100 | 0.88754100  | -1.76627300 |
| H  | -3.29418000 | 6.11805600  | 1.24395400  | C | -1.87832800 | -2.12243800 | -1.50792200 |
| H  | -1.01565500 | 6.34451600  | 2.23489000  | H | -2.54140800 | -2.39531500 | -2.34585100 |
| H  | 0.63175100  | 4.51193700  | 2.00640800  | H | -1.51070900 | -3.06845300 | -1.08372700 |
| H  | 0.50498400  | 2.71773000  | -2.04122800 | C | -3.48703800 | -2.39719900 | 0.42981600  |
| H  | 3.38438600  | 2.74749600  | 1.18919500  | H | -2.77838100 | -3.09818000 | 0.89811600  |
| H  | 5.07295200  | 3.69193400  | -0.32888400 | H | -4.08466000 | -2.97483900 | -0.29376700 |
| H  | 4.50950900  | 4.15926600  | -2.71446200 | C | -0.69319700 | -1.30047800 | -1.96015500 |
| H  | 2.20517600  | 3.68591700  | -3.55543800 | C | -0.96127500 | 0.04062800  | -2.56008500 |
| H  | 2.16446200  | -3.50554000 | -1.36518600 | H | 0.06452600  | -1.89097200 | -2.48559400 |
| H  | 1.51498400  | -5.88931300 | -1.48282100 | H | -0.20254100 | 0.35770700  | -3.28837000 |
| H  | 0.06622800  | -6.88655100 | 0.28877600  | H | -1.97364500 | 0.19074800  | -2.96002600 |
| H  | -0.72463700 | -5.46597400 | 2.18350700  | C | -4.39162800 | -1.81890000 | 1.47688700  |
| H  | -0.09432200 | -3.08319000 | 2.30142600  | C | -5.72525900 | -1.90769100 | 1.45916000  |
| H  | 4.17784300  | -2.59682000 | 0.72226100  | H | -3.89575600 | -1.29292000 | 2.29888800  |
| H  | 2.15601400  | 0.25605600  | -1.82913200 | H | -6.33880100 | -1.47399900 | 2.25527900  |
| H  | 4.23924500  | 0.59608900  | -3.10001700 | H | -6.25407500 | -2.41712800 | 0.64535100  |
| H  | 6.31616400  | -0.63768500 | -2.46202000 | P | 1.31250200  | -1.43852100 | 0.48958400  |
| H  | 6.26639300  | -2.24056100 | -0.55120600 | C | 1.56935300  | -1.06614100 | 2.29822700  |
| C  | 0.14051200  | 1.48203700  | 3.46154100  | C | 2.08048200  | 0.36257800  | 2.58720200  |
| H  | -0.46578700 | 2.39396000  | 3.55479700  | C | 1.09803400  | 1.53648500  | 2.42747200  |
| H  | -0.53716500 | 0.65206000  | 3.22479200  | P | 0.60401400  | 1.75151900  | 0.64616900  |
| H  | 0.60925800  | 1.28688900  | 4.43960400  | C | -0.40024000 | 3.29003700  | 0.61050800  |
| C  | 2.77630900  | -1.88914600 | 2.98442000  | C | -1.42217400 | 3.41939500  | -0.34024000 |
| H  | 3.81402400  | -1.68608300 | 2.68260600  | C | -2.16540800 | 4.60062000  | -0.42764100 |
| H  | 2.71438500  | -1.73629400 | 4.07387600  | C | -1.89606000 | 5.66244100  | 0.43940300  |
| H  | 2.55691300  | -2.94574700 | 2.77915500  | C | -0.87558500 | 5.54212300  | 1.39032700  |
| Co | -0.00639900 | 0.06089800  | -0.47554300 | C | -0.12870200 | 4.36565800  | 1.47452500  |
|    |             |             |             | C | 2.16599000  | 2.27996100  | -0.17533700 |
|    |             |             |             | C | 2.35643200  | 1.89241000  | -1.51082700 |

3<sub>s</sub>

|   |             |             |             |                |             |             |             |
|---|-------------|-------------|-------------|----------------|-------------|-------------|-------------|
| C | 3.15891200  | 3.04091200  | 0.46221700  | C              | 2.40752400  | -2.12126300 | 3.03149500  |
| C | 4.32209900  | 3.39787500  | -0.22409400 | H              | 3.46723200  | -2.09333300 | 2.74241100  |
| C | 4.50407500  | 3.00631700  | -1.55495600 | H              | 2.35320600  | -1.92936900 | 4.11491300  |
| C | 3.51649600  | 2.25609800  | -2.19882500 | H              | 2.03675600  | -3.13944300 | 2.85335100  |
| C | 0.85511700  | -3.21328500 | 0.44418500  | Co             | -0.07453100 | -0.10709800 | -0.54049700 |
| C | 1.39778100  | -4.09601500 | -0.50145300 |                |             |             |             |
| C | 0.95053900  | -5.41908400 | -0.57049500 | 3 <sub>T</sub> |             |             |             |
| C | -0.03564400 | -5.87797800 | 0.30650400  | C              | -3.44796800 | -1.39919100 | -1.11151600 |
| C | -0.57164700 | -5.00621900 | 1.25974600  | C              | -3.99784700 | -1.88178200 | -2.30958500 |
| C | -0.13402100 | -3.68256600 | 1.32667300  | C              | -4.85589500 | -1.08937200 | -3.07445300 |
| C | 2.89819500  | -1.28823800 | -0.42522800 | C              | -5.18459600 | 0.20378000  | -2.65207600 |
| C | 4.12749300  | -1.01380100 | 0.19682100  | C              | -4.65285000 | 0.69003000  | -1.45595000 |
| C | 2.86579700  | -1.39608300 | -1.82862700 | C              | -3.79470100 | -0.10744500 | -0.69092600 |
| C | 4.02908300  | -1.25267600 | -2.58488600 | H              | -3.75415400 | -2.88924700 | -2.65302400 |
| C | 5.24495000  | -0.97301200 | -1.95587600 | H              | -5.27051800 | -1.48398300 | -4.00562800 |
| C | 5.28789700  | -0.85121300 | -0.56502600 | H              | -5.85558400 | 0.82552300  | -3.24995700 |
| H | 0.53849700  | -1.13521900 | 2.67761600  | H              | -4.90775000 | 1.69296000  | -1.10877000 |
| H | 2.98915300  | 0.57319700  | 2.00751300  | H              | -3.40120200 | 0.28652300  | 0.24851800  |
| H | 2.39632400  | 0.36686700  | 3.64338600  | C              | -2.57025600 | -2.30129100 | -0.25374800 |
| H | 1.66869100  | 2.44266200  | 2.68010200  | C              | -1.68372500 | -1.47479300 | 0.68866800  |
| H | -1.64355400 | 2.59509800  | -1.01823800 | O              | -1.67532400 | -1.57096000 | 1.89101300  |
| H | -2.96001400 | 4.68454100  | -1.17260600 | H              | -1.43234500 | -0.52463700 | -2.63804700 |
| H | -2.47942600 | 6.58432400  | 0.37628200  | C              | -1.43320400 | -2.97885700 | -1.05195200 |
| H | -0.65825700 | 6.37029400  | 2.06937000  | H              | -1.82647800 | -3.46668800 | -1.95897400 |
| H | 0.67031300  | 4.29266000  | 2.21469800  | H              | -1.01071200 | -3.77343400 | -0.41790900 |
| H | 1.59374200  | 1.29887800  | -2.01763800 | C              | -3.44128900 | -3.33399200 | 0.50852500  |
| H | 3.03678100  | 3.36003000  | 1.49857300  | H              | -2.76710700 | -3.90962200 | 1.16550300  |
| H | 5.09090000  | 3.98487600  | 0.28446200  | H              | -3.86021800 | -4.03319500 | -0.23225600 |
| H | 5.41672200  | 3.28394600  | -2.08798800 | C              | -0.34143000 | -1.96688000 | -1.37435800 |
| H | 3.65241500  | 1.94131600  | -3.23574000 | C              | -0.52982000 | -1.15422400 | -2.65088300 |
| H | 2.17281500  | -3.76097600 | -1.19049500 | H              | 0.63917900  | -2.45898500 | -1.38484800 |
| H | 1.38146400  | -6.09360400 | -1.31439100 | H              | 0.33724800  | -0.50433300 | -2.84835300 |
| H | -0.38322000 | -6.91231300 | 0.25059100  | H              | -0.62520800 | -1.83283000 | -3.52005200 |
| H | -1.34051900 | -5.35449100 | 1.95339800  | C              | -4.54666400 | -2.73335300 | 1.32636300  |
| H | -0.57604000 | -3.01724900 | 2.06820500  | C              | -5.85053700 | -2.89817400 | 1.08388100  |
| H | 4.20260000  | -0.92013900 | 1.27711800  | H              | -4.23049000 | -2.10724300 | 2.16851700  |
| H | 1.92578400  | -1.58921400 | -2.34180100 | H              | -6.61413300 | -2.43018300 | 1.71321300  |
| H | 3.97884500  | -1.34509200 | -3.67224200 | H              | -6.20249900 | -3.50774600 | 0.24372300  |
| H | 6.15456700  | -0.84493500 | -2.54737100 | P              | 2.06446400  | -0.80967400 | 0.48486600  |
| H | 6.23164800  | -0.63007800 | -0.06107900 | C              | 2.53830700  | -0.20584000 | 2.19181200  |
| C | -0.09227900 | 1.47201000  | 3.38771900  | C              | 2.23829400  | 1.27707300  | 2.48042100  |
| H | -0.71433100 | 2.37614600  | 3.31790600  | C              | 0.76929900  | 1.73602700  | 2.54651400  |
| H | -0.73447900 | 0.60706700  | 3.19181700  | P              | -0.06092700 | 1.77466200  | 0.88487900  |
| H | 0.28504100  | 1.40562700  | 4.42129200  | C              | -1.51862600 | 2.87512900  | 1.06121800  |

|   |             |             |             |                  |             |             |             |
|---|-------------|-------------|-------------|------------------|-------------|-------------|-------------|
| C | -2.34467100 | 3.01428900  | -0.06777800 | H                | 3.87584800  | -0.61782700 | -4.09566900 |
| C | -3.44113300 | 3.87737400  | -0.04043500 | H                | 5.44949400  | 1.27068500  | -3.64800700 |
| C | -3.73691300 | 4.59943600  | 1.12114500  | H                | 5.58523800  | 2.24315800  | -1.35227200 |
| C | -2.92348500 | 4.46105800  | 2.24876600  | C                | -0.06456100 | 0.90705200  | 3.52922100  |
| C | -1.81507700 | 3.60820000  | 2.22050500  | H                | -1.07170400 | 1.32560500  | 3.66732100  |
| C | 1.02045100  | 2.75632100  | -0.22065500 | H                | -0.19169300 | -0.12783700 | 3.18423300  |
| C | 1.15812800  | 2.32642700  | -1.54848200 | H                | 0.43212700  | 0.88980700  | 4.51282000  |
| C | 1.67536300  | 3.92392400  | 0.20157900  | C                | 3.97032600  | -0.57081600 | 2.59675500  |
| C | 2.46631500  | 4.64259900  | -0.69767700 | H                | 4.72046000  | 0.02085800  | 2.05297800  |
| C | 2.59417200  | 4.21214300  | -2.02400200 | H                | 4.10525500  | -0.37066100 | 3.67195500  |
| C | 1.93497600  | 3.05637800  | -2.45089400 | H                | 4.18487100  | -1.63480100 | 2.42391000  |
| C | 2.42976400  | -2.60194200 | 0.60816100  | Co               | -0.24091700 | -0.38921600 | -0.07777600 |
| C | 3.59411300  | -3.18891800 | 0.09143300  |                  |             |             |             |
| C | 3.81366300  | -4.56202800 | 0.23891800  | TS4 <sub>T</sub> |             |             |             |
| C | 2.87847900  | -5.35776500 | 0.90732100  | C                | -3.39815900 | -1.47670800 | -0.65290500 |
| C | 1.71853800  | -4.77619700 | 1.43080100  | C                | -4.41127100 | -1.16691900 | -1.57278800 |
| C | 1.49176300  | -3.40689100 | 1.27795900  | C                | -5.54205200 | -0.44998300 | -1.17238000 |
| C | 3.22922000  | -0.16010300 | -0.76683200 | C                | -5.67310700 | -0.02429300 | 0.15375700  |
| C | 4.11337800  | 0.90273200  | -0.52665900 | C                | -4.66628900 | -0.32191900 | 1.07506500  |
| C | 3.15116700  | -0.69557200 | -2.06699300 | C                | -3.54058100 | -1.04755500 | 0.67517400  |
| C | 3.94802900  | -0.18778000 | -3.09377200 | H                | -4.32085300 | -1.49769800 | -2.61035000 |
| C | 4.82987800  | 0.86905200  | -2.84265200 | H                | -6.32263200 | -0.21806600 | -1.90143600 |
| C | 4.90765900  | 1.41136700  | -1.55814000 | H                | -6.55160300 | 0.54636600  | 0.46366500  |
| H | 1.85561100  | -0.81611700 | 2.80561600  | H                | -4.75287700 | 0.01502200  | 2.11090600  |
| H | 2.79689900  | 1.92673100  | 1.79290200  | H                | -2.76640400 | -1.28382700 | 1.40490600  |
| H | 2.65730600  | 1.47840100  | 3.48063400  | C                | -2.22750400 | -2.34507100 | -1.06913600 |
| H | 0.79874300  | 2.78113600  | 2.89277100  | C                | -0.92032000 | -2.02911000 | -0.32773900 |
| H | -2.12320500 | 2.45057000  | -0.97734900 | O                | -0.52372200 | -2.49385900 | 0.72438700  |
| H | -4.06864300 | 3.98397100  | -0.92832700 | H                | 0.55688900  | -1.06899000 | -3.82062700 |
| H | -4.59939000 | 5.26992900  | 1.14532200  | C                | -1.58843300 | -2.03366500 | -2.44367800 |
| H | -3.14621400 | 5.02387700  | 3.15864000  | H                | -1.93638900 | -1.07412100 | -2.85125900 |
| H | -1.18627900 | 3.53110600  | 3.10813700  | H                | -1.74503000 | -2.81601200 | -3.19974800 |
| H | 0.66138300  | 1.40822400  | -1.86888700 | C                | -2.59608100 | -3.85269400 | -0.93697700 |
| H | 1.56823600  | 4.27594200  | 1.23020300  | H                | -1.71242500 | -4.43705400 | -1.24852000 |
| H | 2.98165400  | 5.54660800  | -0.36394300 | H                | -3.39825900 | -4.05275600 | -1.66503900 |
| H | 3.21335000  | 4.77858500  | -2.72387900 | C                | -0.13300200 | -1.91639000 | -1.96915800 |
| H | 2.03831200  | 2.71180300  | -3.48202000 | C                | 0.74667300  | -0.93373700 | -2.74147100 |
| H | 4.33524000  | -2.57703900 | -0.42513400 | H                | 0.37398000  | -2.88933500 | -1.90223400 |
| H | 4.72318600  | -5.00999900 | -0.16898900 | H                | 0.49612300  | 0.13941400  | -2.56240300 |
| H | 3.05260200  | -6.43068800 | 1.01997100  | H                | 1.81777800  | -1.07798100 | -2.55893800 |
| H | 0.98246800  | -5.39156400 | 1.95388700  | C                | -3.02791200 | -4.28378900 | 0.43293700  |
| H | 0.57902400  | -2.96331600 | 1.68088100  | C                | -4.26091000 | -4.69564900 | 0.74344600  |
| H | 4.18415400  | 1.35640500  | 0.45914600  | H                | -2.26152800 | -4.23205300 | 1.21326800  |
| H | 2.46571700  | -1.51784000 | -2.28014700 | H                | -4.52425100 | -4.99775400 | 1.76203100  |

|   |             |             |             |    |             |             |             |
|---|-------------|-------------|-------------|----|-------------|-------------|-------------|
| H | -5.05437300 | -4.74424400 | -0.01118800 | H  | 3.64917700  | -2.14408800 | -1.55393800 |
| P | 2.09764300  | -0.69474400 | 0.45304100  | H  | 4.25637900  | -4.52313900 | -1.83597100 |
| C | 2.01265200  | -0.27082400 | 2.27192300  | H  | 3.64417500  | -6.19354000 | -0.08166200 |
| C | 1.52289300  | 1.17524000  | 2.50326800  | H  | 2.40552700  | -5.44633000 | 1.95317600  |
| C | 0.02688000  | 1.51814200  | 2.29576900  | H  | 1.76884800  | -3.08007800 | 2.22679000  |
| P | -0.43596500 | 1.73643300  | 0.50941100  | H  | 5.09023100  | -0.84650900 | 0.78718400  |
| C | -2.14339700 | 2.40730000  | 0.47336900  | H  | 2.20272000  | 1.50831400  | -1.37876900 |
| C | -2.87377500 | 2.25037500  | -0.71571700 | H  | 4.02586700  | 2.93231900  | -2.28296600 |
| C | -4.14276100 | 2.81792000  | -0.84478300 | H  | 6.39797100  | 2.46182500  | -1.64699700 |
| C | -4.70194100 | 3.53127500  | 0.21981600  | H  | 6.91634300  | 0.56190600  | -0.11754600 |
| C | -3.98397400 | 3.68149300  | 1.41056200  | C  | -0.90622200 | 0.49072100  | 2.94604400  |
| C | -2.70526500 | 3.13090300  | 1.53626800  | H  | -1.95165300 | 0.82835600  | 2.93921800  |
| C | 0.50588300  | 3.18554400  | -0.11564800 | H  | -0.86184300 | -0.47959400 | 2.43124700  |
| C | 0.52690000  | 3.39056700  | -1.50606700 | H  | -0.60931100 | 0.33212700  | 3.99537700  |
| C | 1.17732500  | 4.09028200  | 0.71905300  | C  | 3.32167600  | -0.50058300 | 3.03085300  |
| C | 1.87624400  | 5.16953300  | 0.16806100  | H  | 4.07406500  | 0.25736200  | 2.76598900  |
| C | 1.89850800  | 5.36385300  | -1.21546500 | H  | 3.13818400  | -0.42254000 | 4.11488500  |
| C | 1.21398300  | 4.47542800  | -2.05266200 | H  | 3.75042200  | -1.49305800 | 2.83266800  |
| C | 2.67456700  | -2.43183500 | 0.36356400  | Co | -0.01792800 | -0.27932700 | -0.54952600 |
| C | 3.36994800  | -2.86268100 | -0.78070000 |    |             |             |             |
| C | 3.71499100  | -4.20719400 | -0.94065000 | 4s |             |             |             |
| C | 3.37226100  | -5.14220800 | 0.04102400  | C  | -1.97032600 | 2.25036300  | 0.77625800  |
| C | 2.67888900  | -4.72294100 | 1.18084200  | C  | -3.35422200 | 2.00493500  | 0.85724500  |
| C | 2.32603400  | -3.38033600 | 1.33957200  | C  | -4.15552300 | 2.06951500  | -0.27701800 |
| C | 3.51249900  | 0.26223600  | -0.20887400 | C  | -3.59058500 | 2.34446700  | -1.53211900 |
| C | 4.85036400  | -0.00956300 | 0.13007000  | C  | -2.22595500 | 2.59021500  | -1.63344900 |
| C | 3.23405000  | 1.31585600  | -1.09124700 | C  | -1.41416500 | 2.56269400  | -0.48455200 |
| C | 4.26349500  | 2.11091200  | -1.60298300 | H  | -3.80226400 | 1.77526900  | 1.82514300  |
| C | 5.58852000  | 1.84574600  | -1.24735600 | H  | -5.22765200 | 1.88162900  | -0.19311000 |
| C | 5.87973300  | 0.77994800  | -0.38649300 | H  | -4.22296100 | 2.37175500  | -2.42222300 |
| H | 1.25602400  | -0.97001900 | 2.65784300  | H  | -1.77863700 | 2.83330000  | -2.59907300 |
| H | 2.16058800  | 1.86656500  | 1.93086200  | H  | -0.38251400 | 2.90681200  | -0.56095500 |
| H | 1.72772000  | 1.39893800  | 3.56335200  | C  | -1.09956700 | 2.27608100  | 2.01007200  |
| H | -0.13435800 | 2.49184400  | 2.78425000  | C  | 0.19138900  | 1.44280500  | 1.87920200  |
| H | -2.44891200 | 1.67723100  | -1.54331900 | O  | 1.19866300  | 1.72137100  | 1.15564700  |
| H | -4.70237300 | 2.68838400  | -1.77354100 | H  | 0.14298100  | -0.74454600 | 4.72438800  |
| H | -5.70018600 | 3.96529700  | 0.12409000  | C  | -1.45592300 | 1.36130800  | 3.21621700  |
| H | -4.41757500 | 4.23707500  | 2.24579600  | H  | -2.14042800 | 0.55035200  | 2.93324800  |
| H | -2.14919200 | 3.27461300  | 2.46461600  | H  | -1.84028100 | 1.87497200  | 4.10733800  |
| H | 0.00964200  | 2.68986300  | -2.16644500 | C  | -0.81484100 | 3.73442600  | 2.47857300  |
| H | 1.16419600  | 3.96624100  | 1.80244300  | H  | -0.23048600 | 3.67130100  | 3.41276500  |
| H | 2.40383300  | 5.86270000  | 0.82785900  | H  | -1.78660200 | 4.19167400  | 2.72880400  |
| H | 2.44769000  | 6.20662800  | -1.64216200 | C  | 0.01199200  | 0.85008300  | 3.27712800  |
| H | 1.22422300  | 4.62199300  | -3.13537500 | C  | 0.27256700  | -0.59808900 | 3.63988900  |

|   |             |             |             |                |             |             |             |
|---|-------------|-------------|-------------|----------------|-------------|-------------|-------------|
| H | 0.60833300  | 1.50558100  | 3.93927400  | H              | -5.95836000 | -1.08806800 | -2.42652700 |
| H | -0.43275100 | -1.26507800 | 3.12795000  | H              | -3.51996400 | -0.98972000 | -2.77210900 |
| H | 1.29619200  | -0.90539000 | 3.37952900  | H              | 0.52999100  | -1.93147900 | 1.40965600  |
| C | -0.07367400 | 4.59454300  | 1.50016700  | H              | -2.26123000 | -3.76930800 | -1.30531800 |
| C | -0.56246900 | 5.70329600  | 0.93546200  | H              | -1.83782400 | -5.97187100 | -0.25130000 |
| H | 0.93861300  | 4.26232400  | 1.24374200  | H              | -0.25282500 | -6.16209500 | 1.66715300  |
| H | 0.03060900  | 6.29561800  | 0.23149800  | H              | 0.93203400  | -4.12650400 | 2.50284900  |
| H | -1.57517300 | 6.05955100  | 1.15653800  | H              | 4.84549900  | 0.36478500  | -0.40501600 |
| P | 1.90110300  | -0.24053700 | -0.73303400 | H              | 6.18711700  | 2.35109900  | -1.01833400 |
| C | 1.80040000  | -0.99035000 | -2.44709900 | H              | 5.09468000  | 4.33201400  | -2.07047300 |
| C | 0.63828500  | -1.96418300 | -2.68780100 | H              | 2.63674700  | 4.29820100  | -2.51875700 |
| C | -0.78383700 | -1.37817400 | -2.56917100 | H              | 1.29029000  | 2.31231500  | -1.90162400 |
| P | -1.20872000 | -1.06277000 | -0.78302000 | H              | 2.62112500  | -3.15790400 | -0.71301900 |
| C | -3.03971000 | -1.05794700 | -0.65619800 | H              | 3.21096800  | 0.33526300  | 1.76119800  |
| C | -3.57844300 | -1.13969500 | 0.63965000  | H              | 4.45151100  | -1.04861100 | 3.40716900  |
| C | -4.95749500 | -1.20668900 | 0.83196400  | H              | 4.79230400  | -3.48657800 | 2.98708600  |
| C | -5.82018300 | -1.18476300 | -0.27004700 | H              | 3.86564800  | -4.52590700 | 0.91591100  |
| C | -5.29223700 | -1.10215200 | -1.56039800 | C              | -0.97080800 | -0.12431300 | -3.42757900 |
| C | -3.90757300 | -1.04178200 | -1.75518400 | H              | -2.01024000 | 0.22715800  | -3.43101000 |
| C | -0.88186200 | -2.70012800 | -0.01087200 | H              | -0.34900200 | 0.70771700  | -3.06884500 |
| C | 0.01037100  | -2.81627200 | 1.05622600  | H              | -0.68152500 | -0.33997000 | -4.46921900 |
| C | -1.55079600 | -3.84636800 | -0.47893000 | C              | 3.13154500  | -1.54184300 | -2.96715200 |
| C | -1.31758600 | -5.08469100 | 0.11828600  | H              | 3.37038600  | -2.52708900 | -2.54521800 |
| C | -0.42653500 | -5.19133900 | 1.19607900  | H              | 3.06598900  | -1.65791500 | -4.06096400 |
| C | 0.23435800  | -4.05583200 | 1.66558600  | H              | 3.97052400  | -0.86405900 | -2.75313300 |
| C | 2.97234100  | 1.20556200  | -1.10092600 | Co             | -0.03386000 | 0.63293600  | 0.02378200  |
| C | 4.35288200  | 1.22372700  | -0.86217300 |                |             |             |             |
| C | 5.11136100  | 2.34700600  | -1.21055100 | 4 <sub>T</sub> |             |             |             |
| C | 4.49994200  | 3.45534800  | -1.80221300 | C              | -2.35306600 | 2.37362500  | 0.60582000  |
| C | 3.12303100  | 3.43741300  | -2.05334700 | C              | -3.74366300 | 2.20348000  | 0.63752100  |
| C | 2.36456600  | 2.31955400  | -1.70439200 | C              | -4.47735700 | 2.10656800  | -0.54784800 |
| C | 2.87292500  | -1.30273400 | 0.38588400  | C              | -3.83077500 | 2.17521900  | -1.78618300 |
| C | 3.04696500  | -2.67759500 | 0.16636900  | C              | -2.44619900 | 2.35872500  | -1.83047800 |
| C | 3.37460600  | -0.72570300 | 1.56756900  | C              | -1.71411700 | 2.46394600  | -0.64381000 |
| C | 4.06458700  | -1.50813500 | 2.49449400  | H              | -4.25803300 | 2.13360100  | 1.59839100  |
| C | 4.25270500  | -2.87486700 | 2.25996800  | H              | -5.55917500 | 1.96089100  | -0.50361800 |
| C | 3.73926900  | -3.45609700 | 1.09765100  | H              | -4.40413300 | 2.08695300  | -2.71201200 |
| H | 1.58920800  | -0.07713800 | -3.02376800 | H              | -1.93112800 | 2.42349700  | -2.79082500 |
| H | 0.74123800  | -2.85160100 | -2.04616700 | H              | -0.63571300 | 2.63519400  | -0.68934400 |
| H | 0.74484100  | -2.32500900 | -3.72473100 | C              | -1.54202900 | 2.48687300  | 1.87453700  |
| H | -1.48177600 | -2.15932000 | -2.90956500 | C              | -0.21647700 | 1.70170200  | 1.91754300  |
| H | -2.91332300 | -1.15902700 | 1.50616500  | O              | 0.87036100  | 1.88632100  | 1.30548100  |
| H | -5.36082200 | -1.27233900 | 1.84538500  | H              | -0.70532700 | -0.76180000 | 4.42490000  |
| H | -6.90164500 | -1.23441000 | -0.12139800 | C              | -1.97979300 | 1.62468300  | 3.10184800  |

|   |             |             |             |     |             |             |             |
|---|-------------|-------------|-------------|-----|-------------|-------------|-------------|
| H | -2.69032100 | 0.83462000  | 2.82580000  | H   | 1.67301900  | -0.00479500 | -3.03216300 |
| H | -2.37818600 | 2.19253100  | 3.95268600  | H   | 1.26171400  | -2.80309000 | -1.83801400 |
| C | -1.31144300 | 3.97792200  | 2.26449500  | H   | 1.17279600  | -2.43238000 | -3.55267800 |
| H | -0.78332300 | 3.99027900  | 3.23388200  | H   | -1.02448400 | -2.52622800 | -2.83548200 |
| H | -2.30118900 | 4.43739800  | 2.42039700  | H   | -2.93921800 | -0.90561100 | 1.36443400  |
| C | -0.53602000 | 1.06809100  | 3.26634900  | H   | -5.40990700 | -0.98970900 | 1.52855600  |
| C | -0.33701700 | -0.42723200 | 3.44176800  | H   | -6.77694600 | -1.58016900 | -0.47684900 |
| H | 0.02294800  | 1.62148200  | 4.04233600  | H   | -5.64248600 | -2.11094000 | -2.63414000 |
| H | -0.88293500 | -0.98374800 | 2.66503900  | H   | -3.18256900 | -2.07191600 | -2.79375600 |
| H | 0.72895700  | -0.69462800 | 3.37075900  | H   | 0.79867200  | -2.15765300 | 1.43449800  |
| C | -0.51993400 | 4.76358100  | 1.26194200  | H   | -2.01436100 | -4.21516900 | -1.11118300 |
| C | -0.98948400 | 5.79725100  | 0.55658300  | H   | -1.42334400 | -6.36469000 | -0.02277300 |
| H | 0.51371500  | 4.43390200  | 1.10612500  | H   | 0.26851100  | -6.41899500 | 1.80950700  |
| H | -0.36058500 | 6.33122600  | -0.16285900 | H   | 1.38233000  | -4.30507700 | 2.53566600  |
| H | -2.02156700 | 6.14731200  | 0.67251000  | H   | 4.98928600  | 0.68357700  | -0.41617700 |
| P | 2.07754900  | -0.03270700 | -0.74451400 | H   | 6.23575500  | 2.76256600  | -0.93510600 |
| C | 2.03852000  | -0.84763600 | -2.42430800 | H   | 5.04475500  | 4.73467900  | -1.89215200 |
| C | 1.02175900  | -1.99854400 | -2.54994100 | H   | 2.58852700  | 4.61060200  | -2.32445100 |
| C | -0.47988900 | -1.64537300 | -2.45874000 | H   | 1.33538800  | 2.53888100  | -1.78951100 |
| P | -1.04932900 | -1.43620000 | -0.69628600 | H   | 3.21544000  | -2.86257400 | -0.70514900 |
| C | -2.88256700 | -1.47592800 | -0.72422100 | H   | 3.01346200  | 0.60668300  | 1.86608700  |
| C | -3.53035700 | -1.17847600 | 0.48719600  | H   | 4.17862300  | -0.65875000 | 3.65272200  |
| C | -4.92160500 | -1.22573300 | 0.58002800  | H   | 4.86029400  | -3.03149400 | 3.26663300  |
| C | -5.68653300 | -1.55454100 | -0.54366200 | H   | 4.36420200  | -4.11650600 | 1.07484000  |
| C | -5.05090400 | -1.84911500 | -1.75339900 | C   | -0.85533300 | -0.42356000 | -3.29903000 |
| C | -3.65551400 | -1.81821500 | -1.84455300 | H   | -1.94220100 | -0.27848500 | -3.35187000 |
| C | -0.63989800 | -3.04109900 | 0.09046100  | H   | -0.42283100 | 0.49749900  | -2.88440400 |
| C | 0.31206800  | -3.07837300 | 1.11802000  | H   | -0.47872000 | -0.54482100 | -4.32782600 |
| C | -1.26356800 | -4.23267600 | -0.31771900 | C   | 3.41118300  | -1.23329900 | -2.98343300 |
| C | -0.93380000 | -5.44152800 | 0.29732100  | H   | 3.83070900  | -2.12251400 | -2.49363500 |
| C | 0.01690000  | -5.47165800 | 1.32613100  | H   | 3.31598800  | -1.46218600 | -4.05740600 |
| C | 0.63899900  | -4.28985600 | 1.73546400  | H   | 4.13714800  | -0.41371700 | -2.87963100 |
| C | 3.07804000  | 1.46605600  | -1.07283500 | Co  | -0.01350200 | 0.38965800  | 0.26301900  |
| C | 4.45823800  | 1.54125700  | -0.83313500 |     |             |             |             |
| C | 5.16074200  | 2.71435100  | -1.12622000 | l's |             |             |             |
| C | 4.49344700  | 3.81900600  | -1.66427500 | C   | -4.22586600 | 0.96760400  | -0.22907400 |
| C | 3.11704500  | 3.74971900  | -1.90758800 | C   | -4.75064300 | 0.20201100  | -1.28273800 |
| C | 2.41214800  | 2.58211600  | -1.60750600 | C   | -5.93963200 | -0.51904400 | -1.13355800 |
| C | 3.07219700  | -1.01945700 | 0.43360000  | C   | -6.63688500 | -0.48859500 | 0.07547500  |
| C | 3.44277600  | -2.35761100 | 0.23198500  | C   | -6.13545600 | 0.27982700  | 1.13078000  |
| C | 3.33415700  | -0.42117100 | 1.68277900  | C   | -4.94903900 | 1.00102900  | 0.97760100  |
| C | 3.97938900  | -1.13803200 | 2.69097800  | H   | -4.23727000 | 0.15438800  | -2.24222300 |
| C | 4.35967100  | -2.46830600 | 2.47525400  | H   | -6.31714500 | -1.11036500 | -1.97164300 |
| C | 4.08586700  | -3.07399700 | 1.24690400  | H   | -7.56336800 | -1.05577800 | 0.19482500  |

|   |             |             |             |                |             |             |             |
|---|-------------|-------------|-------------|----------------|-------------|-------------|-------------|
| H | -6.67243400 | 0.32201200  | 2.08193000  | C              | -2.58012100 | -2.20753000 | 0.90516100  |
| H | -4.58258200 | 1.59786900  | 1.81207400  | C              | 1.41495500  | -2.80369100 | -0.24503400 |
| C | -2.95802200 | 1.80887900  | -0.38800100 | C              | 1.58783400  | -4.10056700 | 0.27075200  |
| C | -1.98040400 | 1.62660300  | 0.77676800  | C              | 2.25731200  | -2.35769400 | -1.27384800 |
| O | -2.18219400 | 1.03977600  | 1.81855000  | C              | 3.27922500  | -3.17672800 | -1.76048700 |
| H | -0.99577300 | 2.13524100  | 0.61310900  | C              | 3.46371200  | -4.45373400 | -1.22447600 |
| C | -2.15486700 | 1.48043200  | -1.66871000 | C              | 2.61161100  | -4.91655800 | -0.21443500 |
| H | -1.35433200 | 2.22885500  | -1.78411700 | H              | -0.42289100 | -0.75397900 | 2.48702900  |
| H | -2.80731300 | 1.63095600  | -2.54675000 | H              | 2.50222200  | -1.58778600 | 2.12639800  |
| C | -3.39348100 | 3.32023500  | -0.41875200 | H              | 1.85185200  | -1.10338000 | 3.68418100  |
| H | -3.95184600 | 3.52352800  | 0.50973000  | H              | 3.03297800  | 0.74779500  | 2.71603300  |
| H | -4.10289800 | 3.42542300  | -1.25425300 | H              | 0.65066100  | 2.86955600  | -1.08735300 |
| C | -1.56025400 | 0.09213900  | -1.65270800 | H              | 0.89505500  | 5.32590800  | -1.37697900 |
| C | -0.43211400 | -0.28742600 | -2.39500000 | H              | 2.62505400  | 6.56920200  | -0.07651700 |
| H | -2.22487700 | -0.69432200 | -1.29294700 | H              | 4.11805600  | 5.34046600  | 1.49844200  |
| H | -0.25947300 | -1.33983400 | -2.64179200 | H              | 3.89214300  | 2.88227900  | 1.77025400  |
| H | 0.06646100  | 0.43211600  | -3.06049600 | H              | 3.23542100  | 1.13268600  | -2.07410300 |
| C | -2.29078300 | 4.32944200  | -0.56051800 | H              | 4.39447100  | -0.63092300 | 1.70392800  |
| C | -2.14331200 | 5.13707000  | -1.61570900 | H              | 6.49379600  | -1.42068900 | 0.68786700  |
| H | -1.58104400 | 4.40943500  | 0.27141200  | H              | 6.99541100  | -0.94565800 | -1.70897000 |
| H | -1.34058600 | 5.87892600  | -1.66280400 | H              | 5.36034900  | 0.35114400  | -3.08225700 |
| H | -2.83008600 | 5.09029800  | -2.46863200 | H              | -0.71151800 | -3.84201900 | -1.44353500 |
| P | 0.12431100  | -1.66579100 | 0.37531500  | H              | -2.90218800 | -4.91632600 | -1.86617800 |
| C | 0.34245600  | -1.50175800 | 2.22649500  | H              | -4.89876500 | -4.27057300 | -0.51458800 |
| C | 1.73431700  | -0.95534800 | 2.59791500  | H              | -4.68169900 | -2.52483200 | 1.25613500  |
| C | 2.02130400  | 0.53579300  | 2.33597200  | H              | -2.51533300 | -1.42158000 | 1.65897500  |
| P | 2.04540300  | 0.90301900  | 0.51721500  | H              | 0.91562500  | -4.48269300 | 1.03881300  |
| C | 2.24622100  | 2.71762200  | 0.36686400  | H              | 2.10798300  | -1.36182500 | -1.68687300 |
| C | 1.40976400  | 3.41264400  | -0.51846800 | H              | 3.93252300  | -2.81082700 | -2.55545100 |
| C | 1.54845100  | 4.79492300  | -0.68189100 | H              | 4.26588800  | -5.09476400 | -1.59858500 |
| C | 2.51830400  | 5.48858400  | 0.04628900  | H              | 2.74229900  | -5.92112000 | 0.19524800  |
| C | 3.35712500  | 4.79865400  | 0.93127300  | C              | 1.03120000  | 1.45357800  | 3.06022800  |
| C | 3.22777100  | 3.41766500  | 1.08736600  | H              | 1.33519800  | 2.50756500  | 2.99547000  |
| C | 3.65962300  | 0.30438000  | -0.11557700 | H              | 0.00946100  | 1.36769200  | 2.66270500  |
| C | 3.95200400  | 0.57587500  | -1.46436700 | H              | 0.99612800  | 1.17866400  | 4.12708100  |
| C | 4.58671200  | -0.41132000 | 0.65384400  | C              | 0.06310200  | -2.78095800 | 3.02264300  |
| C | 5.78116800  | -0.85951200 | 0.07849800  | H              | 0.89964000  | -3.49058500 | 2.94657200  |
| C | 6.06289900  | -0.59187600 | -1.26272500 | H              | -0.04998600 | -2.52049400 | 4.08733200  |
| C | 5.14588000  | 0.13388900  | -2.03308000 | H              | -0.85481500 | -3.29125900 | 2.70198200  |
| C | -1.44861900 | -2.57623400 | 0.15485400  | Co             | 0.14485800  | 0.26874200  | -0.57824300 |
| C | -1.57687000 | -3.55239000 | -0.84494600 |                |             |             |             |
| C | -2.81444200 | -4.15844300 | -1.08374300 | I <sub>T</sub> |             |             |             |
| C | -3.93183300 | -3.79773200 | -0.32619300 | C              | 2.23868800  | -1.65783200 | 0.69201000  |
| C | -3.81027600 | -2.82224500 | 0.66954700  | O              | 2.25482200  | -2.22881000 | 1.75526700  |

|   |             |             |             |    |             |             |             |
|---|-------------|-------------|-------------|----|-------------|-------------|-------------|
| H | 1.92960200  | -0.57283500 | 0.65851600  | H  | 2.15041900  | 3.21222500  | -0.60440300 |
| P | 0.01221300  | 1.83902200  | 0.87214000  | H  | 4.55942100  | 3.53393200  | -0.14486700 |
| C | -1.00498100 | 1.95611500  | 2.43110500  | H  | 5.53305300  | 2.80299800  | 2.03464800  |
| C | -2.44763300 | 1.46246300  | 2.18660300  | H  | 4.06248500  | 1.74083500  | 3.74987200  |
| C | -2.69652200 | -0.05669500 | 2.03561500  | H  | 1.65804900  | 1.40338100  | 3.29551800  |
| P | -2.25955500 | -0.71945000 | 0.34349100  | H  | 0.36529300  | 4.82944000  | 0.81575900  |
| C | -2.70339500 | -2.49437200 | 0.44312800  | H  | -1.70263700 | 1.77715100  | -1.42640700 |
| C | -1.66651700 | -3.41900000 | 0.64967300  | H  | -2.70962900 | 3.51730800  | -2.88239700 |
| C | -1.94776500 | -4.78250000 | 0.76713400  | H  | -2.16518600 | 5.92731600  | -2.49733200 |
| C | -3.26871200 | -5.23224200 | 0.67198200  | H  | -0.62027500 | 6.56814800  | -0.64829600 |
| C | -4.30605000 | -4.31588200 | 0.46256500  | C  | -1.96449800 | -0.88254500 | 3.09826800  |
| C | -4.02688700 | -2.95127400 | 0.34843000  | H  | -2.33545500 | -1.91647800 | 3.13166300  |
| C | -3.48663500 | -0.02420700 | -0.82238200 | H  | -0.87904200 | -0.92241800 | 2.91023700  |
| C | -3.24054500 | -0.21028000 | -2.19439900 | H  | -2.11670400 | -0.43552800 | 4.09386800  |
| C | -4.62225700 | 0.69698200  | -0.42427700 | C  | -1.00731700 | 3.34972600  | 3.06097100  |
| C | -5.48844400 | 1.23233200  | -1.38351600 | H  | -1.57720500 | 4.06496900  | 2.44847400  |
| C | -5.23541000 | 1.04582900  | -2.74506500 | H  | -1.48226100 | 3.30829900  | 4.05485800  |
| C | -4.11122300 | 0.31620100  | -3.14927200 | H  | 0.01144800  | 3.74462200  | 3.18983200  |
| C | 1.72366400  | 2.30481100  | 1.31957100  | Co | -0.02410700 | -0.30267300 | 0.02534100  |
| C | 2.56092300  | 2.89617500  | 0.35641300  | C  | 3.77104200  | -1.32790600 | -1.21191800 |
| C | 3.92153900  | 3.07597200  | 0.61493600  | C  | 3.98557600  | -1.20359600 | -2.59359100 |
| C | 4.46773100  | 2.66463800  | 1.83519000  | C  | 5.01900700  | -0.40561700 | -3.08794700 |
| C | 3.64386300  | 2.06865500  | 2.79511200  | C  | 5.85843400  | 0.28912000  | -2.20984900 |
| C | 2.28185100  | 1.88532400  | 2.53969100  | C  | 5.65955700  | 0.16889900  | -0.83299000 |
| C | -0.61511500 | 3.18069300  | -0.20068600 | C  | 4.62800300  | -0.63712000 | -0.34057300 |
| C | -0.31000000 | 4.53657500  | 0.01012000  | H  | 3.33755900  | -1.72773500 | -3.29747600 |
| C | -1.47574700 | 2.82758700  | -1.25186100 | H  | 5.16625000  | -0.32203100 | -4.16772700 |
| C | -2.03786900 | 3.80971300  | -2.07177600 | H  | 6.66249700  | 0.91889200  | -2.59840600 |
| C | -1.73236700 | 5.15630100  | -1.85496700 | H  | 6.30609100  | 0.70398700  | -0.13368900 |
| C | -0.86472700 | 5.51639500  | -0.81678900 | H  | 4.49842400  | -0.71883700 | 0.74136800  |
| H | -0.50450600 | 1.26148900  | 3.12226300  | C  | 2.66557000  | -2.23402300 | -0.65367900 |
| H | -2.88005900 | 2.01063900  | 1.33412000  | C  | 3.25366100  | -3.66576000 | -0.45697300 |
| H | -3.03290600 | 1.77704500  | 3.06697100  | H  | 3.98500400  | -3.61625300 | 0.36313700  |
| H | -3.77848500 | -0.22058000 | 2.16192200  | H  | 3.81133100  | -3.90623900 | -1.37598900 |
| H | -0.63489800 | -3.06681900 | 0.72504500  | C  | 1.41320000  | -2.30148200 | -1.57158500 |
| H | -1.13177900 | -5.49101300 | 0.92758300  | H  | 0.71633500  | -3.02840100 | -1.12983200 |
| H | -3.49113400 | -6.29873200 | 0.75830100  | H  | 1.71930700  | -2.76282800 | -2.52695600 |
| H | -5.33845200 | -4.66646200 | 0.38700600  | C  | 2.25750600  | -4.76703500 | -0.20391200 |
| H | -4.84022900 | -2.24069600 | 0.18337100  | C  | 2.02358300  | -5.34539600 | 0.97827400  |
| H | -2.35550700 | -0.76467300 | -2.51383300 | H  | 1.70656800  | -5.12732400 | -1.08055400 |
| H | -4.84425200 | 0.84907700  | 0.63242400  | H  | 1.30674600  | -6.16671400 | 1.07744300  |
| H | -6.36644400 | 1.79746100  | -1.06124800 | H  | 2.53842400  | -5.01710000 | 1.88647500  |
| H | -5.91273100 | 1.46777900  | -3.49155100 | C  | 0.62661600  | -1.04460700 | -1.88866700 |
| H | -3.90790300 | 0.16381800  | -4.21200900 | C  | 1.03843300  | 0.26480400  | -1.78409000 |



|                   |             |             |             |    |             |             |             |
|-------------------|-------------|-------------|-------------|----|-------------|-------------|-------------|
| H                 | -0.26887100 | -1.25143300 | -2.48421300 | H  | -5.60662400 | -4.08118600 | -0.23429500 |
| H                 | 0.47351300  | 1.05622400  | -2.28158200 | H  | -4.76573500 | -1.75163500 | -0.24629000 |
| H                 | 2.03418700  | 0.53753000  | -1.42886700 | H  | -2.41055000 | -0.31216800 | -2.48850900 |
| TS2' <sub>T</sub> |             |             |             | H  | -4.44226400 | 1.18350800  | 1.02476000  |
| C                 | 1.37374300  | -1.51959500 | 0.47687800  | H  | -5.98295600 | 2.45390400  | -0.41315500 |
| O                 | 1.68877700  | -1.54690100 | 1.64599000  | H  | -5.76985400 | 2.34991000  | -2.89712200 |
| H                 | 1.35451500  | 0.26883600  | -0.88968900 | H  | -3.98383000 | 0.93691600  | -3.92575000 |
| P                 | 0.33967900  | 1.81209900  | 0.72250700  | H  | 2.37179100  | 3.16719500  | -0.89918200 |
| C                 | -0.44033000 | 1.81000400  | 2.41603300  | H  | 4.80681300  | 3.50328600  | -0.61285100 |
| C                 | -1.93475100 | 1.44898100  | 2.35176900  | H  | 5.95594300  | 2.67755600  | 1.44371600  |
| C                 | -2.31884400 | -0.02965000 | 2.13252300  | H  | 4.64181300  | 1.49015500  | 3.20198000  |
| P                 | -2.08094400 | -0.59321900 | 0.37167300  | H  | 2.21245700  | 1.14658200  | 2.92245000  |
| C                 | -2.75103700 | -2.29836700 | 0.34495300  | H  | 0.76285100  | 4.76574000  | 0.98691000  |
| C                 | -1.89819600 | -3.36183800 | 0.67965800  | H  | -1.47479400 | 2.04006200  | -1.50396800 |
| C                 | -2.37664900 | -4.67391200 | 0.69261900  | H  | -2.48528000 | 3.95913500  | -2.70741100 |
| C                 | -3.70993300 | -4.93694300 | 0.36167800  | H  | -1.87907100 | 6.29499600  | -2.05481300 |
| C                 | -4.56392200 | -3.88172900 | 0.02513400  | H  | -0.24740400 | 6.68305400  | -0.20995700 |
| C                 | -4.08986400 | -2.56684600 | 0.01743600  | C  | -1.59616300 | -0.97389200 | 3.09942700  |
| C                 | -3.29992800 | 0.34942600  | -0.62595700 | H  | -2.03784500 | -1.97982600 | 3.08298000  |
| C                 | -3.19556500 | 0.28709300  | -2.02653500 | H  | -0.52566600 | -1.07142900 | 2.86504100  |
| C                 | -4.31934600 | 1.12750300  | -0.05649900 | H  | -1.68692000 | -0.58474900 | 4.12650700  |
| C                 | -5.19974100 | 1.84573900  | -0.87206600 | C  | -0.24020400 | 3.12242500  | 3.17722900  |
| C                 | -5.08247700 | 1.78505500  | -2.26281100 | H  | -0.84604600 | 3.93067900  | 2.74079000  |
| C                 | -4.08155700 | 0.99534400  | -2.83916700 | H  | -0.56374100 | 2.98840000  | 4.22201700  |
| C                 | 2.11347600  | 2.15983200  | 1.00522700  | H  | 0.81022000  | 3.44603400  | 3.18855200  |
| C                 | 2.86218800  | 2.80780700  | 0.00799800  | Co | 0.06433500  | -0.21848900 | -0.26935800 |
| C                 | 4.23606100  | 2.99536300  | 0.16821400  | C  | 3.26528800  | -1.85308100 | -1.14585000 |
| C                 | 4.88044100  | 2.53031200  | 1.31963000  | C  | 3.76241400  | -2.26370400 | -2.39485900 |
| C                 | 4.14440700  | 1.86692700  | 2.30504400  | C  | 4.95053200  | -1.73809600 | -2.90735200 |
| C                 | 2.76767100  | 1.67945200  | 2.15015200  | C  | 5.67319800  | -0.78799400 | -2.17872000 |
| C                 | -0.31121100 | 3.26848200  | -0.16378100 | C  | 5.19691900  | -0.37967800 | -0.93121700 |
| C                 | 0.04070500  | 4.58337900  | 0.19019200  | C  | 4.00746400  | -0.90810300 | -0.41867100 |
| C                 | -1.21292800 | 3.05661100  | -1.21679800 | H  | 3.21808300  | -3.00378100 | -2.98361000 |
| C                 | -1.77995700 | 4.14020600  | -1.89311900 | H  | 5.31193000  | -2.07402100 | -3.88273800 |
| C                 | -1.43895300 | 5.44503300  | -1.52746800 | H  | 6.60097800  | -0.37248500 | -2.57975800 |
| C                 | -0.52408000 | 5.66373200  | -0.49011700 | H  | 5.74842800  | 0.35846500  | -0.34582100 |
| H                 | 0.09804000  | 1.00715100  | 2.94111900  | H  | 3.66309100  | -0.56953800 | 0.55816200  |
| H                 | -2.43350900 | 2.09945700  | 1.61687200  | C  | 1.98693500  | -2.49322500 | -0.57644400 |
| H                 | -2.36348600 | 1.72657700  | 3.32901400  | C  | 2.42889900  | -3.82626100 | 0.09764600  |
| H                 | -3.40108300 | -0.11514400 | 2.31990900  | H  | 3.15726400  | -3.56802000 | 0.88015100  |
| H                 | -0.85764900 | -3.16657800 | 0.93744200  | H  | 2.96644500  | -4.40638300 | -0.67138000 |
| H                 | -1.70244800 | -5.49165200 | 0.95710900  | C  | 0.88367000  | -2.70800900 | -1.64168900 |
| H                 | -4.08298900 | -5.96406200 | 0.36416300  | H  | 0.10697600  | -3.35275600 | -1.21165400 |
|                   |             |             |             | H  | 1.28130200  | -3.26171300 | -2.50870000 |

|     |             |             |             |    |             |             |             |
|-----|-------------|-------------|-------------|----|-------------|-------------|-------------|
| C   | 1.34127400  | -4.68235900 | 0.67730600  | H  | 0.38577300  | 0.85011500  | 2.99395200  |
| C   | 1.15673300  | -4.89626600 | 1.98382800  | H  | -1.85231500 | 2.47147800  | 1.67725700  |
| H   | 0.66959000  | -5.17223500 | -0.03691700 | H  | -1.85289900 | 2.07966200  | 3.38761800  |
| H   | 0.35611200  | -5.54632100 | 2.34992400  | H  | -3.27244900 | 0.51774800  | 2.34622500  |
| H   | 1.79734400  | -4.42244100 | 2.73514400  | H  | -1.48514700 | -2.90950100 | 1.26657400  |
| C   | 0.21231200  | -1.43348600 | -2.10996500 | H  | -2.77046900 | -5.01436600 | 1.29701500  |
| C   | 0.91028100  | -0.25703700 | -2.39290000 | H  | -5.10405200 | -5.07231700 | 0.40024600  |
| H   | -0.81507500 | -1.53261700 | -2.46699600 | H  | -6.12704100 | -2.98730500 | -0.51262500 |
| H   | 0.37643200  | 0.57570000  | -2.86250100 | H  | -4.84641100 | -0.87201400 | -0.52928600 |
| H   | 1.99427800  | -0.25316000 | -2.52114600 | H  | -2.46622600 | 0.17566100  | -2.44871700 |
|     |             |             |             | H  | -4.02450300 | 2.01700300  | 1.14467600  |
| 2's |             |             |             | H  | -5.31961500 | 3.58683300  | -0.23234000 |
| C   | 0.91841700  | -1.40424300 | 0.32675600  | H  | -5.21183100 | 3.47383400  | -2.72306700 |
| O   | 1.24249400  | -1.31133300 | 1.48549000  | H  | -3.78674200 | 1.73659000  | -3.81833200 |
| H   | 1.30973800  | 0.33498900  | -1.12441800 | H  | 3.01990800  | 2.30877300  | -0.93206000 |
| P   | 0.77430700  | 1.54361200  | 0.75635100  | H  | 5.47444800  | 2.20504400  | -0.64904200 |
| C   | 0.03350000  | 1.73916700  | 2.45114000  | H  | 6.45743500  | 1.30976100  | 1.46516400  |
| C   | -1.50308000 | 1.72237400  | 2.40488700  | H  | 4.95013900  | 0.52364800  | 3.29222200  |
| C   | -2.19547800 | 0.36593800  | 2.17337900  | H  | 2.50096600  | 0.64002000  | 3.02336100  |
| P   | -2.07743600 | -0.19519000 | 0.40038200  | H  | 1.91615500  | 4.31636900  | 0.99147400  |
| C   | -3.07150000 | -1.73868100 | 0.36909300  | H  | -0.98964600 | 2.22816200  | -1.43376400 |
| C   | -2.50189200 | -2.91679800 | 0.87822300  | H  | -1.48803600 | 4.31954100  | -2.64824700 |
| C   | -3.22966600 | -4.10789700 | 0.89493200  | H  | -0.29333500 | 6.43139900  | -2.04410400 |
| C   | -4.53495300 | -4.13946700 | 0.39306800  | H  | 1.41043800  | 6.41191100  | -0.22297400 |
| C   | -5.10766800 | -2.97149000 | -0.11904000 | C  | -1.71751700 | -0.70981800 | 3.15586400  |
| C   | -4.38344000 | -1.77521400 | -0.12991800 | H  | -2.40410300 | -1.56626200 | 3.17786800  |
| C   | -3.12584000 | 0.98542500  | -0.54566700 | H  | -0.71290600 | -1.08383900 | 2.91501100  |
| C   | -3.08378700 | 0.92123300  | -1.95038400 | H  | -1.68804200 | -0.28150700 | 4.17091700  |
| C   | -3.94755300 | 1.94843200  | 0.06004200  | C  | 0.52364500  | 2.99324700  | 3.18089700  |
| C   | -4.69035900 | 2.83924600  | -0.72121900 | H  | 0.08886200  | 3.90340700  | 2.74175400  |
| C   | -4.63277500 | 2.77420200  | -2.11554600 | H  | 0.20329600  | 2.94426900  | 4.23404300  |
| C   | -3.83341500 | 1.80422000  | -2.72888200 | H  | 1.61771300  | 3.09375200  | 3.16561400  |
| C   | 2.58412100  | 1.50098200  | 1.03265500  | Co | 0.00395100  | -0.06087600 | -0.56775700 |
| C   | 3.43766000  | 1.92833000  | 0.00228300  | C  | 2.58810400  | -2.34281200 | -1.30025200 |
| C   | 4.82267200  | 1.86704200  | 0.15994800  | C  | 2.83193800  | -2.89274800 | -2.56827900 |
| C   | 5.37288100  | 1.36312300  | 1.34326400  | C  | 4.04726000  | -2.67750700 | -3.22474000 |
| C   | 4.52897100  | 0.92336200  | 2.36662700  | C  | 5.04807600  | -1.90988100 | -2.62310500 |
| C   | 3.14071500  | 0.99332000  | 2.21535600  | C  | 4.82076500  | -1.36387500 | -1.35703900 |
| C   | 0.47857200  | 3.12676900  | -0.11821000 | C  | 3.60495600  | -1.57939600 | -0.70295100 |
| C   | 1.15726900  | 4.31360700  | 0.20831800  | H  | 2.07087200  | -3.49722000 | -3.06264100 |
| C   | -0.46570600 | 3.14271800  | -1.15689400 | H  | 4.20938400  | -3.11508800 | -4.21313900 |
| C   | -0.74748200 | 4.32567200  | -1.84501800 | H  | 5.99810500  | -1.74021000 | -3.13586900 |
| C   | -0.07804900 | 5.50462100  | -1.50645600 | H  | 5.59100700  | -0.76305200 | -0.86970100 |
| C   | 0.87697300  | 5.49434100  | -0.48292400 | H  | 3.45458200  | -1.14497100 | 0.28570500  |

|       |             |             |             |    |             |             |             |
|-------|-------------|-------------|-------------|----|-------------|-------------|-------------|
| C     | 1.29953800  | -2.66264400 | -0.52279300 | C  | 3.16517100  | 1.07089300  | 2.07999500  |
| C     | 1.66749200  | -3.85302700 | 0.41902400  | C  | 0.34471200  | 3.17232100  | -0.08446900 |
| H     | 2.48821600  | -3.51802100 | 1.06840400  | C  | 0.89878500  | 4.39515600  | 0.33327300  |
| H     | 2.07157400  | -4.64293300 | -0.23619100 | C  | -0.53273800 | 3.15682400  | -1.17841500 |
| C     | 0.08244500  | -2.98391500 | -1.41079900 | C  | -0.88154400 | 4.34296200  | -1.82969200 |
| H     | -0.68880800 | -3.44484000 | -0.78534600 | C  | -0.34344800 | 5.55752100  | -1.39629400 |
| H     | 0.33693400  | -3.73894900 | -2.17144700 | C  | 0.55225400  | 5.57959400  | -0.32020000 |
| C     | 0.56672400  | -4.43878300 | 1.25435600  | H  | 0.39971500  | 0.75608200  | 2.92608300  |
| C     | 0.46999400  | -4.31457500 | 2.58191700  | H  | -1.88689700 | 2.39737500  | 1.72647700  |
| H     | -0.19292700 | -5.02338400 | 0.72304800  | H  | -1.85480400 | 1.96056100  | 3.42528000  |
| H     | -0.34675500 | -4.78138800 | 3.14127700  | H  | -3.28606100 | 0.43176000  | 2.33337600  |
| H     | 1.20125700  | -3.73550600 | 3.15520000  | H  | -1.50319400 | -2.99407800 | 1.22319700  |
| C     | -0.52122400 | -1.76052700 | -2.05213800 | H  | -2.79462200 | -5.09903300 | 1.17961700  |
| C     | 0.19479600  | -0.77651200 | -2.68280800 | H  | -5.10903500 | -5.12776900 | 0.23316700  |
| H     | -1.61208100 | -1.74438700 | -2.11972700 | H  | -6.10613700 | -3.01940400 | -0.65351200 |
| H     | -0.33223200 | 0.03545600  | -3.19501700 | H  | -4.81816700 | -0.90876300 | -0.59779700 |
| H     | 1.25546300  | -0.87573000 | -2.90386800 | H  | -2.37179800 | 0.14213100  | -2.45560100 |
|       |             |             |             | H  | -4.01678900 | 1.93933300  | 1.12012300  |
|       |             |             |             | H  | -5.27515000 | 3.53033400  | -0.26703400 |
|       |             |             |             | H  | -5.10625900 | 3.45014800  | -2.75553800 |
|       |             |             |             | H  | -3.65788100 | 1.72538100  | -3.83905300 |
| TS3's |             |             |             | H  | 2.87020400  | 2.55213600  | -0.98146700 |
| C     | 0.91673800  | -1.40912300 | 0.37047100  | H  | 5.33659200  | 2.56198500  | -0.78075800 |
| O     | 1.22518300  | -1.31905500 | 1.53395200  | H  | 6.43400800  | 1.61267600  | 1.25164300  |
| H     | 1.16242800  | 0.28524900  | -1.45503100 | H  | 5.03174300  | 0.64359100  | 3.07427300  |
| P     | 0.72626700  | 1.57518700  | 0.72631600  | H  | 2.57065700  | 0.63395300  | 2.88179500  |
| C     | 0.02165900  | 1.67082700  | 2.44774200  | H  | 1.61444300  | 4.42356000  | 1.15548100  |
| C     | -1.51729600 | 1.63335900  | 2.42791200  | H  | -0.94495200 | 2.20989700  | -1.52431200 |
| C     | -2.20681100 | 0.27882600  | 2.17416900  | H  | -1.57090500 | 4.31234900  | -2.67660700 |
| P     | -2.06442900 | -0.26838200 | 0.39970900  | H  | -0.61144200 | 6.48801500  | -1.90300200 |
| C     | -3.06566500 | -1.80266000 | 0.31863400  | H  | 0.98723200  | 6.52611300  | 0.00998400  |
| C     | -2.51121900 | -2.99307700 | 0.81379600  | C  | -1.74478900 | -0.80750500 | 3.15266700  |
| C     | -3.24221300 | -4.18202900 | 0.78847600  | H  | -2.42616600 | -1.66860700 | 3.14660100  |
| C     | -4.53672600 | -4.19720000 | 0.25873000  | H  | -0.73249400 | -1.17167700 | 2.93052800  |
| C     | -5.09499300 | -3.01588100 | -0.23894900 | H  | -1.74178400 | -0.39295600 | 4.17380400  |
| C     | -4.36699500 | -1.82235800 | -0.20874300 | C  | 0.50160400  | 2.88471800  | 3.24832700  |
| C     | -3.07827500 | 0.92984400  | -0.56149600 | H  | 0.03195100  | 3.81108400  | 2.88553300  |
| C     | -3.00249000 | 0.88293900  | -1.96585300 | H  | 0.21287600  | 2.75622500  | 4.30396400  |
| C     | -3.91262200 | 1.88633600  | 0.03693300  | H  | 1.59195400  | 3.01461200  | 3.21067500  |
| C     | -4.63503700 | 2.78832700  | -0.75026200 | Co | -0.03070600 | -0.09184100 | -0.55254100 |
| C     | -4.54342900 | 2.74124400  | -2.14357000 | C  | 2.67745200  | -2.34303200 | -1.18788100 |
| C     | -3.73120600 | 1.77788100  | -2.75027600 | C  | 3.03140100  | -3.00729000 | -2.37428700 |
| C     | 2.54360700  | 1.61465900  | 0.94606400  | C  | 4.27424600  | -2.79514700 | -2.97591700 |
| C     | 3.33922800  | 2.14229400  | -0.08452600 | C  | 5.19606800  | -1.91590400 | -2.39976600 |
| C     | 4.73005600  | 2.14623900  | 0.02735300  |    |             |             |             |
| C     | 5.34480000  | 1.61222300  | 1.16508200  |    |             |             |             |
| C     | 4.55952200  | 1.07038900  | 2.18615500  |    |             |             |             |

|     |             |             |             |   |             |             |             |
|-----|-------------|-------------|-------------|---|-------------|-------------|-------------|
| C   | 4.86210400  | -1.26106600 | -1.21228200 | C | 4.81175100  | -2.20950000 | -1.91308900 |
| C   | 3.61771300  | -1.47563100 | -0.61155600 | C | 3.97882500  | -1.27828000 | -2.54208600 |
| H   | 2.33324500  | -3.69997300 | -2.84600200 | C | -2.19481300 | -2.10541100 | 0.62868200  |
| H   | 4.52108800  | -3.32222500 | -3.90113400 | C | -2.58786900 | -3.25319700 | -0.07547800 |
| H   | 6.16755500  | -1.74653200 | -2.87072700 | C | -3.92852600 | -3.64834800 | -0.08577200 |
| H   | 5.57011300  | -0.57580200 | -0.74272500 | C | -4.88750300 | -2.90378200 | 0.60634200  |
| H   | 3.38705600  | -0.95755700 | 0.31806600  | C | -4.49907600 | -1.76380300 | 1.31805400  |
| C   | 1.34556200  | -2.65806900 | -0.48200000 | C | -3.16176700 | -1.36522400 | 1.33013500  |
| C   | 1.66324600  | -3.86523600 | 0.45507900  | C | 0.47874400  | -2.89841200 | -0.15828300 |
| H   | 2.45624300  | -3.54449700 | 1.14517100  | C | 0.79419700  | -4.08019300 | 0.53355800  |
| H   | 2.09409600  | -4.64482100 | -0.19556300 | C | 0.86548700  | -2.76842800 | -1.50138700 |
| C   | 0.18000700  | -2.94233200 | -1.44968500 | C | 1.56019500  | -3.79681800 | -2.14132700 |
| H   | -0.64768000 | -3.37736300 | -0.87771300 | C | 1.88190100  | -4.96378900 | -1.44392100 |
| H   | 0.46084000  | -3.70493300 | -2.19418300 | C | 1.49716700  | -5.10288000 | -0.10628200 |
| C   | 0.52749600  | -4.46502700 | 1.22859800  | H | -0.50518100 | -0.41010900 | 2.65914500  |
| C   | 0.39549200  | -4.40102400 | 2.55743500  | H | 2.06185700  | -1.96925900 | 2.08359000  |
| H   | -0.22589300 | -5.00937100 | 0.64797600  | H | 1.71051100  | -1.35855300 | 3.68922500  |
| H   | -0.44504700 | -4.87692100 | 3.07205200  | H | 3.21328200  | 0.12703500  | 2.56740200  |
| H   | 1.12130300  | -3.86430000 | 3.17725600  | H | 2.08098100  | 2.57671400  | -1.62562500 |
| C   | -0.32625300 | -1.68336700 | -2.11046400 | H | 3.43961200  | 4.59351700  | -2.08746900 |
| C   | 0.52125800  | -0.71320400 | -2.66116900 | H | 5.13774000  | 5.36645800  | -0.42669800 |
| H   | -1.38683100 | -1.65839100 | -2.37079100 | H | 5.48938200  | 4.06976500  | 1.67636200  |
| H   | 0.07520900  | 0.07823200  | -3.27338700 | H | 4.16777600  | 2.03444600  | 2.12200100  |
| H   | 1.57087300  | -0.92305000 | -2.86842000 | H | 2.48757200  | 0.25304000  | -2.28103500 |
|     |             |             |             | H | 4.04401000  | -1.54066100 | 1.33641100  |
| 3's |             |             |             | H | 5.46840400  | -3.02424100 | -0.02003300 |
| C   | -1.22333100 | 1.33015700  | 0.43976800  | H | 5.45206100  | -2.86429700 | -2.50901500 |
| O   | -1.43777600 | 1.41741200  | 1.62445100  | H | 3.96423300  | -1.20141300 | -3.63194200 |
| H   | -2.35523600 | -1.64131800 | -2.25719800 | H | -1.85155500 | -3.83827600 | -0.62749500 |
| P   | -0.45911200 | -1.52611700 | 0.60239800  | H | -4.22287200 | -4.54175600 | -0.64186600 |
| C   | 0.00561500  | -1.35044700 | 2.40513400  | H | -5.93582800 | -3.21171200 | 0.59356300  |
| C   | 1.52195200  | -1.17521000 | 2.61892200  | H | -5.24147400 | -1.17645500 | 1.86298100  |
| C   | 2.14330100  | 0.20274800  | 2.31689400  | H | -2.87456300 | -0.47392500 | 1.88587500  |
| P   | 2.04279800  | 0.62766300  | 0.51761400  | H | 0.48629000  | -4.21411900 | 1.56879700  |
| C   | 3.01209100  | 2.17251000  | 0.28670800  | H | 0.62517000  | -1.85767900 | -2.05015400 |
| C   | 2.83187300  | 2.89700700  | -0.90127100 | H | 1.85841500  | -3.67908800 | -3.18512300 |
| C   | 3.59547100  | 4.03649600  | -1.16047700 | H | 2.43204200  | -5.76591200 | -1.94181300 |
| C   | 4.54638100  | 4.46880000  | -0.23025300 | H | 1.74129700  | -6.01513200 | 0.44330700  |
| C   | 4.74103300  | 3.74424000  | 0.94960700  | C | 1.51883000  | 1.31633700  | 3.16879200  |
| C   | 3.98532600  | 2.59592500  | 1.20461100  | H | 2.05906700  | 2.26676700  | 3.06333400  |
| C   | 3.15358100  | -0.54046500 | -0.37559200 | H | 0.46988400  | 1.49742200  | 2.90186200  |
| C   | 3.14841100  | -0.45775200 | -1.77895800 | H | 1.55877000  | 1.02436100  | 4.23072900  |
| C   | 4.00208000  | -1.46418200 | 0.24967800  | C | -0.54177600 | -2.44256700 | 3.33306200  |
| C   | 4.81857100  | -2.30106600 | -0.51891900 | H | 0.05185200  | -3.36609300 | 3.28011100  |

|                 |             |             |             |   |             |             |             |
|-----------------|-------------|-------------|-------------|---|-------------|-------------|-------------|
| H               | -0.48445800 | -2.07952100 | 4.37167300  | C | 4.10436800  | 4.86094000  | 0.45325500  |
| H               | -1.58972400 | -2.69397500 | 3.12349200  | C | 4.88863500  | 3.76320600  | 0.82972000  |
| Co              | -0.01573600 | 0.30363300  | -0.49891700 | C | 4.33970600  | 2.48004300  | 0.83356200  |
| C               | -3.42923400 | 2.07585300  | -0.65617000 | C | 3.49736600  | -0.37035500 | -0.42203400 |
| C               | -4.13853200 | 2.22993600  | -1.85836300 | C | 3.60403300  | -0.14925800 | -1.80702500 |
| C               | -5.53374800 | 2.16668800  | -1.88490700 | C | 4.33664400  | -1.31353200 | 0.18660900  |
| C               | -6.25336700 | 1.95312100  | -0.70550500 | C | 5.25450700  | -2.03762200 | -0.58230300 |
| C               | -5.56023100 | 1.82318000  | 0.50067200  | C | 5.35231400  | -1.81636500 | -1.95787200 |
| C               | -4.16427500 | 1.89247000  | 0.52541600  | C | 4.52914000  | -0.86268200 | -2.56849200 |
| H               | -3.60344600 | 2.39341900  | -2.79403900 | C | -2.04225300 | -2.25507500 | 0.75953200  |
| H               | -6.05972800 | 2.28246400  | -2.83608100 | C | -2.49621400 | -3.37435900 | 0.04513300  |
| H               | -7.34451100 | 1.89599100  | -0.72618100 | C | -3.84037000 | -3.75304200 | 0.10868500  |
| H               | -6.10678400 | 1.66737700  | 1.43433800  | C | -4.74232700 | -3.02361300 | 0.88887500  |
| H               | -3.63960400 | 1.80046300  | 1.47505500  | C | -4.29582000 | -1.90547500 | 1.60107400  |
| C               | -1.90266900 | 2.22065600  | -0.64477000 | C | -2.95772500 | -1.51490900 | 1.52866600  |
| C               | -1.60780800 | 3.71803000  | -0.31797800 | C | 0.62903100  | -2.93198400 | -0.22580000 |
| H               | -2.16456500 | 3.96678400  | 0.59738100  | C | 0.79285100  | -4.25081500 | 0.23349700  |
| H               | -2.04823900 | 4.30732300  | -1.14002500 | C | 1.24528800  | -2.54451400 | -1.42731100 |
| C               | -1.22154900 | 1.70264900  | -1.93094100 | C | 2.02632400  | -3.44891000 | -2.15077300 |
| H               | -0.15556800 | 2.03573600  | -1.89755500 | C | 2.20149500  | -4.75134800 | -1.67584300 |
| H               | -1.57730000 | 2.18058500  | -2.85930000 | C | 1.58024100  | -5.15166300 | -0.48698800 |
| C               | -0.16313400 | 4.07519400  | -0.14485800 | H | -0.28900200 | -0.72420300 | 2.82944500  |
| C               | 0.40745400  | 4.35548600  | 1.03099500  | H | 2.31813400  | -2.05095000 | 1.92073200  |
| H               | 0.45244300  | 4.08709200  | -1.04911700 | H | 2.06086900  | -1.53592600 | 3.57717800  |
| H               | 1.47094700  | 4.59701000  | 1.10653100  | H | 3.36464700  | 0.11846800  | 2.53983200  |
| H               | -0.17233700 | 4.35217300  | 1.96022800  | H | 1.16977100  | 3.23988400  | -0.18614900 |
| C               | -1.24967100 | 0.17819300  | -1.98035700 | H | 2.15782200  | 5.52759400  | -0.21262900 |
| C               | -2.54964500 | -0.56375000 | -2.16113900 | H | 4.53762600  | 5.86420100  | 0.44502500  |
| H               | -0.51326900 | -0.18104600 | -2.72691500 | H | 5.93307100  | 3.90881400  | 1.11657300  |
| H               | -3.06207300 | -0.23887000 | -3.08543900 | H | 4.95687800  | 1.62381100  | 1.11641500  |
| H               | -3.25375900 | -0.42609200 | -1.33200800 | H | 2.95630600  | 0.58694200  | -2.29101100 |
|                 |             |             |             | H | 4.28920300  | -1.49435700 | 1.26040100  |
| 3' <sub>T</sub> |             |             |             | H | 5.89807200  | -2.77594500 | -0.09783000 |
| C               | -1.44170000 | 1.69782500  | 0.11417100  | H | 6.06937300  | -2.38470000 | -2.55512100 |
| O               | -1.44113300 | 1.97320800  | 1.28532100  | H | 4.60266900  | -0.68131600 | -3.64350300 |
| H               | -1.33188700 | -1.65563100 | -2.26526100 | H | -1.80330900 | -3.95165300 | -0.56848400 |
| P               | -0.32348200 | -1.64475400 | 0.65207200  | H | -4.18218400 | -4.62480600 | -0.45493100 |
| C               | 0.26359500  | -1.59053800 | 2.43179600  | H | -5.79221400 | -3.32223200 | 0.93937500  |
| C               | 1.77701100  | -1.31507000 | 2.53448800  | H | -4.99511900 | -1.32635700 | 2.20667800  |
| C               | 2.29810500  | 0.11070000  | 2.26233500  | H | -2.62566000 | -0.62569200 | 2.06946000  |
| P               | 2.24384500  | 0.61941500  | 0.47214800  | H | 0.29769500  | -4.58142100 | 1.14633200  |
| C               | 2.99697600  | 2.28849400  | 0.46760600  | H | 1.11133000  | -1.52261900 | -1.78898800 |
| C               | 2.21442300  | 3.38928000  | 0.09425900  | H | 2.50514900  | -3.13088700 | -3.07887700 |
| C               | 2.76949800  | 4.67322800  | 0.08490500  | H | 2.81928700  | -5.45909800 | -2.23416200 |

|       |             |             |             |   |             |             |             |
|-------|-------------|-------------|-------------|---|-------------|-------------|-------------|
| H     | 1.70751800  | -6.17292300 | -0.11963200 | C | -0.48380800 | 1.52525500  | 2.33768800  |
| C     | 1.57438400  | 1.16918200  | 3.10261100  | C | -1.65441600 | 0.61408200  | 2.74470800  |
| H     | 2.09317400  | 2.13753200  | 3.06020800  | C | -1.61188500 | -0.86779200 | 2.33269100  |
| H     | 0.54017700  | 1.32865500  | 2.76234300  | P | -1.73801700 | -1.05644700 | 0.49770100  |
| H     | 1.54243600  | 0.84706000  | 4.15593300  | C | -2.14115400 | -2.81083700 | 0.14880100  |
| C     | -0.10527800 | -2.81651600 | 3.27201000  | C | -1.93754400 | -3.27782900 | -1.15869600 |
| H     | 0.53424100  | -3.67771500 | 3.02970600  | C | -2.31267100 | -4.57612100 | -1.50989200 |
| H     | 0.04803900  | -2.58491000 | 4.33865800  | C | -2.89901700 | -5.41653400 | -0.55748000 |
| H     | -1.15452900 | -3.11500200 | 3.13941900  | C | -3.11629600 | -4.94999800 | 0.74304700  |
| Co    | 0.00521900  | 0.47224800  | -0.39494900 | C | -2.74271500 | -3.65040400 | 1.09699000  |
| C     | -3.79910500 | 1.63551500  | -0.74299000 | C | -3.35385200 | -0.32766200 | 0.00214900  |
| C     | -4.56949900 | 1.15985700  | -1.81523100 | C | -3.53787200 | -0.02082100 | -1.35442500 |
| C     | -5.86191300 | 0.66689300  | -1.60989100 | C | -4.43167300 | -0.19091200 | 0.88960800  |
| C     | -6.41719600 | 0.64880200  | -0.32828200 | C | -5.66848200 | 0.26720500  | 0.42631200  |
| C     | -5.66602800 | 1.13302600  | 0.74626400  | C | -5.84461600 | 0.57458400  | -0.92586300 |
| C     | -4.37344300 | 1.61809100  | 0.53993300  | C | -4.77687600 | 0.42449800  | -1.81661900 |
| H     | -4.17078900 | 1.16983200  | -2.82875600 | C | 1.12395600  | 2.98239800  | 0.42789900  |
| H     | -6.43673600 | 0.29818300  | -2.46327200 | C | 0.97185500  | 4.11940500  | -0.38300000 |
| H     | -7.42693300 | 0.26281300  | -0.16856700 | C | 1.96972100  | 5.09742600  | -0.43266700 |
| H     | -6.08502400 | 1.12947600  | 1.75542500  | C | 3.12896200  | 4.96167100  | 0.33396900  |
| H     | -3.80058900 | 1.98775600  | 1.39124100  | C | 3.27755000  | 3.84483300  | 1.16261600  |
| C     | -2.41224900 | 2.26888600  | -0.95200400 | C | 2.28675600  | 2.86369500  | 1.21180900  |
| C     | -2.58880200 | 3.80789200  | -0.78210700 | C | -1.58252800 | 2.46531900  | -0.37583300 |
| H     | -3.15435500 | 3.99523100  | 0.14158600  | C | -2.70769900 | 3.02965700  | 0.24163100  |
| H     | -3.22997900 | 4.13150500  | -1.62069400 | C | -1.49118800 | 2.49014800  | -1.78076900 |
| C     | -1.69976800 | 1.86576700  | -2.25157000 | C | -2.48662600 | 3.09615300  | -2.54697600 |
| H     | -0.89880500 | 2.59536900  | -2.43584600 | C | -3.60344400 | 3.65969600  | -1.92243400 |
| H     | -2.36962000 | 1.91920700  | -3.12433300 | C | -3.71443200 | 3.61665200  | -0.53046400 |
| C     | -1.33028700 | 4.62570400  | -0.76639500 | H | 0.45515800  | 1.03747800  | 2.64390800  |
| C     | -0.92476400 | 5.34561400  | 0.28457700  | H | -2.60204400 | 1.06791700  | 2.42306000  |
| H     | -0.73010100 | 4.63917500  | -1.68363000 | H | -1.67870300 | 0.62623300  | 3.84714600  |
| H     | -0.01456400 | 5.95040200  | 0.25075700  | H | -2.50521300 | -1.33782900 | 2.77017600  |
| H     | -1.49553800 | 5.35868700  | 1.21980600  | H | -1.48410800 | -2.62065600 | -1.90489400 |
| C     | -1.06755000 | 0.48969200  | -2.09438900 | H | -2.14368600 | -4.93339000 | -2.52857500 |
| C     | -1.92613300 | -0.73324000 | -2.32913500 | H | -3.18902700 | -6.43422700 | -0.82987800 |
| H     | -0.12421200 | 0.41276100  | -2.67371700 | H | -3.57864000 | -5.60116400 | 1.48888600  |
| H     | -2.36762500 | -0.70011700 | -3.34437800 | H | -2.92423400 | -3.30061100 | 2.11454700  |
| H     | -2.75708500 | -0.81767800 | -1.61774900 | H | -2.70470700 | -0.12814100 | -2.05149600 |
|       |             |             |             | H | -4.32386300 | -0.44562900 | 1.94470200  |
|       |             |             |             | H | -6.49947300 | 0.37788600  | 1.12734000  |
| TS4's |             |             |             | H | -6.81244200 | 0.93236800  | -1.28548100 |
| C     | 2.01353700  | -0.56564400 | -0.07035700 | H | -4.90521800 | 0.66673600  | -2.87392800 |
| O     | 2.21807500  | -0.03886900 | 1.02301600  | H | 0.07585200  | 4.25519200  | -0.98670300 |
| H     | 2.38743500  | 2.18049600  | -1.55669900 | H | 1.83283800  | 5.97113700  | -1.07453000 |
| P     | -0.18002700 | 1.67791800  | 0.49986500  |   |             |             |             |

|    |             |             |             |                  |             |             |             |
|----|-------------|-------------|-------------|------------------|-------------|-------------|-------------|
| H  | 3.90946800  | 5.72548400  | 0.29324300  | H                | 3.77832800  | 1.10129300  | -1.32550600 |
| H  | 4.17506200  | 3.73194800  | 1.77583300  |                  |             |             |             |
| H  | 2.42838400  | 1.99302700  | 1.84635900  | TS4 <sub>T</sub> |             |             |             |
| H  | -2.81673100 | 3.01410800  | 1.32466600  | C                | 2.01305100  | -0.80620100 | 0.00389500  |
| H  | -0.62960900 | 2.03948900  | -2.27919200 | O                | 2.13367000  | -0.27991400 | 1.09035300  |
| H  | -2.39644200 | 3.11538900  | -3.63561800 | H                | 2.00553000  | 1.83281700  | -1.92476200 |
| H  | -4.39184800 | 4.12222000  | -2.52098500 | P                | -0.11556400 | 1.85093100  | 0.50328200  |
| H  | -4.59087800 | 4.04237100  | -0.03646400 | C                | -0.68690100 | 1.71216700  | 2.28734400  |
| C  | -0.37250700 | -1.60165000 | 2.85392100  | C                | -2.04411000 | 0.99068100  | 2.40989200  |
| H  | -0.43317900 | -2.68164500 | 2.66000700  | C                | -2.11233800 | -0.54012000 | 2.21075500  |
| H  | 0.54900800  | -1.22840400 | 2.38617500  | P                | -2.01762700 | -1.05390600 | 0.43005700  |
| H  | -0.29141000 | -1.45534400 | 3.94326300  | C                | -2.41204100 | -2.84835700 | 0.38326900  |
| C  | -0.58370700 | 2.86619800  | 3.07505600  | C                | -1.98866900 | -3.57321000 | -0.74206500 |
| H  | -1.52995000 | 3.38460700  | 2.86578500  | C                | -2.28898400 | -4.93146300 | -0.86532300 |
| H  | -0.54433600 | 2.67804600  | 4.15997900  | C                | -3.00977900 | -5.58185100 | 0.14136700  |
| H  | 0.24038600  | 3.54589400  | 2.82393100  | C                | -3.44128500 | -4.86398700 | 1.26164200  |
| Co | 0.08177000  | -0.26087400 | -0.55962300 | C                | -3.15206500 | -3.50145700 | 1.38029700  |
| C  | 4.35767500  | -1.42365200 | -0.46796100 | C                | -3.50555600 | -0.38585300 | -0.41620200 |
| C  | 5.28348800  | -1.39420700 | -1.52136500 | C                | -3.55255800 | -0.50837200 | -1.81562400 |
| C  | 6.64391300  | -1.16818300 | -1.28202000 | C                | -4.59243100 | 0.19123200  | 0.25551100  |
| C  | 7.10793200  | -0.96813300 | 0.01980800  | C                | -5.69638200 | 0.65966800  | -0.46541400 |
| C  | 6.19783700  | -1.00894700 | 1.08173600  | C                | -5.73382400 | 0.53926900  | -1.85680800 |
| C  | 4.84233000  | -1.24086400 | 0.84028300  | C                | -4.66124500 | -0.05562400 | -2.53085100 |
| H  | 4.95411400  | -1.54767400 | -2.54916800 | C                | 1.37430600  | 2.92170700  | 0.59291000  |
| H  | 7.34169500  | -1.14824800 | -2.12332400 | C                | 1.60052800  | 3.92051900  | -0.36944600 |
| H  | 8.16927100  | -0.78643100 | 0.20733900  | C                | 2.78588900  | 4.66108800  | -0.36327800 |
| H  | 6.54562600  | -0.86053900 | 2.10758600  | C                | 3.76366800  | 4.41705500  | 0.60532800  |
| H  | 4.14168100  | -1.26352200 | 1.67415400  | C                | 3.54624200  | 3.42726700  | 1.56954800  |
| C  | 2.86910000  | -1.72869400 | -0.69092800 | C                | 2.36408300  | 2.68317300  | 1.56314600  |
| C  | 2.64933200  | -3.17892100 | -0.22036600 | C                | -1.34854200 | 2.89608000  | -0.35902400 |
| H  | 3.08777900  | -3.30094300 | 0.78172300  | C                | -1.70348700 | 4.19242500  | 0.05768800  |
| H  | 3.25582900  | -3.80876100 | -0.89867300 | C                | -1.95621500 | 2.36142800  | -1.50387700 |
| C  | 2.35170100  | -1.32959300 | -2.09240500 | C                | -2.92300100 | 3.08671200  | -2.20641600 |
| H  | 1.49707500  | -1.95467100 | -2.38860300 | C                | -3.28866500 | 4.36194200  | -1.76945200 |
| H  | 3.07350900  | -1.32848900 | -2.91693700 | C                | -2.67191600 | 4.91569600  | -0.64057100 |
| C  | 1.24580000  | -3.69377500 | -0.21134300 | H                | 0.09573000  | 1.08196000  | 2.73629700  |
| C  | 0.72858100  | -4.42588400 | 0.78000900  | H                | -2.77902400 | 1.50059100  | 1.76861100  |
| H  | 0.63529400  | -3.49365400 | -1.09726100 | H                | -2.38740400 | 1.16366300  | 3.44335800  |
| H  | -0.28540800 | -4.82551900 | 0.72986700  | H                | -3.09725700 | -0.85559700 | 2.58901800  |
| H  | 1.31182900  | -4.65616700 | 1.67889200  | H                | -1.41206400 | -3.07148700 | -1.52297600 |
| C  | 1.87999900  | 0.06963000  | -1.64755100 | H                | -1.95023200 | -5.48486100 | -1.74455300 |
| C  | 2.83459400  | 1.23222800  | -1.87294900 | H                | -3.23677500 | -6.64706900 | 0.05235400  |
| H  | 0.90236500  | 0.35494100  | -2.11595400 | H                | -4.00986200 | -5.36606900 | 2.04834900  |
| H  | 3.07375100  | 1.30781400  | -2.94672800 | H                | -3.50696300 | -2.95631500 | 2.25669300  |

|    |             |             |             |     |             |             |             |
|----|-------------|-------------|-------------|-----|-------------|-------------|-------------|
| H  | -2.70976000 | -0.95520800 | -2.34916100 | H   | 0.69468300  | -3.87006200 | -0.67984800 |
| H  | -4.59556300 | 0.27955600  | 1.34235900  | H   | -0.30581800 | -4.32694200 | 1.49420500  |
| H  | -6.53304800 | 1.11714800  | 0.06834900  | H   | 1.29022600  | -3.86651700 | 2.34752100  |
| H  | -6.59734500 | 0.90728000  | -2.41615800 | C   | 1.65288100  | -0.30317100 | -1.78286500 |
| H  | -4.68335100 | -0.15554100 | -3.61872900 | C   | 2.53551400  | 0.88958800  | -2.10484800 |
| H  | 0.85089900  | 4.12072000  | -1.13677500 | H   | 0.67328300  | -0.16683300 | -2.29357300 |
| H  | 2.94337700  | 5.43307700  | -1.12076900 | H   | 2.82196800  | 0.85560500  | -3.17043800 |
| H  | 4.69037300  | 4.99619000  | 0.61049600  | H   | 3.46293800  | 0.90437800  | -1.51339200 |
| H  | 4.30293900  | 3.22952500  | 2.33303700  |     |             |             |             |
| H  | 2.21915700  | 1.90910700  | 2.31561400  | 4's |             |             |             |
| H  | -1.21073200 | 4.64777300  | 0.91634800  | C   | -2.45893200 | 0.21770800  | 0.18799000  |
| H  | -1.66737000 | 1.36612800  | -1.84054700 | O   | -2.29731000 | -0.19414600 | 1.31645900  |
| H  | -3.39133900 | 2.65051200  | -3.09110100 | H   | -2.59001800 | -2.33011200 | -1.25796200 |
| H  | -4.04771700 | 4.93108200  | -2.31200700 | P   | 0.52493200  | -1.66369500 | 0.49578700  |
| H  | -2.94381800 | 5.91977500  | -0.30543600 | C   | 0.81183500  | -1.47638100 | 2.33371000  |
| C  | -1.02436200 | -1.27785600 | 3.00074400  | C   | 2.02798400  | -0.57840200 | 2.62275900  |
| H  | -1.19856600 | -2.36203300 | 3.01931200  | C   | 1.93984500  | 0.91477700  | 2.25381900  |
| H  | -0.02517000 | -1.10941500 | 2.57168000  | P   | 1.82757300  | 1.17951700  | 0.42109700  |
| H  | -1.01224400 | -0.91883500 | 4.04253300  | C   | 1.77053800  | 2.99060900  | 0.14523500  |
| C  | -0.73931700 | 3.03178800  | 3.06305500  | C   | 1.07237700  | 3.45669600  | -0.97850400 |
| H  | -1.62292900 | 3.62525400  | 2.78608800  | C   | 1.04781900  | 4.82165800  | -1.27828700 |
| H  | -0.81402900 | 2.81724400  | 4.14182700  | C   | 1.71441000  | 5.72955100  | -0.45058300 |
| H  | 0.15539000  | 3.64944400  | 2.90405100  | C   | 2.41757000  | 5.26866200  | 0.66904400  |
| Co | 0.08682900  | -0.37316000 | -0.35889900 | C   | 2.45370600  | 3.90400800  | 0.96311900  |
| C  | 4.38170400  | -1.55824400 | -0.59450900 | C   | 3.49239400  | 0.82020600  | -0.28216700 |
| C  | 5.22284700  | -2.06464000 | -1.59970800 | C   | 3.67043000  | 1.08604200  | -1.65145400 |
| C  | 6.59865400  | -1.82184200 | -1.57724400 | C   | 4.57042600  | 0.31335400  | 0.45587800  |
| C  | 7.16381600  | -1.06593000 | -0.54579500 | C   | 5.79556200  | 0.05576400  | -0.17043800 |
| C  | 6.33910400  | -0.56908400 | 0.46684500  | C   | 5.96242400  | 0.31856500  | -1.53159500 |
| C  | 4.96332000  | -0.81974000 | 0.44775600  | C   | 4.89587600  | 0.84461200  | -2.26998500 |
| H  | 4.80247400  | -2.65981100 | -2.41273400 | C   | -0.68248900 | -3.03937300 | 0.32718500  |
| H  | 7.23024300  | -2.22478300 | -2.37321800 | C   | -0.55630800 | -3.94694100 | -0.73764400 |
| H  | 8.23863100  | -0.86876900 | -0.53051500 | C   | -1.50432600 | -4.95644700 | -0.92514000 |
| H  | 6.76613200  | 0.01978200  | 1.28278400  | C   | -2.58760900 | -5.07446600 | -0.04964800 |
| H  | 4.33588900  | -0.42907200 | 1.24797000  | C   | -2.71669200 | -4.17759800 | 1.01602700  |
| C  | 2.88691400  | -1.90038700 | -0.63317200 | C   | -1.77360800 | -3.16486300 | 1.20354500  |
| C  | 2.70858500  | -3.28495800 | 0.04147700  | C   | 2.03132700  | -2.38300400 | -0.26345600 |
| H  | 3.22152400  | -3.25626500 | 1.01508200  | C   | 2.76829500  | -3.42862700 | 0.31715500  |
| H  | 3.25119400  | -4.01133900 | -0.58865100 | C   | 2.42021100  | -1.88757500 | -1.51676800 |
| C  | 2.25378400  | -1.69180500 | -2.03025500 | C   | 3.53132800  | -2.41665400 | -2.17744900 |
| H  | 1.46009900  | -2.42579400 | -2.22321500 | C   | 4.27454300  | -3.43921900 | -1.58258700 |
| H  | 2.96065600  | -1.71847100 | -2.86874600 | C   | 3.88988300  | -3.94464200 | -0.33537200 |
| C  | 1.29113700  | -3.73365300 | 0.22784000  | H   | -0.10728000 | -0.95685700 | 2.64597300  |
| C  | 0.72917700  | -3.98705400 | 1.41422900  | H   | 2.91711200  | -1.04251000 | 2.17207300  |



|    |             |             |             |                |             |             |             |
|----|-------------|-------------|-------------|----------------|-------------|-------------|-------------|
| H  | 2.19363500  | -0.61282300 | 3.71252500  | H              | -3.70484700 | 2.59335900  | 1.35081700  |
| H  | 2.87486200  | 1.38703800  | 2.59484200  | H              | -3.96817800 | 3.39628700  | -0.20258400 |
| H  | 0.53968000  | 2.74711300  | -1.61885700 | C              | -2.52759000 | 1.17434100  | -1.72124200 |
| H  | 0.49849800  | 5.17620900  | -2.15368500 | H              | -1.70326200 | 1.89206200  | -1.82869800 |
| H  | 1.68923300  | 6.79801500  | -0.67829500 | H              | -3.11915900 | 1.16331800  | -2.64406200 |
| H  | 2.94402400  | 5.97630500  | 1.31425100  | C              | -1.94424200 | 3.41288600  | 0.44016100  |
| H  | 3.01775600  | 3.55450800  | 1.83056500  | C              | -1.39273800 | 3.87306500  | 1.56647000  |
| H  | 2.83966800  | 1.47954400  | -2.24201000 | H              | -1.41881800 | 3.57830900  | -0.50397800 |
| H  | 4.47582500  | 0.11196100  | 1.52242000  | H              | -0.43496500 | 4.39918500  | 1.55325900  |
| H  | 6.62358900  | -0.34939000 | 0.41640000  | H              | -1.87827900 | 3.74023600  | 2.53960200  |
| H  | 6.92015500  | 0.11600300  | -2.01711200 | C              | -2.03126400 | -0.21657600 | -1.23196800 |
| H  | 5.01682700  | 1.05673000  | -3.33510700 | C              | -2.82378700 | -1.40480300 | -1.79366800 |
| H  | 0.28139500  | -3.86371300 | -1.43162100 | H              | -0.95817100 | -0.50699000 | -1.54157100 |
| H  | -1.39432400 | -5.65233400 | -1.76046400 | H              | -2.57559300 | -1.54316900 | -2.85726600 |
| H  | -3.32902000 | -5.86381300 | -0.19602100 | H              | -3.90333600 | -1.21953700 | -1.71336500 |
| H  | -3.56006400 | -4.26276500 | 1.70572900  |                |             |             |             |
| H  | -1.90054900 | -2.46155400 | 2.02415500  | 4 <sup>T</sup> |             |             |             |
| H  | 2.46466000  | -3.85487500 | 1.27195300  | C              | 2.35787400  | -1.04718600 | -1.05606900 |
| H  | 1.84534100  | -1.07210900 | -1.96128100 | O              | 1.37939800  | -0.98984500 | -0.33090000 |
| H  | 3.82430100  | -2.01846500 | -3.15115400 | H              | 0.84904600  | 0.51057300  | -3.03038600 |
| H  | 5.15219900  | -3.84609300 | -2.09098100 | P              | -0.38997200 | 1.78451500  | 0.15079700  |
| H  | 4.46231200  | -4.75111700 | 0.12950500  | C              | -0.47338100 | 1.52901100  | 2.00673300  |
| C  | 0.75743200  | 1.59934800  | 2.94725400  | C              | -1.72850800 | 0.72739100  | 2.40652400  |
| H  | 0.81665700  | 2.69200300  | 2.86618100  | C              | -1.74794100 | -0.79297900 | 2.14269800  |
| H  | -0.20491500 | 1.28504400  | 2.51731400  | P              | -2.02912700 | -1.22061500 | 0.34640300  |
| H  | 0.75610900  | 1.33690500  | 4.01753700  | C              | -2.10020500 | -3.05982800 | 0.37217800  |
| C  | 0.93232000  | -2.77029700 | 3.14820500  | C              | -1.05286800 | -3.77030600 | -0.23383100 |
| H  | 1.94591600  | -3.19178000 | 3.08716300  | C              | -1.05025800 | -5.16883900 | -0.22807900 |
| H  | 0.74076900  | -2.54255600 | 4.20919800  | C              | -2.09696300 | -5.86678400 | 0.38187900  |
| H  | 0.21912800  | -3.54466200 | 2.83809600  | C              | -3.14615000 | -5.16403600 | 0.98676200  |
| Co | 0.04262800  | 0.23983300  | -0.45187300 | C              | -3.14954600 | -3.76714300 | 0.98088300  |
| C  | -4.77486000 | 0.93673400  | -0.46058100 | C              | -3.77913700 | -0.77318600 | 0.00006700  |
| C  | -5.57472900 | 1.33177600  | -1.54372600 | C              | -4.17311900 | -0.78326100 | -1.35042500 |
| C  | -6.92843100 | 0.98865200  | -1.59370300 | C              | -4.71322200 | -0.38997800 | 0.97396000  |
| C  | -7.50565200 | 0.24456500  | -0.55932000 | C              | -6.00930700 | -0.01456800 | 0.60268700  |
| C  | -6.71917500 | -0.14401200 | 0.52885000  | C              | -6.39087700 | -0.02843100 | -0.74140300 |
| C  | -5.36562000 | 0.20331300  | 0.57939200  | C              | -5.46954100 | -0.42165200 | -1.71955000 |
| H  | -5.13936700 | 1.91415900  | -2.35841100 | C              | 1.16460200  | 2.72312100  | -0.10781700 |
| H  | -7.53451300 | 1.30367800  | -2.44709200 | C              | 1.26454800  | 3.71077200  | -1.10304900 |
| H  | -8.56293800 | -0.02872700 | -0.60135400 | C              | 2.49802900  | 4.29536200  | -1.40299000 |
| H  | -7.15901500 | -0.72302900 | 1.34494300  | C              | 3.65196500  | 3.90030700  | -0.71795500 |
| H  | -4.76033900 | -0.10335700 | 1.43421000  | C              | 3.56361500  | 2.91405900  | 0.27001600  |
| C  | -3.30819600 | 1.37303800  | -0.37859300 | C              | 2.33152000  | 2.32734900  | 0.56892300  |
| C  | -3.27441300 | 2.73406800  | 0.34638800  | C              | -1.73017200 | 2.98037400  | -0.22406100 |

|    |             |             |             |                  |             |             |             |
|----|-------------|-------------|-------------|------------------|-------------|-------------|-------------|
| C  | -1.72935900 | 4.32310700  | 0.19397000  | H                | 6.25362400  | -0.12359100 | -0.60532100 |
| C  | -2.82912400 | 2.49557600  | -0.95041600 | H                | 7.29242400  | 0.89796500  | 1.40008900  |
| C  | -3.92173600 | 3.32089400  | -1.23151200 | H                | 6.07711600  | 0.89714900  | 3.58152800  |
| C  | -3.91834000 | 4.65001400  | -0.79958000 | H                | 3.82065600  | -0.16333800 | 3.73571500  |
| C  | -2.81750200 | 5.15051600  | -0.09336800 | H                | 2.79338800  | -1.20159200 | 1.73188800  |
| H  | 0.41919400  | 0.92037500  | 2.21739600  | C                | 3.82683900  | -1.38247000 | -0.79381300 |
| H  | -2.61992500 | 1.20366600  | 1.96685700  | C                | 4.05999500  | -2.92266300 | -0.72670600 |
| H  | -1.83959600 | 0.84611500  | 3.49788000  | H                | 3.70975200  | -3.27004200 | 0.25738000  |
| H  | -2.60806100 | -1.20371100 | 2.69558900  | H                | 5.15292000  | -3.06844300 | -0.76378400 |
| H  | -0.23514200 | -3.22102000 | -0.70712300 | C                | 4.11714200  | -0.74369400 | -2.19810800 |
| H  | -0.23163300 | -5.71321100 | -0.70409800 | H                | 4.72676600  | -1.34764800 | -2.88139100 |
| H  | -2.09814900 | -6.95975100 | 0.38375600  | H                | 4.54443900  | 0.26339500  | -2.10938800 |
| H  | -3.96659900 | -5.70780600 | 1.46208800  | C                | 3.39428400  | -3.71999100 | -1.81108500 |
| H  | -3.97486300 | -3.22506600 | 1.44895400  | C                | 2.37003900  | -4.55396900 | -1.60337600 |
| H  | -3.44954000 | -1.06753100 | -2.12026000 | H                | 3.78074600  | -3.58665400 | -2.82862400 |
| H  | -4.44248600 | -0.37804400 | 2.03045000  | H                | 1.90784800  | -5.11176800 | -2.42346500 |
| H  | -6.72378700 | 0.28924900  | 1.37189000  | H                | 1.96249800  | -4.71304000 | -0.59973900 |
| H  | -7.40303900 | 0.26758800  | -1.02793100 | C                | 2.58878700  | -0.68897400 | -2.50462700 |
| H  | -5.75936100 | -0.43570900 | -2.77318500 | C                | 1.95154900  | 0.58601000  | -3.03641800 |
| H  | 0.37572100  | 4.02256100  | -1.65522100 | H                | 2.28074600  | -1.55649100 | -3.11511500 |
| H  | 2.55688700  | 5.06321600  | -2.17874500 | H                | 2.26361800  | 0.76549300  | -4.07677500 |
| H  | 4.61587800  | 4.35787700  | -0.95383400 | H                | 2.24049500  | 1.45619000  | -2.43072400 |
| H  | 4.45609400  | 2.59132100  | 0.80993300  |                  |             |             |             |
| H  | 2.29088900  | 1.54748800  | 1.32969200  | TS5 <sub>s</sub> |             |             |             |
| H  | -0.87376300 | 4.72886400  | 0.73519900  | C                | 3.67652100  | 0.64943200  | -0.77578700 |
| H  | -2.82648100 | 1.45924700  | -1.28901400 | C                | 4.32766700  | 0.18146400  | -1.92802400 |
| H  | -4.77236000 | 2.92251900  | -1.78991700 | C                | 5.64003900  | -0.29309100 | -1.86465800 |
| H  | -4.76917200 | 5.30033600  | -1.01805000 | C                | 6.32393700  | -0.31090300 | -0.64469300 |
| H  | -2.80716900 | 6.19245900  | 0.23640300  | C                | 5.68609800  | 0.15961400  | 0.50641900  |
| C  | -0.48462900 | -1.50038700 | 2.64481400  | C                | 4.37501100  | 0.64162300  | 0.44054400  |
| H  | -0.61732200 | -2.59178700 | 2.65838500  | H                | 3.80412800  | 0.18140900  | -2.88630400 |
| H  | 0.38811900  | -1.27836700 | 2.01284400  | H                | 6.12836800  | -0.65494600 | -2.77307300 |
| H  | -0.25460300 | -1.17621500 | 3.67305400  | H                | 7.34793300  | -0.68899500 | -0.59259500 |
| C  | -0.38082100 | 2.81789500  | 2.82462000  | H                | 6.21006900  | 0.15350600  | 1.46556400  |
| H  | -1.30342200 | 3.41150300  | 2.74007600  | H                | 3.88701300  | 1.00424300  | 1.34450600  |
| H  | -0.24175500 | 2.57144600  | 3.89028000  | C                | 2.26264600  | 1.20646700  | -0.88271000 |
| H  | 0.46429500  | 3.44889200  | 2.51239000  | C                | 1.37237600  | 0.89615900  | 0.33601700  |
| Co | -0.48295300 | -0.20043900 | -0.91733900 | O                | 1.57234000  | 1.16193900  | 1.49417000  |
| C  | 4.44827600  | -0.72778100 | 0.42228300  | H                | -0.16644700 | -1.17336100 | -3.45346600 |
| C  | 5.71710500  | -0.13651100 | 0.34587200  | C                | 1.40302100  | 0.51155400  | -1.95296900 |
| C  | 6.30308300  | 0.43992700  | 1.47720600  | H                | 1.20882300  | 1.02429900  | -2.89974400 |
| C  | 5.62366700  | 0.43856500  | 2.69928200  | H                | -0.01512400 | 1.29364800  | -1.41533500 |
| C  | 4.36035800  | -0.15655500 | 2.78530300  | C                | 2.28308800  | 2.74417100  | -1.13037300 |
| C  | 3.78044100  | -0.74283600 | 1.65753100  | H                | 1.23365000  | 3.07825300  | -1.20708400 |

|   |             |             |             |                  |             |             |             |
|---|-------------|-------------|-------------|------------------|-------------|-------------|-------------|
| H | 2.75472300  | 2.90393300  | -2.11280800 | H                | 2.45728100  | -1.35670800 | 1.53944400  |
| C | 1.25332400  | -0.87846500 | -1.83716300 | H                | 4.46661200  | -2.77764800 | 1.48269500  |
| C | 0.63610300  | -1.71109100 | -2.92557000 | H                | 4.32029500  | -5.13190800 | 0.65366700  |
| H | 1.95945500  | -1.40042700 | -1.18894200 | H                | 2.12465100  | -6.03431700 | -0.11575300 |
| H | 1.40640200  | -1.98097900 | -3.67092100 | H                | 0.10100900  | -4.61752100 | -0.05190100 |
| H | 0.22477000  | -2.65138100 | -2.53153400 | H                | -1.83345500 | -1.41798400 | -1.70182200 |
| C | 2.98728700  | 3.54747100  | -0.08052700 | H                | -1.87473200 | -4.15000600 | 1.64786300  |
| C | 4.06244700  | 4.30863200  | -0.30501400 | H                | -3.82117200 | -5.31484900 | 0.66520500  |
| H | 2.57011000  | 3.49358400  | 0.93012600  | H                | -4.78508300 | -4.54542400 | -1.50293300 |
| H | 4.53029800  | 4.88738800  | 0.49741500  | H                | -3.77617800 | -2.58932400 | -2.68479000 |
| H | 4.51282500  | 4.38304100  | -1.30131800 | H                | -3.09585800 | 3.43582500  | -0.92649500 |
| P | -1.62725900 | 1.25844200  | 0.50495800  | H                | -2.74979100 | 5.87950000  | -1.02914100 |
| C | -1.86345300 | 0.88694200  | 2.31048900  | H                | -0.92015700 | 6.94965700  | 0.28963700  |
| C | -2.07851800 | -0.61314100 | 2.60133500  | H                | 0.55366300  | 5.53642300  | 1.72853900  |
| C | -0.84338600 | -1.53029300 | 2.51957100  | H                | 0.22009700  | 3.09278100  | 1.82883400  |
| P | -0.31271000 | -1.75091300 | 0.74067800  | H                | -4.48200000 | 0.36411800  | 1.14533100  |
| C | 1.12164000  | -2.89338900 | 0.77846600  | H                | -2.04739200 | 1.28367600  | -2.31193800 |
| C | 2.36690300  | -2.38790700 | 1.19837200  | H                | -3.94845300 | 0.71289000  | -3.79231700 |
| C | 3.50793700  | -3.18966200 | 1.15900900  | H                | -6.10829100 | -0.06999600 | -2.81033700 |
| C | 3.42556600  | -4.50569400 | 0.69064200  | H                | -6.34914800 | -0.23907100 | -0.33324000 |
| C | 2.19625300  | -5.01078100 | 0.26032000  | C                | 0.27944800  | -1.11616400 | 3.47249500  |
| C | 1.04909300  | -4.21046800 | 0.30073900  | H                | 1.04060300  | -1.90402500 | 3.55792600  |
| C | -1.71184300 | -2.70035500 | 0.03644000  | H                | 0.78028800  | -0.19137600 | 3.15956400  |
| C | -2.25818000 | -2.27717800 | -1.18457900 | H                | -0.14613200 | -0.95590600 | 4.47671300  |
| C | -2.28488800 | -3.80056400 | 0.69826900  | C                | -2.90807500 | 1.76707300  | 3.00503400  |
| C | -3.38327000 | -4.46039300 | 0.14355300  | H                | -3.93605000 | 1.49903500  | 2.72333100  |
| C | -3.92254000 | -4.02933700 | -1.07415100 | H                | -2.81882300 | 1.63753900  | 4.09552800  |
| C | -3.35795000 | -2.93728700 | -1.73810600 | H                | -2.76086900 | 2.83283000  | 2.77987900  |
| C | -1.45681400 | 3.08561600  | 0.45076200  | Co               | -0.04378300 | 0.10482500  | -0.52211800 |
| C | -2.28992600 | 3.88555600  | -0.34584700 |                  |             |             |             |
| C | -2.09435400 | 5.26918900  | -0.40287500 | TS5 <sub>T</sub> |             |             |             |
| C | -1.07208600 | 5.86862100  | 0.33734500  | C                | 3.87201800  | 0.68545800  | -0.78318500 |
| C | -0.24687800 | 5.07743900  | 1.14363400  | C                | 4.38299500  | 0.26516500  | -2.02203000 |
| C | -0.43604000 | 3.69570300  | 1.20160400  | C                | 5.61896300  | -0.38123300 | -2.10574100 |
| C | -3.12564100 | 0.87867700  | -0.47391200 | C                | 6.36875700  | -0.61938400 | -0.94940300 |
| C | -4.34469900 | 0.44589700  | 0.06905300  | C                | 5.87586100  | -0.19335500 | 0.28712200  |
| C | -2.99613200 | 0.96471900  | -1.87450900 | C                | 4.64145300  | 0.45843500  | 0.36867900  |
| C | -4.06496300 | 0.63764500  | -2.70863900 | H                | 3.80921900  | 0.44288400  | -2.93402200 |
| C | -5.27419800 | 0.19984000  | -2.15819000 | H                | 5.99585200  | -0.70260600 | -3.08009800 |
| C | -5.40899100 | 0.10434300  | -0.77108900 | H                | 7.33236200  | -1.13090300 | -1.01300800 |
| H | -0.87552600 | 1.17002900  | 2.70845400  | H                | 6.45352800  | -0.36862000 | 1.19826800  |
| H | -2.88348300 | -1.01781800 | 1.96993900  | H                | 4.26888700  | 0.78832000  | 1.33821200  |
| H | -2.44835800 | -0.68391300 | 3.63740800  | C                | 2.54467200  | 1.42329900  | -0.71088700 |
| H | -1.17907900 | -2.53452300 | 2.82114300  | C                | 1.74462000  | 1.15687600  | 0.60817100  |

|   |             |             |             |                |             |             |             |
|---|-------------|-------------|-------------|----------------|-------------|-------------|-------------|
| O | 2.06220800  | 1.55631100  | 1.70443600  | C              | -4.08465600 | 0.52082900  | -2.88126300 |
| H | -0.27916100 | -0.31570200 | -3.45585400 | C              | -5.22500400 | -0.14584100 | -2.41769100 |
| C | 1.50082000  | 0.94989400  | -1.74585900 | C              | -5.36864900 | -0.40595000 | -1.05320000 |
| H | 1.21732400  | 1.64251900  | -2.54630600 | H              | -1.22619000 | 1.25436400  | 2.69510900  |
| H | 0.34063500  | 1.57659000  | -0.85392200 | H              | -2.92917200 | -1.21553000 | 2.04087700  |
| C | 2.74458600  | 2.95989100  | -0.88121000 | H              | -2.45784300 | -0.75388400 | 3.66648500  |
| H | 1.74753100  | 3.42999700  | -0.79811500 | H              | -1.04060500 | -2.49949600 | 2.91092400  |
| H | 3.09962800  | 3.12739500  | -1.91084100 | H              | 2.53316700  | -1.32975200 | 1.12385300  |
| C | 1.26237300  | -0.41906800 | -1.92846400 | H              | 4.50785100  | -2.81377100 | 1.15834300  |
| C | 0.55744500  | -0.95747900 | -3.14053100 | H              | 4.22779400  | -5.27825200 | 0.83374600  |
| H | 1.92806800  | -1.11580200 | -1.41042900 | H              | 1.94832800  | -6.22580700 | 0.47461700  |
| H | 1.27155400  | -1.01214600 | -3.98279800 | H              | -0.02958200 | -4.74393100 | 0.44119900  |
| H | 0.18001500  | -1.97491400 | -2.97391200 | H              | -1.57998900 | -1.53500400 | -1.82797400 |
| C | 3.68304300  | 3.59637700  | 0.09764400  | H              | -2.10455500 | -3.94927900 | 1.71219400  |
| C | 4.84772100  | 4.16345800  | -0.23134300 | H              | -3.98892400 | -5.12392200 | 0.62709600  |
| H | 3.37063900  | 3.57299800  | 1.14655900  | H              | -4.66425200 | -4.53821200 | -1.70123200 |
| H | 5.49431300  | 4.62053500  | 0.52428000  | H              | -3.44533800 | -2.73804300 | -2.93060400 |
| H | 5.19813600  | 4.19098500  | -1.26945300 | H              | -3.79318400 | 3.24381500  | -0.54272800 |
| P | -1.84227300 | 1.18833200  | 0.44645700  | H              | -3.73177000 | 5.71959200  | -0.51643900 |
| C | -2.13031200 | 0.80337800  | 2.25319400  | H              | -1.77976900 | 6.91819400  | 0.47171300  |
| C | -2.14427100 | -0.69735700 | 2.61068500  | H              | 0.11672300  | 5.61162500  | 1.43938500  |
| C | -0.82537300 | -1.49139000 | 2.52253000  | H              | 0.06910300  | 3.13791300  | 1.40113100  |
| P | -0.29913400 | -1.76176400 | 0.75294900  | H              | -4.51896600 | -0.22117900 | 0.90974400  |
| C | 1.10967100  | -2.93183600 | 0.80243700  | H              | -2.20125000 | 1.42678900  | -2.35321500 |
| C | 2.39857700  | -2.40377700 | 0.99585200  | H              | -3.96046400 | 0.72195700  | -3.94800400 |
| C | 3.51367100  | -3.24278400 | 1.01346000  | H              | -5.99503600 | -0.46927400 | -3.12207400 |
| C | 3.35528700  | -4.62033500 | 0.82847200  | H              | -6.25063800 | -0.93520800 | -0.68513700 |
| C | 2.07787300  | -5.15146500 | 0.62694300  | C              | 0.30358300  | -0.89106900 | 3.36188300  |
| C | 0.95812600  | -4.31396700 | 0.61122700  | H              | 1.16619400  | -1.57126500 | 3.41320200  |
| C | -1.69523200 | -2.67012600 | 0.00215000  | H              | 0.66165200  | 0.07064200  | 2.96823600  |
| C | -2.09139600 | -2.33629100 | -1.30068700 | H              | -0.05597900 | -0.73005100 | 4.39129400  |
| C | -2.38974000 | -3.67747500 | 0.69445200  | C              | -3.34414200 | 1.53142400  | 2.84107600  |
| C | -3.45368800 | -4.34305100 | 0.08149700  | H              | -4.29462400 | 1.10750400  | 2.48766900  |
| C | -3.83146300 | -4.01466800 | -1.22534900 | H              | -3.32549700 | 1.43738500  | 3.93865200  |
| C | -3.14807200 | -3.01074500 | -1.91609800 | H              | -3.33670200 | 2.60249700  | 2.59444300  |
| C | -1.86165300 | 3.01984300  | 0.41658600  | Co             | 0.15622900  | 0.23513200  | -0.18615200 |
| C | -2.93040200 | 3.75627200  | -0.11453000 |                |             |             |             |
| C | -2.89624600 | 5.15438500  | -0.09614900 | 5 <sub>s</sub> |             |             |             |
| C | -1.80339800 | 5.82575200  | 0.45921900  | C              | 3.62977500  | 0.96362700  | -0.67638200 |
| C | -0.74014300 | 5.09440400  | 1.00081000  | C              | 4.43228200  | 0.40657000  | -1.68504900 |
| C | -0.76550400 | 3.69871700  | 0.97751600  | C              | 5.75812200  | 0.04673400  | -1.43113100 |
| C | -3.24198900 | 0.67403000  | -0.60367900 | C              | 6.30915000  | 0.23773500  | -0.16034400 |
| C | -4.38503500 | 0.00231500  | -0.14698400 | C              | 5.52405200  | 0.80534400  | 0.84679000  |
| C | -3.09637300 | 0.92019700  | -1.98257700 | C              | 4.19968300  | 1.17173300  | 0.58909400  |

|   |             |             |             |    |             |             |             |
|---|-------------|-------------|-------------|----|-------------|-------------|-------------|
| H | 4.01864400  | 0.24506700  | -2.68205400 | C  | -3.17201100 | 4.89792600  | -0.35978200 |
| H | 6.36134100  | -0.38930600 | -2.23153800 | C  | -2.21337200 | 5.70393900  | 0.25908200  |
| H | 7.34321500  | -0.05209400 | 0.04198900  | C  | -1.15196700 | 5.10934000  | 0.94990100  |
| H | 5.94172000  | 0.96516500  | 1.84405600  | C  | -1.04500700 | 3.71898200  | 1.01457800  |
| H | 3.59858400  | 1.61101300  | 1.38364500  | C  | -3.24352500 | 0.39617400  | -0.44348400 |
| C | 2.19842200  | 1.39362400  | -0.99325900 | C  | -4.30391100 | -0.30118300 | 0.15436100  |
| C | 1.22201400  | 1.21468700  | 0.19083400  | C  | -3.21602900 | 0.52662500  | -1.84609700 |
| O | 1.33121200  | 1.67919900  | 1.29910700  | C  | -4.23675200 | -0.01454200 | -2.62754000 |
| H | 0.22522800  | -1.20277400 | -3.71146600 | C  | -5.28934100 | -0.70994400 | -2.02320300 |
| C | 1.51997900  | 0.53947300  | -2.07440500 | C  | -5.31825300 | -0.85205700 | -0.63393500 |
| H | 1.14537200  | 1.04679100  | -2.96669200 | H  | -1.04383700 | 1.23430000  | 2.66731700  |
| H | -0.41467400 | 1.43149300  | -1.35274300 | H  | -2.64079700 | -1.32865600 | 2.12694400  |
| C | 2.15725200  | 2.89139100  | -1.43836100 | H  | -2.16271700 | -0.82383300 | 3.73726600  |
| H | 1.10463300  | 3.12721600  | -1.67239400 | H  | -0.64697500 | -2.47588300 | 2.91515100  |
| H | 2.73051800  | 2.95676300  | -2.37641800 | H  | 2.70929500  | -0.97573000 | 1.46175600  |
| C | 1.50340800  | -0.82467900 | -2.00378300 | H  | 4.84547600  | -2.19164000 | 1.36337900  |
| C | 0.95937800  | -1.71775900 | -3.07406400 | H  | 4.90804100  | -4.56467100 | 0.57424200  |
| H | 2.10830600  | -1.30751300 | -1.23439000 | H  | 2.78808500  | -5.69450100 | -0.10261800 |
| H | 1.79188200  | -2.05945900 | -3.71540300 | H  | 0.63809600  | -4.48301700 | 0.00690300  |
| H | 0.49690000  | -2.62051000 | -2.65031400 | H  | -1.50475100 | -1.68491200 | -1.73481100 |
| C | 2.68212200  | 3.87682400  | -0.44015700 | H  | -1.40619300 | -4.11057300 | 1.83997700  |
| C | 3.78263100  | 4.61489800  | -0.61426900 | H  | -3.18526800 | -5.55044700 | 0.90479500  |
| H | 2.10748300  | 3.98153900  | 0.48595100  | H  | -4.12219400 | -5.08301200 | -1.35905000 |
| H | 4.11783900  | 5.32958200  | 0.14382300  | H  | -3.26476100 | -3.14503600 | -2.68047000 |
| H | 4.38909500  | 4.53095000  | -1.52311300 | H  | -3.83259900 | 2.89225000  | -0.78047600 |
| P | -1.81915400 | 1.07834300  | 0.47718800  | H  | -4.01029400 | 5.35244600  | -0.89350400 |
| C | -1.95855100 | 0.74020400  | 2.30059900  | H  | -2.29488200 | 6.79244000  | 0.20831600  |
| C | -1.88071500 | -0.75291000 | 2.67371000  | H  | -0.39972200 | 5.73020800  | 1.44268900  |
| C | -0.51274300 | -1.44736200 | 2.54557500  | H  | -0.21372900 | 3.26902700  | 1.55612800  |
| P | -0.03798300 | -1.66056600 | 0.75242200  | H  | -4.35324500 | -0.42873300 | 1.23347300  |
| C | 1.50898400  | -2.64935500 | 0.77212200  | H  | -2.39208400 | 1.05728900  | -2.32693300 |
| C | 2.71033200  | -2.01735500 | 1.14334600  | H  | -4.20476800 | 0.10008900  | -3.71354800 |
| C | 3.92341500  | -2.70361500 | 1.07915300  | H  | -6.08339800 | -1.14368900 | -2.63564800 |
| C | 3.95723500  | -4.02943400 | 0.63331900  | H  | -6.13448200 | -1.39685500 | -0.15399300 |
| C | 2.77041800  | -4.66171400 | 0.25409700  | C  | 0.57488700  | -0.78608500 | 3.39494400  |
| C | 1.55207800  | -3.97703100 | 0.31946500  | H  | 1.46186600  | -1.42852600 | 3.48018200  |
| C | -1.32686100 | -2.79447200 | 0.11297100  | H  | 0.89203100  | 0.18312700  | 2.98886800  |
| C | -1.86059300 | -2.53876700 | -1.15893100 | H  | 0.18464900  | -0.62305400 | 4.41283600  |
| C | -1.81184800 | -3.88723100 | 0.85146800  | C  | -3.15251300 | 1.43504600  | 2.96598800  |
| C | -2.81324200 | -4.70414800 | 0.32225600  | H  | -4.11210300 | 0.97328600  | 2.69432400  |
| C | -3.33734100 | -4.44269300 | -0.94897100 | H  | -3.04518500 | 1.35993200  | 4.05987100  |
| C | -2.85734200 | -3.36033400 | -1.69071800 | H  | -3.20229700 | 2.50135300  | 2.70557300  |
| C | -2.00052100 | 2.90344300  | 0.38233700  | Co | -0.09805000 | 0.21618700  | -0.57130000 |
| C | -3.07028600 | 3.50431800  | -0.29775900 |    |             |             |             |

|                |             |             |             |   |             |             |             |
|----------------|-------------|-------------|-------------|---|-------------|-------------|-------------|
| 6 <sub>s</sub> |             |             |             | C | 3.33850500  | -0.95925200 | -1.36121400 |
| C              | -3.51783200 | 1.36255400  | -0.93483500 | C | 4.43168000  | -0.59577700 | 0.76164600  |
| C              | -4.45715100 | 1.51741900  | 0.09882600  | C | 5.47397700  | -1.43707400 | 0.36465000  |
| C              | -5.67210400 | 0.83107300  | 0.07517700  | C | 5.45421100  | -2.03817500 | -0.89747500 |
| C              | -5.96707000 | -0.04248400 | -0.97647100 | C | 4.38341400  | -1.79465100 | -1.76102400 |
| C              | -5.03551600 | -0.21712500 | -2.00203000 | C | -2.00069300 | -2.30292100 | 0.72808200  |
| C              | -3.82240900 | 0.47964700  | -1.98216200 | C | -2.26932400 | -3.56310400 | 0.17172200  |
| H              | -4.23093600 | 2.18621900  | 0.93008600  | C | -3.55957700 | -4.09910800 | 0.22990500  |
| H              | -6.38951300 | 0.97444100  | 0.88712600  | C | -4.59016500 | -3.38997700 | 0.85133000  |
| H              | -6.91449600 | -0.58660100 | -0.99298900 | C | -4.32467300 | -2.13825300 | 1.41595200  |
| H              | -5.24983800 | -0.89896500 | -2.82877300 | C | -3.04131000 | -1.59360700 | 1.35389500  |
| H              | -3.12205700 | 0.32561500  | -2.80159700 | C | 0.72571000  | -2.82824300 | -0.15853000 |
| C              | -2.17952400 | 2.11452400  | -0.85405400 | C | 1.69416800  | -3.60670700 | 0.49340500  |
| C              | -1.30123200 | 1.20370000  | 0.07776000  | C | 0.56709700  | -2.96056200 | -1.55241000 |
| O              | -1.56088900 | 1.14910000  | 1.25752800  | C | 1.34577500  | -3.86723500 | -2.27193700 |
| H              | -2.74762100 | 6.02595800  | 0.51891900  | C | 2.30678900  | -4.64025200 | -1.61346300 |
| C              | -2.39917500 | 3.50568900  | -0.28207200 | C | 2.48066100  | -4.50423100 | -0.23352400 |
| H              | -3.03592500 | 4.12163300  | -0.93084200 | H | -0.57065000 | -0.54329200 | 2.73041000  |
| H              | -1.26504700 | -0.45326300 | -1.24560800 | H | 2.29400200  | -1.53653500 | 2.27095300  |
| C              | -1.49215300 | 2.30756300  | -2.23003500 | H | 1.72251500  | -0.84829200 | 3.78009800  |
| H              | -0.84912700 | 3.19493200  | -2.14998200 | H | 2.95687800  | 0.77538700  | 2.51130900  |
| H              | -2.25655800 | 2.52785200  | -2.98976300 | H | 0.54223200  | 3.27096400  | 0.02825700  |
| C              | -1.88408400 | 4.06123000  | 0.81988100  | H | 1.28533000  | 5.60337200  | -0.28287100 |
| C              | -2.10633200 | 5.48456700  | 1.23191800  | H | 3.72477700  | 6.13417700  | -0.42361600 |
| H              | -1.25611000 | 3.46214500  | 1.48394900  | H | 5.40129500  | 4.29516300  | -0.24156100 |
| H              | -2.57296600 | 5.54069400  | 2.23125500  | H | 4.66081800  | 1.95855400  | 0.08253200  |
| H              | -1.14506900 | 6.02283800  | 1.31052400  | H | 2.49881900  | -0.79924800 | -2.03373100 |
| C              | -0.62604000 | 1.16148500  | -2.67743400 | H | 4.47776500  | -0.13797400 | 1.75010000  |
| C              | 0.73427500  | 1.22347200  | -2.55349500 | H | 6.30587300  | -1.62250500 | 1.04841100  |
| H              | -1.07136900 | 0.36128400  | -3.27239900 | H | 6.26886100  | -2.69891000 | -1.20376600 |
| H              | 1.36117200  | 0.46013100  | -3.02178600 | H | 4.35010100  | -2.26682700 | -2.74509200 |
| H              | 1.23104800  | 2.13285900  | -2.21319100 | H | -1.47492200 | -4.13634800 | -0.30649500 |
| P              | -0.31894500 | -1.57033000 | 0.66048400  | H | -3.75438000 | -5.08044800 | -0.20974800 |
| C              | 0.13301100  | -1.34252900 | 2.45070100  | H | -5.59761100 | -3.81064000 | 0.89728400  |
| C              | 1.56487900  | -0.82813800 | 2.68867700  | H | -5.12303200 | -1.57537300 | 1.90356600  |
| C              | 1.90891600  | 0.59840200  | 2.22690000  | H | -2.85313200 | -0.61300300 | 1.78950400  |
| P              | 1.93346200  | 0.73740100  | 0.36286200  | H | 1.84796000  | -3.52350400 | 1.56743000  |
| C              | 2.54729700  | 2.44836200  | 0.09150800  | H | -0.17529500 | -2.35035400 | -2.07244000 |
| C              | 1.60890300  | 3.48772800  | -0.02069100 | H | 1.20708600  | -3.96271300 | -3.35136700 |
| C              | 2.02897400  | 4.80717100  | -0.19843700 | H | 2.92439600  | -5.34404800 | -2.17645700 |
| C              | 3.39407900  | 5.10294200  | -0.27762900 | H | 3.23476900  | -5.09996300 | 0.28588100  |
| C              | 4.33338600  | 4.07265100  | -0.17553200 | C | 1.07826200  | 1.68227700  | 2.91635300  |
| C              | 3.91476900  | 2.75087300  | 0.00836200  | H | 1.43266400  | 2.68887600  | 2.65204400  |
| C              | 3.34817000  | -0.34629100 | -0.09936800 | H | 0.01410500  | 1.61662100  | 2.66603900  |

|                  |             |             |             |   |             |             |             |
|------------------|-------------|-------------|-------------|---|-------------|-------------|-------------|
| H                | 1.18446300  | 1.56929000  | 4.00764500  | C | 2.75952400  | 2.36079500  | 0.35043900  |
| C                | -0.17396200 | -2.56678200 | 3.32062900  | C | 1.91408400  | 3.47004100  | 0.52456500  |
| H                | 0.50715600  | -3.40573900 | 3.11916500  | C | 2.41183000  | 4.76771700  | 0.39896200  |
| H                | -0.05581100 | -2.29000300 | 4.38049700  | C | 3.75981300  | 4.97342900  | 0.08457900  |
| H                | -1.20383100 | -2.92223300 | 3.17999700  | C | 4.60340300  | 3.87496200  | -0.10151200 |
| Co               | -0.01885000 | 0.12273300  | -0.72259500 | C | 4.10866100  | 2.57291600  | 0.03005600  |
|                  |             |             |             | C | 3.31729900  | -0.47456700 | -0.09698800 |
| TS6 <sub>s</sub> |             |             |             | C | 3.13027600  | -1.09887800 | -1.34273800 |
| C                | -3.51617900 | 1.41663400  | -0.88587100 | C | 4.46476800  | -0.78423300 | 0.65290900  |
| C                | -4.42096000 | 2.03738800  | -0.01316800 | C | 5.40260100  | -1.69755000 | 0.16570200  |
| C                | -5.69077700 | 1.49515700  | 0.20989700  | C | 5.20876200  | -2.31076600 | -1.07632300 |
| C                | -6.07624600 | 0.31497800  | -0.43022200 | C | 4.07161400  | -2.00815000 | -1.82998900 |
| C                | -5.16980500 | -0.33218200 | -1.27438400 | C | -2.13388600 | -2.07698500 | 0.69651200  |
| C                | -3.90081500 | 0.20721700  | -1.49017000 | C | -2.60993600 | -3.24554900 | 0.08451900  |
| H                | -4.13607700 | 2.96377000  | 0.48620200  | C | -3.94030400 | -3.64153600 | 0.25895300  |
| H                | -6.38360700 | 2.00531900  | 0.88416500  | C | -4.80220800 | -2.88488600 | 1.05541400  |
| H                | -7.06962600 | -0.10730900 | -0.26010900 | C | -4.33423000 | -1.71540900 | 1.66279800  |
| H                | -5.44447500 | -1.27190800 | -1.75871700 | C | -3.01421300 | -1.30579400 | 1.47845900  |
| H                | -3.20521000 | -0.32986700 | -2.13577100 | C | 0.50607000  | -2.93194800 | -0.25080800 |
| C                | -2.11681100 | 2.01685100  | -1.13747700 | C | 1.43686100  | -3.77263800 | 0.37862500  |
| C                | -1.18603800 | 1.29198900  | -0.06893400 | C | 0.28858000  | -3.07541700 | -1.63515200 |
| O                | -1.43012800 | 1.45047700  | 1.10373500  | C | 0.97146100  | -4.04880200 | -2.36515300 |
| H                | -2.16515200 | 6.17728500  | -0.67429600 | C | 1.89955100  | -4.87940600 | -1.72902300 |
| C                | -2.11804000 | 3.52218100  | -0.89956400 | C | 2.13075500  | -4.73602100 | -0.35882400 |
| H                | -2.58838000 | 4.06896800  | -1.72659900 | H | -0.53706800 | -0.62794300 | 2.72043500  |
| H                | -0.87373600 | -0.24705300 | -1.76293600 | H | 2.24571700  | -1.77675400 | 2.15245700  |
| C                | -1.67066200 | 1.76672600  | -2.61335100 | H | 1.73005700  | -1.22710100 | 3.73630400  |
| H                | -1.53371600 | 2.73685200  | -3.11322700 | H | 3.03884100  | 0.46569500  | 2.68486300  |
| H                | -2.45898000 | 1.24928500  | -3.16846600 | H | 0.85904800  | 3.31954700  | 0.74919700  |
| C                | -1.64739400 | 4.23333900  | 0.13074400  | H | 1.74081700  | 5.61865900  | 0.53872000  |
| C                | -1.69420700 | 5.72832100  | 0.21408200  | H | 4.14966900  | 5.98881800  | -0.02071100 |
| H                | -1.20629200 | 3.71768700  | 0.98689000  | H | 5.65561400  | 4.02791300  | -0.35395300 |
| H                | -2.25386400 | 6.05632200  | 1.10776100  | H | 4.77967900  | 1.72705300  | -0.12428100 |
| H                | -0.67748700 | 6.14748000  | 0.31648300  | H | 2.23898200  | -0.88930500 | -1.93730100 |
| C                | -0.37473100 | 1.00488600  | -2.75233000 | H | 4.63591700  | -0.31316500 | 1.62213700  |
| C                | 0.81225300  | 1.56643900  | -2.24810000 | H | 6.28947300  | -1.93002200 | 0.76017200  |
| H                | -0.30584900 | 0.27474200  | -3.56550400 | H | 5.94230500  | -3.02727800 | -1.45388800 |
| H                | 1.78181300  | 1.21351200  | -2.60859900 | H | 3.90739600  | -2.48891300 | -2.79646100 |
| H                | 0.79302800  | 2.56940800  | -1.81549600 | H | -1.94550700 | -3.86464400 | -0.51911200 |
| P                | -0.37586800 | -1.56065500 | 0.58363800  | H | -4.29657200 | -4.55527500 | -0.22314500 |
| C                | 0.09777400  | -1.46458200 | 2.38803300  | H | -5.83892800 | -3.19976500 | 1.19663400  |
| C                | 1.56458700  | -1.07699700 | 2.65654300  | H | -5.00495000 | -1.10847900 | 2.27440200  |
| C                | 1.99250900  | 0.37005100  | 2.35569200  | H | -2.67257100 | -0.38110800 | 1.94337500  |
| P                | 2.03438900  | 0.68640800  | 0.52084700  | H | 1.64025000  | -3.68422900 | 1.44343100  |

|                  |             |             |             |   |             |             |             |
|------------------|-------------|-------------|-------------|---|-------------|-------------|-------------|
| H                | -0.41920700 | -2.41742900 | -2.14366100 | H | 0.84766300  | -0.40140300 | -2.99483200 |
| H                | 0.78623800  | -4.15015800 | -3.43713700 | H | 0.68310400  | 1.43951400  | -2.73709900 |
| H                | 2.44563400  | -5.63262400 | -2.30197100 | P | 0.16112600  | -1.76670900 | 0.60828700  |
| H                | 2.85889700  | -5.37557300 | 0.14543900  | C | 0.64677800  | -1.54162000 | 2.40135300  |
| C                | 1.16780100  | 1.41538600  | 3.11049500  | C | 1.92534600  | -0.70933000 | 2.63526000  |
| H                | 1.62984400  | 2.41063200  | 3.04777200  | C | 1.92060000  | 0.79220500  | 2.28487100  |
| H                | 0.14380900  | 1.48974500  | 2.72296400  | P | 1.89822000  | 1.09224000  | 0.44716600  |
| H                | 1.11934800  | 1.13687600  | 4.17591500  | C | 2.09407800  | 2.89904900  | 0.24328400  |
| C                | -0.30812500 | -2.70134800 | 3.19969700  | C | 1.00041100  | 3.62440200  | -0.25400400 |
| H                | 0.32829000  | -3.57074700 | 2.98351000  | C | 1.07947500  | 5.01238800  | -0.39551100 |
| H                | -0.20459000 | -2.47416400 | 4.27286300  | C | 2.25521900  | 5.68220300  | -0.04470100 |
| H                | -1.35164800 | -2.99132600 | 3.01743200  | C | 3.35104400  | 4.96221600  | 0.44675900  |
| Co               | 0.17127400  | 0.18236600  | -0.68114400 | C | 3.27462200  | 3.57497800  | 0.59125900  |
|                  |             |             |             | C | 3.45373100  | 0.33113900  | -0.15897100 |
|                  |             |             |             | C | 3.49184800  | -0.21846700 | -1.44914300 |
| TS6 <sub>T</sub> |             |             |             | C | 4.61232200  | 0.28109900  | 0.63653900  |
| C                | -3.98704900 | 0.82495900  | -0.78229900 | C | 5.78047000  | -0.30619700 | 0.14462500  |
| C                | -4.84246000 | 1.06681500  | 0.30865600  | C | 5.80911400  | -0.84764300 | -1.14437600 |
| C                | -5.96630300 | 0.27150200  | 0.53207800  | C | 4.66212100  | -0.79984700 | -1.94109900 |
| C                | -6.26169000 | -0.79090500 | -0.33078400 | C | -1.36433900 | -2.77340500 | 0.71161200  |
| C                | -5.42067100 | -1.04335800 | -1.41538000 | C | -1.42066400 | -4.11858900 | 0.31815000  |
| C                | -4.29321100 | -0.24398700 | -1.63827200 | C | -2.62109800 | -4.82919300 | 0.41829500  |
| H                | -4.61608900 | 1.88755600  | 0.98954100  | C | -3.76851500 | -4.20800400 | 0.91991800  |
| H                | -6.61668500 | 0.48199200  | 1.38502700  | C | -3.71467200 | -2.86869800 | 1.32176700  |
| H                | -7.13972800 | -1.41716400 | -0.15490000 | C | -2.52227400 | -2.15112100 | 1.21284200  |
| H                | -5.63552600 | -1.87030600 | -2.09676300 | C | 1.37291100  | -2.78410100 | -0.30276300 |
| H                | -3.66217000 | -0.47095700 | -2.49614400 | C | 2.57542700  | -3.27228200 | 0.23005900  |
| C                | -2.73456200 | 1.69759700  | -0.94720100 | C | 1.09886000  | -2.98908600 | -1.66905100 |
| C                | -1.75617200 | 1.20458400  | 0.18064700  | C | 2.00340400  | -3.67553100 | -2.47890700 |
| O                | -2.05200700 | 1.28961200  | 1.35019800  | C | 3.20431500  | -4.15236200 | -1.94069500 |
| H                | -3.67667900 | 5.76688700  | -0.68697400 | C | 3.48569100  | -3.94876100 | -0.58797900 |
| C                | -3.09021400 | 3.16551200  | -0.80541300 | H | -0.21473200 | -0.95818100 | 2.76705300  |
| H                | -3.77108600 | 3.52293200  | -1.58916600 | H | 2.78518500  | -1.19530900 | 2.15333900  |
| H                | -1.34332800 | -0.27516400 | -1.04582900 | H | 2.12482700  | -0.76373800 | 3.71864700  |
| C                | -2.01537500 | 1.50472700  | -2.30692200 | H | 2.88597200  | 1.19595000  | 2.62800900  |
| H                | -1.38049800 | 2.38656000  | -2.47077600 | H | 0.08419400  | 3.09653300  | -0.52500900 |
| H                | -2.75067400 | 1.48291900  | -3.12453400 | H | 0.22089600  | 5.56700900  | -0.78139200 |
| C                | -2.64339200 | 4.03655700  | 0.10690900  | H | 2.32104700  | 6.76728000  | -0.15646800 |
| C                | -3.00778200 | 5.48908000  | 0.14258300  | H | 4.27135500  | 5.48498500  | 0.71860000  |
| H                | -1.97159200 | 3.69106500  | 0.89794500  | H | 4.13581400  | 3.02250700  | 0.97244400  |
| H                | -3.50760700 | 5.74814400  | 1.09279200  | H | 2.59691700  | -0.20494400 | -2.06527800 |
| H                | -2.10468600 | 6.12215000  | 0.08792300  | H | 4.61520800  | 0.69571900  | 1.64531300  |
| C                | -1.11854200 | 0.26997600  | -2.38898200 | H | 6.67236600  | -0.34077900 | 0.77487800  |
| C                | 0.26211600  | 0.43812700  | -2.61617500 | H | 6.72309800  | -1.31053700 | -1.52431600 |
| H                | -1.56286700 | -0.66286600 | -2.75856100 |   |             |             |             |



|    |             |             |             |   |             |             |             |
|----|-------------|-------------|-------------|---|-------------|-------------|-------------|
| H  | 4.67046400  | -1.22792800 | -2.94580500 | C | -2.35229000 | 5.16819500  | 0.41788100  |
| H  | -0.52926800 | -4.61700100 | -0.06626200 | H | -2.66055600 | 3.11514400  | 1.17604500  |
| H  | -2.65579700 | -5.87584700 | 0.10577300  | H | -3.31998500 | 5.58851100  | 0.74577800  |
| H  | -4.70485700 | -4.76603900 | 0.99712000  | H | -1.62230700 | 5.43650700  | 1.20017400  |
| H  | -4.60685200 | -2.37474700 | 1.71191300  | C | -0.72892500 | 0.62979000  | -2.69969300 |
| H  | -2.49389100 | -1.10452300 | 1.52076500  | C | 0.31057100  | 1.51685300  | -2.11832300 |
| H  | 2.82186800  | -3.12703300 | 1.27998000  | H | -0.50148900 | 0.24976500  | -3.70837900 |
| H  | 0.16953400  | -2.60751900 | -2.09921600 | H | 1.30114500  | 1.46781300  | -2.58947300 |
| H  | 1.77495900  | -3.82960700 | -3.53624000 | H | 0.02115400  | 2.54687200  | -1.89126000 |
| H  | 3.92018500  | -4.67773500 | -2.57736500 | P | 0.04483600  | -1.72588700 | 0.53792500  |
| H  | 4.42239100  | -4.31410000 | -0.16063100 | C | 0.38725900  | -1.49716700 | 2.36066300  |
| C  | 0.80829300  | 1.58141200  | 2.97615800  | C | 1.67595800  | -0.71572200 | 2.67959900  |
| H  | 0.93752300  | 2.66369700  | 2.82580900  | C | 1.71621800  | 0.78789600  | 2.35354300  |
| H  | -0.18903800 | 1.30980800  | 2.60544400  | P | 1.72530900  | 1.08554500  | 0.51721700  |
| H  | 0.84154000  | 1.38668400  | 4.06047000  | C | 2.10550000  | 2.86627100  | 0.31793300  |
| C  | 0.68593700  | -2.85334200 | 3.19234700  | C | 1.07334300  | 3.80401700  | 0.48675500  |
| H  | 1.55157600  | -3.47584600 | 2.92383500  | C | 1.32886500  | 5.16832600  | 0.33473000  |
| H  | 0.76012000  | -2.62832800 | 4.26855900  | C | 2.61403400  | 5.61083100  | 0.00321700  |
| H  | -0.22401600 | -3.44959700 | 3.03476000  | C | 3.64222700  | 4.68202200  | -0.17578100 |
| Co | -0.06611700 | 0.31552900  | -0.42036300 | C | 3.39188100  | 3.31522800  | -0.01988500 |
|    |             |             |             | C | 3.25249000  | 0.22627400  | -0.04999000 |
| 7s |             |             |             | C | 3.28702700  | -0.34402200 | -1.33353100 |
| C  | -3.90218700 | 1.01254000  | -0.73419900 | C | 4.39019300  | 0.11864800  | 0.76884700  |
| C  | -4.97121500 | 1.86277900  | -0.42402600 | C | 5.53011700  | -0.54739600 | 0.31377400  |
| C  | -6.25152800 | 1.34899600  | -0.18223600 | C | 5.55333100  | -1.11083800 | -0.96591600 |
| C  | -6.48542400 | -0.02563300 | -0.24494700 | C | 4.42996000  | -1.00448700 | -1.78919200 |
| C  | -5.42491100 | -0.88531500 | -0.55317400 | C | -1.49225900 | -2.73636200 | 0.56685900  |
| C  | -4.15231600 | -0.36943800 | -0.79619000 | C | -1.62370500 | -3.92314500 | -0.17091500 |
| H  | -4.81373700 | 2.93949300  | -0.37804800 | C | -2.80606600 | -4.66740600 | -0.10960700 |
| H  | -7.06968900 | 2.03518500  | 0.05198800  | C | -3.86444100 | -4.24572600 | 0.69954000  |
| H  | -7.48458800 | -0.42661600 | -0.05707400 | C | -3.73922900 | -3.06499500 | 1.43784800  |
| H  | -5.58681000 | -1.96399100 | -0.60139200 | C | -2.56897500 | -2.30860500 | 1.36493300  |
| H  | -3.33677400 | -1.05415200 | -1.03676500 | C | 1.29921800  | -2.79376700 | -0.26360200 |
| C  | -2.48996600 | 1.51545900  | -1.07902800 | C | 2.35953500  | -3.43530900 | 0.39370500  |
| C  | -1.46499200 | 0.86754200  | -0.03297200 | C | 1.19877700  | -2.90817400 | -1.66418200 |
| O  | -1.77210200 | 0.82784000  | 1.13254000  | C | 2.11351100  | -3.67668700 | -2.38385900 |
| H  | -2.06145900 | 5.66348600  | -0.52109400 | C | 3.16513500  | -4.31566900 | -1.71926400 |
| C  | -2.32412600 | 3.02178500  | -0.89286300 | C | 3.28938400  | -4.18482200 | -0.33385000 |
| H  | -2.10724900 | 3.58882700  | -1.80419200 | H | -0.46868200 | -0.86638500 | 2.64737700  |
| H  | -0.73826200 | -0.41299300 | -2.14346800 | H | 2.54184000  | -1.21909000 | 2.22710600  |
| C  | -2.16262000 | 1.10812800  | -2.54112900 | H | 1.82278200  | -0.79356400 | 3.76974700  |
| H  | -2.34691300 | 1.96495300  | -3.20661800 | H | 2.69884400  | 1.15673500  | 2.68653200  |
| H  | -2.83687300 | 0.30648500  | -2.86610300 | H | 0.06417600  | 3.46522300  | 0.72028500  |
| C  | -2.45197400 | 3.68421200  | 0.26340800  | H | 0.51869100  | 5.88767300  | 0.46752200  |

|                |             |             |             |   |             |             |             |
|----------------|-------------|-------------|-------------|---|-------------|-------------|-------------|
| H              | 2.81095300  | 6.67856200  | -0.12070200 | C | -2.54689500 | 3.37666400  | -1.41185200 |
| H              | 4.64755000  | 5.01835200  | -0.44119400 | H | -3.21017400 | 3.59938600  | -2.25764300 |
| H              | 4.20358800  | 2.60268700  | -0.16812200 | H | 0.03795600  | 1.23060900  | -3.62676900 |
| H              | 2.41659800  | -0.28196300 | -1.98616900 | C | -1.78707800 | 1.25866900  | -2.49133700 |
| H              | 4.40124300  | 0.55746100  | 1.76715600  | H | -2.50259000 | 1.37353300  | -3.31903200 |
| H              | 6.40481200  | -0.62426300 | 0.96403400  | H | -1.65649100 | 0.17501000  | -2.32184000 |
| H              | 6.44497300  | -1.63475900 | -1.31860700 | C | -2.01229100 | 4.39040300  | -0.72284800 |
| H              | 4.43456200  | -1.44645300 | -2.78741000 | C | -2.24864700 | 5.83899800  | -1.02232900 |
| H              | -0.80177700 | -4.28226000 | -0.79068100 | H | -1.35769500 | 4.17778000  | 0.12827600  |
| H              | -2.89174100 | -5.58881700 | -0.69094000 | H | -2.69011300 | 6.35527600  | -0.15155500 |
| H              | -4.78439700 | -4.83291000 | 0.75313300  | H | -1.29659700 | 6.35603500  | -1.23686500 |
| H              | -4.56405200 | -2.71900100 | 2.06477800  | C | -0.42176500 | 1.86399900  | -2.85117500 |
| H              | -2.50181400 | -1.37694600 | 1.92672700  | C | 0.51283200  | 1.97936800  | -1.64655700 |
| H              | 2.48047100  | -3.35501400 | 1.47238900  | H | -0.57579400 | 2.85788600  | -3.30710200 |
| H              | 0.39603300  | -2.38893200 | -2.19394600 | H | 1.56216100  | 1.78120300  | -1.91254000 |
| H              | 2.01415100  | -3.76302900 | -3.46849800 | H | 0.47504300  | 2.96914300  | -1.17407800 |
| H              | 3.89242600  | -4.90567100 | -2.28209500 | P | -0.28430800 | -1.61618400 | 0.68994800  |
| H              | 4.11543300  | -4.67028700 | 0.19115300  | C | 0.43593400  | -1.87806900 | 2.39133600  |
| C              | 0.65225900  | 1.60444500  | 3.09096100  | C | 1.92950800  | -1.52454500 | 2.52759600  |
| H              | 0.83387400  | 2.68344300  | 2.98540100  | C | 2.33796500  | -0.04298600 | 2.40568500  |
| H              | -0.36086400 | 1.39009200  | 2.73063500  | P | 2.29138400  | 0.56279900  | 0.64383300  |
| H              | 0.69944100  | 1.36439700  | 4.16561500  | C | 3.09415600  | 2.20586800  | 0.69040700  |
| C              | 0.31628500  | -2.79005500 | 3.18165200  | C | 2.28917600  | 3.31554100  | 1.00516100  |
| H              | 1.19321600  | -3.43181300 | 3.01816100  | C | 2.84495800  | 4.59502900  | 1.06434600  |
| H              | 0.28891500  | -2.53458400 | 4.25320000  | C | 4.20549400  | 4.78158700  | 0.79561000  |
| H              | -0.58259100 | -3.37893900 | 2.95492700  | C | 5.00747600  | 3.68374200  | 0.46983400  |
| Co             | 0.12832700  | 0.18556200  | -0.71555700 | C | 4.45656900  | 2.39959200  | 0.41757200  |
|                |             |             |             | C | 3.39839200  | -0.54425800 | -0.29569300 |
| 7 <sub>T</sub> |             |             |             | C | 2.98306400  | -0.91592700 | -1.58524600 |
| C              | -3.69613000 | 1.25765400  | -0.77658500 | C | 4.60168000  | -1.05914900 | 0.21482000  |
| C              | -4.44080800 | 1.87183700  | 0.24457200  | C | 5.37642000  | -1.92567700 | -0.56068000 |
| C              | -5.68110900 | 1.36338000  | 0.63292800  | C | 4.96101600  | -2.28142500 | -1.84880300 |
| C              | -6.20075900 | 0.22481300  | 0.00866400  | C | 3.76332300  | -1.77466400 | -2.36169900 |
| C              | -5.45974900 | -0.40633300 | -0.99200000 | C | -2.04252000 | -2.04741000 | 0.95450400  |
| C              | -4.21570600 | 0.10233000  | -1.37948500 | C | -2.62500000 | -3.22461800 | 0.46421300  |
| H              | -4.04463700 | 2.76339600  | 0.73218300  | C | -3.95413600 | -3.52963100 | 0.77522300  |
| H              | -6.24538600 | 1.86050700  | 1.42611600  | C | -4.70209100 | -2.67187700 | 1.58567300  |
| H              | -7.17233200 | -0.17440900 | 0.30980400  | C | -4.12537400 | -1.49385600 | 2.07233600  |
| H              | -5.84656700 | -1.30605400 | -1.47646900 | C | -2.80695600 | -1.17425400 | 1.74893900  |
| H              | -3.65970500 | -0.41242900 | -2.16211000 | C | 0.36034900  | -2.83910600 | -0.50717400 |
| C              | -2.35740900 | 1.87939300  | -1.20488600 | C | 1.36624200  | -3.77681600 | -0.23238900 |
| C              | -1.32938100 | 1.58721200  | -0.09306200 | C | -0.13637400 | -2.73668100 | -1.82141700 |
| O              | -1.39283200 | 1.96201800  | 1.05274700  | C | 0.35026600  | -3.56683700 | -2.83117100 |
| H              | -2.91963100 | 5.97809200  | -1.88421500 | C | 1.35328200  | -4.50080100 | -2.54756400 |

|                  |             |             |             |   |             |             |             |
|------------------|-------------|-------------|-------------|---|-------------|-------------|-------------|
| C                | 1.85909600  | -4.60032900 | -1.24958400 | H | -8.09209500 | -0.96544900 | -0.36591900 |
| H                | -0.14298100 | -1.13655500 | 2.96598100  | H | -6.24439900 | -2.57292200 | 0.12879300  |
| H                | 2.53336100  | -2.13745500 | 1.84285900  | H | -3.90154300 | -1.82534800 | 0.12143700  |
| H                | 2.22316200  | -1.83807000 | 3.54348800  | C | -2.90820100 | 0.78278800  | -0.50288200 |
| H                | 3.39409400  | 0.02132800  | 2.71248400  | C | -1.87023700 | -0.32138500 | -0.09026900 |
| H                | 1.22361600  | 3.17661700  | 1.19931700  | O | -2.01868500 | -0.92626500 | 0.97504800  |
| H                | 2.21146000  | 5.44995500  | 1.31310400  | H | -2.72313500 | 3.76717500  | 2.41121700  |
| H                | 4.63881600  | 5.78401200  | 0.83505000  | C | -2.80501300 | 1.88848800  | 0.52571600  |
| H                | 6.06936600  | 3.82488600  | 0.25354100  | H | -2.86305500 | 1.51551300  | 1.55311200  |
| H                | 5.09195000  | 1.55106600  | 0.15938200  | H | -0.50517100 | 0.72498700  | -2.36448900 |
| H                | 2.03185000  | -0.54163800 | -1.97037700 | C | -2.60625800 | 1.17672200  | -1.97656600 |
| H                | 4.93711400  | -0.79016200 | 1.21837100  | H | -2.28717500 | 2.22145600  | -2.06735900 |
| H                | 6.30954600  | -2.32566900 | -0.15659100 | H | -3.50885000 | 1.06367800  | -2.59002300 |
| H                | 5.56956600  | -2.96100200 | -2.45044500 | C | -2.70821800 | 3.20572100  | 0.32155500  |
| H                | 3.42750200  | -2.05932800 | -3.36096300 | C | -2.64826600 | 4.22868200  | 1.41443100  |
| H                | -2.04164000 | -3.91161900 | -0.15089700 | H | -2.65994900 | 3.59538900  | -0.70005900 |
| H                | -4.40201000 | -4.44806600 | 0.38769900  | H | -1.70661000 | 4.80040300  | 1.36709300  |
| H                | -5.73936900 | -2.91373300 | 1.82918000  | H | -3.46491600 | 4.96546600  | 1.31362700  |
| H                | -4.71053000 | -0.81181600 | 2.69194900  | C | -1.51508700 | 0.23565700  | -2.49780100 |
| H                | -2.36913900 | -0.24398700 | 2.11702800  | C | -1.55486900 | -1.03717000 | -1.68042800 |
| H                | 1.78437900  | -3.87078300 | 0.76792300  | H | -1.54901900 | 0.07432000  | -3.58482400 |
| H                | -0.90988600 | -2.00019600 | -2.05617800 | H | -0.77640000 | -1.77553400 | -1.92835000 |
| H                | -0.04833100 | -3.47779000 | -3.84460000 | H | -2.50807800 | -1.57725900 | -1.70592500 |
| H                | 1.74320000  | -5.14417000 | -3.33992700 | P | 0.80094300  | -1.77484100 | 0.54316900  |
| H                | 2.64847900  | -5.32034200 | -1.02178400 | C | 0.99088200  | -1.49617400 | 2.36533300  |
| C                | 1.51589900  | 0.88418000  | 3.30582600  | C | 1.78850700  | -0.22320200 | 2.69830900  |
| H                | 1.97891200  | 1.87761600  | 3.38790300  | C | 1.19225900  | 1.13022100  | 2.27107900  |
| H                | 0.49087000  | 1.02327800  | 2.92905600  | P | 1.20118200  | 1.35418900  | 0.42738000  |
| H                | 1.45391900  | 0.45857100  | 4.32049600  | C | 0.81612300  | 3.12612100  | 0.12855300  |
| C                | 0.12222000  | -3.25680100 | 2.98167400  | C | 0.26705500  | 3.49016000  | -1.10837200 |
| H                | 0.70065800  | -4.05922300 | 2.50261000  | C | 0.06685300  | 4.83549600  | -1.42643700 |
| H                | 0.37748600  | -3.25808200 | 4.05359800  | C | 0.41177400  | 5.83051400  | -0.50715700 |
| H                | -0.94458700 | -3.50519000 | 2.88970200  | C | 0.96015900  | 5.47395200  | 0.72949200  |
| Co               | 0.17027400  | 0.42881300  | -0.35941200 | C | 1.16500900  | 4.12908300  | 1.04732600  |
|                  |             |             |             | C | 2.97795800  | 1.34296300  | -0.05199500 |
| TS7 <sub>s</sub> |             |             |             | C | 3.28011300  | 1.08443100  | -1.39765900 |
| C                | -4.35332500 | 0.22539500  | -0.41129800 | C | 4.01897700  | 1.65001300  | 0.83823300  |
| C                | -5.40574300 | 1.11881100  | -0.68196100 | C | 5.34147000  | 1.68331300  | 0.38753000  |
| C                | -6.73673700 | 0.70009300  | -0.66953000 | C | 5.63551700  | 1.42308700  | -0.95456800 |
| C                | -7.05127000 | -0.63237300 | -0.37864500 | C | 4.60093000  | 1.12835200  | -1.84773600 |
| C                | -6.01768100 | -1.52875300 | -0.10270600 | C | -0.09525300 | -3.37260800 | 0.38153100  |
| C                | -4.68229900 | -1.10521400 | -0.11601900 | C | 0.23163900  | -4.28307800 | -0.63713400 |
| H                | -5.17518000 | 2.16294900  | -0.90519200 | C | -0.49735700 | -5.46513100 | -0.79560600 |
| H                | -7.53206800 | 1.41836400  | -0.88568900 | C | -1.55864300 | -5.75836700 | 0.06408900  |

|                  |             |             |             |   |             |             |             |
|------------------|-------------|-------------|-------------|---|-------------|-------------|-------------|
| C                | -1.88285200 | -4.86331600 | 1.08862700  | O | -1.80669500 | 0.16007600  | 0.99067200  |
| C                | -1.16171600 | -3.67805300 | 1.24703200  | H | -4.08023300 | 4.47922700  | 2.29056900  |
| C                | 2.41273600  | -2.05369100 | -0.28115700 | P | 0.57239800  | -1.86575000 | 0.63806600  |
| C                | 3.63735200  | -2.23919700 | 0.37682300  | C | 1.20848100  | -1.54878400 | 2.36548900  |
| C                | 2.39563500  | -2.02271500 | -1.68901500 | C | 2.42195400  | -0.59697400 | 2.35379800  |
| C                | 3.56691800  | -2.21623400 | -2.42073100 | C | 2.17640300  | 0.90982900  | 2.12908200  |
| C                | 4.78171900  | -2.40645300 | -1.75607700 | P | 1.83124500  | 1.35989300  | 0.35771800  |
| C                | 4.81428000  | -2.40608700 | -0.35918300 | C | 1.71626800  | 3.18715600  | 0.39501000  |
| H                | -0.05835900 | -1.33002900 | 2.65285000  | C | 0.47368600  | 3.78621000  | 0.15058400  |
| H                | 2.81618600  | -0.32031300 | 2.31978100  | C | 0.33788600  | 5.17665100  | 0.20395600  |
| H                | 1.87565100  | -0.19088600 | 3.79712300  | C | 1.44758400  | 5.97447700  | 0.49707000  |
| H                | 1.86887800  | 1.90075200  | 2.66951800  | C | 2.69325700  | 5.38030600  | 0.73664000  |
| H                | -0.01007900 | 2.71518800  | -1.82348300 | C | 2.83025300  | 3.99152300  | 0.68562200  |
| H                | -0.36554400 | 5.10506600  | -2.39297500 | C | 3.36660700  | 1.06152700  | -0.59515000 |
| H                | 0.25260500  | 6.88338000  | -0.75236100 | C | 3.24606300  | 1.09098100  | -1.99634000 |
| H                | 1.23096000  | 6.24681100  | 1.45290600  | C | 4.61562100  | 0.78777000  | -0.02035000 |
| H                | 1.60505100  | 3.87217900  | 2.01238300  | C | 5.72428300  | 0.53778600  | -0.83652600 |
| H                | 2.47475300  | 0.84261500  | -2.09452800 | C | 5.59780500  | 0.56860700  | -2.22789200 |
| H                | 3.81243400  | 1.86910800  | 1.88683300  | C | 4.35573600  | 0.85262300  | -2.80803600 |
| H                | 6.14549200  | 1.91576200  | 1.09022000  | C | -0.88263000 | -2.95688200 | 0.83478400  |
| H                | 6.67069800  | 1.44793100  | -1.30356300 | C | -1.20959900 | -3.87518800 | -0.17902300 |
| H                | 4.82338200  | 0.91832900  | -2.89634000 | C | -2.40642900 | -4.59386500 | -0.12763100 |
| H                | 1.05966700  | -4.08145300 | -1.31582400 | C | -3.29592800 | -4.40534100 | 0.93508400  |
| H                | -0.22772900 | -6.15929900 | -1.59525400 | C | -2.97839500 | -3.49442200 | 1.94763400  |
| H                | -2.12841700 | -6.68255600 | -0.05995400 | C | -1.78351200 | -2.77186700 | 1.89756200  |
| H                | -2.70656500 | -5.08574900 | 1.77142200  | C | 1.84131100  | -2.90556100 | -0.17323600 |
| H                | -1.44074500 | -2.98866500 | 2.04018400  | C | 2.08856000  | -4.24644400 | 0.17150500  |
| H                | 3.69099400  | -2.24796100 | 1.46381200  | C | 2.60871700  | -2.30816100 | -1.18504500 |
| H                | 1.45793500  | -1.83729700 | -2.21728100 | C | 3.62408500  | -3.02288000 | -1.82709400 |
| H                | 3.53323300  | -2.19586700 | -3.51247800 | C | 3.87178100  | -4.35092300 | -1.47004700 |
| H                | 5.70424300  | -2.54121600 | -2.32571300 | C | 3.09858600  | -4.96210400 | -0.47505900 |
| H                | 5.76212700  | -2.53933600 | 0.16753000  | H | 0.36653700  | -1.04289200 | 2.86131700  |
| C                | -0.20283600 | 1.37501200  | 2.85082400  | H | 3.17854500  | -0.97220400 | 1.64627700  |
| H                | -0.56268600 | 2.38800700  | 2.62422800  | H | 2.88705100  | -0.67745500 | 3.35047900  |
| H                | -0.93861000 | 0.66025900  | 2.46086000  | H | 3.11416400  | 1.42764600  | 2.38776400  |
| H                | -0.16411300 | 1.26718800  | 3.94704000  | H | -0.38981100 | 3.15930400  | -0.07360700 |
| C                | 1.51612000  | -2.70164100 | 3.15318200  | H | -0.63606800 | 5.63441000  | 0.01536800  |
| H                | 2.59626200  | -2.84875100 | 3.01534600  | H | 1.34504600  | 7.06179800  | 0.53662900  |
| H                | 1.34102300  | -2.52988200 | 4.22721600  | H | 3.56220800  | 6.00345300  | 0.96250000  |
| H                | 1.00878900  | -3.63528700 | 2.87542200  | H | 3.80553000  | 3.53375100  | 0.86794700  |
| Co               | -0.04300000 | -0.12654500 | -0.65308900 | H | 2.27100300  | 1.28988900  | -2.45168000 |
|                  |             |             |             | H | 4.73694900  | 0.76335300  | 1.06333800  |
| TS7 <sub>T</sub> |             |             |             | H | 6.69186000  | 0.31768100  | -0.37890600 |
| C                | -1.79305900 | 0.48483500  | -0.17897800 | H | 6.46543600  | 0.36902600  | -2.86141600 |

|    |             |             |             |                |             |             |             |
|----|-------------|-------------|-------------|----------------|-------------|-------------|-------------|
| H  | 4.24971600  | 0.87745800  | -3.89526000 | C              | -3.12133300 | 4.28543500  | 1.77873200  |
| H  | -0.53055800 | -4.02575000 | -1.02032700 | H              | -3.35481500 | 2.08277300  | 1.74251700  |
| H  | -2.64523100 | -5.30262700 | -0.92447100 | H              | -2.93580300 | 5.10168300  | 1.06368300  |
| H  | -4.23312300 | -4.96587600 | 0.97399900  | H              | -2.33957200 | 4.32662100  | 2.55847100  |
| H  | -3.66781800 | -3.33854900 | 2.78105300  |                |             |             |             |
| H  | -1.56438400 | -2.05221400 | 2.68630500  | 8 <sub>s</sub> |             |             |             |
| H  | 1.48489500  | -4.73657400 | 0.93662300  | C              | -1.81719700 | -0.70978700 | -0.51969900 |
| H  | 2.40981600  | -1.27454100 | -1.46670200 | O              | -1.27320700 | -0.89620300 | 0.64137700  |
| H  | 4.21570800  | -2.53962900 | -2.60820600 | H              | -5.05637200 | 2.59196800  | 2.43875600  |
| H  | 4.66225600  | -4.91537500 | -1.97102500 | P              | 1.90515900  | -1.22784900 | 0.39605100  |
| H  | 3.28365100  | -6.00388400 | -0.20156000 | C              | 1.93969900  | -0.84739700 | 2.22292900  |
| C  | 1.06012700  | 1.47585000  | 3.01475300  | C              | 2.11693400  | 0.66008400  | 2.48279900  |
| H  | 1.06276000  | 2.57509200  | 3.00705900  | C              | 0.90294500  | 1.57585200  | 2.22696400  |
| H  | 0.06364300  | 1.14104800  | 2.68850500  | P              | 0.48023300  | 1.72816000  | 0.43319300  |
| H  | 1.20630400  | 1.14464700  | 4.05553200  | C              | -0.62147400 | 3.18205400  | 0.24229500  |
| C  | 1.53848300  | -2.82276300 | 3.14605900  | C              | -1.10580200 | 3.44170900  | -1.05174700 |
| H  | 2.44058200  | -3.31156800 | 2.74838500  | C              | -1.86019100 | 4.58546800  | -1.30791000 |
| H  | 1.73519100  | -2.56832000 | 4.20042900  | C              | -2.14110400 | 5.48491900  | -0.27181500 |
| H  | 0.71438900  | -3.55072300 | 3.12325600  | C              | -1.65637700 | 5.23541000  | 1.01389400  |
| Co | 0.06056600  | 0.15261800  | -0.54118200 | C              | -0.89519700 | 4.09017100  | 1.27329800  |
| C  | -4.21546200 | 0.72027300  | -0.84051200 | C              | 1.94354900  | 2.36505300  | -0.46623100 |
| C  | -5.27914100 | 1.39810800  | -1.46179200 | C              | 2.09529300  | 1.98129800  | -1.80915600 |
| C  | -6.56178500 | 0.84990300  | -1.49252200 | C              | 2.86778300  | 3.24698900  | 0.11159000  |
| C  | -6.81041700 | -0.39443100 | -0.90060800 | C              | 3.94529000  | 3.71986100  | -0.64310800 |
| C  | -5.76296600 | -1.07493800 | -0.27850700 | C              | 4.09447400  | 3.33282000  | -1.97935400 |
| C  | -4.47613400 | -0.52324300 | -0.24726600 | C              | 3.16372700  | 2.46795600  | -2.56440400 |
| H  | -5.10115800 | 2.37260800  | -1.92213900 | C              | 1.27222100  | -2.94332800 | 0.24779500  |
| H  | -7.37233300 | 1.39759100  | -1.98023900 | C              | 1.39787700  | -3.59087600 | -0.99543300 |
| H  | -7.81413900 | -0.82600900 | -0.92386700 | C              | 0.81494700  | -4.84007600 | -1.20891700 |
| H  | -5.93792300 | -2.04680300 | 0.19023200  | C              | 0.08236400  | -5.45719600 | -0.18751000 |
| H  | -3.68559400 | -1.07983700 | 0.25379300  | C              | -0.06070300 | -4.81453100 | 1.04433100  |
| C  | -2.82336800 | 1.38314700  | -0.87325500 | C              | 0.52829700  | -3.56413600 | 1.26232500  |
| C  | -2.31495000 | 1.50982200  | -2.31782700 | C              | 3.68070900  | -1.35476100 | -0.05974300 |
| H  | -1.37193400 | 2.08368100  | -2.29224900 | C              | 4.36765900  | -2.58145100 | -0.07498200 |
| H  | -3.02338100 | 2.07104700  | -2.94295600 | C              | 4.39109800  | -0.17699000 | -0.34685100 |
| C  | -2.85255100 | 2.74364300  | -0.18381200 | C              | 5.75502300  | -0.22338000 | -0.64768000 |
| H  | -1.43575600 | 0.16269800  | -3.76906200 | C              | 6.42718000  | -1.44852500 | -0.67274400 |
| H  | -2.61982800 | 3.59861000  | -0.82791900 | C              | 5.72929400  | -2.62608900 | -0.38423100 |
| C  | -2.05276600 | 0.10122200  | -2.85988100 | H              | 0.93753600  | -1.14032900 | 2.56767600  |
| C  | -1.36693500 | -0.75433100 | -1.79785900 | H              | 2.99902800  | 1.03713300  | 1.94214200  |
| H  | -3.01073100 | -0.36016000 | -3.14796700 | H              | 2.35481000  | 0.77305100  | 3.55373500  |
| H  | -0.42367800 | -1.20454600 | -2.16037900 | H              | 1.20525100  | 2.58527800  | 2.54791700  |
| H  | -1.98391700 | -1.57251200 | -1.41085200 | H              | -0.89354900 | 2.73956900  | -1.86157800 |
| C  | -3.12814700 | 2.94800300  | 1.10897400  | H              | -2.23431700 | 4.77408900  | -2.31695600 |

|    |             |             |             |                |             |             |             |
|----|-------------|-------------|-------------|----------------|-------------|-------------|-------------|
| H  | -2.73507800 | 6.38042900  | -0.46975300 | H              | -3.17475300 | 2.14732500  | -0.53084100 |
| H  | -1.86938500 | 5.93434300  | 1.82623000  | C              | -2.37283000 | -1.12259900 | -2.83924500 |
| H  | -0.51857700 | 3.92323100  | 2.28243800  | C              | -1.45505500 | -1.60134100 | -1.69935300 |
| H  | 1.38165700  | 1.28842600  | -2.26550500 | H              | -3.13266600 | -1.89407900 | -3.03345200 |
| H  | 2.75523700  | 3.56682900  | 1.14946300  | H              | -0.35974300 | -1.51668100 | -1.97002200 |
| H  | 4.66996700  | 4.39757200  | -0.18551300 | H              | -1.55021700 | -2.66991300 | -1.44702800 |
| H  | 4.93771000  | 3.70608800  | -2.56541900 | C              | -3.81560700 | 1.27613600  | 1.26851600  |
| H  | 3.27607900  | 2.16243500  | -3.60723000 | C              | -4.02463600 | 2.53679800  | 2.04805200  |
| H  | 1.95036900  | -3.10976800 | -1.80663100 | H              | -4.03704100 | 0.34038000  | 1.79601400  |
| H  | 0.92643600  | -5.33118500 | -2.17874500 | H              | -3.83352200 | 3.43275000  | 1.44001700  |
| H  | -0.37927400 | -6.43331500 | -0.35542700 | H              | -3.35980500 | 2.57436100  | 2.92924400  |
| H  | -0.63538600 | -5.28537600 | 1.84573900  |                |             |             |             |
| H  | 0.39552200  | -3.07950800 | 2.22963300  | 8 <sub>T</sub> |             |             |             |
| H  | 3.84297500  | -3.50865700 | 0.15845600  | C              | -2.01374700 | -0.64101600 | -0.43049900 |
| H  | 3.87815000  | 0.78131200  | -0.33056000 | O              | -1.57309600 | -0.80946200 | 0.71858100  |
| H  | 6.28924800  | 0.70397200  | -0.86818900 | H              | -4.13336700 | 4.15808600  | 1.59454300  |
| H  | 7.49208300  | -1.48699900 | -0.91524900 | P              | 1.26922700  | -1.74847700 | 0.40940100  |
| H  | 6.24840700  | -3.58779900 | -0.39470800 | C              | 1.42913900  | -1.30502400 | 2.21706700  |
| C  | -0.33935100 | 1.15440900  | 3.02467500  | C              | 2.10283100  | 0.06906300  | 2.40730700  |
| H  | -1.13041500 | 1.91473600  | 2.97522500  | C              | 1.28353500  | 1.35255200  | 2.14080800  |
| H  | -0.76768900 | 0.21659400  | 2.64830500  | P              | 1.06796000  | 1.72770600  | 0.33221100  |
| H  | -0.06375700 | 1.02208800  | 4.08311300  | C              | 0.37823100  | 3.43493000  | 0.25969900  |
| C  | 2.98768400  | -1.66250900 | 2.98083800  | C              | -0.23367100 | 3.83732800  | -0.93886000 |
| H  | 4.00669100  | -1.33493000 | 2.72376200  | C              | -0.73320900 | 5.13351900  | -1.08315300 |
| H  | 2.85219400  | -1.52568900 | 4.06608900  | C              | -0.63091800 | 6.04329100  | -0.02604100 |
| H  | 2.91304900  | -2.73801700 | 2.76252000  | C              | -0.01388300 | 5.65390500  | 1.16691800  |
| Co | 0.05524900  | -0.18834600 | -0.53586000 | C              | 0.49442800  | 4.35933800  | 1.30859900  |
| C  | -4.27999400 | -1.08095700 | -0.46946300 | C              | 2.75154500  | 2.06803600  | -0.33037800 |
| C  | -4.05639200 | -2.22671700 | 0.30728400  | C              | 2.90249400  | 2.06094100  | -1.72771000 |
| C  | -5.10125300 | -3.11343200 | 0.59713600  | C              | 3.86260400  | 2.35841600  | 0.47424600  |
| C  | -6.38832000 | -2.86948900 | 0.11558600  | C              | 5.10700100  | 2.61602100  | -0.11006100 |
| C  | -6.62480500 | -1.72627500 | -0.65759100 | C              | 5.25031900  | 2.60351700  | -1.50046400 |
| C  | -5.58179400 | -0.84450300 | -0.94436300 | C              | 4.14166200  | 2.33323000  | -2.31031500 |
| H  | -3.06185700 | -2.43548300 | 0.70297500  | C              | 0.40482800  | -3.36317400 | 0.37318000  |
| H  | -4.90114500 | -3.99914200 | 1.20586000  | C              | 0.60280800  | -4.21653700 | -0.72651000 |
| H  | -7.20369500 | -3.56127200 | 0.34151800  | C              | -0.15727000 | -5.37935700 | -0.87131400 |
| H  | -7.62880600 | -1.51918100 | -1.03731000 | C              | -1.13180700 | -5.70483000 | 0.07828600  |
| H  | -5.78533900 | 0.05059800  | -1.53634400 | C              | -1.33821400 | -4.85944400 | 1.17269400  |
| C  | -3.17148200 | -0.05459000 | -0.78435200 | C              | -0.57872600 | -3.69507700 | 1.31974400  |
| C  | -3.04546000 | 0.16087700  | -2.31260600 | C              | 2.96579100  | -2.14082100 | -0.16088000 |
| H  | -2.38979300 | 1.03062200  | -2.47821400 | C              | 3.68416000  | -3.27427500 | 0.26142000  |
| H  | -4.00625600 | 0.36876600  | -2.80231900 | C              | 3.56786500  | -1.25127000 | -1.06267400 |
| C  | -3.39895000 | 1.21866900  | -0.00203100 | C              | 4.87467800  | -1.46256400 | -1.51198400 |
| H  | -1.83135500 | -0.94991000 | -3.78002300 | C              | 5.58820400  | -2.58064500 | -1.07268500 |

|    |             |             |             |                |             |             |             |
|----|-------------|-------------|-------------|----------------|-------------|-------------|-------------|
| C  | 4.98725100  | -3.48920600 | -0.19230000 | H              | -5.50987700 | 1.21591200  | -1.75536600 |
| H  | 0.38348700  | -1.24011600 | 2.55148100  | C              | -3.09874000 | 0.38361100  | -0.81143300 |
| H  | 3.04848800  | 0.09212700  | 1.84258100  | C              | -2.84553700 | 0.48073800  | -2.33900800 |
| H  | 2.39500200  | 0.12396700  | 3.46925700  | H              | -1.94892100 | 1.10409300  | -2.50069600 |
| H  | 1.87815700  | 2.17887300  | 2.56042700  | H              | -3.67574400 | 0.94244800  | -2.88828300 |
| H  | -0.32014800 | 3.12864200  | -1.76632700 | C              | -2.87806200 | 1.68247900  | -0.08068800 |
| H  | -1.21029700 | 5.43024000  | -2.02038100 | H              | -2.05445500 | -1.02451700 | -3.74379800 |
| H  | -1.02968100 | 7.05511500  | -0.13224100 | H              | -1.99246100 | 2.23086500  | -0.40549400 |
| H  | 0.07470700  | 6.36199900  | 1.99459000  | C              | -2.55680500 | -0.96503500 | -2.76828100 |
| H  | 0.98280100  | 4.08058200  | 2.24358600  | C              | -1.70135000 | -1.52751800 | -1.62749800 |
| H  | 2.04404500  | 1.82706500  | -2.36343200 | H              | -3.49744400 | -1.53184600 | -2.83856600 |
| H  | 3.77089900  | 2.38631900  | 1.56100900  | H              | -0.60747300 | -1.50002400 | -1.89052600 |
| H  | 5.96827200  | 2.83052000  | 0.52751700  | H              | -1.86049900 | -2.58632300 | -1.37443300 |
| H  | 6.22425800  | 2.80440900  | -1.95339900 | C              | -3.60089800 | 2.17485800  | 0.93212400  |
| H  | 4.24524700  | 2.32243700  | -3.39804500 | C              | -3.28703700 | 3.45063800  | 1.65184400  |
| H  | 1.35180600  | -3.96776600 | -1.48189900 | H              | -4.48390200 | 1.62526000  | 1.27802500  |
| H  | 0.01126700  | -6.03225400 | -1.73144300 | H              | -2.39400200 | 3.94452800  | 1.24358900  |
| H  | -1.72831100 | -6.61338900 | -0.03502300 | H              | -3.11655100 | 3.26256600  | 2.72675900  |
| H  | -2.09770500 | -5.10473400 | 1.91935900  |                |             |             |             |
| H  | -0.76747200 | -3.04337100 | 2.17255800  | 9 <sub>s</sub> |             |             |             |
| H  | 3.22273300  | -3.99851400 | 0.93418600  | C              | 3.95178900  | -2.07118100 | 0.96432600  |
| H  | 3.00711500  | -0.38537200 | -1.41137900 | C              | 4.27299500  | -1.72130800 | 2.28912200  |
| H  | 5.32917600  | -0.75325100 | -2.20781700 | C              | 5.57792200  | -1.83075800 | 2.77019100  |
| H  | 6.60959800  | -2.75216800 | -1.42171100 | C              | 6.59969600  | -2.29788200 | 1.93513200  |
| H  | 5.53777200  | -4.37224500 | 0.14182700  | C              | 6.29684200  | -2.65098900 | 0.61905200  |
| C  | -0.08402400 | 1.34112000  | 2.83643900  | C              | 4.98672700  | -2.53672000 | 0.13848200  |
| H  | -0.55664700 | 2.33287100  | 2.81555800  | H              | 3.48999500  | -1.35283000 | 2.95420500  |
| H  | -0.77818100 | 0.63384800  | 2.36301400  | H              | 5.79926900  | -1.54911100 | 3.80297900  |
| H  | 0.04110200  | 1.05201900  | 3.89283900  | H              | 7.62253100  | -2.38604500 | 2.31000100  |
| C  | 2.14733000  | -2.36367000 | 3.05616100  | H              | 7.08249100  | -3.02104000 | -0.04488300 |
| H  | 3.22503800  | -2.38454500 | 2.83482100  | H              | 4.78599600  | -2.82248100 | -0.89407200 |
| H  | 2.03210900  | -2.12633700 | 4.12646200  | C              | 2.52104100  | -1.91945300 | 0.48185700  |
| H  | 1.74359100  | -3.37257000 | 2.88969000  | C              | 1.99641800  | -0.45339900 | 0.61500900  |
| Co | 0.06255300  | -0.08559700 | -0.70456900 | O              | 2.63148600  | 0.44904900  | 1.09418100  |
| C  | -4.47694300 | -0.22861300 | -0.51663300 | H              | -0.19699600 | 0.07843200  | 1.61839100  |
| C  | -4.65223700 | -1.32402000 | 0.34106900  | C              | 1.49855600  | -2.72999700 | 1.33155000  |
| C  | -5.92951700 | -1.83657900 | 0.59852600  | H              | 1.83783600  | -2.77230600 | 2.37779100  |
| C  | -7.05407200 | -1.25715200 | 0.00856600  | H              | 1.46841900  | -3.76293400 | 0.95532100  |
| C  | -6.89218600 | -0.15630600 | -0.84064900 | C              | 2.32392700  | -2.28699100 | -1.00090800 |
| C  | -5.61751100 | 0.34965300  | -1.09962900 | H              | 2.54965200  | -3.35208700 | -1.15464500 |
| H  | -3.79229200 | -1.78837800 | 0.82472700  | H              | 3.03401000  | -1.70486300 | -1.61049400 |
| H  | -6.03979500 | -2.69418200 | 1.26710700  | C              | 0.12042300  | -2.09118200 | 1.26120300  |
| H  | -8.05117700 | -1.65699600 | 0.20911200  | C              | -0.21126200 | -0.98904600 | 2.17278700  |
| H  | -7.76428600 | 0.31216800  | -1.30412000 | H              | -0.68986900 | -2.78284700 | 1.02747500  |

|   |             |             |             |                |             |             |             |
|---|-------------|-------------|-------------|----------------|-------------|-------------|-------------|
| H | -1.23637000 | -0.98889500 | 2.56358400  | H              | 1.81958500  | 4.20304100  | -0.61365100 |
| H | 0.52587000  | -0.77965500 | 2.96119600  | H              | 1.13053400  | 2.03898500  | 1.93164200  |
| C | 0.93645900  | -1.99467900 | -1.48856500 | H              | -1.39933300 | 4.16819500  | -0.85316000 |
| C | 0.16864800  | -2.81191200 | -2.21530400 | H              | -1.92584400 | 5.82430800  | 0.88952000  |
| H | 0.61689600  | -0.90289700 | -1.50922400 | H              | -0.94018400 | 5.61439200  | 3.17178500  |
| H | -0.79931200 | -2.49278000 | -2.59783100 | H              | 0.60694200  | 3.72031900  | 3.68122700  |
| H | 0.50160800  | -3.82506400 | -2.46288000 | H              | -2.90964600 | -2.53350200 | 1.66442500  |
| P | -2.22709800 | -0.57294500 | -0.38224900 | H              | -3.66027100 | -4.88490700 | 1.59276100  |
| C | -2.77235500 | 0.25845600  | -1.96220200 | H              | -4.09930600 | -5.99936000 | -0.60001700 |
| C | -2.28280800 | 1.71599600  | -2.01514900 | H              | -3.77465400 | -4.71965600 | -2.71945600 |
| C | -0.78764000 | 1.97159900  | -2.27458400 | H              | -3.01916700 | -2.37777800 | -2.65739400 |
| P | 0.29472300  | 1.64771300  | -0.78795600 | H              | -5.04657800 | -1.06368100 | 0.49054300  |
| C | 1.95220200  | 2.18413400  | -1.39388800 | H              | -1.82975500 | 1.62866700  | 1.51272900  |
| C | 2.75483700  | 1.28733800  | -2.11753600 | H              | -3.29561500 | 2.77701100  | 3.12848300  |
| C | 4.00289000  | 1.68018700  | -2.60343900 | H              | -5.65558500 | 2.01003200  | 3.44462600  |
| C | 4.46984500  | 2.97813500  | -2.37073500 | H              | -6.51312700 | 0.08172700  | 2.11121300  |
| C | 3.67578500  | 3.87932000  | -1.65672400 | C              | -0.28030000 | 1.22273700  | -3.51173200 |
| C | 2.42398900  | 3.48680400  | -1.17173000 | H              | 0.69667300  | 1.59967800  | -3.84180500 |
| C | -0.11683000 | 2.96473500  | 0.42544500  | H              | -0.18492800 | 0.13993500  | -3.34178800 |
| C | 0.45081800  | 2.86306300  | 1.70863100  | H              | -0.99245900 | 1.36828000  | -4.33999300 |
| C | -0.96143800 | 4.04667700  | 0.13728500  | C              | -4.28665300 | 0.22349500  | -2.18801900 |
| C | -1.25771000 | 4.99227700  | 1.12456800  | H              | -4.80428500 | 0.89960200  | -1.49137800 |
| C | -0.70370200 | 4.87610000  | 2.40173800  | H              | -4.50789300 | 0.56518100  | -3.21204100 |
| C | 0.16012300  | 3.81279800  | 2.68834400  | H              | -4.71547400 | -0.78026300 | -2.06748400 |
| C | -2.89305600 | -2.28088000 | -0.49106300 | Co             | 0.12784600  | -0.47252600 | 0.10801000  |
| C | -3.08419400 | -3.00960700 | 0.69754600  |                |             |             |             |
| C | -3.51484000 | -4.33715900 | 0.65848300  | 9 <sub>T</sub> |             |             |             |
| C | -3.76142800 | -4.96071700 | -0.56901200 | C              | -3.63400500 | -1.53174600 | 1.01434200  |
| C | -3.57849800 | -4.24480800 | -1.75503600 | C              | -4.66948400 | -1.99386600 | 0.18708700  |
| C | -3.14777200 | -2.91534700 | -1.71734700 | C              | -5.97779700 | -1.52899000 | 0.34772400  |
| C | -3.32408600 | 0.19934500  | 0.88181500  | C              | -6.27641800 | -0.58884500 | 1.33703000  |
| C | -4.65325900 | -0.22424300 | 1.06422700  | C              | -5.25299500 | -0.12115000 | 2.16660000  |
| C | -2.85259800 | 1.28282400  | 1.63819800  | C              | -3.94705100 | -0.59252600 | 2.01096000  |
| C | -3.68545000 | 1.93471900  | 2.55236100  | H              | -4.46090500 | -2.72913800 | -0.59087700 |
| C | -5.00316600 | 1.50584600  | 2.72737100  | H              | -6.76633600 | -1.90310800 | -0.31016500 |
| C | -5.48335900 | 0.42370700  | 1.98119200  | H              | -7.29830200 | -0.22138400 | 1.45922500  |
| H | -2.27606300 | -0.31913400 | -2.75697400 | H              | -5.46983000 | 0.61689800  | 2.94314200  |
| H | -2.61834200 | 2.24100900  | -1.10750900 | H              | -3.16104200 | -0.22331700 | 2.67004500  |
| H | -2.82145300 | 2.19690200  | -2.84866700 | C              | -2.23010800 | -2.12256600 | 0.88364400  |
| H | -0.67349400 | 3.04925800  | -2.47117100 | C              | -1.11541700 | -1.08950400 | 1.13674100  |
| H | 2.40795500  | 0.27367900  | -2.31108200 | O              | -0.92359600 | -0.49213400 | 2.16669900  |
| H | 4.61384300  | 0.96659200  | -3.16168000 | H              | 1.13648200  | -2.51605600 | -2.31051900 |
| H | 5.44998100  | 3.28486900  | -2.74413300 | C              | -1.88522900 | -2.64397000 | -0.51555100 |
| H | 4.03067200  | 4.89612000  | -1.47075400 | H              | -2.40375800 | -2.03056600 | -1.26687200 |



|   |             |             |             |                  |             |             |             |
|---|-------------|-------------|-------------|------------------|-------------|-------------|-------------|
| H | -2.22861600 | -3.68386900 | -0.65316000 | H                | 1.91147000  | 2.76632100  | -1.16325300 |
| C | -2.10167000 | -3.22009600 | 2.00037300  | H                | 2.23391600  | 2.78372600  | -2.88681100 |
| H | -2.91566800 | -3.94122900 | 1.83053100  | H                | 3.85209400  | 1.38939700  | -1.91114600 |
| H | -2.30127400 | -2.71781500 | 2.96136300  | H                | 2.41478500  | -2.93609300 | -0.20508200 |
| C | -0.38678900 | -2.52492400 | -0.74242500 | H                | 4.09803100  | -4.77008100 | -0.30715800 |
| C | 0.04221800  | -2.50187100 | -2.19827700 | H                | 6.50366400  | -4.23061300 | -0.68572600 |
| H | 0.17791300  | -3.27813700 | -0.17310000 | H                | 7.22111500  | -1.85733200 | -0.95158100 |
| H | -0.35088700 | -3.39334800 | -2.72527000 | H                | 5.54290900  | -0.02743500 | -0.84071100 |
| H | -0.35123200 | -1.62162800 | -2.73363900 | H                | 2.49042200  | -0.49966300 | 2.37836300  |
| C | -0.79026200 | -3.94243800 | 2.08661000  | H                | 4.00691300  | 2.64227400  | -0.18320500 |
| C | -0.63404100 | -5.25384400 | 1.87943400  | H                | 4.67067800  | 3.93860000  | 1.80624400  |
| H | 0.08601900  | -3.33901100 | 2.35416600  | H                | 4.26156500  | 3.03659800  | 4.09550900  |
| H | 0.34405100  | -5.73565900 | 1.97435300  | H                | 3.18566000  | 0.80000500  | 4.37237600  |
| H | -1.48189600 | -5.89357400 | 1.60975700  | H                | -3.21244500 | 2.01195200  | 0.25256800  |
| P | -0.57236700 | 1.24481300  | -0.89960800 | H                | -5.52615300 | 1.70492500  | -0.55003700 |
| C | 0.37590400  | 1.85265400  | -2.40068800 | H                | -5.96597700 | 0.57495600  | -2.73006600 |
| C | 1.85475000  | 2.14562100  | -2.07149200 | H                | -4.04811300 | -0.25584500 | -4.09915300 |
| C | 2.83964200  | 0.96077000  | -1.98039900 | H                | -1.72833300 | 0.06741900  | -3.31250200 |
| P | 2.60264600  | -0.04819900 | -0.44129700 | H                | -1.83201800 | 3.98321700  | -0.87629700 |
| C | 3.86707000  | -1.36903700 | -0.53088500 | H                | 0.67189900  | 1.55958900  | 1.67188700  |
| C | 3.46778100  | -2.70386700 | -0.37576500 | H                | 0.85596700  | 3.43446400  | 3.28265700  |
| C | 4.41530300  | -3.73174300 | -0.43048600 | H                | -0.30935100 | 5.59607700  | 2.81631900  |
| C | 5.76281600  | -3.42839500 | -0.64153800 | H                | -1.65492100 | 5.85309800  | 0.73187700  |
| C | 6.16645900  | -2.09515100 | -0.79211700 | C                | 2.79337100  | 0.05686300  | -3.21604400 |
| C | 5.22409500  | -1.06736800 | -0.73328900 | H                | 3.62468000  | -0.66216600 | -3.21989800 |
| C | 3.19624900  | 0.97871100  | 0.95676800  | H                | 1.85642200  | -0.51521300 | -3.27474900 |
| C | 2.97659900  | 0.47136500  | 2.25009300  | H                | 2.87227500  | 0.67183300  | -4.12699900 |
| C | 3.81652300  | 2.22696500  | 0.80689200  | C                | -0.25779400 | 3.06930200  | -3.08089800 |
| C | 4.19570500  | 2.96293200  | 1.93479300  | H                | -0.11090200 | 3.98188700  | -2.48436200 |
| C | 3.96882900  | 2.45656300  | 3.21697100  | H                | 0.22579400  | 3.23141800  | -4.05795800 |
| C | 3.36403200  | 1.20348300  | 3.37271700  | H                | -1.33525700 | 2.93962700  | -3.25555500 |
| C | -2.30013000 | 1.08845200  | -1.48494900 | Co               | 0.36748700  | -0.79127500 | -0.08164200 |
| C | -3.38448800 | 1.52826800  | -0.70922600 |                  |             |             |             |
| C | -4.69414600 | 1.35310600  | -1.16283000 | TS8 <sub>s</sub> |             |             |             |
| C | -4.94002200 | 0.71669000  | -2.38205300 | C                | -3.99563400 | -2.03485100 | -0.90851900 |
| C | -3.86645500 | 0.25153800  | -3.14848800 | C                | -4.28039800 | -1.72839400 | -2.25198900 |
| C | -2.55557900 | 0.43524700  | -2.70345300 | C                | -5.57842100 | -1.82465800 | -2.75506200 |
| C | -0.56638200 | 2.64538400  | 0.27614500  | C                | -6.62689000 | -2.23729800 | -1.92447800 |
| C | -1.23023900 | 3.86035500  | 0.02441600  | C                | -6.35903800 | -2.54906900 | -0.59004700 |
| C | 0.17449300  | 2.50350300  | 1.45945100  | C                | -5.05663700 | -2.44593700 | -0.08707200 |
| C | 0.27123100  | 3.56075700  | 2.36870100  | H                | -3.47431400 | -1.40430000 | -2.91262500 |
| C | -0.38138600 | 4.76797100  | 2.10674000  | H                | -5.77338600 | -1.57573600 | -3.80153700 |
| C | -1.13571200 | 4.91341100  | 0.93603200  | H                | -7.64399000 | -2.31547800 | -2.31685800 |
| H | 0.32413200  | 1.00219700  | -3.09669200 | H                | -7.16677900 | -2.87668200 | 0.06970900  |

|   |             |             |             |                 |             |             |             |
|---|-------------|-------------|-------------|-----------------|-------------|-------------|-------------|
| H | -4.87747800 | -2.69690600 | 0.95878800  | C               | 3.31945900  | 0.29912000  | -0.94802600 |
| C | -2.57516800 | -1.90988600 | -0.39587700 | C               | 4.68617700  | 0.00445600  | -1.11057100 |
| C | -1.94871500 | -0.51066800 | -0.60923700 | C               | 2.72250100  | 1.22483400  | -1.81490900 |
| O | -2.51037200 | 0.41109700  | -1.14375700 | C               | 3.46861400  | 1.85535300  | -2.81496200 |
| H | 0.30561200  | -0.22299000 | -1.65252100 | C               | 4.82545700  | 1.56069500  | -2.96546300 |
| C | -1.60106000 | -2.86679900 | -1.14946000 | C               | 5.43062500  | 0.63114400  | -2.11161700 |
| H | -1.88203100 | -2.90467900 | -2.21192500 | H               | 2.47543100  | -0.13466200 | 2.76091500  |
| H | -1.71314100 | -3.88574600 | -0.75072200 | H               | 2.48857800  | 2.39805700  | 1.04033400  |
| C | -2.43483800 | -2.01674400 | 1.14184100  | H               | 2.75468400  | 2.42209400  | 2.77473500  |
| H | -2.66079300 | -3.04176600 | 1.48131900  | H               | 0.50901700  | 3.01785100  | 2.45108200  |
| H | -3.16389800 | -1.34293600 | 1.60952700  | H               | -2.25316100 | 0.33008800  | 2.75539300  |
| C | -0.14671700 | -2.39182400 | -1.03428200 | H               | -4.49072400 | 0.98011500  | 3.54814200  |
| C | 0.27562400  | -1.30742600 | -2.01905900 | H               | -5.58626400 | 3.04679000  | 2.66574100  |
| H | 0.57906100  | -3.20672800 | -1.07818300 | H               | -4.38768600 | 4.45074500  | 0.98388400  |
| H | 1.28928100  | -1.47240500 | -2.40218700 | H               | -2.14805700 | 3.80191800  | 0.18723600  |
| H | -0.43655800 | -1.22810500 | -2.85324800 | H               | -0.97903800 | 1.73427000  | -2.00349600 |
| C | -1.01365200 | -1.63711400 | 1.51870700  | H               | 1.05300500  | 4.18099400  | 0.91931100  |
| C | -0.03821800 | -2.53317300 | 0.99798900  | H               | 1.55926700  | 5.83835300  | -0.81633200 |
| H | -0.83536800 | -1.17882400 | 2.49242600  | H               | 0.81151500  | 5.47620600  | -3.17086500 |
| H | 0.96597700  | -2.51620900 | 1.41076000  | H               | -0.47847800 | 3.41525200  | -3.74925900 |
| H | -0.35680400 | -3.55550600 | 0.78824300  | H               | 3.11730600  | -2.46038600 | -1.56891300 |
| P | 2.32778000  | -0.45864700 | 0.40607500  | H               | 3.97909500  | -4.76989100 | -1.40062200 |
| C | 2.87703600  | 0.46535600  | 1.93071800  | H               | 4.47577200  | -5.76724700 | 0.83501500  |
| C | 2.24412500  | 1.86463100  | 1.97168000  | H               | 4.09119100  | -4.41812500 | 2.90011400  |
| C | 0.73913600  | 1.95482400  | 2.28177400  | H               | 3.21326000  | -2.12166100 | 2.74312600  |
| P | -0.35222900 | 1.50092000  | 0.82902800  | H               | 5.17318000  | -0.72040500 | -0.45825900 |
| C | -2.02625600 | 2.01654800  | 1.41440200  | H               | 1.66784700  | 1.46327500  | -1.71279300 |
| C | -2.70870000 | 1.23529500  | 2.36192900  | H               | 2.98024100  | 2.57472700  | -3.47653200 |
| C | -3.97816300 | 1.60413100  | 2.81195100  | H               | 5.41157300  | 2.04885200  | -3.74809000 |
| C | -4.59035600 | 2.76031900  | 2.31892400  | H               | 6.49094000  | 0.39186500  | -2.22463800 |
| C | -3.91931800 | 3.54533600  | 1.37791900  | C               | 0.37884800  | 1.20797100  | 3.56777000  |
| C | -2.64740000 | 3.17786200  | 0.92821400  | H               | -0.62767200 | 1.46354300  | 3.92202900  |
| C | 0.02830500  | 2.80718100  | -0.42099500 | H               | 0.43431300  | 0.11721800  | 3.45068300  |
| C | -0.40747300 | 2.62382200  | -1.74502900 | H               | 1.09122600  | 1.49470700  | 4.35828100  |
| C | 0.72374200  | 3.98373100  | -0.09981700 | C               | 4.39455100  | 0.57191400  | 2.09161500  |
| C | 1.00685400  | 4.93463900  | -1.08501400 | H               | 4.82548400  | 1.25910900  | 1.34841700  |
| C | 0.58599700  | 4.73351900  | -2.40173000 | H               | 4.62427000  | 0.97405600  | 3.09168200  |
| C | -0.13263600 | 3.57855200  | -2.72565900 | H               | 4.90106700  | -0.39813700 | 1.99424500  |
| C | 3.11082600  | -2.11346400 | 0.57189300  | Co              | -0.12495000 | -0.58592300 | 0.03368100  |
| C | 3.32488600  | -2.88400100 | -0.58498000 |                 |             |             |             |
| C | 3.81429400  | -4.18806200 | -0.49044800 | 10 <sub>s</sub> |             |             |             |
| C | 4.09278100  | -4.74655100 | 0.76150400  | C               | -3.71673500 | -1.84989200 | -0.69578400 |
| C | 3.87746200  | -3.99136400 | 1.91715900  | C               | -4.29681100 | -1.67792600 | -1.96644800 |
| C | 3.38685100  | -2.68520400 | 1.82541400  | C               | -5.67772500 | -1.52659200 | -2.11283900 |

|   |             |             |             |   |             |             |             |
|---|-------------|-------------|-------------|---|-------------|-------------|-------------|
| C | -6.51585900 | -1.56013000 | -0.99322600 | C | -0.36413400 | 3.81042100  | -2.28988100 |
| C | -5.95480900 | -1.74757700 | 0.27216800  | C | 3.43741300  | -1.68781600 | 0.53730000  |
| C | -4.57139400 | -1.88825700 | 0.41789300  | C | 3.95294300  | -2.21587800 | -0.65990900 |
| H | -3.65756100 | -1.64075000 | -2.84759200 | C | 4.58103300  | -3.46256000 | -0.67225200 |
| H | -6.10200100 | -1.38316000 | -3.11027000 | C | 4.70085600  | -4.20196700 | 0.50935000  |
| H | -7.59644100 | -1.44243700 | -1.10781600 | C | 4.19219500  | -3.68345400 | 1.70337700  |
| H | -6.59479700 | -1.77508900 | 1.15792200  | C | 3.56241600  | -2.43550700 | 1.71937000  |
| H | -4.16242200 | -2.01554800 | 1.41999600  | C | 3.37471600  | 0.91021100  | -0.71223300 |
| C | -2.21151900 | -1.98059600 | -0.54247500 | C | 4.77601400  | 1.01363500  | -0.75732400 |
| C | -1.42483700 | -0.80778700 | -1.18187200 | C | 2.60343500  | 1.63716000  | -1.62899700 |
| O | -1.72237000 | -0.29510400 | -2.24123700 | C | 3.21003700  | 2.48073900  | -2.56315000 |
| H | 0.71193800  | -1.51321100 | -1.94381900 | C | 4.60281700  | 2.58979200  | -2.59446300 |
| C | -1.68445000 | -3.25038200 | -1.28624400 | C | 5.38295100  | 1.85103000  | -1.69520100 |
| H | -2.01841100 | -3.22991200 | -2.33450200 | H | 2.40634800  | -0.17017000 | 2.84646100  |
| H | -2.17308200 | -4.11308800 | -0.80578800 | H | 1.85534500  | 2.55374600  | 1.56894200  |
| C | -1.70739100 | -2.03443700 | 0.90508600  | H | 1.97998300  | 2.29549500  | 3.30080500  |
| H | -2.03011900 | -2.97303700 | 1.38959600  | H | -0.30365900 | 2.36242300  | 2.87455400  |
| H | -2.13009700 | -1.21031500 | 1.49387400  | H | -2.39320900 | 1.45736700  | 3.33466500  |
| C | -0.15551700 | -3.44502000 | -1.22538500 | H | -4.80427300 | 1.76486100  | 3.60615000  |
| C | 0.63817100  | -2.59295000 | -2.21569600 | H | -6.30529100 | 1.86811400  | 1.61217000  |
| H | 0.03693400  | -4.49340200 | -1.50720000 | H | -5.32177700 | 1.66076800  | -0.67716800 |
| H | 1.67826900  | -2.94150600 | -2.28196500 | H | -2.91166600 | 1.33469700  | -0.96521100 |
| H | 0.19335700  | -2.59059600 | -3.22230100 | H | -0.74461700 | 1.70815900  | -2.01229400 |
| C | -0.19434200 | -1.94925200 | 0.83879300  | H | -0.00321900 | 4.02127100  | 1.57422100  |
| C | 0.37152700  | -3.22047500 | 0.19778800  | H | 0.28703700  | 6.04405000  | 0.20355800  |
| H | 0.26606900  | -1.78608700 | 1.82059200  | H | 0.05934800  | 5.93284900  | -2.27896600 |
| H | 1.46820400  | -3.22371300 | 0.19145400  | H | -0.47545500 | 3.75278100  | -3.37521600 |
| H | 0.06374100  | -4.06478600 | 0.84407000  | H | 3.85804800  | -1.65466100 | -1.59121900 |
| P | 2.46173600  | -0.14038700 | 0.47324400  | H | 4.97537700  | -3.85929200 | -1.61098100 |
| C | 2.67474600  | 0.63771400  | 2.15255000  | H | 5.18977500  | -5.17907700 | 0.49873500  |
| C | 1.69509400  | 1.80259300  | 2.35644400  | H | 4.28183100  | -4.25333400 | 2.63140800  |
| C | 0.19559600  | 1.45695400  | 2.49551900  | H | 3.15874400  | -2.05985700 | 2.66052800  |
| P | -0.63889500 | 1.17107600  | 0.85740400  | H | 5.39325500  | 0.43204800  | -0.07136700 |
| C | -2.45654400 | 1.33567500  | 1.16042000  | H | 1.51865700  | 1.54406000  | -1.59485800 |
| C | -3.01405000 | 1.47560200  | 2.44180900  | H | 2.59284000  | 3.04722600  | -3.26455400 |
| C | -4.39126600 | 1.66176400  | 2.59981000  | H | 5.08526000  | 3.24481300  | -3.32422300 |
| C | -5.22958000 | 1.72534400  | 1.48510100  | H | 6.47261100  | 1.92805600  | -1.72644300 |
| C | -4.68031000 | 1.61048400  | 0.20518700  | C | -0.03293800 | 0.33312600  | 3.51394500  |
| C | -3.30913900 | 1.41657700  | 0.04384000  | H | -1.08682400 | 0.05096800  | 3.61903500  |
| C | -0.37077100 | 2.70927600  | -0.12203000 | H | 0.51784900  | -0.57719700 | 3.25387400  |
| C | -0.51361100 | 2.65459300  | -1.51995300 | H | 0.32756200  | 0.66960500  | 4.49894600  |
| C | -0.09386500 | 3.94142200  | 0.49067200  | C | 4.10893000  | 1.06857700  | 2.45774200  |
| C | 0.06406600  | 5.09263800  | -0.28536500 | H | 4.41014600  | 1.93084400  | 1.84435300  |
| C | -0.06630900 | 5.03029100  | -1.67608100 | H | 4.18221200  | 1.36771500  | 3.51602000  |

|                 |             |             |             |   |             |             |             |
|-----------------|-------------|-------------|-------------|---|-------------|-------------|-------------|
| H               | 4.82844000  | 0.25458000  | 2.28688000  | C | -4.69261500 | 1.59392200  | 0.25582800  |
| Co              | 0.24095600  | -0.45699000 | -0.33588900 | C | -3.32153500 | 1.40370500  | 0.07264700  |
|                 |             |             |             | C | -0.25969100 | 3.00970800  | -0.29902800 |
| 10 <sub>T</sub> |             |             |             | C | -0.47094300 | 2.88191400  | -1.68269100 |
| C               | -3.71779200 | -2.04804300 | -0.55768800 | C | 0.15830800  | 4.24228500  | 0.22453700  |
| C               | -4.36418900 | -1.85965900 | -1.79323700 | C | 0.38344300  | 5.32521600  | -0.63082800 |
| C               | -5.74568000 | -1.66382700 | -1.86047400 | C | 0.17886000  | 5.19152600  | -2.00760900 |
| C               | -6.51679100 | -1.66210000 | -0.69313100 | C | -0.25700900 | 3.96974300  | -2.53143400 |
| C               | -5.88885300 | -1.85676800 | 0.53944000  | C | 3.37069500  | -1.72377500 | 0.69872800  |
| C               | -4.50475700 | -2.04483500 | 0.60556200  | C | 3.93749500  | -2.29319700 | -0.45503300 |
| H               | -3.77590400 | -1.84894600 | -2.71061500 | C | 4.52577800  | -3.55855600 | -0.40253300 |
| H               | -6.22284300 | -1.51255200 | -2.83241100 | C | 4.54999800  | -4.27441600 | 0.79911200  |
| H               | -7.59788400 | -1.51051200 | -0.74524000 | C | 3.98402400  | -3.71593100 | 1.94898800  |
| H               | -6.47706400 | -1.85820100 | 1.46079100  | C | 3.39510800  | -2.44917500 | 1.90136100  |
| H               | -4.04109600 | -2.18520700 | 1.58203300  | C | 3.32598900  | 0.81198200  | -0.70489200 |
| C               | -2.21114300 | -2.23330500 | -0.49714300 | C | 4.72105600  | 0.98979100  | -0.71374800 |
| C               | -1.43976200 | -1.06153400 | -1.14909700 | C | 2.55396900  | 1.39979700  | -1.71858300 |
| O               | -1.73669100 | -0.52379100 | -2.18959600 | C | 3.15301200  | 2.18488800  | -2.70727700 |
| H               | 0.74891300  | -2.04616300 | -2.22660900 | C | 4.53720500  | 2.37488200  | -2.69715800 |
| C               | -1.77652000 | -3.51199600 | -1.28344100 | C | 5.31941400  | 1.76966900  | -1.70520900 |
| H               | -2.17381100 | -3.46505900 | -2.30844800 | H | 2.28089900  | -0.02773500 | 2.91932700  |
| H               | -2.28633600 | -4.35067000 | -0.78224900 | H | 2.02158300  | 2.64690900  | 1.44549200  |
| C               | -1.61031000 | -2.29558800 | 0.90997900  | H | 2.07020100  | 2.49427400  | 3.19280500  |
| H               | -1.95046900 | -3.20426700 | 1.43958200  | H | -0.15765700 | 2.73304200  | 2.77956800  |
| H               | -1.93928800 | -1.42891300 | 1.50412000  | H | -2.21517400 | 2.65356400  | 3.05436500  |
| C               | -0.25958800 | -3.80491500 | -1.32519400 | H | -4.63273500 | 2.95499100  | 3.38063000  |
| C               | 0.51139500  | -3.09868900 | -2.44990700 | H | -6.24562600 | 2.28030900  | 1.59846700  |
| H               | -0.17854500 | -4.88340900 | -1.54062400 | H | -5.38561400 | 1.29787200  | -0.53452200 |
| H               | 1.47660000  | -3.60380600 | -2.61540900 | H | -2.96769300 | 0.97768400  | -0.86400600 |
| H               | -0.04735900 | -3.11519300 | -3.39920900 | H | -0.79731300 | 1.92429500  | -2.09658700 |
| C               | -0.09779800 | -2.29910000 | 0.74695400  | H | 0.30828400  | 4.37088600  | 1.29784300  |
| C               | 0.39264100  | -3.55789700 | 0.04767400  | H | 0.71707800  | 6.27965700  | -0.21626700 |
| H               | 0.43376200  | -2.14762500 | 1.69915400  | H | 0.35717800  | 6.04033400  | -2.67223000 |
| H               | 1.48736500  | -3.55310500 | -0.05406000 | H | -0.42251200 | 3.85954900  | -3.60585600 |
| H               | 0.15297900  | -4.40920700 | 0.71531000  | H | 3.91238300  | -1.75082900 | -1.40222500 |
| P               | 2.43428400  | -0.16192800 | 0.55906400  | H | 4.96396200  | -3.98836800 | -1.30664500 |
| C               | 2.64547000  | 0.70904900  | 2.18869000  | H | 5.00833100  | -5.26550000 | 0.83861100  |
| C               | 1.76539800  | 1.96782700  | 2.27332000  | H | 3.99788200  | -4.26894300 | 2.89133900  |
| C               | 0.23396400  | 1.78576300  | 2.37931600  | H | 2.94885300  | -2.03474200 | 2.80686800  |
| P               | -0.60628700 | 1.54023400  | 0.74041600  | H | 5.34142000  | 0.50875900  | 0.04337500  |
| C               | -2.40687600 | 1.76379100  | 1.07690900  | H | 1.47573600  | 1.23759500  | -1.73056500 |
| C               | -2.89491700 | 2.33557100  | 2.26377500  | H | 2.53593400  | 2.64469300  | -3.48264600 |
| C               | -4.26912100 | 2.51571600  | 2.44838400  | H | 5.01169500  | 2.98753800  | -3.46774800 |
| C               | -5.17205500 | 2.14192200  | 1.44882600  | H | 6.40359300  | 1.90637200  | -1.70525300 |

|                  |             |             |             |   |             |             |             |
|------------------|-------------|-------------|-------------|---|-------------|-------------|-------------|
| C                | -0.16122600 | 0.65059200  | 3.33258400  | C | -2.10817500 | 1.74036200  | -2.32564200 |
| H                | -1.24018200 | 0.64071700  | 3.53652800  | C | -0.58122900 | 1.89024500  | -2.45905400 |
| H                | 0.10759100  | -0.33497800 | 2.92591200  | P | 0.35100200  | 1.57071100  | -0.87747900 |
| H                | 0.36115800  | 0.77507000  | 4.29456600  | C | 2.08200900  | 1.91036600  | -1.38937400 |
| C                | 4.09789500  | 1.04472300  | 2.53079400  | C | 2.88439300  | 0.84479700  | -1.82748400 |
| H                | 4.48174300  | 1.85574600  | 1.89451600  | C | 4.19578100  | 1.07147800  | -2.24545400 |
| H                | 4.15656900  | 1.38542900  | 3.57727200  | C | 4.71921900  | 2.36972600  | -2.23068700 |
| H                | 4.76138700  | 0.17464700  | 2.42110900  | C | 3.92303700  | 3.43600100  | -1.80275300 |
| Co               | 0.20347800  | -0.54164200 | -0.22014900 | C | 2.60768400  | 3.20918900  | -1.38340100 |
|                  |             |             |             | C | -0.07521200 | 2.95179900  | 0.25298400  |
| TS9 <sub>s</sub> |             |             |             | C | 0.37923300  | 2.87533400  | 1.58185900  |
| C                | 3.80600100  | -2.03351800 | 0.80332600  | C | -0.85390700 | 4.05110200  | -0.13970000 |
| C                | 4.73772100  | -1.27480700 | 1.53792300  | C | -1.19368000 | 5.04142700  | 0.78836500  |
| C                | 6.10118300  | -1.32242300 | 1.24111800  | C | -0.75321100 | 4.95049300  | 2.11083000  |
| C                | 6.57263200  | -2.13374200 | 0.20352900  | C | 0.04328100  | 3.86833900  | 2.50241500  |
| C                | 5.66196400  | -2.89737900 | -0.53023300 | C | -2.93131200 | -2.22136400 | -0.89367000 |
| C                | 4.29564500  | -2.84678400 | -0.23321100 | C | -3.54655100 | -2.90536900 | 0.16802600  |
| H                | 4.39090100  | -0.62155100 | 2.33725000  | C | -3.94699000 | -4.23591300 | 0.01676200  |
| H                | 6.80094800  | -0.71882800 | 1.82523600  | C | -3.73647600 | -4.90232400 | -1.19363900 |
| H                | 7.64002000  | -2.17121000 | -0.02837500 | C | -3.11555900 | -4.23194500 | -2.25284500 |
| H                | 6.01248900  | -3.54053200 | -1.34177100 | C | -2.71050500 | -2.90388300 | -2.10365600 |
| H                | 3.61251900  | -3.45340800 | -0.82765400 | C | -3.33249200 | 0.26686500  | 0.56676600  |
| C                | 2.32208300  | -1.91989900 | 1.09567800  | C | -4.72665400 | 0.07563400  | 0.58891700  |
| C                | 1.80429400  | -0.47330000 | 0.79638300  | C | -2.75288600 | 1.12785500  | 1.51211500  |
| O                | 2.41886100  | 0.48890300  | 1.19712100  | C | -3.54328900 | 1.79567600  | 2.45150400  |
| H                | 0.70305500  | 0.30206700  | 3.33017200  | C | -4.92667800 | 1.60174400  | 2.46370400  |
| C                | 1.98426200  | -2.13078000 | 2.59681400  | C | -5.51479200 | 0.73808200  | 1.53228200  |
| H                | 2.62993800  | -1.49587200 | 3.21696200  | H | -2.13694500 | -0.29378800 | -3.04082300 |
| H                | 2.22839100  | -3.17617700 | 2.84000500  | H | -2.48735100 | 2.30089100  | -1.45696400 |
| C                | 1.43269000  | -2.86368100 | 0.28354200  | H | -2.54467000 | 2.23205700  | -3.21116300 |
| H                | 1.62894100  | -3.92113400 | 0.53905600  | H | -0.37301400 | 2.94462500  | -2.69938800 |
| H                | 1.63312600  | -2.76768700 | -0.79815700 | H | 2.48728300  | -0.17322400 | -1.82449000 |
| C                | 0.49642700  | -1.83636800 | 2.93787200  | H | 4.81427000  | 0.23087200  | -2.56939400 |
| C                | 0.30575000  | -0.60060800 | 3.81795700  | H | 5.74961600  | 2.54822800  | -2.54805500 |
| H                | 0.10780300  | -2.70215300 | 3.50009600  | H | 4.32763500  | 4.45112000  | -1.78774600 |
| H                | -0.76171900 | -0.42810700 | 4.03043800  | H | 1.99635400  | 4.04734300  | -1.04234700 |
| H                | 0.82917200  | -0.72282500 | 4.77876800  | H | 1.00833000  | 2.03744800  | 1.88113000  |
| C                | -0.00038200 | -2.49408200 | 0.52279700  | H | -1.20528900 | 4.15357600  | -1.16599000 |
| C                | -0.39307100 | -1.81287200 | 1.69833000  | H | -1.80726000 | 5.88794300  | 0.47074000  |
| H                | -0.75365000 | -3.00326300 | -0.07887300 | H | -1.02533000 | 5.72297900  | 2.83420300  |
| H                | -0.40290600 | -0.34953000 | 1.41010700  | H | 0.40228800  | 3.79396700  | 3.53187200  |
| H                | -1.46366400 | -1.82067700 | 1.93422200  | H | -3.71391600 | -2.40151700 | 1.12098500  |
| P                | -2.24786000 | -0.53391400 | -0.67992500 | H | -4.42692500 | -4.75238700 | 0.85164300  |
| C                | -2.66678600 | 0.31086600  | -2.29052900 | H | -4.05245600 | -5.94165300 | -1.31149800 |

|                 |             |             |             |   |             |             |             |
|-----------------|-------------|-------------|-------------|---|-------------|-------------|-------------|
| H               | -2.94294600 | -4.74542900 | -3.20192400 | C | -0.08001500 | -2.69335800 | -0.26006000 |
| H               | -2.21336800 | -2.40357000 | -2.93705000 | C | 0.37875500  | -2.37652100 | -1.50622800 |
| H               | -5.20180000 | -0.59998200 | -0.12247800 | H | 0.62973700  | -2.97143900 | 0.52206700  |
| H               | -1.67618200 | 1.28208800  | 1.51390500  | H | 0.40417800  | 0.11228200  | -1.25965800 |
| H               | -3.07065800 | 2.46506000  | 3.17421100  | H | 1.45638300  | -2.33921500 | -1.68395600 |
| H               | -5.54789000 | 2.11806800  | 3.19980000  | P | 2.27814000  | -0.46169000 | 0.63427400  |
| H               | -6.59569500 | 0.57767700  | 1.53999400  | C | 2.59889000  | 0.32383200  | 2.29930800  |
| C               | -0.00842100 | 1.02749100  | -3.59019500 | C | 1.96810300  | 1.72108700  | 2.37450300  |
| H               | 1.01549000  | 1.32804600  | -3.84889200 | C | 0.43128400  | 1.79339000  | 2.43176700  |
| H               | 0.01034100  | -0.04323300 | -3.33003900 | P | -0.40824000 | 1.51840000  | 0.79314000  |
| H               | -0.63182000 | 1.14181800  | -4.49149600 | C | -2.17273200 | 1.80269700  | 1.21597100  |
| C               | -4.15637500 | 0.30580800  | -2.63406500 | C | -2.97127200 | 0.71437600  | 1.60104800  |
| H               | -4.72239300 | 0.98581400  | -1.98029300 | C | -4.30690300 | 0.90768300  | 1.95435900  |
| H               | -4.29040900 | 0.65385100  | -3.67118500 | C | -4.85812600 | 2.19358500  | 1.92814800  |
| H               | -4.59797600 | -0.69790600 | -2.55531900 | C | -4.06615600 | 3.28237900  | 1.55229800  |
| Co              | 0.03834600  | -0.52744100 | 0.01916400  | C | -2.72700400 | 3.08996000  | 1.19665100  |
|                 |             |             |             | C | 0.03786100  | 2.94041100  | -0.27135400 |
|                 |             |             |             | C | -0.34002700 | 2.89430300  | -1.62529200 |
| 11 <sub>s</sub> |             |             |             | C | 0.74020200  | 4.05664300  | 0.20728000  |
| C               | -3.82815500 | -1.92415200 | -0.69837100 | C | 1.08429500  | 5.09711600  | -0.66200200 |
| C               | -4.68564400 | -1.22585300 | -1.56996200 | C | 0.72247500  | 5.03812400  | -2.00984400 |
| C               | -6.05600500 | -1.13786100 | -1.31739300 | C | 0.00059200  | 3.93784600  | -2.48656100 |
| C               | -6.61008400 | -1.75531200 | -0.19111800 | C | 3.00254900  | -2.14005200 | 0.80243700  |
| C               | -5.77432300 | -2.46080200 | 0.67751000  | C | 3.61801400  | -2.77332600 | -0.29096600 |
| C               | -4.40021600 | -2.54113300 | 0.42720400  | C | 4.05796000  | -4.09601900 | -0.19174700 |
| H               | -4.27150000 | -0.72515900 | -2.44364600 | C | 3.88912800  | -4.80713100 | 0.99943700  |
| H               | -6.69625500 | -0.58223000 | -2.00775400 | C | 3.27366300  | -4.18759500 | 2.09177800  |
| H               | -7.68312300 | -1.68848100 | 0.00529100  | C | 2.82897300  | -2.86703700 | 1.99447600  |
| H               | -6.18958800 | -2.95261900 | 1.56106300  | C | 3.41362400  | 0.41158600  | -0.51628000 |
| H               | -3.77729900 | -3.09156700 | 1.13204700  | C | 4.80781000  | 0.22285500  | -0.46386100 |
| C               | -2.33279400 | -1.96046300 | -0.95837900 | C | 2.89136000  | 1.32737200  | -1.44253200 |
| C               | -1.71592400 | -0.51332200 | -0.90850200 | C | 3.73760000  | 2.05213500  | -2.28697800 |
| O               | -2.26848200 | 0.39196800  | -1.49382400 | C | 5.11980400  | 1.86259700  | -2.22294900 |
| H               | -0.46137500 | -0.24290100 | -3.30226700 | C | 5.65146800  | 0.94246200  | -1.31197200 |
| C               | -1.99690300 | -2.47611600 | -2.38388000 | H | 2.06929900  | -0.33926600 | 2.99797600  |
| H               | -2.58797500 | -1.92866600 | -3.12964100 | H | 2.36363100  | 2.34384600  | 1.55744500  |
| H               | -2.31419700 | -3.52946700 | -2.42952600 | H | 2.33210000  | 2.18572500  | 3.30616400  |
| C               | -1.54541500 | -2.80603600 | 0.04782000  | H | 0.15985800  | 2.82522400  | 2.70598500  |
| H               | -1.86812400 | -3.86145400 | 0.02565000  | H | -2.55450600 | -0.29481200 | 1.61076300  |
| H               | -1.71542700 | -2.45225600 | 1.07875600  | H | -4.92099200 | 0.04912000  | 2.23459800  |
| C               | -0.49097100 | -2.36140300 | -2.73519300 | H | -5.90679100 | 2.34497300  | 2.19571600  |
| C               | -0.15436000 | -1.21916600 | -3.70164900 | H | -4.49208500 | 4.28847400  | 1.52799900  |
| H               | -0.20327300 | -3.29531900 | -3.25334000 | H | -2.11924800 | 3.94585900  | 0.89654300  |
| H               | 0.92956000  | -1.17881500 | -3.89616000 | H | -0.91538700 | 2.04217900  | -1.98920900 |
| H               | -0.66774700 | -1.37039100 | -4.66391700 |   |             |             |             |

|                   |             |             |             |   |             |             |             |
|-------------------|-------------|-------------|-------------|---|-------------|-------------|-------------|
| H                 | 1.02652300  | 4.13413800  | 1.25566700  | H | 1.89647800  | -3.84782200 | -0.18510100 |
| H                 | 1.63826200  | 5.95718600  | -0.27833300 | H | 1.91759500  | -2.41351800 | -1.22144600 |
| H                 | 0.99676800  | 5.85055600  | -2.68715800 | C | 0.28794500  | -2.53530600 | 2.44645500  |
| H                 | -0.29724700 | 3.89013300  | -3.53683800 | C | -0.18572600 | -1.50612300 | 3.48021000  |
| H                 | 3.76051000  | -2.23328600 | -1.22846300 | H | -0.00335300 | -3.52547100 | 2.84316600  |
| H                 | 4.53613300  | -4.57047100 | -1.05217100 | H | -1.28344100 | -1.51206600 | 3.57124500  |
| H                 | 4.23494300  | -5.84071800 | 1.07681400  | H | 0.24223300  | -1.73217200 | 4.46914900  |
| H                 | 3.13600800  | -4.73481100 | 3.02755200  | C | 0.12995700  | -2.62152200 | -0.08234700 |
| H                 | 2.33849500  | -2.41085700 | 2.85639000  | C | -0.46064500 | -2.44672400 | 1.14166300  |
| H                 | 5.24059100  | -0.49527200 | 0.23258600  | H | -0.49266700 | -2.82019000 | -0.95908900 |
| H                 | 1.81702200  | 1.48112400  | -1.50854100 | H | 0.57750500  | -0.21326700 | 1.28736100  |
| H                 | 3.30824000  | 2.76273500  | -2.99721200 | H | -1.54855800 | -2.46686500 | 1.22460100  |
| H                 | 5.78377200  | 2.42517400  | -2.88402400 | P | -2.29318600 | -0.40371700 | -0.63297700 |
| H                 | 6.73132900  | 0.78302700  | -1.26050000 | C | -2.82710800 | 0.58880700  | -2.12025700 |
| C                 | -0.15937500 | 0.85171200  | 3.48743300  | C | -2.19139500 | 1.98375600  | -2.11132900 |
| H                 | -1.20738100 | 1.09502000  | 3.70649000  | C | -0.67042900 | 2.04862000  | -2.33518300 |
| H                 | -0.11636700 | -0.20371200 | 3.17465500  | P | 0.33053300  | 1.61255900  | -0.82516100 |
| H                 | 0.41171800  | 0.94663600  | 4.42474500  | C | 2.03804600  | 1.88927700  | -1.44542200 |
| C                 | 4.07126200  | 0.37262000  | 2.70501900  | C | 2.74929800  | 0.81228500  | -1.99801900 |
| H                 | 4.62915700  | 1.10654900  | 2.10491000  | C | 4.02659400  | 1.00594700  | -2.52438100 |
| H                 | 4.14705800  | 0.67924100  | 3.76100600  | C | 4.60784500  | 2.27906400  | -2.50111400 |
| H                 | 4.56416300  | -0.60460900 | 2.60174600  | C | 3.90311800  | 3.35523300  | -1.95418900 |
| Co                | 0.00371100  | -0.49564700 | -0.05322800 | C | 2.62086200  | 3.16318200  | -1.42864000 |
|                   |             |             |             | C | 0.04601600  | 2.96703800  | 0.37918400  |
|                   |             |             |             | C | 0.57032400  | 2.81618500  | 1.67592300  |
| TS10 <sub>s</sub> |             |             |             | C | -0.68889800 | 4.12200300  | 0.07158900  |
| C                 | 3.83819600  | -2.05112600 | 0.79367800  | C | -0.91353400 | 5.09707600  | 1.04917600  |
| C                 | 4.62827100  | -1.49502400 | 1.81644100  | C | -0.40065800 | 4.93449700  | 2.33804800  |
| C                 | 6.02187500  | -1.50910900 | 1.74227900  | C | 0.35013200  | 3.79434900  | 2.64612300  |
| C                 | 6.66476500  | -2.08038500 | 0.63863100  | C | -3.06390000 | -2.03886300 | -0.95368800 |
| C                 | 5.89507900  | -2.63512800 | -0.38547900 | C | -3.75520300 | -2.75299100 | 0.03795800  |
| C                 | 4.49757200  | -2.61924600 | -0.30770100 | C | -4.25692400 | -4.03078000 | -0.22721800 |
| H                 | 4.15003300  | -1.03313600 | 2.68027800  | C | -4.07334800 | -4.61311300 | -1.48371600 |
| H                 | 6.60992700  | -1.06801300 | 2.55138700  | C | -3.37740700 | -3.91332600 | -2.47522600 |
| H                 | 7.75604000  | -2.09209500 | 0.57931700  | C | -2.87088600 | -2.63924200 | -2.21161900 |
| H                 | 6.38004500  | -3.08720100 | -1.25461000 | C | -3.19821400 | 0.31443800  | 0.79158300  |
| H                 | 3.92850400  | -3.05843600 | -1.12672900 | C | -4.59902800 | 0.26723500  | 0.91485100  |
| C                 | 2.31874700  | -1.99770500 | 0.88544000  | C | -2.44990900 | 0.96987700  | 1.78249000  |
| C                 | 1.83632200  | -0.52171900 | 0.77750600  | C | -3.08277500 | 1.58889300  | 2.86295800  |
| O                 | 2.58043000  | 0.41091100  | 1.00414300  | C | -4.47491500 | 1.54609200  | 2.97296900  |
| H                 | 0.12127300  | -0.48399800 | 3.20818800  | C | -5.22940800 | 0.87928300  | 2.00053500  |
| C                 | 1.82476100  | -2.55458700 | 2.25248400  | H | -2.41365300 | 0.01570000  | -2.96324400 |
| H                 | 2.29976700  | -2.00115500 | 3.07350900  | H | -2.47823100 | 2.50843900  | -1.18657700 |
| H                 | 2.19414300  | -3.58941200 | 2.31145700  | H | -2.65455300 | 2.55281000  | -2.93484700 |
| C                 | 1.61269200  | -2.78130100 | -0.23057200 |   |             |             |             |

|                 |             |             |             |   |             |             |             |
|-----------------|-------------|-------------|-------------|---|-------------|-------------|-------------|
| H               | -0.40949300 | 3.09794600  | -2.54442700 | C | -2.39562000 | -0.10031400 | -0.93430000 |
| H               | 2.30719700  | -0.18634500 | -2.00435500 | O | -3.09892600 | 0.84515000  | -1.14764300 |
| H               | 4.57432900  | 0.15837000  | -2.94353900 | H | -0.59494800 | -0.03270800 | -2.96236600 |
| H               | 5.61185700  | 2.43005300  | -2.90547100 | C | -2.23492800 | -2.25412500 | -2.13266000 |
| H               | 4.35307700  | 4.35092700  | -1.93168600 | H | -2.77319300 | -1.86571000 | -3.00794100 |
| H               | 2.08007700  | 4.00903600  | -0.99922900 | H | -2.51993000 | -3.31156200 | -2.02372000 |
| H               | 1.16700200  | 1.93580600  | 1.91580400  | C | -2.00194600 | -2.20171200 | 0.35245000  |
| H               | -1.09242000 | 4.27952500  | -0.92813700 | H | -2.35213000 | -3.24600900 | 0.43347000  |
| H               | -1.49255200 | 5.98856500  | 0.79626700  | H | -2.27561500 | -1.71708200 | 1.29959200  |
| H               | -0.58058000 | 5.69629400  | 3.10050600  | C | -0.71309400 | -2.15756000 | -2.37496700 |
| H               | 0.76451300  | 3.66383900  | 3.64877200  | C | -0.30863800 | -1.02879500 | -3.33482600 |
| H               | -3.90682100 | -2.31618500 | 1.02581500  | H | -0.43725300 | -3.09579200 | -2.88804800 |
| H               | -4.79458300 | -4.57075500 | 0.55596600  | H | 0.78290500  | -1.02092800 | -3.48357900 |
| H               | -4.46799200 | -5.61087900 | -1.69022500 | H | -0.78556800 | -1.16445200 | -4.31890300 |
| H               | -3.22376000 | -4.36243400 | -3.45944500 | C | -0.50192900 | -2.22033100 | 0.18796500  |
| H               | -2.31702800 | -2.11520700 | -2.99409800 | C | 0.09156200  | -2.15844000 | -1.08294200 |
| H               | -5.20219200 | -0.25640400 | 0.17365600  | H | 0.03340300  | -2.68553600 | 1.02092800  |
| H               | -1.36428600 | 0.99333800  | 1.70009700  | H | -1.26895800 | 0.11250300  | -0.90801000 |
| H               | -2.48222300 | 2.10105600  | 3.61845700  | H | 1.10551000  | -2.54343000 | -1.20567600 |
| H               | -4.97423500 | 2.02640000  | 3.81813600  | P | 2.27904000  | -0.68717500 | 0.55433700  |
| H               | -6.31779900 | 0.83497400  | 2.08713300  | C | 2.84512900  | 0.06805500  | 2.16551400  |
| C               | -0.21913600 | 1.20332900  | -3.53173300 | C | 2.55537500  | 1.57609300  | 2.22395900  |
| H               | 0.79792700  | 1.46593200  | -3.85071600 | C | 1.09331000  | 1.99445700  | 2.45006300  |
| H               | -0.23282200 | 0.12498500  | -3.30635000 | P | 0.04334900  | 1.66142700  | 0.95360200  |
| H               | -0.89610100 | 1.37774100  | -4.38327500 | C | -1.66065300 | 2.06876000  | 1.49893000  |
| C               | -4.34108700 | 0.68474100  | -2.30874700 | C | -2.42870300 | 1.05737500  | 2.09680900  |
| H               | -4.79853600 | 1.34905400  | -1.56109600 | C | -3.73636500 | 1.31081800  | 2.51211400  |
| H               | -4.55389200 | 1.10862100  | -3.30357100 | C | -4.29123000 | 2.58221700  | 2.33211100  |
| H               | -4.83274400 | -0.29708500 | -2.24899900 | C | -3.52848100 | 3.59746500  | 1.74611200  |
| Co              | -0.03503500 | -0.46802000 | -0.02980100 | C | -2.21744400 | 3.34480100  | 1.33146000  |
|                 |             |             |             | C | 0.43652600  | 2.97205400  | -0.26945500 |
|                 |             |             |             | C | -0.28483400 | 2.96122300  | -1.47965100 |
| 12 <sub>s</sub> |             |             |             | C | 1.45727900  | 3.91759000  | -0.09749700 |
| C               | -4.28000100 | -1.69633100 | -0.71370100 | C | 1.76449500  | 4.82137700  | -1.12083200 |
| C               | -5.09978600 | -1.30210300 | -1.78584100 | C | 1.05224700  | 4.79702000  | -2.32168500 |
| C               | -6.49026200 | -1.39025700 | -1.70115500 | C | 0.01826500  | 3.86886700  | -2.49443100 |
| C               | -7.09582100 | -1.87331000 | -0.53636500 | C | 2.80667200  | -2.43734000 | 0.71201400  |
| C               | -6.29440700 | -2.26188500 | 0.53870100  | C | 3.44043600  | -3.11972900 | -0.33874700 |
| C               | -4.90039400 | -2.17286800 | 0.45102000  | C | 3.76475000  | -4.47331000 | -0.20989300 |
| H               | -4.64989300 | -0.91222300 | -2.70005800 | C | 3.45575500  | -5.16261300 | 0.96589300  |
| H               | -7.10390800 | -1.07745000 | -2.54987000 | C | 2.81436500  | -4.49317700 | 2.01312500  |
| H               | -8.18431100 | -1.94375900 | -0.46828100 | C | 2.48762700  | -3.14124600 | 1.88688200  |
| H               | -6.75187100 | -2.63925000 | 1.45682900  | C | 3.33234800  | 0.04052200  | -0.75678700 |
| H               | -4.30513300 | -2.47910000 | 1.31051800  | C | 4.72590200  | -0.14246100 | -0.81010100 |
| C               | -2.76223200 | -1.56452500 | -0.83032700 |   |             |             |             |



|                 |             |             |             |   |             |             |             |
|-----------------|-------------|-------------|-------------|---|-------------|-------------|-------------|
| C               | 2.71047900  | 0.83023800  | -1.73817000 | C | -5.37108000 | -1.80025400 | 0.55903000  |
| C               | 3.46493900  | 1.44590700  | -2.74009400 | H | -4.63822100 | -1.97639000 | -2.75949200 |
| C               | 4.85074100  | 1.27056400  | -2.77725000 | H | -7.09115000 | -2.08713000 | -2.90470200 |
| C               | 5.47754900  | 0.47108800  | -1.81446600 | H | -8.48579300 | -2.00837900 | -0.83158600 |
| H               | 2.22116400  | -0.44719200 | 2.91135000  | H | -7.36124200 | -1.81258900 | 1.39220000  |
| H               | 2.97077500  | 2.05940100  | 1.32608500  | H | -4.91436400 | -1.70648300 | 1.54398900  |
| H               | 3.12960200  | 1.98082600  | 3.07374800  | C | -3.04586100 | -1.74893600 | -0.51867700 |
| H               | 1.07220000  | 3.08686600  | 2.59036300  | C | -2.65128900 | -0.33623700 | -0.95442600 |
| H               | -1.99990500 | 0.06292900  | 2.22926200  | O | -3.16907300 | 0.29924300  | -1.84110500 |
| H               | -4.32617300 | 0.51154700  | 2.96730500  | H | -0.34055400 | -0.70709700 | -2.05750100 |
| H               | -5.31882100 | 2.78121200  | 2.64621200  | C | -2.36054600 | -2.76285000 | -1.48607600 |
| H               | -3.95697400 | 4.59298500  | 1.60578600  | H | -2.70248300 | -2.59222200 | -2.51531700 |
| H               | -1.63410700 | 4.14260100  | 0.86826300  | H | -2.72541700 | -3.75759100 | -1.18513800 |
| H               | -1.10547700 | 2.25564600  | -1.62436300 | C | -2.51222300 | -2.01178200 | 0.90565400  |
| H               | 2.02758400  | 3.96450200  | 0.83005000  | H | -3.01239400 | -2.91273300 | 1.30060500  |
| H               | 2.56679200  | 5.54829500  | -0.97281800 | H | -2.80423300 | -1.19604100 | 1.58190900  |
| H               | 1.29666600  | 5.50157400  | -3.12026000 | C | -0.81973900 | -2.77256900 | -1.46919400 |
| H               | -0.55426600 | 3.85022200  | -3.42489700 | C | -0.17225400 | -1.73894300 | -2.40460300 |
| H               | 3.68190400  | -2.59798400 | -1.26579100 | H | -0.51701000 | -3.76421600 | -1.84810800 |
| H               | 4.26077700  | -4.98946000 | -1.03543900 | H | 0.91682800  | -1.88815700 | -2.44817600 |
| H               | 3.71092900  | -6.22042400 | 1.06554100  | H | -0.57330100 | -1.82411200 | -3.42711800 |
| H               | 2.56426600  | -5.02553900 | 2.93400000  | C | -1.02618800 | -2.25799600 | 0.99413300  |
| H               | 1.97910300  | -2.63787300 | 2.71186800  | C | -0.26751400 | -2.66437000 | -0.06653400 |
| H               | 5.22718300  | -0.77591800 | -0.07824500 | H | -0.61491500 | -2.34483100 | 2.00809900  |
| H               | 1.63015000  | 0.97418000  | -1.71998600 | H | -1.78149200 | 0.10243000  | -0.40323400 |
| H               | 2.96431500  | 2.06215400  | -3.49040600 | H | 0.73809700  | -3.05513200 | 0.10069400  |
| H               | 5.44366400  | 1.75070100  | -3.55963800 | P | 2.47964400  | -0.59415900 | 0.49327000  |
| H               | 6.55949300  | 0.32146800  | -1.84631800 | C | 3.27782500  | 0.51363500  | 1.77934400  |
| C               | 0.48782300  | 1.34423800  | 3.69833700  | C | 2.84659700  | 1.98280200  | 1.61076100  |
| H               | -0.45271900 | 1.83087100  | 3.98896300  | C | 1.41763700  | 2.38875100  | 2.03082300  |
| H               | 0.28035400  | 0.27262600  | 3.55248300  | P | 0.11201200  | 1.84448400  | 0.81918400  |
| H               | 1.19422900  | 1.43950500  | 4.53868400  | C | -1.44609000 | 2.50851600  | 1.52730400  |
| C               | 4.31537800  | -0.19647100 | 2.50029300  | C | -2.30587900 | 1.61172600  | 2.17892200  |
| H               | 4.98328000  | 0.41412400  | 1.87542100  | C | -3.50391900 | 2.05870000  | 2.74207500  |
| H               | 4.49811400  | 0.08413500  | 3.55009600  | C | -3.85251300 | 3.41021200  | 2.65274000  |
| H               | 4.59572300  | -1.25225300 | 2.38084700  | C | -2.99961300 | 4.31065600  | 2.00311800  |
| Co              | 0.19235300  | -0.37204400 | -0.05765300 | C | -1.80108800 | 3.86367400  | 1.44085600  |
|                 |             |             |             | C | 0.33245100  | 2.87902500  | -0.68222100 |
| 12 <sub>T</sub> |             |             |             | C | -0.51012000 | 2.61094000  | -1.77787200 |
| C               | -4.57265800 | -1.85655700 | -0.59537000 | C | 1.31346300  | 3.87363700  | -0.80995200 |
| C               | -5.22105700 | -1.95232900 | -1.83919600 | C | 1.46992100  | 4.56421400  | -2.01698500 |
| C               | -6.61425700 | -2.00832400 | -1.92425700 | C | 0.64259500  | 4.27890200  | -3.10559800 |
| C               | -7.39580200 | -1.96306300 | -0.76576000 | C | -0.35694600 | 3.30732700  | -2.97769700 |
| C               | -6.76635100 | -1.85525500 | 0.47613700  | C | 3.12615200  | -2.26498700 | 0.88881100  |

|    |             |             |             |                    |             |             |             |
|----|-------------|-------------|-------------|--------------------|-------------|-------------|-------------|
| C  | 3.39704400  | -3.19509100 | -0.13005700 |                    |             |             |             |
| C  | 3.73831800  | -4.51388300 | 0.18241600  | cat'' <sub>D</sub> |             |             |             |
| C  | 3.80808800  | -4.92744700 | 1.51628000  | P                  | 1.60335900  | -0.47096800 | 0.08940000  |
| C  | 3.52701800  | -4.01326400 | 2.53682300  | C                  | 1.30017400  | -0.86276100 | 1.89988800  |
| C  | 3.18360900  | -2.69486000 | 2.22694700  | C                  | -0.08080600 | -0.39065000 | 2.40259100  |
| C  | 3.29538800  | -0.13569300 | -1.08505100 | C                  | -1.35096700 | -1.00714100 | 1.78378000  |
| C  | 4.64105200  | -0.42541200 | -1.37491700 | P                  | -1.64608200 | -0.47738200 | 0.00777200  |
| C  | 2.53028500  | 0.55749700  | -2.03612800 | C                  | -3.36873600 | -1.10070100 | -0.26277300 |
| C  | 3.09779300  | 0.97518300  | -3.24336100 | C                  | -3.52699100 | -2.18976600 | -1.13127800 |
| C  | 4.43798400  | 0.69119200  | -3.51847900 | C                  | -4.79209200 | -2.73706000 | -1.36581200 |
| C  | 5.20601800  | -0.01423400 | -2.58423400 | C                  | -5.91539900 | -2.18729900 | -0.73947300 |
| H  | 2.87655200  | 0.13138700  | 2.73011700  | C                  | -5.76763200 | -1.09369000 | 0.12283500  |
| H  | 3.05115400  | 2.29821700  | 0.57578500  | C                  | -4.50081300 | -0.55318300 | 0.36089200  |
| H  | 3.52644000  | 2.58111600  | 2.24069400  | C                  | -1.86126100 | 1.34046200  | 0.06354300  |
| H  | 1.38414000  | 3.49001600  | 2.04497700  | C                  | -1.62091500 | 2.03632500  | -1.13942500 |
| H  | -2.02675300 | 0.55778400  | 2.23383600  | C                  | -2.18992900 | 2.08077600  | 1.21416800  |
| H  | -4.16823600 | 1.35006000  | 3.24288100  | C                  | -2.28546100 | 3.47408800  | 1.15902400  |
| H  | -4.79191300 | 3.76324300  | 3.08543700  | C                  | -2.05700000 | 4.15301200  | -0.04399700 |
| H  | -3.27205400 | 5.36665200  | 1.93071300  | C                  | -1.71955400 | 3.42682900  | -1.19262200 |
| H  | -1.14423000 | 4.57023600  | 0.92823600  | C                  | 3.31876100  | -1.11413500 | -0.15540000 |
| H  | -1.30265700 | 1.86308100  | -1.70096900 | C                  | 4.47990800  | -0.35373100 | 0.05077100  |
| H  | 1.96690400  | 4.12376700  | 0.02564100  | C                  | 5.74147900  | -0.91964600 | -0.16026500 |
| H  | 2.24460400  | 5.33029400  | -2.10248700 | C                  | 5.85511900  | -2.25363400 | -0.56850300 |
| H  | 0.77089100  | 4.81475200  | -4.04924900 | C                  | 4.70166500  | -3.01817000 | -0.77760700 |
| H  | -1.01931500 | 3.08571000  | -3.81823900 | C                  | 3.44158100  | -2.44445900 | -0.58518200 |
| H  | 3.33829800  | -2.89166900 | -1.17712600 | C                  | 1.79415400  | 1.33132000  | -0.13139300 |
| H  | 3.94941300  | -5.22160500 | -0.62322500 | C                  | 1.53801400  | 2.32786100  | 0.82951700  |
| H  | 4.07636700  | -5.95834900 | 1.75979400  | C                  | 2.06566600  | 1.74120100  | -1.46003800 |
| H  | 3.57363300  | -4.32699900 | 3.58274500  | C                  | 2.10051500  | 3.09532300  | -1.80058800 |
| H  | 2.95473500  | -2.00130500 | 3.03914300  | C                  | 1.85658500  | 4.07404700  | -0.83149900 |
| H  | 5.24849000  | -0.98405500 | -0.66185100 | C                  | 1.57094500  | 3.68022900  | 0.48414200  |
| H  | 1.48190200  | 0.76958900  | -1.83242600 | H                  | 1.29429100  | -1.96564500 | 1.87455700  |
| H  | 2.48664100  | 1.51789600  | -3.96837300 | H                  | -0.14233400 | 0.70455300  | 2.34454500  |
| H  | 4.88454600  | 1.01180200  | -4.46307800 | H                  | -0.11550300 | -0.63125800 | 3.47998400  |
| H  | 6.25207400  | -0.24661600 | -2.79915300 | H                  | -2.20452700 | -0.63378300 | 2.37443700  |
| C  | 1.04732900  | 1.88110000  | 3.42804600  | H                  | -2.63650200 | -2.60202700 | -1.62063700 |
| H  | 0.13524400  | 2.36634800  | 3.80330200  | H                  | -4.90252400 | -3.58884300 | -2.04243100 |
| H  | 0.87502000  | 0.79251100  | 3.43593600  | H                  | -6.90743200 | -2.60729100 | -0.92501600 |
| H  | 1.86344200  | 2.09811400  | 4.13605500  | H                  | -6.64482000 | -0.66002300 | 0.61047700  |
| C  | 4.80370500  | 0.41617300  | 1.82739200  | H                  | -4.39468100 | 0.30189400  | 1.03305600  |
| H  | 5.26220400  | 0.89449100  | 0.94881300  | H                  | -1.34406400 | 1.46986300  | -2.03327600 |
| H  | 5.17979000  | 0.93800300  | 2.72272900  | H                  | -2.37937100 | 1.57239400  | 2.16132200  |
| H  | 5.15230600  | -0.62555700 | 1.87305500  | H                  | -2.54427700 | 4.03351100  | 2.06204900  |
| Co | 0.15452000  | -0.43311900 | 0.50020000  | H                  | -2.13189200 | 5.24249900  | -0.08361000 |

|                          |             |             |             |                        |             |             |             |
|--------------------------|-------------|-------------|-------------|------------------------|-------------|-------------|-------------|
| H                        | -1.52334100 | 3.94865100  | -2.13279300 | C                      | 3.46926400  | -2.40909700 | -0.56582500 |
| H                        | 4.39766000  | 0.68528200  | 0.37865700  | C                      | 1.74818700  | 1.33397200  | -0.15186200 |
| H                        | 6.64050300  | -0.31768300 | -0.00281400 | C                      | 1.46901000  | 2.34639500  | 0.78806900  |
| H                        | 6.84223600  | -2.69471100 | -0.72986000 | C                      | 2.01903200  | 1.72371700  | -1.48724000 |
| H                        | 4.78447900  | -4.05868800 | -1.10311400 | C                      | 2.02685800  | 3.07071900  | -1.85539800 |
| H                        | 2.53026200  | -3.02039200 | -0.78369400 | C                      | 1.76143000  | 4.06465100  | -0.90719200 |
| H                        | 1.30386800  | 2.05912300  | 1.85838000  | C                      | 1.47790100  | 3.69095200  | 0.41503700  |
| H                        | 2.25308000  | 0.98351500  | -2.22623900 | H                      | 1.35218600  | -1.93131100 | 1.92343000  |
| H                        | 2.31636600  | 3.38732400  | -2.83208300 | H                      | -0.14727100 | 0.70359000  | 2.39746800  |
| H                        | 1.88079800  | 5.13364700  | -1.09739900 | H                      | -0.09867000 | -0.65095300 | 3.50898500  |
| H                        | 1.36795300  | 4.43391100  | 1.24927500  | H                      | -2.18482100 | -0.68335500 | 2.39429700  |
| C                        | -1.35727000 | -2.53754100 | 1.85010700  | H                      | -2.55881900 | -2.58975600 | -1.64253800 |
| H                        | -2.33847500 | -2.94901900 | 1.57006900  | H                      | -4.80508500 | -3.61884300 | -2.08108300 |
| H                        | -0.60963300 | -2.97054500 | 1.16656100  | H                      | -6.82927300 | -2.70045700 | -0.94508000 |
| H                        | -1.12667000 | -2.87994700 | 2.87310400  | H                      | -6.60667700 | -0.77653800 | 0.62582000  |
| C                        | 2.41449200  | -0.43159800 | 2.85736500  | H                      | -4.37619200 | 0.22403500  | 1.06596000  |
| H                        | 2.51619800  | 0.66235700  | 2.91333900  | H                      | -1.41105800 | 1.47242200  | -2.01656300 |
| H                        | 2.19537500  | -0.79562900 | 3.87550500  | H                      | -2.34802400 | 1.54987400  | 2.20147700  |
| H                        | 3.38851700  | -0.84452900 | 2.55930500  | H                      | -2.58658000 | 4.00551900  | 2.10450700  |
| Co                       | 0.00629300  | -1.20633700 | -1.28243900 | H                      | -2.26705100 | 5.22241500  | -0.05196000 |
|                          |             |             |             | H                      | -1.67304200 | 3.94355400  | -2.11555000 |
| <b>cat''<sub>Q</sub></b> |             |             |             | H                      | 4.37200200  | 0.74018000  | 0.38440600  |
| P                        | 1.59649200  | -0.46419200 | 0.10749200  | H                      | 6.63143400  | -0.22333000 | -0.00190700 |
| C                        | 1.32482900  | -0.82816300 | 1.92903600  | H                      | 6.87346100  | -2.59948600 | -0.71927600 |
| C                        | -0.06558700 | -0.39134400 | 2.43579700  | H                      | 4.83939400  | -4.00177300 | -1.08025700 |
| C                        | -1.31967000 | -1.02313100 | 1.80017900  | H                      | 2.56814700  | -3.00088000 | -0.76325800 |
| P                        | -1.61136400 | -0.47841300 | 0.02980000  | H                      | 1.23431700  | 2.09413800  | 1.82099300  |
| C                        | -3.32244200 | -1.13300700 | -0.25557900 | H                      | 2.22493800  | 0.95465900  | -2.23736700 |
| C                        | -3.45850300 | -2.20825500 | -1.14411800 | H                      | 2.24121900  | 3.34553300  | -2.89195900 |
| C                        | -4.71194300 | -2.77760700 | -1.38875800 | H                      | 1.76701000  | 5.11898700  | -1.19401700 |
| C                        | -5.84613400 | -2.26322900 | -0.75201600 | H                      | 1.25758900  | 4.45588500  | 1.16410200  |
| C                        | -5.72077700 | -1.18288600 | 0.13041700  | C                      | -1.28450300 | -2.55476000 | 1.82917900  |
| C                        | -4.46525200 | -0.62073600 | 0.37827500  | H                      | -2.25804400 | -2.98610600 | 1.55256700  |
| C                        | -1.87324500 | 1.33081100  | 0.09224800  | H                      | -0.53524900 | -2.94792500 | 1.12341100  |
| C                        | -1.68476300 | 2.03153000  | -1.11713400 | H                      | -1.02840300 | -2.91723500 | 2.83891700  |
| C                        | -2.19551100 | 2.06256600  | 1.25001900  | C                      | 2.43166100  | -0.34643500 | 2.87055000  |
| C                        | -2.33396600 | 3.45255900  | 1.19572100  | H                      | 2.50351500  | 0.75091500  | 2.90196500  |
| C                        | -2.15801700 | 4.13579900  | -0.01318600 | H                      | 2.22792100  | -0.69351600 | 3.89795000  |
| C                        | -1.82871300 | 3.41775600  | -1.17002600 | H                      | 3.41480900  | -0.73955600 | 2.57598900  |
| C                        | 3.32374000  | -1.08030800 | -0.13925400 | Co                     | 0.02726800  | -1.21363900 | -1.30956000 |
| C                        | 4.47179800  | -0.29856600 | 0.06050400  |                        |             |             |             |
| C                        | 5.74289100  | -0.84226600 | -0.15303000 | <b>I''<sub>D</sub></b> |             |             |             |
| C                        | 5.87910900  | -2.17561900 | -0.55617500 | C                      | 4.39231300  | -1.16211000 | -0.65414600 |
| C                        | 4.73884200  | -2.96157900 | -0.75868500 | C                      | 5.20484700  | -1.51261200 | -1.74717600 |

|   |             |             |             |   |             |             |             |
|---|-------------|-------------|-------------|---|-------------|-------------|-------------|
| C | 6.30441600  | -2.36128400 | -1.58902500 | C | -5.91539300 | -0.87040600 | -1.24851500 |
| C | 6.61853600  | -2.88143900 | -0.32951100 | C | -4.79835900 | -0.93662100 | -2.08731700 |
| C | 5.82241600  | -2.53879400 | 0.76719900  | C | 0.35193600  | 3.20556300  | 0.52392400  |
| C | 4.72503400  | -1.68705800 | 0.60653900  | C | -0.05464000 | 4.43897200  | -0.00852800 |
| H | 4.98337900  | -1.11338500 | -2.73877400 | C | 0.77264900  | 5.56222900  | 0.09581200  |
| H | 6.91901400  | -2.61698900 | -2.45651700 | C | 2.00897000  | 5.47018700  | 0.74226000  |
| H | 7.47684300  | -3.54661900 | -0.20454700 | C | 2.41806300  | 4.24477700  | 1.28010100  |
| H | 6.05648100  | -2.93542600 | 1.75898300  | C | 1.59994000  | 3.11837400  | 1.16718700  |
| H | 4.11514300  | -1.41853300 | 1.46965500  | C | -2.12416400 | 2.16957300  | -0.53473700 |
| C | 3.21328900  | -0.20543700 | -0.84257200 | C | -3.44311900 | 2.22340400  | -0.05799800 |
| C | 2.13542600  | -0.40915100 | 0.24437500  | C | -1.89720300 | 2.41057100  | -1.90389500 |
| O | 2.27371600  | -0.00786400 | 1.43651900  | C | -2.95514800 | 2.70079200  | -2.76642300 |
| H | 1.62450700  | -1.45129900 | 0.10137500  | C | -4.26632800 | 2.74448700  | -2.27938000 |
| C | 2.44806800  | -0.48363800 | -2.15203700 | C | -4.50426900 | 2.50608600  | -0.92395500 |
| H | 2.32100000  | -1.57267000 | -2.26516300 | H | -0.18610200 | 1.28434600  | 2.71852100  |
| H | 3.01983200  | -0.13661500 | -3.02830500 | H | -3.11754500 | 0.57607800  | 2.17589700  |
| C | 3.72992600  | 1.26111800  | -0.84396400 | H | -2.28095700 | 0.41736300  | 3.70390500  |
| H | 2.84684200  | 1.92137400  | -0.84030700 | H | -2.52798600 | -1.72578100 | 2.71534900  |
| H | 4.26533500  | 1.43912700  | -1.79107700 | H | 0.42220900  | -3.21679900 | -0.58270200 |
| C | 1.08527600  | 0.16958500  | -2.10678900 | H | 0.69181900  | -5.69362100 | -0.65222500 |
| C | -0.08679100 | -0.54708900 | -2.35157400 | H | -1.07066700 | -7.16540600 | 0.32605600  |
| H | 1.07406600  | 1.25931700  | -2.21532500 | H | -3.10079800 | -6.14963500 | 1.36166400  |
| H | -0.99595900 | -0.03055600 | -2.66621600 | H | -3.37221700 | -3.68622000 | 1.41623400  |
| H | -0.03273200 | -1.60849300 | -2.61949900 | H | -2.65794500 | -1.14685200 | -2.20582100 |
| C | 4.62120600  | 1.62637500  | 0.30618800  | H | -4.36973000 | -1.25735700 | 1.75912800  |
| C | 5.84646300  | 2.14832400  | 0.18508300  | H | -6.61516700 | -0.94249300 | 0.79773100  |
| H | 4.20748400  | 1.43269500  | 1.29985600  | H | -6.91326400 | -0.73010800 | -1.67140800 |
| H | 6.44922100  | 2.40439500  | 1.06254400  | H | -4.91846500 | -0.84992200 | -3.16998900 |
| H | 6.29413200  | 2.33980500  | -0.79740500 | H | -1.02263400 | 4.53239900  | -0.50279700 |
| P | -0.66554200 | 1.66898200  | 0.46189000  | H | 0.44388100  | 6.51578400  | -0.32586200 |
| C | -1.16543600 | 1.52296700  | 2.27052100  | H | 2.65265700  | 6.34969000  | 0.82492100  |
| C | -2.13140600 | 0.36872300  | 2.61099600  | H | 3.38699900  | 4.16051200  | 1.77800700  |
| C | -1.72980100 | -1.08706600 | 2.30366800  | H | 1.93246100  | 2.15382400  | 1.55877200  |
| P | -1.62538400 | -1.44615900 | 0.47282300  | H | -3.66064000 | 2.03800300  | 0.99114300  |
| C | -1.48318800 | -3.28569300 | 0.42811800  | H | -0.87939300 | 2.37514800  | -2.29769300 |
| C | -0.34755900 | -3.86453100 | -0.15643500 | H | -2.75510700 | 2.88667300  | -3.82468700 |
| C | -0.19804900 | -5.25499500 | -0.19355700 | H | -5.09763300 | 2.96037000  | -2.95498400 |
| C | -1.18537800 | -6.07881600 | 0.35380900  | H | -5.52376400 | 2.53387700  | -0.53222100 |
| C | -2.32484400 | -5.50869200 | 0.93514500  | C | -0.40589700 | -1.48947000 | 2.96053900  |
| C | -2.47503700 | -4.12070000 | 0.96911700  | H | -0.21292500 | -2.56681100 | 2.84114400  |
| C | -3.34123800 | -1.20771400 | -0.15504600 | H | 0.45053600  | -0.94485300 | 2.53161000  |
| C | -3.52260500 | -1.10118900 | -1.54434700 | H | -0.44376200 | -1.27367500 | 4.04156500  |
| C | -4.47120700 | -1.15855000 | 0.67794100  | C | -1.65737700 | 2.83075200  | 2.89900600  |
| C | -5.74771100 | -0.98573400 | 0.13420400  | H | -2.62530500 | 3.15173600  | 2.48597200  |

|            |             |             |             |   |             |             |             |
|------------|-------------|-------------|-------------|---|-------------|-------------|-------------|
| H          | -1.79026400 | 2.69506900  | 3.98525400  | C | -0.24781500 | 6.07009400  | 0.26520800  |
| H          | -0.93989200 | 3.64909200  | 2.74882000  | C | 0.93085600  | 5.78239400  | 0.96513700  |
| Co         | 0.19449700  | -0.31408900 | -0.27897200 | C | 1.40666200  | 4.47089800  | 1.02980400  |
|            |             |             |             | C | 2.99544200  | 1.78125100  | -0.15246700 |
| <b>1"Q</b> |             |             |             | C | 3.24283300  | 1.48079000  | -1.50143700 |
| C          | -4.54677700 | 0.59723700  | -0.59209300 | C | 4.07658600  | 2.14856700  | 0.66676300  |
| C          | -5.36670500 | 0.91588000  | -1.68891600 | C | 5.37326800  | 2.20473700  | 0.14743700  |
| C          | -6.59889700 | 1.55561100  | -1.51351500 | C | 5.60723500  | 1.90484200  | -1.19822600 |
| C          | -7.04513600 | 1.88917000  | -0.23184100 | C | 4.53655800  | 1.54793800  | -2.02314600 |
| C          | -6.24623300 | 1.56987700  | 0.87118700  | C | 0.38674000  | -3.27616300 | 0.51138900  |
| C          | -5.01545200 | 0.93311300  | 0.69163200  | C | 1.05609200  | -4.45033700 | 0.13333900  |
| H          | -5.05062500 | 0.65704400  | -2.70076200 | C | 0.40824300  | -5.68724600 | 0.21272100  |
| H          | -7.21266900 | 1.79304900  | -2.38687100 | C | -0.90948900 | -5.76438700 | 0.67564700  |
| H          | -8.00654500 | 2.39047700  | -0.09303300 | C | -1.57843100 | -4.59718100 | 1.06023000  |
| H          | -6.58302100 | 1.81872900  | 1.88142800  | C | -0.93879900 | -3.35713800 | 0.97561000  |
| H          | -4.40318700 | 0.68068300  | 1.55858900  | C | 2.69481900  | -1.85209500 | -0.48602700 |
| C          | -3.20873500 | -0.13288700 | -0.76778000 | C | 3.99068200  | -1.64316300 | 0.01070700  |
| C          | -2.26450800 | 0.17969200  | 0.42938700  | C | 2.54212700  | -2.17807800 | -1.84838100 |
| O          | -2.32497600 | -0.49872700 | 1.53286600  | C | 3.65255500  | -2.30753600 | -2.68282900 |
| H          | -2.13701600 | 1.29177800  | 0.52399900  | C | 4.94035900  | -2.09856300 | -2.17510600 |
| C          | -2.47674000 | 0.35340300  | -2.04518800 | C | 5.10313100  | -1.76517400 | -0.82870500 |
| H          | -2.37892600 | 1.45126000  | -2.00546200 | H | 0.49596600  | -1.28794100 | 2.67553700  |
| H          | -3.07530500 | 0.12493700  | -2.94379400 | H | 3.19211200  | 0.07832400  | 2.15492700  |
| C          | -3.48404000 | -1.66030900 | -0.89192900 | H | 2.35258500  | 0.03717500  | 3.69111800  |
| H          | -2.51242600 | -2.17807500 | -0.84890100 | H | 2.06315700  | 2.16411800  | 2.68687400  |
| H          | -3.91620900 | -1.86043600 | -1.88689000 | H | -1.01900300 | 2.92149000  | -0.79865800 |
| C          | -1.10567000 | -0.26645800 | -2.20378100 | H | -1.86764200 | 5.25973000  | -0.92020700 |
| C          | 0.02227400  | 0.42784200  | -2.58309100 | H | -0.61702800 | 7.09759600  | 0.21539200  |
| H          | -1.07982800 | -1.35981400 | -2.27600300 | H | 1.48186500  | 6.58526100  | 1.46170300  |
| H          | 0.91268100  | -0.09762300 | -2.93457100 | H | 2.32961400  | 4.25860100  | 1.57451900  |
| H          | -0.00747200 | 1.51014700  | -2.74165400 | H | 2.41638700  | 1.17945200  | -2.14320300 |
| C          | -4.37614600 | -2.24425600 | 0.16333400  | H | 3.91749600  | 2.39275300  | 1.71815200  |
| C          | -5.50812500 | -2.91476600 | -0.07790400 | H | 6.20468900  | 2.48473600  | 0.79935800  |
| H          | -4.03883400 | -2.08413100 | 1.19147800  | H | 6.62234800  | 1.94531100  | -1.60100600 |
| H          | -6.11332400 | -3.32941600 | 0.73505600  | H | 4.70933700  | 1.30466700  | -3.07419900 |
| H          | -5.87516100 | -3.07330800 | -1.09906700 | H | 2.08742200  | -4.40505000 | -0.22098500 |
| P          | 1.14118800  | -1.59904400 | 0.45448500  | H | 0.93846600  | -6.59544600 | -0.08587100 |
| C          | 1.52210000  | -1.31166800 | 2.27101200  | H | -1.41397700 | -6.73223900 | 0.73500700  |
| C          | 2.18803300  | 0.04000100  | 2.59941300  | H | -2.61079000 | -4.64799200 | 1.41564300  |
| C          | 1.43819300  | 1.34958500  | 2.28734800  | H | -1.46968700 | -2.44220800 | 1.26360800  |
| P          | 1.25684800  | 1.67426900  | 0.45452800  | H | 4.15006500  | -1.37387100 | 1.05272700  |
| C          | 0.70494000  | 3.43095700  | 0.39778600  | H | 1.54099500  | -2.33601800 | -2.25784900 |
| C          | -0.47327700 | 3.72754800  | -0.30375500 | H | 3.51195000  | -2.56598400 | -3.73542900 |
| C          | -0.94844500 | 5.04157200  | -0.37060200 | H | 5.81081100  | -2.18969500 | -2.82938200 |

|                          |             |             |             |   |             |             |             |
|--------------------------|-------------|-------------|-------------|---|-------------|-------------|-------------|
| H                        | 6.10274900  | -1.59133000 | -0.42317100 | C | 1.42812100  | -1.68273600 | 2.22761400  |
| C                        | 0.06551700  | 1.43391300  | 2.96292700  | C | 2.39532900  | -0.49228000 | 2.39148500  |
| H                        | -0.38069800 | 2.43154800  | 2.82728900  | C | 1.84002300  | 0.94879000  | 2.32036400  |
| H                        | -0.65072600 | 0.69284300  | 2.57302800  | P | 1.38446200  | 1.48577400  | 0.58667000  |
| H                        | 0.17656700  | 1.26542800  | 4.04750800  | C | 0.91722900  | 3.26098500  | 0.81628600  |
| C                        | 2.26367600  | -2.46540100 | 2.95240100  | C | -0.36609700 | 3.69440900  | 0.45682300  |
| H                        | 3.30181200  | -2.55820700 | 2.60096000  | C | -0.73902600 | 5.03184500  | 0.62968500  |
| H                        | 2.29737500  | -2.29358600 | 4.04103800  | C | 0.16987200  | 5.94767400  | 1.16637000  |
| H                        | 1.76216400  | -3.42854500 | 2.78136500  | C | 1.45619600  | 5.52366200  | 1.52431100  |
| Co                       | -0.22912000 | 0.08483600  | -0.32517300 | C | 1.82971000  | 4.19007200  | 1.34502700  |
|                          |             |             |             | C | 2.98291800  | 1.71691000  | -0.30161200 |
|                          |             |             |             | C | 2.90223700  | 2.17086600  | -1.63130900 |
|                          |             |             |             | C | 4.24761300  | 1.44602300  | 0.24072300  |
|                          |             |             |             | C | 5.40172100  | 1.59868000  | -0.53684000 |
|                          |             |             |             | C | 5.30935300  | 2.03454700  | -1.86054300 |
|                          |             |             |             | C | 4.05294100  | 2.33040200  | -2.40384000 |
|                          |             |             |             | C | -0.25345400 | -3.30976700 | 0.44865100  |
|                          |             |             |             | C | -0.31060300 | -4.13080100 | -0.69093600 |
|                          |             |             |             | C | -1.23159600 | -5.17921300 | -0.76918400 |
|                          |             |             |             | C | -2.11069600 | -5.42408000 | 0.29045100  |
|                          |             |             |             | C | -2.06257000 | -4.61086600 | 1.42786000  |
|                          |             |             |             | C | -1.14569400 | -3.55974100 | 1.50668600  |
|                          |             |             |             | C | 2.25617600  | -2.29385200 | -0.54507100 |
|                          |             |             |             | C | 2.92511100  | -3.52230300 | -0.39636100 |
|                          |             |             |             | C | 2.71615300  | -1.38332700 | -1.50796900 |
|                          |             |             |             | C | 3.83904000  | -1.67363200 | -2.28868100 |
|                          |             |             |             | C | 4.50915800  | -2.88809200 | -2.12031600 |
|                          |             |             |             | C | 4.04579700  | -3.81411000 | -1.17729700 |
|                          |             |             |             | H | 0.50889200  | -1.47295000 | 2.79697400  |
|                          |             |             |             | H | 3.22928200  | -0.61985300 | 1.68434500  |
|                          |             |             |             | H | 2.84258800  | -0.59338200 | 3.39540200  |
|                          |             |             |             | H | 2.64592900  | 1.61793200  | 2.66314200  |
|                          |             |             |             | H | -1.07448800 | 2.97292700  | 0.04370200  |
|                          |             |             |             | H | -1.74285600 | 5.35516100  | 0.34217500  |
|                          |             |             |             | H | -0.11951000 | 6.99275100  | 1.30364600  |
|                          |             |             |             | H | 2.17149900  | 6.23729800  | 1.94146900  |
|                          |             |             |             | H | 2.83920700  | 3.87032500  | 1.61597000  |
|                          |             |             |             | H | 1.92561800  | 2.40139900  | -2.06318000 |
|                          |             |             |             | H | 4.35069100  | 1.11501400  | 1.27375200  |
|                          |             |             |             | H | 6.37853200  | 1.37687100  | -0.09942900 |
|                          |             |             |             | H | 6.21134600  | 2.14916400  | -2.46672800 |
|                          |             |             |             | H | 3.96983500  | 2.68312200  | -3.43501300 |
|                          |             |             |             | H | 0.36337700  | -3.94659700 | -1.52957400 |
|                          |             |             |             | H | -1.26197000 | -5.80640700 | -1.66393200 |
| <b>TS1''<sub>b</sub></b> |             |             |             |   |             |             |             |
| C                        | -3.65551400 | 0.86755500  | -1.00037000 |   |             |             |             |
| C                        | -3.99074300 | 1.18028200  | -2.32683800 |   |             |             |             |
| C                        | -4.52453000 | 2.42847900  | -2.66609100 |   |             |             |             |
| C                        | -4.73495200 | 3.39824900  | -1.68226200 |   |             |             |             |
| C                        | -4.41954300 | 3.09874900  | -0.35275700 |   |             |             |             |
| C                        | -3.89402100 | 1.84830600  | -0.01912000 |   |             |             |             |
| H                        | -3.82905900 | 0.44734800  | -3.11818000 |   |             |             |             |
| H                        | -4.77138400 | 2.64307400  | -3.70932700 |   |             |             |             |
| H                        | -5.14366700 | 4.37662300  | -1.94741000 |   |             |             |             |
| H                        | -4.58364400 | 3.84195100  | 0.43205700  |   |             |             |             |
| H                        | -3.65794500 | 1.63457200  | 1.02402300  |   |             |             |             |
| C                        | -3.09599100 | -0.49841000 | -0.59835200 |   |             |             |             |
| C                        | -2.05605500 | -0.31413300 | 0.56619200  |   |             |             |             |
| O                        | -2.35468800 | -0.61974600 | 1.72695700  |   |             |             |             |
| H                        | -1.47973800 | 0.98235900  | 0.43893100  |   |             |             |             |
| C                        | -2.31079000 | -1.20810400 | -1.71885800 |   |             |             |             |
| H                        | -2.89565700 | -1.24685300 | -2.65421100 |   |             |             |             |
| H                        | -2.19161200 | -2.25569400 | -1.40773400 |   |             |             |             |
| C                        | -4.26296800 | -1.43769900 | -0.16809400 |   |             |             |             |
| H                        | -3.79789400 | -2.35229300 | 0.23763900  |   |             |             |             |
| H                        | -4.81686600 | -1.72473200 | -1.07729300 |   |             |             |             |
| C                        | -0.92470800 | -0.65650700 | -1.97880400 |   |             |             |             |
| C                        | -0.56973800 | 0.66390400  | -2.14084000 |   |             |             |             |
| H                        | -0.19781800 | -1.40831100 | -2.30527300 |   |             |             |             |
| H                        | 0.39785500  | 0.90926800  | -2.58376900 |   |             |             |             |
| H                        | -1.29654900 | 1.47616100  | -2.08742500 |   |             |             |             |
| C                        | -5.22135800 | -0.89252600 | 0.84802000  |   |             |             |             |
| C                        | -6.52218000 | -0.67253000 | 0.63056100  |   |             |             |             |
| H                        | -4.78606200 | -0.67156000 | 1.82726100  |   |             |             |             |
| H                        | -7.17724800 | -0.28116700 | 1.41583300  |   |             |             |             |
| H                        | -6.98193300 | -0.87315000 | -0.34444700 |   |             |             |             |
| P                        | 0.79930500  | -1.80747800 | 0.46611100  |   |             |             |             |

|              |             |             |             |   |             |             |             |
|--------------|-------------|-------------|-------------|---|-------------|-------------|-------------|
| H            | -2.83070300 | -6.24404600 | 0.23037700  | H | -1.58382800 | 0.26159000  | -2.89878800 |
| H            | -2.74832600 | -4.79144000 | 2.25969400  | C | -4.86866200 | -1.12268200 | 1.37944700  |
| H            | -1.14413700 | -2.91793800 | 2.38760100  | C | -6.20216900 | -1.19523200 | 1.30841900  |
| H            | 2.56205200  | -4.26075700 | 0.31932200  | H | -4.39264700 | -0.48577700 | 2.13040400  |
| H            | 2.18773800  | -0.44108900 | -1.63889300 | H | -6.84482700 | -0.63530900 | 1.99576700  |
| H            | 4.18649600  | -0.94756900 | -3.02755900 | H | -6.70303100 | -1.81514400 | 0.55517800  |
| H            | 5.38763300  | -3.11977900 | -2.72802700 | P | 1.30316600  | -1.62092100 | 0.50522000  |
| H            | 4.55956100  | -4.77061800 | -1.05152800 | C | 1.95870300  | -1.25970800 | 2.22437100  |
| C            | 0.62584100  | 1.14942900  | 3.23525700  | C | 2.68932400  | 0.09417800  | 2.28521300  |
| H            | 0.36037900  | 2.21365000  | 3.31766200  | C | 1.82923100  | 1.37299000  | 2.32932100  |
| H            | -0.26295200 | 0.61241000  | 2.86645800  | P | 1.08965500  | 1.79969600  | 0.66801100  |
| H            | 0.85184900  | 0.77823300  | 4.24864700  | C | 0.16676400  | 3.35039000  | 1.02089200  |
| C            | 2.06599900  | -2.95630200 | 2.78419600  | C | -1.18322600 | 3.23513800  | 1.40149200  |
| H            | 3.05154700  | -3.14066600 | 2.33053100  | C | -1.93345200 | 4.37959400  | 1.68447000  |
| H            | 2.21733000  | -2.85236900 | 3.87149100  | C | -1.35191300 | 5.64801400  | 1.57709200  |
| H            | 1.43911600  | -3.84355500 | 2.61494600  | C | -0.01229700 | 5.76808100  | 1.19326000  |
| Co           | -0.25361400 | 0.07799500  | 0.02234100  | C | 0.74473300  | 4.62469300  | 0.91651100  |
| <b>TS1"Q</b> |             |             |             | C | 2.49527100  | 2.37751000  | -0.36291600 |
| C            | -3.79082000 | -0.01041500 | -1.19982800 | C | 2.22342300  | 2.56868500  | -1.73123100 |
| C            | -4.19633400 | -0.19937900 | -2.53087200 | C | 3.80506500  | 2.57231200  | 0.09969900  |
| C            | -4.97320900 | 0.75749600  | -3.19821200 | C | 4.82276800  | 2.93869100  | -0.78869200 |
| C            | -5.37245400 | 1.92485400  | -2.54599400 | C | 4.54243900  | 3.12724500  | -2.14460500 |
| C            | -4.98796900 | 2.12337400  | -1.21260300 | C | 3.23525600  | 2.94861200  | -2.61376400 |
| C            | -4.21252700 | 1.17057600  | -0.55436800 | C | 0.47315600  | -3.24015400 | 0.70090700  |
| H            | -3.90240300 | -1.09955400 | -3.07153000 | C | 0.60187700  | -4.27338400 | -0.24301400 |
| H            | -5.26498100 | 0.58245100  | -4.23750300 | C | -0.18464300 | -5.42532700 | -0.14914600 |
| H            | -5.97664800 | 2.67255400  | -3.06628200 | C | -1.11092100 | -5.56613000 | 0.88886800  |
| H            | -5.28895200 | 3.03248900  | -0.68461800 | C | -1.24886400 | -4.54205300 | 1.83187600  |
| H            | -3.90661000 | 1.34748100  | 0.47661400  | C | -0.47163300 | -3.38604700 | 1.73474500  |
| C            | -2.97248200 | -1.04143800 | -0.43015300 | C | 2.79876100  | -1.92963600 | -0.51380300 |
| C            | -1.84539400 | -0.33654300 | 0.43758900  | C | 3.65990400  | -3.03321200 | -0.37204500 |
| O            | -2.11114700 | 0.00577900  | 1.59437100  | C | 3.09702200  | -0.95806000 | -1.48449500 |
| H            | -1.44001700 | 1.15348600  | -0.65220600 | C | 4.23859000  | -1.06861700 | -2.28319100 |
| C            | -2.23432700 | -2.06931500 | -1.31566800 | C | 5.09126600  | -2.16512800 | -2.12907400 |
| H            | -2.91981000 | -2.51257200 | -2.05913800 | C | 4.79617000  | -3.14841200 | -1.17684600 |
| H            | -1.94665700 | -2.90220800 | -0.66021000 | H | 1.04500400  | -1.19635300 | 2.83388200  |
| C            | -3.92406800 | -1.87471100 | 0.49175400  | H | 3.42875800  | 0.15117400  | 1.46989300  |
| H            | -3.27444300 | -2.50513600 | 1.12307900  | H | 3.27965200  | 0.09251700  | 3.21743400  |
| H            | -4.50188800 | -2.55458800 | -0.15691400 | H | 2.50066600  | 2.20659600  | 2.59071700  |
| C            | -0.97257400 | -1.59936600 | -2.00033300 | H | -1.63438500 | 2.24360100  | 1.49045100  |
| C            | -0.78549300 | -0.45950600 | -2.72114400 | H | -2.98016400 | 4.27995100  | 1.98395900  |
| H            | -0.15929200 | -2.33247400 | -2.01412100 | H | -1.94271000 | 6.54250300  | 1.79088400  |
| H            | 0.14537400  | -0.31320600 | -3.27906600 | H | 0.44727800  | 6.75625000  | 1.10765600  |
|              |             |             |             | H | 1.78928700  | 4.72864500  | 0.61506600  |

|                        |             |             |             |   |             |             |             |
|------------------------|-------------|-------------|-------------|---|-------------|-------------|-------------|
| H                      | 1.20817600  | 2.40669000  | -2.10549400 | C | -4.47643500 | -0.73814000 | -0.23139100 |
| H                      | 4.04771900  | 2.43791400  | 1.15467200  | H | -4.17468600 | -1.73282100 | 0.13990300  |
| H                      | 5.84040900  | 3.07828300  | -0.41520300 | H | -5.04349400 | -0.89486900 | -1.16419000 |
| H                      | 5.33981400  | 3.41167300  | -2.83563900 | C | -1.04919900 | -0.39136500 | -2.03540900 |
| H                      | 3.00669500  | 3.09500800  | -3.67242000 | C | -0.50678300 | 0.85215400  | -2.16461300 |
| H                      | 1.31198300  | -4.17978100 | -1.06605200 | H | -0.42470500 | -1.24060100 | -2.33164400 |
| H                      | -0.07139000 | -6.21696800 | -0.89428500 | H | 0.50793500  | 0.96049500  | -2.55463800 |
| H                      | -1.72489900 | -6.46721400 | 0.96071300  | H | -1.09614600 | 1.76395300  | -2.07111800 |
| H                      | -1.97534100 | -4.63661100 | 2.64283900  | C | -5.36688800 | -0.09067700 | 0.78619000  |
| H                      | -0.62012900 | -2.58296800 | 2.45872800  | C | -6.61101000 | 0.33777300  | 0.54813500  |
| H                      | 3.44161700  | -3.81163000 | 0.35991400  | H | -4.93201600 | 0.02099300  | 1.78386300  |
| H                      | 2.42744100  | -0.10489600 | -1.60688100 | H | -7.22072700 | 0.79545600  | 1.33402300  |
| H                      | 4.45623400  | -0.29803400 | -3.02663200 | H | -7.06635300 | 0.25072900  | -0.44555500 |
| H                      | 5.98344100  | -2.25894300 | -2.75336400 | P | 0.37208800  | -1.85209400 | 0.48973000  |
| H                      | 5.45704200  | -4.01097200 | -1.05907900 | C | 0.99689500  | -1.85580800 | 2.25541400  |
| C                      | 0.72388200  | 1.30193800  | 3.39031500  | C | 2.19679900  | -0.90087100 | 2.42016200  |
| H                      | 0.33245600  | 2.30219800  | 3.62303700  | C | 1.97311700  | 0.62381400  | 2.31032700  |
| H                      | -0.12529400 | 0.68260600  | 3.06132100  | P | 1.66605800  | 1.21418500  | 0.55927400  |
| H                      | 1.12879500  | 0.87534200  | 4.32285400  | C | 1.69389300  | 3.05659000  | 0.74113300  |
| C                      | 2.83953300  | -2.37124400 | 2.79745400  | C | 0.62745300  | 3.83617200  | 0.27445800  |
| H                      | 3.81823600  | -2.40491800 | 2.29544000  | C | 0.65656500  | 5.22967200  | 0.39860800  |
| H                      | 3.02332500  | -2.18320100 | 3.86840600  | C | 1.75116900  | 5.85718300  | 0.99867500  |
| H                      | 2.37031900  | -3.36158000 | 2.70446700  | C | 2.82364800  | 5.08640200  | 1.46477300  |
| Co                     | -0.13476900 | 0.13885700  | -0.55265000 | C | 2.79921800  | 3.69697500  | 1.32889900  |
|                        |             |             |             | C | 3.28159900  | 1.02514700  | -0.31556900 |
|                        |             |             |             | C | 3.32349200  | 1.45797400  | -1.65402600 |
|                        |             |             |             | C | 4.44399400  | 0.48382100  | 0.25176100  |
|                        |             |             |             | C | 5.61178100  | 0.35310500  | -0.50917200 |
|                        |             |             |             | C | 5.63797000  | 0.77133200  | -1.84136500 |
|                        |             |             |             | C | 4.48893900  | 1.33430300  | -2.41035600 |
|                        |             |             |             | C | -0.91647300 | -3.15917200 | 0.43423900  |
|                        |             |             |             | C | -1.08327400 | -3.94038500 | -0.72221100 |
|                        |             |             |             | C | -2.15079300 | -4.83585400 | -0.83027500 |
|                        |             |             |             | C | -3.06764400 | -4.96716400 | 0.21709800  |
|                        |             |             |             | C | -2.90810900 | -4.19583300 | 1.37320600  |
|                        |             |             |             | C | -1.84480800 | -3.29610000 | 1.48124700  |
|                        |             |             |             | C | 1.72367100  | -2.57377700 | -0.52691900 |
|                        |             |             |             | C | 2.22261700  | -3.87571100 | -0.33862500 |
|                        |             |             |             | C | 2.27052100  | -1.78038400 | -1.54496200 |
|                        |             |             |             | C | 3.31758400  | -2.25499900 | -2.34041200 |
|                        |             |             |             | C | 3.82491000  | -3.53922200 | -2.12858300 |
|                        |             |             |             | C | 3.27031300  | -4.35062500 | -1.13068900 |
|                        |             |             |             | H | 0.13688200  | -1.44918700 | 2.81032600  |
|                        |             |             |             | H | 2.99298100  | -1.22558700 | 1.73365500  |
| <b>2''<sub>D</sub></b> |             |             |             |   |             |             |             |
| C                      | -3.48691100 | 1.47730900  | -0.92414000 |   |             |             |             |
| C                      | -3.76114400 | 1.90183900  | -2.23320500 |   |             |             |             |
| C                      | -4.09560800 | 3.23209900  | -2.51009000 |   |             |             |             |
| C                      | -4.16037900 | 4.17295600  | -1.47895500 |   |             |             |             |
| C                      | -3.90034300 | 3.76395000  | -0.16678700 |   |             |             |             |
| C                      | -3.57417500 | 2.43321400  | 0.10433900  |   |             |             |             |
| H                      | -3.70915700 | 1.19237400  | -3.06013300 |   |             |             |             |
| H                      | -4.30128800 | 3.53272700  | -3.54096600 |   |             |             |             |
| H                      | -4.41377100 | 5.21411300  | -1.69458800 |   |             |             |             |
| H                      | -3.95168400 | 4.48514400  | 0.65333000  |   |             |             |             |
| H                      | -3.37600800 | 2.13096000  | 1.13279500  |   |             |             |             |
| C                      | -3.16202400 | 0.02018400  | -0.59404800 |   |             |             |             |
| C                      | -2.12223600 | -0.03232700 | 0.58033400  |   |             |             |             |
| O                      | -2.50721000 | -0.23372900 | 1.72821700  |   |             |             |             |
| H                      | -0.94194200 | 1.57956000  | 0.43096800  |   |             |             |             |
| C                      | -2.49077300 | -0.74841900 | -1.75022400 |   |             |             |             |
| H                      | -3.08924800 | -0.66804500 | -2.67381500 |   |             |             |             |
| H                      | -2.51693300 | -1.81344200 | -1.48167000 |   |             |             |             |



|                        |             |             |             |   |             |             |             |
|------------------------|-------------|-------------|-------------|---|-------------|-------------|-------------|
| H                      | 2.59278300  | -1.07454700 | 3.43562800  | C | -2.84012900 | -1.96324700 | 0.14945700  |
| H                      | 2.90268300  | 1.10619200  | 2.65200800  | C | -1.55323200 | -1.20910600 | 0.62813800  |
| H                      | -0.23309000 | 3.33995000  | -0.17710100 | O | -1.27613800 | -1.32917600 | 1.82209900  |
| H                      | -0.18278700 | 5.82323700  | 0.02699600  | H | -0.19996600 | 0.03585200  | -2.12204300 |
| H                      | 1.77296600  | 6.94514000  | 1.10180600  | C | -2.45518800 | -3.46273800 | 0.05414300  |
| H                      | 3.68480500  | 5.57117000  | 1.93197300  | H | -3.37674500 | -4.06500200 | -0.04045500 |
| H                      | 3.65016300  | 3.10809100  | 1.68019700  | H | -2.04314700 | -3.74635700 | 1.03850300  |
| H                      | 2.43102700  | 1.89610000  | -2.10769600 | C | -3.93554500 | -1.88323600 | 1.26601800  |
| H                      | 4.45911800  | 0.16123100  | 1.29241700  | H | -3.51357200 | -2.38576900 | 2.15103500  |
| H                      | 6.50653800  | -0.07679100 | -0.05160900 | H | -4.80689900 | -2.46447600 | 0.92544200  |
| H                      | 6.54993700  | 0.66510800  | -2.43395300 | C | -1.48628900 | -3.92368400 | -0.99567600 |
| H                      | 4.50063800  | 1.67473900  | -3.44885800 | C | -0.83711000 | -3.19349600 | -1.90648500 |
| H                      | -0.37971300 | -3.84498600 | -1.55116300 | H | -1.30541900 | -5.00628700 | -0.97426500 |
| H                      | -2.26574500 | -5.43225500 | -1.73900600 | H | -0.13669900 | -3.66313400 | -2.60385600 |
| H                      | -3.90266700 | -5.66720100 | 0.13343200  | H | -0.95940500 | -2.11036600 | -1.98653700 |
| H                      | -3.62064200 | -4.28904700 | 2.19677500  | C | -4.36320100 | -0.50352200 | 1.66076300  |
| H                      | -1.75634500 | -2.68229100 | 2.37740900  | C | -5.54561000 | 0.04953800  | 1.37086700  |
| H                      | 1.78252400  | -4.52946600 | 0.41475900  | H | -3.63234700 | 0.07656100  | 2.23454400  |
| H                      | 1.86975500  | -0.78233400 | -1.70552800 | H | -5.80071900 | 1.06253400  | 1.69722700  |
| H                      | 3.73498700  | -1.61659700 | -3.12221200 | H | -6.30384600 | -0.49315800 | 0.79470100  |
| H                      | 4.64573000  | -3.91446900 | -2.74508100 | P | 1.83155800  | -1.07574500 | 0.43922200  |
| H                      | 3.65343800  | -5.36190900 | -0.97205200 | C | 2.08777700  | -0.49199200 | 2.20048300  |
| C                      | 0.82213700  | 1.09964500  | 3.20398700  | C | 2.24435700  | 1.04246700  | 2.26325000  |
| H                      | 0.76298800  | 2.19763600  | 3.23317700  | C | 0.97456000  | 1.91728900  | 2.21640800  |
| H                      | -0.14942000 | 0.72184500  | 2.84888600  | P | 0.19543300  | 2.00883000  | 0.52101300  |
| H                      | 0.97318100  | 0.74063500  | 4.23552000  | C | -1.20255400 | 3.17498700  | 0.77563500  |
| C                      | 1.34622100  | -3.22731400 | 2.83655900  | C | -2.47437900 | 2.64722800  | 1.04690500  |
| H                      | 2.29101600  | -3.60868300 | 2.42136900  | C | -3.56405500 | 3.49347500  | 1.26657800  |
| H                      | 1.47828000  | -3.14168600 | 3.92784000  | C | -3.39304300 | 4.88037700  | 1.21429000  |
| H                      | 0.56227500  | -3.97521800 | 2.65149700  | C | -2.12807100 | 5.41500800  | 0.94604000  |
| Co                     | -0.31205800 | 0.24022700  | 0.11726400  | C | -1.03742600 | 4.56872200  | 0.72738900  |
|                        |             |             |             | C | 1.35391200  | 3.00567200  | -0.49597900 |
|                        |             |             |             | C | 1.06720200  | 3.10215300  | -1.86973100 |
| <b>2''<sub>Q</sub></b> |             |             |             | C | 2.49589600  | 3.64775900  | 0.00595500  |
| C                      | -3.41022600 | -1.39028900 | -1.13877500 | C | 3.34272100  | 4.35734500  | -0.85238000 |
| C                      | -4.13817300 | -2.18041700 | -2.04353400 | C | 3.05318600  | 4.44355000  | -2.21658900 |
| C                      | -4.71627700 | -1.62368500 | -3.18806200 | C | 1.90696200  | 3.81957400  | -2.72271500 |
| C                      | -4.58044200 | -0.25690500 | -3.45505400 | C | 1.80382300  | -2.90360600 | 0.53963900  |
| C                      | -3.86604400 | 0.54455200  | -2.56087200 | C | 2.39042100  | -3.68902900 | -0.46691300 |
| C                      | -3.29385000 | -0.01912300 | -1.41704200 | C | 2.25308200  | -5.07963100 | -0.45282700 |
| H                      | -4.25689400 | -3.24963400 | -1.85999600 | C | 1.52422100  | -5.70527100 | 0.56294300  |
| H                      | -5.27407600 | -2.26333100 | -3.87738900 | C | 0.93194800  | -4.92973500 | 1.56524200  |
| H                      | -5.02975500 | 0.17828000  | -4.35152100 | C | 1.06660400  | -3.53971500 | 1.55421600  |
| H                      | -3.75143800 | 1.61531700  | -2.74949500 | C | 3.38233800  | -0.66829300 | -0.44648600 |
| H                      | -2.73705800 | 0.61827600  | -0.73125400 |   |             |             |             |

|                          |             |             |             |   |             |             |             |
|--------------------------|-------------|-------------|-------------|---|-------------|-------------|-------------|
| C                        | 4.62346800  | -1.26105300 | -0.15042500 | C | 4.81000100  | -2.13167000 | -0.71392500 |
| C                        | 3.31367900  | 0.30539500  | -1.45513500 | C | 3.99793500  | -1.10267200 | -0.22927700 |
| C                        | 4.46583000  | 0.70205800  | -2.14092200 | H | 3.95790000  | 0.89311800  | -2.98212400 |
| C                        | 5.69710800  | 0.11849200  | -1.83130200 | H | 5.39779900  | -0.91099900 | -3.83767700 |
| C                        | 5.77241500  | -0.86784200 | -0.83983600 | H | 5.95109600  | -2.87938700 | -2.39862100 |
| H                        | 1.14233400  | -0.77880600 | 2.68413200  | H | 5.04996900  | -2.97938400 | -0.06671400 |
| H                        | 2.96722200  | 1.36802400  | 1.49869000  | H | 3.61766800  | -1.15904400 | 0.79030600  |
| H                        | 2.72176200  | 1.26828900  | 3.23152400  | C | 2.81600800  | 1.13568800  | -0.44367200 |
| H                        | 1.28821700  | 2.94713300  | 2.45166500  | C | 1.71830900  | 0.50341800  | 0.52309200  |
| H                        | -2.61176500 | 1.56740200  | 1.09011200  | O | 1.95716200  | 0.55363200  | 1.73151500  |
| H                        | -4.54787800 | 3.06501800  | 1.47141500  | H | 0.67416700  | -1.17707800 | -1.28263700 |
| H                        | -4.24472000 | 5.54491300  | 1.37971800  | C | 2.02336700  | 1.94432300  | -1.49736300 |
| H                        | -1.98875100 | 6.49830900  | 0.90459300  | H | 2.68590600  | 2.27253000  | -2.31802700 |
| H                        | -0.05551000 | 4.99722100  | 0.51687000  | H | 1.69273400  | 2.86995700  | -1.00713500 |
| H                        | 0.18548900  | 2.59814200  | -2.27166100 | C | 3.75928000  | 2.13597300  | 0.29404100  |
| H                        | 2.73863100  | 3.60528700  | 1.06795100  | H | 3.10609200  | 2.83630000  | 0.84091000  |
| H                        | 4.23286300  | 4.84604400  | -0.44848700 | H | 4.29935700  | 2.72257300  | -0.46913100 |
| H                        | 3.71823200  | 4.99591000  | -2.88505100 | C | 0.79209900  | 1.25002300  | -2.03973700 |
| H                        | 1.67123600  | 3.88451400  | -3.78784300 | C | 0.79467500  | -0.04493400 | -2.57832700 |
| H                        | 2.95087500  | -3.21476200 | -1.27444700 | H | -0.04665200 | 1.90029300  | -2.30736400 |
| H                        | 2.71544000  | -5.67545500 | -1.24388600 | H | -0.05821300 | -0.36109500 | -3.18833400 |
| H                        | 1.41485100  | -6.79253200 | 0.57214700  | H | 1.72674800  | -0.57273700 | -2.78604700 |
| H                        | 0.35412300  | -5.40871300 | 2.35974100  | C | 4.74901100  | 1.55244100  | 1.25656400  |
| H                        | 0.57182500  | -2.94849100 | 2.32483300  | C | 6.07821000  | 1.62465500  | 1.12660700  |
| H                        | 4.69196200  | -2.04156800 | 0.60847300  | H | 4.31140100  | 1.03897600  | 2.11788300  |
| H                        | 2.34954500  | 0.74875600  | -1.70403300 | H | 6.75259000  | 1.18769500  | 1.87050900  |
| H                        | 4.39554800  | 1.46539500  | -2.91935700 | H | 6.54406900  | 2.12159300  | 0.26715300  |
| H                        | 6.59946700  | 0.42435600  | -2.36686900 | P | -1.20892100 | 1.54051700  | 0.45356400  |
| H                        | 6.73201700  | -1.33464200 | -0.60369400 | C | -1.67740000 | 1.26168700  | 2.24228400  |
| C                        | -0.06732000 | 1.49107000  | 3.25649200  | C | -2.38759900 | -0.09161900 | 2.42611800  |
| H                        | -0.84611500 | 2.25672400  | 3.38172500  | C | -1.52505200 | -1.36441500 | 2.34642400  |
| H                        | -0.55652400 | 0.54605400  | 2.97844300  | P | -0.91931200 | -1.70420900 | 0.61756500  |
| H                        | 0.42406900  | 1.35079300  | 4.23354000  | C | 0.01534400  | -3.28007000 | 0.84805000  |
| C                        | 3.25007800  | -1.17056000 | 2.92757900  | C | 1.35479100  | -3.36918000 | 0.45271100  |
| H                        | 4.22003400  | -0.81631500 | 2.54726800  | C | 2.07313500  | -4.55546700 | 0.63751600  |
| H                        | 3.20579300  | -0.92307200 | 4.00108200  | C | 1.45432000  | -5.66436700 | 1.22026100  |
| H                        | 3.22247700  | -2.26551000 | 2.83393700  | C | 0.11218900  | -5.58494100 | 1.61406600  |
| Co                       | -0.20040900 | -0.15347400 | -0.46176400 | C | -0.60409800 | -4.40103900 | 1.42745600  |
|                          |             |             |             | C | -2.39290600 | -2.33772100 | -0.29807200 |
|                          |             |             |             | C | -2.20820200 | -2.64806100 | -1.65842100 |
|                          |             |             |             | C | -3.67359400 | -2.47681000 | 0.25661100  |
|                          |             |             |             | C | -4.74846900 | -2.89795400 | -0.53551900 |
|                          |             |             |             | C | -4.55591600 | -3.19861800 | -1.88573900 |
|                          |             |             |             | C | -3.27654600 | -3.08082200 | -2.44402300 |
| <b>TS2''<sub>D</sub></b> |             |             |             |   |             |             |             |
| C                        | 3.65760700  | 0.00336800  | -1.02951000 |   |             |             |             |
| C                        | 4.18589700  | 0.04834600  | -2.33041000 |   |             |             |             |
| C                        | 5.00416700  | -0.97541200 | -2.81958600 |   |             |             |             |
| C                        | 5.31631800  | -2.07614300 | -2.01580400 |   |             |             |             |

|   |             |             |             |                          |             |             |             |
|---|-------------|-------------|-------------|--------------------------|-------------|-------------|-------------|
| C | -0.48636900 | 3.22845500  | 0.46590600  | Co                       | 0.04674100  | -0.05073200 | -0.43615900 |
| C | -0.74241400 | 4.13714000  | -0.57422000 |                          |             |             |             |
| C | -0.08572100 | 5.37041600  | -0.62014500 | <b>TS2''<sub>Q</sub></b> |             |             |             |
| C | 0.83368200  | 5.71604700  | 0.37490400  | C                        | -3.76855500 | -0.21519400 | -1.04463700 |
| C | 1.09454000  | 4.81755300  | 1.41453600  | C                        | -4.32293600 | -0.35260900 | -2.32697600 |
| C | 0.44602800  | 3.58104800  | 1.45727800  | C                        | -4.98013300 | 0.71267600  | -2.95130000 |
| C | -2.80089300 | 1.75143400  | -0.44979000 | C                        | -5.09959200 | 1.94629600  | -2.30368800 |
| C | -3.72806200 | 2.77811800  | -0.19477000 | C                        | -4.56619200 | 2.09643400  | -1.02038900 |
| C | -3.09052000 | 0.81182000  | -1.45166500 | C                        | -3.91376000 | 1.02615600  | -0.40131300 |
| C | -4.29230200 | 0.86861100  | -2.16327400 | H                        | -4.24299300 | -1.30332900 | -2.85634400 |
| C | -5.21637500 | 1.87994500  | -1.88764600 | H                        | -5.39955800 | 0.57621800  | -3.95177600 |
| C | -4.92791700 | 2.83801300  | -0.90786900 | H                        | -5.60911100 | 2.78073700  | -2.79232300 |
| H | -0.69846800 | 1.21612700  | 2.74308500  | H                        | -4.66008100 | 3.04948800  | -0.49412100 |
| H | -3.23487600 | -0.15229200 | 1.72439800  | H                        | -3.51331800 | 1.15792400  | 0.60500000  |
| H | -2.83653500 | -0.08430500 | 3.43430500  | C                        | -3.10409300 | -1.37368800 | -0.30778300 |
| H | -2.17073100 | -2.21088600 | 2.62919700  | C                        | -1.94269900 | -0.81650700 | 0.58257500  |
| H | 1.83081400  | -2.50248600 | -0.00593300 | O                        | -1.99244200 | -1.02335100 | 1.79699700  |
| H | 3.11779300  | -4.60930100 | 0.32121100  | H                        | -0.45371500 | 0.57667400  | -1.88088800 |
| H | 2.01295200  | -6.59257800 | 1.36544400  | C                        | -2.39834300 | -2.38408200 | -1.24930800 |
| H | -0.37830100 | -6.45135700 | 2.06529000  | H                        | -3.13458300 | -2.75200500 | -1.99048700 |
| H | -1.65305200 | -4.35228100 | 1.73048100  | H                        | -2.15248700 | -3.26365600 | -0.63442100 |
| H | -1.21714200 | -2.53588300 | -2.10529500 | C                        | -4.17457800 | -2.14710900 | 0.51633700  |
| H | -3.85181900 | -2.25805100 | 1.30962400  | H                        | -3.62578500 | -2.89146400 | 1.11814400  |
| H | -5.74179300 | -2.99210700 | -0.08920000 | H                        | -4.82356900 | -2.69600000 | -0.18637200 |
| H | -5.39715000 | -3.52464600 | -2.50240200 | C                        | -1.11852300 | -1.91501600 | -1.90128200 |
| H | -3.11375300 | -3.31880000 | -3.49831300 | C                        | -0.93129700 | -0.73694800 | -2.63324900 |
| H | -1.45409600 | 3.88086200  | -1.36064800 | H                        | -0.27696500 | -2.60767500 | -1.85033400 |
| H | -0.29463000 | 6.06330500  | -1.43924700 | H                        | -0.06253900 | -0.69244000 | -3.29903600 |
| H | 1.34606800  | 6.68066000  | 0.33984700  | H                        | -1.79845500 | -0.19179600 | -3.01745100 |
| H | 1.81582200  | 5.07511000  | 2.19413000  | C                        | -5.01754900 | -1.31800900 | 1.43751200  |
| H | 0.69113900  | 2.87881800  | 2.25429500  | C                        | -6.33665500 | -1.13401000 | 1.31716700  |
| H | -3.50896500 | 3.54536400  | 0.54826800  | H                        | -4.47639700 | -0.83492800 | 2.25790900  |
| H | -2.36272900 | 0.02859100  | -1.66823800 | H                        | -6.89760500 | -0.51580900 | 2.02573700  |
| H | -4.50207200 | 0.12180100  | -2.93281400 | H                        | -6.90627400 | -1.59318400 | 0.50051300  |
| H | -6.15781400 | 1.92962100  | -2.44070400 | P                        | 1.34617100  | -1.55977800 | 0.39767300  |
| H | -5.64120300 | 3.63974500  | -0.70027600 | C                        | 1.73797100  | -1.21067300 | 2.20437000  |
| C | -0.33139400 | -1.32240100 | 3.30859500  | C                        | 2.35013100  | 0.18769100  | 2.41951700  |
| H | 0.11059300  | -2.32136200 | 3.43629900  | C                        | 1.42913900  | 1.42390100  | 2.37112100  |
| H | 0.45966600  | -0.64600600 | 2.94731900  | P                        | 0.83436700  | 1.83317000  | 0.65520800  |
| H | -0.66460700 | -0.97567200 | 4.30134100  | C                        | -0.09409700 | 3.40243200  | 0.87802500  |
| C | -2.50269900 | 2.37974600  | 2.88118300  | C                        | -1.39977300 | 3.49037400  | 0.37749500  |
| H | -3.53918300 | 2.37144000  | 2.51244500  | C                        | -2.13263400 | 4.67387400  | 0.51930900  |
| H | -2.54090000 | 2.22902900  | 3.97276200  | C                        | -1.56306000 | 5.77494600  | 1.16410000  |
| H | -2.07824000 | 3.37658700  | 2.69498400  | C                        | -0.25596400 | 5.69446200  | 1.66217800  |

|   |             |             |             |                        |             |             |             |
|---|-------------|-------------|-------------|------------------------|-------------|-------------|-------------|
| C | 0.47791400  | 4.51599500  | 1.51601300  | H                      | -0.31802900 | 2.24084400  | 3.40431800  |
| C | 2.30156500  | 2.42973600  | -0.27457000 | H                      | -0.50612600 | 0.53948900  | 2.91389200  |
| C | 2.10545800  | 2.73853600  | -1.63395400 | H                      | 0.53966200  | 0.96394100  | 4.29724300  |
| C | 3.58511800  | 2.57235000  | 0.27379400  | C                      | 2.60983700  | -2.26325400 | 2.89512600  |
| C | 4.65347500  | 2.99289900  | -0.52599600 | H                      | 3.66380000  | -2.16959300 | 2.59424500  |
| C | 4.45098000  | 3.29047800  | -1.87593200 | H                      | 2.56733600  | -2.11442100 | 3.98677300  |
| C | 3.16910000  | 3.17090300  | -2.42619500 | H                      | 2.28067800  | -3.28974500 | 2.68268500  |
| C | 0.89799000  | -3.33919000 | 0.41972900  | Co                     | -0.33992700 | -0.02792400 | -0.33949500 |
| C | 1.44826000  | -4.26728100 | -0.47795300 |                        |             |             |             |
| C | 1.00469600  | -5.59391900 | -0.48974900 | <b>3''<sub>D</sub></b> |             |             |             |
| C | 0.00802200  | -6.01262800 | 0.39617500  | C                      | 3.37569300  | -1.31216900 | 1.01773000  |
| C | -0.54902800 | -5.09261000 | 1.29140400  | C                      | 3.92682600  | -1.56056000 | 2.28537400  |
| C | -0.11465900 | -3.76555900 | 1.29968800  | C                      | 4.96752300  | -0.77482100 | 2.78845500  |
| C | 2.92938900  | -1.46696100 | -0.52144900 | C                      | 5.48774800  | 0.27846800  | 2.02817000  |
| C | 4.08676000  | -2.19895200 | -0.19886500 | C                      | 4.95501000  | 0.53351700  | 0.76200200  |
| C | 2.96653800  | -0.58217500 | -1.61118700 | C                      | 3.91068200  | -0.25294500 | 0.26643600  |
| C | 4.14042800  | -0.40589500 | -2.34897900 | H                      | 3.53954700  | -2.38015900 | 2.89257600  |
| C | 5.29163300  | -1.11979000 | -2.00625600 | H                      | 5.37580100  | -0.98844300 | 3.78006000  |
| C | 5.26042800  | -2.02079400 | -0.93481500 | H                      | 6.30286100  | 0.89278600  | 2.41933100  |
| H | 0.73516700  | -1.23654100 | 2.65885600  | H                      | 5.34971500  | 1.35076900  | 0.15454300  |
| H | 3.20476600  | 0.31377800  | 1.73770500  | H                      | 3.50736700  | -0.03968000 | -0.72496900 |
| H | 2.78317100  | 0.18375000  | 3.43427400  | C                      | 2.31855700  | -2.22615400 | 0.40901900  |
| H | 2.03093000  | 2.28061700  | 2.71523400  | C                      | 1.39334800  | -1.41230700 | -0.55293900 |
| H | -1.83882500 | 2.62864500  | -0.12754600 | O                      | 1.38302600  | -1.69303600 | -1.74902400 |
| H | -3.14905800 | 4.73330300  | 0.12295300  | H                      | 1.47546300  | -0.12607700 | 2.79041000  |
| H | -2.13423000 | 6.69997000  | 1.27655500  | C                      | 1.27758900  | -2.75230300 | 1.42267100  |
| H | 0.19340100  | 6.55659800  | 2.16169500  | H                      | 1.77100400  | -3.20369400 | 2.30437700  |
| H | 1.50193100  | 4.46371700  | 1.89466600  | H                      | 0.74674200  | -3.57838300 | 0.92143000  |
| H | 1.11108200  | 2.62606500  | -2.07401100 | C                      | 3.02465200  | -3.42029000 | -0.29660400 |
| H | 3.76791200  | 2.36153600  | 1.32760000  | H                      | 2.23380300  | -3.99612500 | -0.80755500 |
| H | 5.64929600  | 3.09088200  | -0.08632800 | H                      | 3.46025700  | -4.07106600 | 0.47988100  |
| H | 5.28805100  | 3.61582200  | -2.49853300 | C                      | 0.25841800  | -1.67050100 | 1.78068700  |
| H | 3.00043200  | 3.40500500  | -3.48035900 | C                      | 0.61824300  | -0.79348100 | 2.98413000  |
| H | 2.22419600  | -3.95697300 | -1.17956200 | H                      | -0.71080300 | -2.15726700 | 1.98771900  |
| H | 1.44354800  | -6.30266200 | -1.19675300 | H                      | -0.23097400 | -0.15153600 | 3.27701300  |
| H | -0.33606100 | -7.04981100 | 0.38757800  | H                      | 0.88806400  | -1.39053400 | 3.88039800  |
| H | -1.33472200 | -5.40678500 | 1.98330400  | C                      | 4.07852900  | -3.05465000 | -1.29758300 |
| H | -0.58171900 | -3.05369500 | 1.98188400  | C                      | 5.37716900  | -3.35584300 | -1.19289300 |
| H | 4.07181200  | -2.92088400 | 0.61777400  | H                      | 3.71994100  | -2.49089400 | -2.16508500 |
| H | 2.06463100  | -0.02641700 | -1.87222700 | H                      | 6.09919800  | -3.05985300 | -1.96094300 |
| H | 4.15292100  | 0.29266600  | -3.18832400 | H                      | 5.76875700  | -3.90788300 | -0.33021400 |
| H | 6.21326500  | -0.98131900 | -2.57719600 | P                      | -1.95493000 | -0.81498100 | -0.46242400 |
| H | 6.15551300  | -2.59068300 | -0.67281000 | C                      | -2.26083000 | -0.38376800 | -2.25909900 |
| C | 0.21232300  | 1.28338200  | 3.29382700  | C                      | -1.99824900 | 1.09741900  | -2.59905800 |

|   |             |             |             |                  |             |             |             |
|---|-------------|-------------|-------------|------------------|-------------|-------------|-------------|
| C | -0.54438500 | 1.60934400  | -2.56109700 | H                | -0.49902800 | -3.05445000 | -1.51781100 |
| P | 0.14122200  | 1.63055100  | -0.82847500 | H                | -4.26511100 | 1.16205300  | -0.91255600 |
| C | 1.62241900  | 2.73008100  | -0.89900600 | H                | -2.52845900 | -1.12933200 | 2.31695100  |
| C | 2.39698300  | 2.80287500  | 0.27090700  | H                | -4.11873800 | -0.09409800 | 3.89798400  |
| C | 3.49365100  | 3.66307500  | 0.34849600  | H                | -5.77659000 | 1.59416400  | 3.08878300  |
| C | 3.84607800  | 4.44941100  | -0.75374000 | H                | -5.82230400 | 2.20810200  | 0.66878400  |
| C | 3.08789000  | 4.37652800  | -1.92621400 | C                | 0.38227100  | 0.82108900  | -3.49216400 |
| C | 1.97765800  | 3.52819000  | -1.99774400 | H                | 1.36493700  | 1.30587600  | -3.59036300 |
| C | -1.00211400 | 2.75069800  | 0.09269800  | H                | 0.55965100  | -0.19525600 | -3.11417700 |
| C | -1.27970000 | 2.43716700  | 1.43244000  | H                | -0.06301600 | 0.76155400  | -4.49949600 |
| C | -1.58073300 | 3.89677200  | -0.47417200 | C                | -3.60442900 | -0.86158700 | -2.81718800 |
| C | -2.43404200 | 4.70402500  | 0.28296100  | H                | -4.45429000 | -0.30444800 | -2.39706900 |
| C | -2.70547400 | 4.38359000  | 1.61817500  | H                | -3.62374300 | -0.71879600 | -3.91046300 |
| C | -2.12118800 | 3.25164400  | 2.19427700  | H                | -3.76954800 | -1.92992300 | -2.61673800 |
| C | -2.33821800 | -2.61586100 | -0.45978000 | Co               | 0.14617700  | -0.31377000 | 0.33559400  |
| C | -3.49366000 | -3.17073400 | 0.11091900  |                  |             |             |             |
| C | -3.70898900 | -4.55260800 | 0.07506700  | 3'' <sub>Q</sub> |             |             |             |
| C | -2.77844300 | -5.39597600 | -0.53901700 | C                | -3.94528500 | -0.28926200 | -0.80165000 |
| C | -1.62787100 | -4.84937300 | -1.11836300 | C                | -4.71455800 | -0.28066100 | -1.97856300 |
| C | -1.40500700 | -3.47108500 | -1.07458500 | C                | -5.71054600 | 0.67530300  | -2.18820200 |
| C | -3.28278700 | -0.08038200 | 0.57503700  | C                | -5.96506400 | 1.65429300  | -1.22076000 |
| C | -4.21933800 | 0.86813800  | 0.13412600  | C                | -5.22281500 | 1.64867900  | -0.03785600 |
| C | -3.25859200 | -0.40722100 | 1.94604500  | C                | -4.23099500 | 0.68302500  | 0.17053000  |
| C | -4.15364600 | 0.17970100  | 2.84047100  | H                | -4.53322700 | -1.03282500 | -2.74827900 |
| C | -5.08209600 | 1.12437200  | 2.38804100  | H                | -6.29145800 | 0.65673100  | -3.11437300 |
| C | -5.10743800 | 1.46668600  | 1.03436100  | H                | -6.74028500 | 2.40698300  | -1.38536300 |
| H | -1.47077400 | -0.98278300 | -2.74096000 | H                | -5.41624400 | 2.39620000  | 0.73590100  |
| H | -2.62963200 | 1.74972000  | -1.97977200 | H                | -3.67710500 | 0.69036400  | 1.10862800  |
| H | -2.34607400 | 1.24647700  | -3.63575700 | C                | -2.89192100 | -1.37703100 | -0.57768600 |
| H | -0.58597600 | 2.65569200  | -2.90273900 | C                | -1.93207700 | -0.94092600 | 0.57847400  |
| H | 2.13520400  | 2.17915200  | 1.12943900  | O                | -2.19570900 | -1.23837400 | 1.74106200  |
| H | 4.08265700  | 3.70893100  | 1.26756700  | H                | -2.23136800 | 1.35920000  | -2.04071700 |
| H | 4.71008700  | 5.11644600  | -0.69908900 | C                | -1.97495200 | -1.57978300 | -1.82285100 |
| H | 3.35629600  | 4.98828300  | -2.79141100 | H                | -2.61273100 | -1.79296200 | -2.70473000 |
| H | 1.38982700  | 3.50536500  | -2.91623000 | H                | -1.40965200 | -2.51132400 | -1.64148700 |
| H | -0.83686400 | 1.54451400  | 1.88127000  | C                | -3.60758800 | -2.72551000 | -0.25818500 |
| H | -1.36583200 | 4.16657500  | -1.51065700 | H                | -2.82564600 | -3.43658600 | 0.06325400  |
| H | -2.88644600 | 5.58996900  | -0.17006700 | H                | -4.03631200 | -3.11919300 | -1.19518700 |
| H | -3.37354100 | 5.01610100  | 2.20810500  | C                | -0.97026000 | -0.44970800 | -2.09527100 |
| H | -2.33160300 | 2.99259200  | 3.23437600  | C                | -1.55570600 | 0.81477600  | -2.71924200 |
| H | -4.23540100 | -2.52585300 | 0.58436500  | H                | -0.18619200 | -0.84153600 | -2.76913100 |
| H | -4.61291000 | -4.96984700 | 0.52656900  | H                | -0.75520200 | 1.52126800  | -3.00135500 |
| H | -2.94904900 | -6.47515600 | -0.56666100 | H                | -2.14636400 | 0.61302700  | -3.63994300 |
| H | -0.89409600 | -5.50009500 | -1.60120900 | C                | -4.67801500 | -2.65784300 | 0.78999900  |

|   |             |             |             |                          |             |             |             |
|---|-------------|-------------|-------------|--------------------------|-------------|-------------|-------------|
| C | -5.97706300 | -2.88780600 | 0.57076500  | H                        | 5.24662600  | 3.92592200  | 0.18737100  |
| H | -4.33389800 | -2.37717000 | 1.79021900  | H                        | 5.34914600  | 3.48454900  | -2.26513500 |
| H | -6.71624400 | -2.81892900 | 1.37564500  | H                        | 3.45525700  | 2.31596400  | -3.39569400 |
| H | -6.35148900 | -3.15127500 | -0.42553700 | H                        | 3.12334100  | -3.80608000 | -0.52995000 |
| P | 1.57132300  | -1.41341600 | 0.48294000  | H                        | 2.65400200  | -6.23486300 | -0.41805500 |
| C | 2.06803300  | -1.05820700 | 2.25638300  | H                        | 0.58609600  | -7.06577500 | 0.70452300  |
| C | 2.37440300  | 0.42354500  | 2.55603500  | H                        | -1.01302700 | -5.43471300 | 1.71631300  |
| C | 1.24304600  | 1.46285400  | 2.43359000  | H                        | -0.55907800 | -3.00210900 | 1.58344400  |
| P | 0.72424200  | 1.78944300  | 0.67035700  | H                        | 4.44939300  | -0.38228200 | 0.78372700  |
| C | -0.31385400 | 3.29868400  | 0.80100800  | H                        | 1.82962400  | -1.89184200 | -2.30800500 |
| C | -1.66699500 | 3.19080800  | 0.44791500  | H                        | 3.60488400  | -1.51157900 | -3.98804200 |
| C | -2.51250600 | 4.30097800  | 0.53370800  | H                        | 5.80219300  | -0.54317000 | -3.29467800 |
| C | -2.00871800 | 5.52842400  | 0.97382300  | H                        | 6.19731600  | 0.02012800  | -0.89531400 |
| C | -0.65811100 | 5.64348400  | 1.32668200  | C                        | 0.00035000  | 1.09944600  | 3.25352300  |
| C | 0.18753400  | 4.53501800  | 1.24002600  | H                        | -0.71692400 | 1.93416400  | 3.27777800  |
| C | 2.23156300  | 2.36400100  | -0.20224800 | H                        | -0.52786200 | 0.22310000  | 2.84634200  |
| C | 2.30121800  | 2.11223600  | -1.58311200 | H                        | 0.29043100  | 0.87651200  | 4.29373600  |
| C | 3.30087000  | 3.02077600  | 0.42732700  | C                        | 3.17011800  | -1.97354200 | 2.79813100  |
| C | 4.41707000  | 3.42053500  | -0.31352200 | H                        | 4.14547300  | -1.77868800 | 2.32903000  |
| C | 4.47362400  | 3.17466400  | -1.68915300 | H                        | 3.28597300  | -1.81064100 | 3.88241200  |
| C | 3.41187400  | 2.52179400  | -2.32368100 | H                        | 2.92701500  | -3.03434700 | 2.64310600  |
| C | 1.31397500  | -3.23331800 | 0.51703500  | Co                       | -0.26884300 | -0.12603200 | -0.21227800 |
| C | 2.21179900  | -4.15541600 | -0.04241300 |                          |             |             |             |
| C | 1.94752400  | -5.52721100 | 0.02343100  |                          |             |             |             |
| C | 0.79014200  | -5.99327600 | 0.65446300  | <b>TS3''<sub>b</sub></b> |             |             |             |
| C | -0.10559300 | -5.07973900 | 1.22106100  | C                        | -3.42460400 | -1.53601200 | -0.58610000 |
| C | 0.15003000  | -3.70823300 | 1.14845100  | C                        | -4.42706800 | -1.28931700 | -1.53792400 |
| C | 3.00964200  | -1.18390000 | -0.63131300 | C                        | -5.59513200 | -0.60171500 | -1.19150000 |
| C | 4.24773700  | -0.64165000 | -0.25353800 | C                        | -5.78047500 | -0.14345700 | 0.11654700  |
| C | 2.79238500  | -1.48420300 | -1.99058600 | C                        | -4.78634600 | -0.37606900 | 1.07235300  |
| C | 3.79162400  | -1.26688000 | -2.93940900 | C                        | -3.62459700 | -1.06764300 | 0.72222600  |
| C | 5.02252400  | -0.72568900 | -2.55115100 | H                        | -4.29980400 | -1.64861500 | -2.56232600 |
| C | 5.24374300  | -0.41175200 | -1.20843500 | H                        | -6.36288200 | -0.42059800 | -1.94878100 |
| H | 1.13327500  | -1.32173900 | 2.77915500  | H                        | -6.68839300 | 0.40170800  | 0.38621300  |
| H | 3.24174100  | 0.75497500  | 1.96858500  | H                        | -4.91459700 | -0.01315500 | 2.09555100  |
| H | 2.70349300  | 0.45601600  | 3.60904000  | H                        | -2.85373300 | -1.25255700 | 1.46739100  |
| H | 1.64795400  | 2.41265900  | 2.81955600  | C                        | -2.21298300 | -2.36826800 | -0.91748800 |
| H | -2.05527800 | 2.22920200  | 0.10747300  | C                        | -0.79896000 | -1.93111200 | -0.37195300 |
| H | -3.56391900 | 4.20322100  | 0.25299500  | O                        | -0.33955900 | -2.37213300 | 0.73065900  |
| H | -2.66652500 | 6.39877700  | 1.03994800  | H                        | 0.65617300  | -1.89087400 | -3.83013800 |
| H | -0.26221100 | 6.60313600  | 1.66877000  | C                        | -1.66046100 | -2.30028000 | -2.35579000 |
| H | 1.24127900  | 4.63575400  | 1.51003400  | H                        | -1.90703700 | -1.34476200 | -2.84435400 |
| H | 1.48293300  | 1.57954100  | -2.07363800 | H                        | -1.95343200 | -3.12285400 | -3.02668200 |
| H | 3.27251200  | 3.22101800  | 1.49997700  | C                        | -2.49942300 | -3.85752900 | -0.54855700 |
|   |             |             |             | H                        | -1.60584400 | -4.44232100 | -0.82997900 |

|   |             |             |             |              |             |             |             |
|---|-------------|-------------|-------------|--------------|-------------|-------------|-------------|
| H | -3.33372600 | -4.21379200 | -1.17732900 | H            | -2.49197500 | 1.47891900  | -1.68696300 |
| C | -0.19636000 | -2.29719000 | -1.88724600 | H            | -4.73066000 | 2.51129000  | -1.99743900 |
| C | 0.77239400  | -1.52167500 | -2.79494900 | H            | -5.77457300 | 3.81242300  | -0.14051200 |
| H | 0.20195300  | -3.31737100 | -1.76875200 | H            | -4.55348900 | 4.08380700  | 2.01832000  |
| H | 0.54532500  | -0.43382800 | -2.85984400 | H            | -2.30086100 | 3.10434300  | 2.30861800  |
| H | 1.82685700  | -1.64868000 | -2.51896500 | H            | -0.03124800 | 2.68697300  | -2.16998000 |
| C | -2.80392800 | -4.12009300 | 0.89519600  | H            | 0.89027600  | 3.83984100  | 1.88915300  |
| C | -3.94584600 | -4.64184900 | 1.35580400  | H            | 2.03567900  | 5.85835000  | 1.05626800  |
| H | -2.00341900 | -3.83911900 | 1.58637700  | H            | 2.14056400  | 6.33329400  | -1.39068400 |
| H | -4.10778300 | -4.81648100 | 2.42464300  | H            | 1.07810400  | 4.74776300  | -3.00400700 |
| H | -4.76597900 | -4.91210500 | 0.67977200  | H            | 4.10546400  | -1.68741500 | -1.51591800 |
| P | 2.09121800  | -0.60999500 | 0.34139500  | H            | 5.00653200  | -3.95110600 | -1.91686000 |
| C | 1.85905600  | -0.38352400 | 2.18383200  | H            | 4.30073900  | -5.86145100 | -0.46682900 |
| C | 1.33382500  | 1.03272400  | 2.49780800  | H            | 2.66281100  | -5.46594800 | 1.37620700  |
| C | -0.15096300 | 1.35090200  | 2.21764800  | H            | 1.71867400  | -3.20838700 | 1.74247200  |
| P | -0.51746800 | 1.54525900  | 0.39932700  | H            | 5.05227300  | -0.53385900 | 1.06227400  |
| C | -2.23999600 | 2.21898900  | 0.32792000  | H            | 2.26248000  | 1.69761600  | -1.34412800 |
| C | -2.93928800 | 2.06356800  | -0.87903400 | H            | 4.05412500  | 3.30637800  | -1.94735500 |
| C | -4.19846400 | 2.64220700  | -1.05241600 | H            | 6.35878500  | 3.00229700  | -1.02367100 |
| C | -4.78406000 | 3.36903000  | -0.01121000 | H            | 6.84212200  | 1.06856100  | 0.47660900  |
| C | -4.10026200 | 3.51862100  | 1.19968500  | C            | -1.08226600 | 0.30773400  | 2.84145300  |
| C | -2.83106100 | 2.95575900  | 1.36577500  | H            | -2.13366500 | 0.62375700  | 2.79465200  |
| C | 0.34695000  | 3.11394000  | -0.08417900 | H            | -0.98940000 | -0.65952600 | 2.32717600  |
| C | 0.40901800  | 3.39382700  | -1.46102400 | H            | -0.82173100 | 0.16432700  | 3.90368500  |
| C | 0.93055600  | 4.01865600  | 0.81387900  | C            | 3.08185500  | -0.68449700 | 3.05205100  |
| C | 1.57661300  | 5.16814600  | 0.34367200  | H            | 3.83808000  | 0.11081200  | 2.97013100  |
| C | 1.63408500  | 5.43598000  | -1.02656400 | H            | 2.77784200  | -0.73949400 | 4.11094300  |
| C | 1.03939100  | 4.54708500  | -1.93025200 | H            | 3.55982100  | -1.63942300 | 2.79164500  |
| C | 2.85797600  | -2.27420000 | 0.15867900  | Co           | 0.11248700  | -0.17400000 | -0.79872000 |
| C | 3.77904300  | -2.51103100 | -0.87783200 |              |             |             |             |
| C | 4.29227700  | -3.79150700 | -1.10478900 |              |             |             |             |
| C | 3.89737300  | -4.86029500 | -0.29464600 | <b>TS3"Q</b> |             |             |             |
| C | 2.98015100  | -4.63681900 | 0.73798100  | C            | -3.71855800 | -1.03679200 | -0.60465900 |
| C | 2.45797100  | -3.35950700 | 0.95862600  | C            | -4.60925000 | -0.56822900 | -1.58390100 |
| C | 3.51322000  | 0.49325600  | -0.07227100 | C            | -5.58416900 | 0.38591200  | -1.27421000 |
| C | 4.81889500  | 0.31809300  | 0.42294100  | C            | -5.68469000 | 0.89271100  | 0.02515700  |
| C | 3.26402700  | 1.56847600  | -0.93718600 | C            | -4.80450700 | 0.43392400  | 1.01037700  |
| C | 4.27599100  | 2.47170900  | -1.27791600 | C            | -3.83613700 | -0.52389200 | 0.69710400  |
| C | 5.56284800  | 2.30032300  | -0.76197500 | H            | -4.54344300 | -0.95739100 | -2.60316200 |
| C | 5.83313300  | 1.21613300  | 0.08270900  | H            | -6.26455800 | 0.73963800  | -2.05366200 |
| H | 1.07258000  | -1.11897600 | 2.40173300  | H            | -6.43756100 | 1.64702200  | 0.26621900  |
| H | 1.98622200  | 1.77664900  | 2.01280500  | H            | -4.87048500 | 0.82537000  | 2.02900400  |
| H | 1.47064800  | 1.18579500  | 3.58207500  | H            | -3.15595100 | -0.88211200 | 1.46945900  |
| H | -0.35145400 | 2.32449300  | 2.69224100  | C            | -2.70169800 | -2.11353700 | -0.92569500 |
|   |             |             |             | C            | -1.39270800 | -2.02431000 | -0.06977000 |

|   |             |             |             |                        |             |             |             |
|---|-------------|-------------|-------------|------------------------|-------------|-------------|-------------|
| O | -1.20029800 | -2.76519500 | 0.92746800  | C                      | 4.56970100  | 0.67961700  | -2.39719500 |
| H | 0.45664700  | -2.26393800 | -3.78995600 | C                      | 5.32102300  | 1.65050400  | -1.72605800 |
| C | -1.99122400 | -1.97978200 | -2.28991400 | C                      | 5.09275600  | 1.87438500  | -0.36690000 |
| H | -1.98840000 | -0.92741700 | -2.62100100 | H                      | 1.19779100  | -1.16252600 | 2.59701200  |
| H | -2.44866600 | -2.57653700 | -3.10070900 | H                      | 2.23514100  | 1.70360000  | 2.22248500  |
| C | -3.37657200 | -3.51420800 | -0.81218300 | H                      | 1.61701700  | 1.04619500  | 3.72398500  |
| H | -2.60135700 | -4.27033700 | -1.02703000 | H                      | -0.04324100 | 2.38341800  | 2.75789000  |
| H | -4.14098800 | -3.59136700 | -1.60398300 | H                      | -2.01655100 | 1.95268200  | -1.72436900 |
| C | -0.58480200 | -2.39127000 | -1.87639200 | H                      | -4.05868600 | 3.31608000  | -2.09837400 |
| C | 0.56319600  | -1.90918500 | -2.74239600 | H                      | -4.98207500 | 4.71709100  | -0.25054800 |
| H | -0.51151900 | -3.47905900 | -1.72252000 | H                      | -3.84530800 | 4.74210200  | 1.96999000  |
| H | 0.62108400  | -0.80560000 | -2.80106700 | H                      | -1.79348400 | 3.41518600  | 2.33642500  |
| H | 1.53363400  | -2.27700500 | -2.37682500 | H                      | 1.28430800  | 1.97368900  | -1.98614600 |
| C | -3.99808900 | -3.81434000 | 0.51898400  | H                      | 0.99180100  | 4.08759000  | 1.76799800  |
| C | -5.30597400 | -3.99846700 | 0.72921800  | H                      | 2.62340800  | 5.76186300  | 0.95168700  |
| H | -3.29380700 | -3.85472300 | 1.35559800  | H                      | 3.56811300  | 5.57761400  | -1.34946400 |
| H | -5.70334200 | -4.20948600 | 1.72754800  | H                      | 2.88049100  | 3.68600700  | -2.82532000 |
| H | -6.03153500 | -3.94036600 | -0.09098600 | H                      | 4.77494400  | -2.00324300 | -0.01493800 |
| P | 2.01592400  | -0.83624400 | 0.43001500  | H                      | 5.58423000  | -4.34300200 | -0.06646400 |
| C | 1.98803500  | -0.46604300 | 2.27188700  | H                      | 3.99615700  | -6.22969100 | 0.31884900  |
| C | 1.52975100  | 0.96487200  | 2.62669600  | H                      | 1.58641800  | -5.74810000 | 0.75762800  |
| C | 0.08963100  | 1.39770100  | 2.28578900  | H                      | 0.76094900  | -3.39835300 | 0.78816600  |
| P | -0.19197900 | 1.62782500  | 0.45285700  | H                      | 3.97658500  | 1.33609900  | 1.37882700  |
| C | -1.75529700 | 2.59548800  | 0.32558400  | H                      | 3.01825600  | -0.80143800 | -2.25098500 |
| C | -2.41144900 | 2.57513500  | -0.91676100 | H                      | 4.73483200  | 0.49459500  | -3.46165500 |
| C | -3.55908900 | 3.34191200  | -1.12720200 | H                      | 6.07534200  | 2.23199500  | -2.26180500 |
| C | -4.07763000 | 4.12492300  | -0.09082300 | H                      | 5.66752800  | 2.63409700  | 0.16850500  |
| C | -3.44121500 | 4.13739700  | 1.15400300  | C                      | -0.96127200 | 0.44166500  | 2.85936300  |
| C | -2.28269300 | 3.38188500  | 1.36126100  | H                      | -1.97954700 | 0.83044500  | 2.71739600  |
| C | 1.02470200  | 2.91484700  | -0.05912500 | H                      | -0.91334900 | -0.55138300 | 2.38809400  |
| C | 1.56460900  | 2.81663300  | -1.35043200 | H                      | -0.79688800 | 0.31571900  | 3.94260300  |
| C | 1.40848800  | 3.98618700  | 0.76345900  | C                      | 3.26335600  | -0.84735200 | 3.03043000  |
| C | 2.32420700  | 4.93558500  | 0.30158900  | H                      | 4.11958100  | -0.20967300 | 2.76675300  |
| C | 2.85239800  | 4.83376100  | -0.99049900 | H                      | 3.09389400  | -0.74090000 | 4.11484200  |
| C | 2.46603400  | 3.77559200  | -1.81860600 | H                      | 3.54985200  | -1.89095900 | 2.83825400  |
| C | 2.71331400  | -2.54202000 | 0.38803300  | Co                     | -0.14987700 | -0.51127200 | -0.38345900 |
| C | 4.06921900  | -2.81927800 | 0.14946400  |                        |             |             |             |
| C | 4.52684500  | -4.14013200 | 0.12314000  | <b>4''<sub>D</sub></b> |             |             |             |
| C | 3.63739600  | -5.19738600 | 0.34155300  | C                      | 3.10868500  | -1.73178400 | 0.50056900  |
| C | 2.28713400  | -4.92605200 | 0.58725500  | C                      | 4.49958000  | -1.55519900 | 0.55076100  |
| C | 1.82139200  | -3.60758900 | 0.60521700  | C                      | 5.25360100  | -1.40671300 | -0.61797700 |
| C | 3.36520500  | 0.15639300  | -0.33932100 | C                      | 4.62655700  | -1.44359500 | -1.86715300 |
| C | 4.12649100  | 1.13318500  | 0.32130000  | C                      | 3.24320800  | -1.64192500 | -1.93386900 |
| C | 3.59924800  | -0.05223400 | -1.71210100 | C                      | 2.49568700  | -1.78650000 | -0.76236900 |



|   |             |             |             |    |             |             |             |
|---|-------------|-------------|-------------|----|-------------|-------------|-------------|
| H | 5.00118800  | -1.51577300 | 1.52106900  | C  | -4.32174500 | -3.95171500 | -0.80808600 |
| H | 6.33422100  | -1.25416100 | -0.55128800 | C  | -3.37587700 | -4.91475600 | -1.17369600 |
| H | 5.21071800  | -1.32177100 | -2.78289000 | C  | -2.04737200 | -4.53472600 | -1.39611400 |
| H | 2.74271800  | -1.68270900 | -2.90375500 | C  | -1.66776700 | -3.19893000 | -1.24557100 |
| H | 1.41683300  | -1.94934800 | -0.83007200 | C  | -3.28751600 | 0.31345700  | 0.32934100  |
| C | 2.29417000  | -1.88355300 | 1.76200400  | C  | -4.08647300 | 1.40456700  | -0.04143300 |
| C | 0.90965200  | -1.15613900 | 1.84058400  | C  | -3.32866400 | -0.13328000 | 1.66597600  |
| O | -0.24732400 | -1.74967600 | 1.55780600  | C  | -4.16961300 | 0.47908600  | 2.59526100  |
| H | 1.34317300  | 1.12905800  | 4.57105200  | C  | -4.97165500 | 1.56180400  | 2.21233700  |
| C | 2.72727000  | -1.02628100 | 2.99008400  | C  | -4.92265600 | 2.02310400  | 0.89514400  |
| H | 3.36257100  | -0.17507800 | 2.70650800  | H  | -1.49670200 | -0.59731400 | -2.98746300 |
| H | 3.22373800  | -1.57616800 | 3.80394300  | H  | -2.02200700 | 2.25699700  | -1.99462300 |
| C | 2.17887400  | -3.38566800 | 2.14465900  | H  | -1.71718600 | 1.84774200  | -3.67654100 |
| H | 1.61626400  | -3.44139600 | 3.09365000  | H  | 0.28617100  | 2.64416000  | -2.79126500 |
| H | 3.19012200  | -3.78410500 | 2.33901700  | H  | 2.76406700  | 0.99424000  | 1.05372800  |
| C | 1.25724600  | -0.60016400 | 3.23792300  | H  | 5.14001000  | 1.72699100  | 1.14435700  |
| C | 0.95375100  | 0.84908200  | 3.57648400  | H  | 6.03674400  | 3.25432100  | -0.61896700 |
| H | 0.79402600  | -1.25547700 | 3.99992800  | H  | 4.53366700  | 4.04197500  | -2.44917800 |
| H | 1.39526800  | 1.53273900  | 2.83412800  | H  | 2.17475400  | 3.33238300  | -2.51926000 |
| H | -0.13458600 | 1.02655900  | 3.58526700  | H  | -1.19271700 | 1.74987900  | 1.63250200  |
| C | 1.47946600  | -4.22754800 | 1.11861500  | H  | 0.40346500  | 4.48036600  | -1.29680300 |
| C | 2.02910700  | -5.25078300 | 0.45598200  | H  | -0.82544300 | 6.35015300  | -0.22791300 |
| H | 0.44577100  | -3.93162900 | 0.91274700  | H  | -2.23599800 | 5.93537200  | 1.78678900  |
| H | 1.46223000  | -5.82460700 | -0.28469200 | H  | -2.41533500 | 3.62593300  | 2.72326200  |
| H | 3.06900900  | -5.55348800 | 0.62773400  | H  | -4.68975900 | -1.86666600 | -0.38315800 |
| P | -2.02245300 | -0.49146600 | -0.72868100 | H  | -5.36041300 | -4.24319000 | -0.63173400 |
| C | -2.14841000 | 0.13170400  | -2.47832600 | H  | -3.67227000 | -5.96125400 | -1.28092900 |
| C | -1.51179200 | 1.52562800  | -2.64082800 | H  | -1.30143000 | -5.28278000 | -1.67631100 |
| C | 0.01445400  | 1.63544500  | -2.44447300 | H  | -0.62520100 | -2.91170800 | -1.39905600 |
| P | 0.54067400  | 1.53433300  | -0.64785000 | H  | -4.05718300 | 1.79621400  | -1.05658600 |
| C | 2.29679200  | 2.11721600  | -0.71894800 | H  | -2.67413500 | -0.95163100 | 1.97812700  |
| C | 3.15368300  | 1.67674600  | 0.29952300  | H  | -4.19112900 | 0.11815300  | 3.62674800  |
| C | 4.48883500  | 2.08629600  | 0.34375500  | H  | -5.62412900 | 2.04809700  | 2.94179300  |
| C | 4.99077100  | 2.93824700  | -0.64384000 | H  | -5.53452000 | 2.87544100  | 0.58917100  |
| C | 4.14780600  | 3.37915400  | -1.67025900 | C  | 0.79154600  | 0.60852000  | -3.27040900 |
| C | 2.81046100  | 2.97435800  | -1.70776600 | H  | 1.87116000  | 0.81293200  | -3.25808300 |
| C | -0.31655600 | 2.98614300  | 0.10120800  | H  | 0.64578400  | -0.41070000 | -2.88331800 |
| C | -1.11145700 | 2.76209200  | 1.23403200  | H  | 0.45421000  | 0.62489400  | -4.32021100 |
| C | -0.21699600 | 4.28667400  | -0.41906400 | C  | -3.52420200 | 0.03392200  | -3.14129800 |
| C | -0.90689400 | 5.34107300  | 0.18439200  | H  | -4.23356100 | 0.78095900  | -2.75881700 |
| C | -1.69855500 | 5.10812600  | 1.31612300  | H  | -3.42334400 | 0.20344000  | -4.22621100 |
| C | -1.79833700 | 3.81691200  | 1.84222700  | H  | -3.97196200 | -0.96088900 | -2.99951000 |
| C | -2.61408900 | -2.22375200 | -0.88694900 | Co | -0.07387900 | -0.31955000 | 0.35327900  |
| C | -3.94438600 | -2.61216500 | -0.66787000 |    |             |             |             |

|     |             |             |             |   |             |             |             |
|-----|-------------|-------------|-------------|---|-------------|-------------|-------------|
| 4"Q |             |             |             | C | 0.02953200  | -3.10337900 | 1.22383200  |
| C   | -1.96599300 | 2.72010100  | 0.63722200  | C | -1.64340600 | -4.22423800 | -0.11961000 |
| C   | -3.33484100 | 2.99832600  | 0.76793700  | C | -1.37632400 | -5.42068700 | 0.55004200  |
| C   | -4.18567800 | 2.97017400  | -0.34264400 | C | -0.40482000 | -5.46142000 | 1.55833100  |
| C   | -3.67871400 | 2.66966600  | -1.61107300 | C | 0.29759300  | -4.30104300 | 1.89447500  |
| C   | -2.31301500 | 2.40672900  | -1.75990000 | C | 3.04639100  | 1.16419700  | -1.20138000 |
| C   | -1.46798300 | 2.43218700  | -0.64548400 | C | 4.42599200  | 1.14449100  | -0.95014200 |
| H   | -3.74406300 | 3.22757100  | 1.75548100  | C | 5.22257500  | 2.24725800  | -1.27818400 |
| H   | -5.25203100 | 3.17469300  | -0.21490500 | C | 4.65083900  | 3.37906100  | -1.86699300 |
| H   | -4.34337600 | 2.63908200  | -2.47805400 | C | 3.27558200  | 3.40414000  | -2.12751000 |
| H   | -1.90273400 | 2.18151700  | -2.74637500 | C | 2.48043200  | 2.30664700  | -1.79122000 |
| H   | -0.39349400 | 2.25855600  | -0.77188900 | C | 2.88993200  | -1.26269900 | 0.36793400  |
| C   | -1.04409400 | 2.72712600  | 1.83262200  | C | 3.25191400  | -2.60041200 | 0.14902800  |
| C   | 0.14424600  | 1.69658700  | 1.83306800  | C | 3.14733200  | -0.68582800 | 1.62927200  |
| O   | 1.35334600  | 1.96745900  | 1.42158600  | C | 3.77911200  | -1.42614100 | 2.62972300  |
| H   | -0.65159100 | -0.41626300 | 4.62976500  | C | 4.14756900  | -2.75771100 | 2.39844000  |
| C   | -1.56730900 | 2.00839000  | 3.11092600  | C | 3.87706700  | -3.34137900 | 1.15862700  |
| H   | -2.40320800 | 1.32708700  | 2.88945800  | H | 1.41799600  | -0.24912300 | -3.06931300 |
| H   | -1.86144300 | 2.66853500  | 3.94108600  | H | 1.00083500  | -2.99475400 | -1.76618000 |
| C   | -0.56595400 | 4.17279900  | 2.13633800  | H | 0.88707300  | -2.70899300 | -3.49483700 |
| H   | 0.07181000  | 4.12781100  | 3.03724900  | H | -1.29849800 | -2.74598100 | -2.69408800 |
| H   | -1.43857500 | 4.80370700  | 2.38242100  | H | -3.00517800 | -0.09293400 | 1.10042700  |
| C   | -0.22646000 | 1.24870000  | 3.27173600  | H | -5.47200700 | 0.15122800  | 1.24841400  |
| C   | -0.27551400 | -0.23342300 | 3.60734000  | H | -6.93684400 | -0.90533000 | -0.47760100 |
| H   | 0.43419500  | 1.77057900  | 3.99261100  | H | -5.91076200 | -2.21975800 | -2.33327600 |
| H   | -0.93374100 | -0.76782200 | 2.90258000  | H | -3.45985000 | -2.49421300 | -2.46212800 |
| H   | 0.72593600  | -0.69037300 | 3.53581200  | H | 0.58040200  | -2.19922400 | 1.48311000  |
| C   | 0.21740000  | 4.78437900  | 1.01279600  | H | -2.40804300 | -4.20195100 | -0.89934500 |
| C   | -0.15015300 | 5.86083700  | 0.30955300  | H | -1.92922900 | -6.32595500 | 0.28611500  |
| H   | 1.13969900  | 4.24947600  | 0.76253100  | H | -0.19847900 | -6.39868000 | 2.08146500  |
| H   | 0.46493500  | 6.24674600  | -0.51026300 | H | 1.05818000  | -4.32335300 | 2.67851400  |
| H   | -1.08180000 | 6.39772400  | 0.52543300  | H | 4.88467400  | 0.26574100  | -0.49272700 |
| P   | 1.91326300  | -0.22690200 | -0.79389900 | H | 6.29600400  | 2.21939200  | -1.07305100 |
| C   | 1.80110200  | -1.08253000 | -2.45805700 | H | 5.27362100  | 4.24080600  | -2.12025900 |
| C   | 0.76103400  | -2.22143700 | -2.51276100 | H | 2.81857300  | 4.28620200  | -2.58359300 |
| C   | -0.73362500 | -1.84413700 | -2.40695900 | H | 1.40478100  | 2.34282000  | -1.97930400 |
| P   | -1.22064800 | -1.44700200 | -0.64606100 | H | 3.03542500  | -3.08684800 | -0.80041300 |
| C   | -3.05705000 | -1.32295700 | -0.67628300 | H | 2.81065100  | 0.33967800  | 1.81649700  |
| C   | -3.64528900 | -0.57845000 | 0.35966200  | H | 3.97397000  | -0.96542500 | 3.60193600  |
| C   | -5.03249100 | -0.43532800 | 0.43806800  | H | 4.63551500  | -3.33861700 | 3.18524900  |
| C   | -5.85166800 | -1.02415200 | -0.53010000 | H | 4.14708400  | -4.38394000 | 0.97215300  |
| C   | -5.27581600 | -1.76002500 | -1.57150800 | C | -1.12220000 | -0.69711100 | -3.34100000 |
| C   | -3.88793700 | -1.91276500 | -1.64347200 | H | -2.20976700 | -0.54106900 | -3.36419400 |
| C   | -0.93934700 | -3.05430200 | 0.21049800  | H | -0.66036400 | 0.24960900  | -3.02635800 |

|                                      |             |             |             |                                      |             |             |             |
|--------------------------------------|-------------|-------------|-------------|--------------------------------------|-------------|-------------|-------------|
| H                                    | -0.78812900 | -0.91237900 | -4.36967900 | H                                    | -6.56728700 | -0.83135000 | 0.15373800  |
| C                                    | 3.13575200  | -1.50231100 | -3.08174200 | H                                    | -4.44917700 | 0.27329200  | 0.83238200  |
| H                                    | 3.56633000  | -2.39207300 | -2.60168000 | H                                    | -0.88878700 | 1.40166100  | -1.89521100 |
| H                                    | 2.98605300  | -1.74543100 | -4.14696600 | H                                    | -2.66331500 | 1.78344400  | 2.01850100  |
| H                                    | 3.88087600  | -0.69536900 | -3.02495600 | H                                    | -2.86259700 | 4.22888400  | 1.69278800  |
| Co                                   | -0.05339600 | 0.27661600  | 0.29226500  | H                                    | -2.10672500 | 5.27956800  | -0.43710800 |
|                                      |             |             |             | H                                    | -1.12646400 | 3.86356400  | -2.24329100 |
|                                      |             |             |             | H                                    | 4.43160800  | 0.34079200  | 0.19719900  |
| <b>cat<sub>S</sub><sup>DCE</sup></b> |             |             |             | H                                    | 6.41659100  | -1.07140300 | -0.27956900 |
| P                                    | 1.46579500  | -0.34529900 | 0.21608400  | H                                    | 6.13273300  | -3.46990000 | -0.89218300 |
| C                                    | 1.24653500  | -0.56418100 | 2.05931600  | H                                    | 3.84629200  | -4.45920500 | -1.02796700 |
| C                                    | -0.12632600 | -0.11138200 | 2.59157100  | H                                    | 1.84747500  | -3.03640700 | -0.54701100 |
| C                                    | -1.37430300 | -0.78051700 | 1.98993800  | H                                    | 1.08754700  | 2.30999200  | 1.65591500  |
| P                                    | -1.56835000 | -0.38795500 | 0.18041400  | H                                    | 2.60837400  | 0.85427600  | -2.12204000 |
| C                                    | -3.19180500 | -1.10270300 | -0.27598100 | H                                    | 2.96035100  | 3.18796600  | -2.86831400 |
| C                                    | -3.17204200 | -2.21874200 | -1.12765100 | H                                    | 2.37660300  | 5.08964800  | -1.35777600 |
| C                                    | -4.36414300 | -2.83593000 | -1.51455200 | H                                    | 1.44098000  | 4.62257900  | 0.90840400  |
| C                                    | -5.58540400 | -2.33734200 | -1.05059600 | C                                    | -1.38473600 | -2.30207200 | 2.16074400  |
| C                                    | -5.61186100 | -1.22185200 | -0.20515900 | H                                    | -2.36580200 | -2.72699200 | 1.90220000  |
| C                                    | -4.42044300 | -0.60217800 | 0.17982600  | H                                    | -0.63449200 | -2.77907600 | 1.51030300  |
| C                                    | -1.78295100 | 1.42732800  | 0.06431600  | H                                    | -1.16094400 | -2.57181600 | 3.20557400  |
| C                                    | -1.34898800 | 2.02915000  | -1.12791500 | C                                    | 2.39921900  | -0.00639700 | 2.89693600  |
| C                                    | -2.32792500 | 2.22856700  | 1.07983800  | H                                    | 2.42210200  | 1.09246100  | 2.89872800  |
| C                                    | -2.44143900 | 3.61003700  | 0.89668200  | H                                    | 2.28793300  | -0.33867500 | 3.94195700  |
| C                                    | -2.01861000 | 4.19915400  | -0.29925500 | H                                    | 3.37339900  | -0.36570200 | 2.53537900  |
| C                                    | -1.47333000 | 3.40582700  | -1.31410000 | Co                                   | -0.03132400 | -1.20088600 | -1.00916300 |
| C                                    | 3.01124700  | -1.26357800 | -0.13418000 |                                      |             |             |             |
| C                                    | 4.29918300  | -0.71046900 | -0.06582800 |                                      |             |             |             |
| C                                    | 5.41551600  | -1.50578800 | -0.33702700 | <b>cat<sub>T</sub><sup>DCE</sup></b> |             |             |             |
| C                                    | 5.25593900  | -2.85331000 | -0.67974500 | P                                    | 1.61093500  | -0.46521600 | 0.10840600  |
| C                                    | 3.97481100  | -3.40889000 | -0.75536300 | C                                    | 1.23434100  | -0.80837200 | 1.91041500  |
| C                                    | 2.85701000  | -2.61554100 | -0.48659500 | C                                    | -0.15709600 | -0.32765200 | 2.37510500  |
| C                                    | 1.84913100  | 1.40557000  | -0.16593600 | C                                    | -1.41758800 | -0.97023600 | 1.76388700  |
| C                                    | 1.51706800  | 2.48089400  | 0.67109000  | P                                    | -1.74576400 | -0.45776000 | -0.00369500 |
| C                                    | 2.36204200  | 1.67879600  | -1.44815400 | C                                    | -3.46684300 | -1.04313400 | -0.27610800 |
| C                                    | 2.55682900  | 2.99359800  | -1.87153800 | C                                    | -3.65515600 | -2.11116800 | -1.16645800 |
| C                                    | 2.23061900  | 4.05934100  | -1.02464900 | C                                    | -4.93410500 | -2.62539900 | -1.39957400 |
| C                                    | 1.71019100  | 3.79803500  | 0.24435000  | C                                    | -6.03808000 | -2.06715400 | -0.74886800 |
| H                                    | 1.28958200  | -1.66391600 | 2.12698400  | C                                    | -5.85950100 | -0.99718800 | 0.13600100  |
| H                                    | -0.22093300 | 0.98147800  | 2.51622600  | C                                    | -4.58097600 | -0.48728600 | 0.37260000  |
| H                                    | -0.13284200 | -0.33507300 | 3.67225700  | C                                    | -1.86847000 | 1.37225900  | 0.02854400  |
| H                                    | -2.25398700 | -0.36327200 | 2.50579000  | C                                    | -1.45359300 | 2.05028100  | -1.13012500 |
| H                                    | -2.20920400 | -2.60488300 | -1.47895600 | C                                    | -2.30163400 | 2.11846500  | 1.13599400  |
| H                                    | -4.34081700 | -3.70452300 | -2.17712500 | C                                    | -2.31990500 | 3.51517400  | 1.08048100  |
| H                                    | -6.52033200 | -2.81725000 | -1.35013600 | C                                    | -1.91126500 | 4.17957900  | -0.08023900 |

|   |             |             |             |                                      |             |             |             |
|---|-------------|-------------|-------------|--------------------------------------|-------------|-------------|-------------|
| C | -1.48121300 | 3.44431700  | -1.18928800 | H                                    | 3.30964900  | -0.77491400 | 2.61261900  |
| C | 3.26055200  | -1.23735100 | -0.12273600 | Co                                   | -0.03220800 | -1.10188000 | -1.28046100 |
| C | 4.47447500  | -0.58728400 | 0.15113900  |                                      |             |             |             |
| C | 5.68725200  | -1.25309800 | -0.04389100 | <b>TS4<sub>T</sub><sup>DCE</sup></b> |             |             |             |
| C | 5.69996000  | -2.57285100 | -0.50895800 | C                                    | -3.41386100 | -1.48632700 | -0.66063500 |
| C | 4.49511800  | -3.22575100 | -0.78770000 | C                                    | -4.41855300 | -1.19139900 | -1.59428600 |
| C | 3.28236000  | -2.55645800 | -0.60357000 | C                                    | -5.55599600 | -0.47480100 | -1.21270600 |
| C | 1.92687100  | 1.32610500  | -0.13807900 | C                                    | -5.70099700 | -0.03460900 | 0.10682800  |
| C | 1.59015200  | 2.33942600  | 0.77164900  | C                                    | -4.70279500 | -0.31805500 | 1.04141000  |
| C | 2.42332400  | 1.69411100  | -1.40383200 | C                                    | -3.57094400 | -1.04375400 | 0.66144800  |
| C | 2.59550200  | 3.03629400  | -1.74177200 | H                                    | -4.31834700 | -1.53531700 | -2.62665900 |
| C | 2.26035000  | 4.03907000  | -0.82435100 | H                                    | -6.33140300 | -0.25607900 | -1.95119700 |
| C | 1.75646200  | 3.68528000  | 0.42861500  | H                                    | -6.58471700 | 0.53564500  | 0.40193100  |
| H | 1.22844200  | -1.91143200 | 1.90398300  | H                                    | -4.80119500 | 0.03085100  | 2.07207900  |
| H | -0.22707300 | 0.76508400  | 2.28993700  | H                                    | -2.80333600 | -1.27070700 | 1.40136300  |
| H | -0.20290900 | -0.54124600 | 3.45675200  | C                                    | -2.23246000 | -2.35127000 | -1.05385700 |
| H | -2.27385400 | -0.60391500 | 2.35408700  | C                                    | -0.93361900 | -1.99349900 | -0.32486700 |
| H | -2.78801500 | -2.54106800 | -1.67599300 | O                                    | -0.53961900 | -2.38588000 | 0.75754800  |
| H | -5.06876500 | -3.45902500 | -2.09329800 | H                                    | 0.52285100  | -1.06826500 | -3.81309100 |
| H | -7.03989900 | -2.46339400 | -0.93209500 | C                                    | -1.59332200 | -2.07097200 | -2.43476500 |
| H | -6.72178800 | -0.55712100 | 0.64313600  | H                                    | -1.95342400 | -1.12954000 | -2.87290400 |
| H | -4.45352700 | 0.34923600  | 1.06279600  | H                                    | -1.73277400 | -2.87631700 | -3.16938100 |
| H | -1.09745600 | 1.47331000  | -1.98876000 | C                                    | -2.57480400 | -3.86125400 | -0.87496900 |
| H | -2.62247000 | 1.61486900  | 2.04967400  | H                                    | -1.68744800 | -4.44007900 | -1.18643400 |
| H | -2.65335700 | 4.08716500  | 1.94988200  | H                                    | -3.38557500 | -4.09068200 | -1.58445700 |
| H | -1.92131900 | 5.27157900  | -0.11775400 | C                                    | -0.14244300 | -1.91905100 | -1.95252200 |
| H | -1.15080200 | 3.95799900  | -2.09496500 | C                                    | 0.72575500  | -0.93314000 | -2.73661800 |
| H | 4.47303500  | 0.44278700  | 0.51332900  | H                                    | 0.38301500  | -2.88072800 | -1.86810900 |
| H | 6.62791900  | -0.73929500 | 0.16961000  | H                                    | 0.47864300  | 0.14406900  | -2.56204500 |
| H | 6.65057400  | -3.09025100 | -0.66001500 | H                                    | 1.79942900  | -1.07502400 | -2.56946900 |
| H | 4.50019900  | -4.25357900 | -1.15881600 | C                                    | -2.97643900 | -4.26372500 | 0.51278800  |
| H | 2.33742600  | -3.05461700 | -0.84061500 | C                                    | -4.20345700 | -4.66341800 | 0.85907500  |
| H | 1.18169200  | 2.09845200  | 1.75110800  | H                                    | -2.19256000 | -4.20056100 | 1.27455400  |
| H | 2.67637000  | 0.91838600  | -2.13222900 | H                                    | -4.44444600 | -4.94411000 | 1.88907800  |
| H | 2.98748700  | 3.30169900  | -2.72678800 | H                                    | -5.01476000 | -4.72195400 | 0.12469000  |
| H | 2.38692000  | 5.09135600  | -1.08976000 | P                                    | 2.10014000  | -0.70128800 | 0.42533700  |
| H | 1.48186800  | 4.45967500  | 1.14852800  | C                                    | 2.01372600  | -0.27630200 | 2.24470600  |
| C | -1.40797900 | -2.49914000 | 1.83080700  | C                                    | 1.54347400  | 1.17722600  | 2.47058700  |
| H | -2.38620000 | -2.92028100 | 1.55534800  | C                                    | 0.04953500  | 1.53395200  | 2.27235200  |
| H | -0.65575000 | -2.92641600 | 1.14811000  | P                                    | -0.42342200 | 1.75356900  | 0.48851700  |
| H | -1.16920500 | -2.83786000 | 2.85214200  | C                                    | -2.13323100 | 2.41949600  | 0.46804600  |
| C | 2.32865700  | -0.36073000 | 2.88402300  | C                                    | -2.88978900 | 2.24021100  | -0.70057800 |
| H | 2.42383300  | 0.73381300  | 2.93040900  | C                                    | -4.15917900 | 2.80961200  | -0.81534500 |
| H | 2.08718300  | -0.71621900 | 3.89914000  | C                                    | -4.69271200 | 3.54805300  | 0.24455900  |



|   |             |             |             |                                      |             |             |             |
|---|-------------|-------------|-------------|--------------------------------------|-------------|-------------|-------------|
| C | -1.96362500 | -0.31364800 | 2.61065500  | H                                    | 1.85582600  | 5.04849500  | 2.44085100  |
| C | -1.00020300 | -1.48819100 | 2.36803600  | H                                    | 0.91907000  | 2.77434100  | 2.30508000  |
| P | -0.78835300 | -1.74288900 | 0.52569600  | H                                    | -4.09352700 | 1.36687000  | 1.33564200  |
| C | 0.38178700  | -3.14731800 | 0.33976700  | H                                    | -1.63295700 | 1.88615700  | -2.18727500 |
| C | 1.72873600  | -2.95576900 | 0.70057100  | H                                    | -3.66038700 | 1.83201800  | -3.60195600 |
| C | 2.66468500  | -3.97444600 | 0.51304200  | H                                    | -5.90923000 | 1.52844700  | -2.55685700 |
| C | 2.27680800  | -5.19213800 | -0.05423800 | H                                    | -6.09841800 | 1.30438300  | -0.07984600 |
| C | 0.94697400  | -5.38178600 | -0.43776200 | C                                    | 0.28723700  | -1.39147600 | 3.18689600  |
| C | 0.00415800  | -4.36750000 | -0.24401900 | H                                    | 0.83380900  | -2.34395000 | 3.18414800  |
| C | -2.44816100 | -2.40474900 | 0.09535400  | H                                    | 0.96417000  | -0.60672800 | 2.82702800  |
| C | -3.23624100 | -1.76628400 | -0.87330900 | H                                    | 0.02440100  | -1.16481700 | 4.23342600  |
| C | -2.97687400 | -3.51858900 | 0.77451200  | C                                    | -2.20069000 | 2.15201200  | 3.17013200  |
| C | -4.25643800 | -3.98850400 | 0.47671800  | H                                    | -3.27762600 | 2.10135500  | 2.95896000  |
| C | -5.03113100 | -3.34877400 | -0.49766700 | H                                    | -2.06805300 | 1.96514500  | 4.24764500  |
| C | -4.51987500 | -2.23621200 | -1.16816500 | H                                    | -1.86306200 | 3.17629200  | 2.96321200  |
| C | -0.47150300 | 3.24813300  | 0.70130000  | Co                                   | -0.17121900 | 0.01767000  | -0.74032700 |
| C | -0.92602600 | 4.26089200  | -0.15673600 |                                      |             |             |             |
| C | -0.38032500 | 5.54555700  | -0.08397500 |                                      |             |             |             |
| C | 0.61936300  | 5.83586900  | 0.84800800  | <b>TS8<sub>s</sub><sup>DCE</sup></b> |             |             |             |
| C | 1.07317300  | 4.83264400  | 1.70985000  | C                                    | -3.98572100 | -2.03057300 | -0.92007200 |
| C | 0.53563900  | 3.54638200  | 1.63764700  | C                                    | -4.27545000 | -1.70761700 | -2.25825700 |
| C | -2.70740200 | 1.63620600  | -0.31727900 | C                                    | -5.57360300 | -1.80602500 | -2.75988900 |
| C | -3.97736200 | 1.47347000  | 0.25954100  | C                                    | -6.61707700 | -2.23710700 | -1.93304600 |
| C | -2.61144900 | 1.76311500  | -1.71853600 | C                                    | -6.34454700 | -2.56461900 | -0.60362700 |
| C | -3.75510500 | 1.73022400  | -2.51837500 | C                                    | -5.04215600 | -2.45931400 | -0.10205500 |
| C | -5.01308900 | 1.56218500  | -1.93285700 | H                                    | -3.47408700 | -1.36698900 | -2.91613200 |
| C | -5.11886800 | 1.43711600  | -0.54473800 | H                                    | -5.77263500 | -1.54347800 | -3.80214600 |
| H | -0.37296500 | 1.11889400  | 2.76438500  | H                                    | -7.63438300 | -2.31671000 | -2.32433000 |
| H | -2.88897800 | -0.46214000 | 2.03373100  | H                                    | -7.14880800 | -2.90587600 | 0.05330600  |
| H | -2.26231900 | -0.36579600 | 3.67061000  | H                                    | -4.85966600 | -2.72197200 | 0.94029800  |
| H | -1.52892200 | -2.39769200 | 2.69095000  | C                                    | -2.56448800 | -1.90684200 | -0.40785700 |
| H | 2.06340000  | -2.00839100 | 1.12075100  | C                                    | -1.93594200 | -0.50883700 | -0.61708200 |
| H | 3.70382200  | -3.80580400 | 0.80191000  | O                                    | -2.48848200 | 0.41340300  | -1.15785900 |
| H | 3.01111100  | -5.98733000 | -0.20360400 | H                                    | 0.32708500  | -0.21336600 | -1.65026700 |
| H | 0.63549700  | -6.32476300 | -0.89362600 | C                                    | -1.58940000 | -2.85790200 | -1.16806800 |
| H | -1.02574200 | -4.53305000 | -0.55995600 | H                                    | -1.87083000 | -2.88705500 | -2.23076300 |
| H | -2.86651700 | -0.88637200 | -1.39561500 | H                                    | -1.70257500 | -3.88058900 | -0.77937800 |
| H | -2.38693100 | -4.03097200 | 1.53696000  | C                                    | -2.42372700 | -2.02121000 | 1.12903900  |
| H | -4.65057700 | -4.85780800 | 1.00839600  | H                                    | -2.65093400 | -3.04726300 | 1.46455900  |
| H | -6.03371100 | -3.71668400 | -0.72890700 | H                                    | -3.15267900 | -1.34826900 | 1.59786700  |
| H | -5.11985800 | -1.72184200 | -1.92184400 | C                                    | -0.13440000 | -2.38462900 | -1.04897500 |
| H | -1.71241100 | 4.05679600  | -0.88395600 | C                                    | 0.29180000  | -1.29492000 | -2.02611500 |
| H | -0.74462800 | 6.32370600  | -0.75894100 | H                                    | 0.59052000  | -3.20008800 | -1.09545300 |
| H | 1.04357100  | 6.84109500  | 0.90350400  | H                                    | 1.30500700  | -1.45989100 | -2.41059900 |
|   |             |             |             | H                                    | -0.41850000 | -1.20674000 | -2.86115700 |

|   |             |             |             |                     |             |             |             |
|---|-------------|-------------|-------------|---------------------|-------------|-------------|-------------|
| C | -1.00276500 | -1.64455700 | 1.50898200  | H                   | 0.97572600  | 4.20558300  | 0.97109300  |
| C | -0.02590600 | -2.53699500 | 0.98428700  | H                   | 1.44766500  | 5.90263200  | -0.73547000 |
| H | -0.82754100 | -1.19605600 | 2.48790200  | H                   | 0.73535700  | 5.55137600  | -3.10214200 |
| H | 0.97850800  | -2.52348700 | 1.39754900  | H                   | -0.47949200 | 3.45817400  | -3.72420300 |
| H | -0.34334600 | -3.55817300 | 0.76733200  | H                   | 3.11512600  | -2.46755600 | -1.56513600 |
| P | 2.34207300  | -0.45402000 | 0.39867300  | H                   | 3.96603100  | -4.78155800 | -1.38720200 |
| C | 2.89725100  | 0.48300300  | 1.91370900  | H                   | 4.47114100  | -5.76605800 | 0.85172700  |
| C | 2.24759000  | 1.87492100  | 1.95694200  | H                   | 4.10888600  | -4.40108300 | 2.90956700  |
| C | 0.74469500  | 1.94580600  | 2.28556600  | H                   | 3.24455500  | -2.10036200 | 2.74330100  |
| P | -0.35533400 | 1.49522800  | 0.83683900  | H                   | 5.17131000  | -0.74525500 | -0.52537200 |
| C | -2.03344700 | 1.98280000  | 1.43216700  | H                   | 1.66774600  | 1.49993600  | -1.67040900 |
| C | -2.68860700 | 1.20193200  | 2.39915600  | H                   | 2.95703500  | 2.62494700  | -3.44514100 |
| C | -3.96331700 | 1.54640600  | 2.85271600  | H                   | 5.37452900  | 2.07168700  | -3.77700900 |
| C | -4.60904800 | 2.67611900  | 2.34210400  | H                   | 6.46493200  | 0.37872900  | -2.30319500 |
| C | -3.96689600 | 3.45856700  | 1.37954000  | C                   | 0.40662300  | 1.18554200  | 3.56949100  |
| C | -2.68945800 | 3.11612200  | 0.92671900  | H                   | -0.59492700 | 1.43463300  | 3.94144400  |
| C | 0.00853700  | 2.81955900  | -0.39917400 | H                   | 0.46425300  | 0.09584600  | 3.44268000  |
| C | -0.40445500 | 2.64008400  | -1.73095600 | H                   | 1.12883000  | 1.46721100  | 4.35283700  |
| C | 0.66417400  | 4.01249400  | -0.05450600 | C                   | 4.41561200  | 0.60349300  | 2.05442200  |
| C | 0.92757700  | 4.98567500  | -1.02275300 | H                   | 4.83202800  | 1.28638400  | 1.29924500  |
| C | 0.52716600  | 4.79008700  | -2.34655600 | H                   | 4.65656400  | 1.01604600  | 3.04752200  |
| C | -0.14920800 | 3.61710500  | -2.69488100 | H                   | 4.92777900  | -0.36390500 | 1.95933700  |
| C | 3.12458900  | -2.10705600 | 0.57259200  | Co                  | -0.11241700 | -0.58714600 | 0.03063400  |
| C | 3.32630800  | -2.88700600 | -0.58023700 |                     |             |             |             |
| C | 3.80928100  | -4.19281900 | -0.48016100 | cat <sub>LIRh</sub> |             |             |             |
| C | 4.09278600  | -4.74409100 | 0.77375200  | P                   | 1.47124900  | -0.27898400 | 0.30743200  |
| C | 3.88987600  | -3.97988900 | 1.92548300  | C                   | 1.24514500  | -0.44585900 | 2.15133700  |
| C | 3.40604200  | -2.67167400 | 1.82807500  | C                   | -0.12329500 | 0.04078500  | 2.67359200  |
| C | 3.32003100  | 0.30161000  | -0.96418000 | C                   | -1.38480400 | -0.62853000 | 2.09360900  |
| C | 4.67940700  | -0.00624700 | -1.15790400 | P                   | -1.55221100 | -0.32867100 | 0.26711600  |
| C | 2.71653300  | 1.24915300  | -1.80244000 | C                   | -3.18184300 | -1.03866600 | -0.17869900 |
| C | 3.44918800  | 1.88741000  | -2.80697200 | C                   | -3.20090100 | -2.19703600 | -0.97076800 |
| C | 4.79858100  | 1.57782600  | -2.99056300 | C                   | -4.41546200 | -2.78505300 | -1.32869200 |
| C | 5.41000200  | 0.62768300  | -2.16452400 | C                   | -5.61648100 | -2.21949500 | -0.89439600 |
| H | 2.51313600  | -0.11704400 | 2.75215900  | C                   | -5.60271600 | -1.06483200 | -0.10612200 |
| H | 2.47337500  | 2.40815000  | 1.02043400  | C                   | -4.39071000 | -0.47225900 | 0.24897300  |
| H | 2.76204200  | 2.44219600  | 2.75058000  | C                   | -1.77008600 | 1.48348800  | 0.07747700  |
| H | 0.50509000  | 3.00443400  | 2.46763300  | C                   | -1.44273500 | 2.04306200  | -1.16796600 |
| H | -2.20808700 | 0.31438400  | 2.80274100  | C                   | -2.22573600 | 2.32165200  | 1.10482100  |
| H | -4.45445500 | 0.92382500  | 3.60445000  | C                   | -2.34207300 | 3.69688800  | 0.88980000  |
| H | -5.60953500 | 2.94303400  | 2.69096500  | C                   | -2.01393200 | 4.24446300  | -0.35163600 |
| H | -4.46288600 | 4.34188900  | 0.96984600  | C                   | -1.56993500 | 3.41354500  | -1.38435400 |
| H | -2.21373500 | 3.73605600  | 0.16727200  | C                   | 3.05114200  | -1.14543500 | -0.02716600 |
| H | -0.94728800 | 1.73846100  | -2.00839300 | C                   | 4.30329300  | -0.51625400 | 0.02947200  |

|    |             |             |             |                   |             |             |             |
|----|-------------|-------------|-------------|-------------------|-------------|-------------|-------------|
| C  | 5.46306000  | -1.24404700 | -0.23939300 | $3_{\text{LIRh}}$ |             |             |             |
| C  | 5.38287900  | -2.59971500 | -0.57030600 | C                 | -3.36095000 | -0.94012200 | -0.91791100 |
| C  | 4.13893100  | -3.23222800 | -0.63142900 | C                 | -4.09277600 | -1.29111700 | -2.06166900 |
| C  | 2.97630800  | -2.50830900 | -0.36189700 | C                 | -4.98368800 | -0.39133800 | -2.64569100 |
| C  | 1.79898400  | 1.47086200  | -0.13350200 | C                 | -5.16930500 | 0.87854800  | -2.09122600 |
| C  | 1.48876000  | 2.56259100  | 0.68763900  | C                 | -4.46224800 | 1.23256700  | -0.94299500 |
| C  | 2.26450800  | 1.71473100  | -1.43882600 | C                 | -3.56793200 | 0.32939900  | -0.36106300 |
| C  | 2.42448600  | 3.01784700  | -1.90370200 | H                 | -3.97030200 | -2.27499700 | -2.50178300 |
| C  | 2.11176800  | 4.10069000  | -1.07573100 | H                 | -5.53746000 | -0.68423000 | -3.53316500 |
| C  | 1.64509100  | 3.86868900  | 0.21760100  | H                 | -5.86537800 | 1.57824500  | -2.54423200 |
| H  | 1.27921100  | -1.53683400 | 2.25779600  | H                 | -4.60081400 | 2.21036400  | -0.49397300 |
| H  | -0.20292100 | 1.12466600  | 2.56477600  | H                 | -3.04095800 | 0.62099600  | 0.54187900  |
| H  | -0.13006800 | -0.15497600 | 3.75313700  | C                 | -2.44776700 | -1.96526500 | -0.24473100 |
| H  | -2.25266200 | -0.16228000 | 2.57365700  | C                 | -1.42239900 | -1.24303500 | 0.67634900  |
| H  | -2.26116600 | -2.63902100 | -1.29801800 | O                 | -1.42145600 | -1.36995500 | 1.88418000  |
| H  | -4.42370800 | -3.68085900 | -1.94255600 | H                 | -1.42818000 | -0.12866900 | -2.78934900 |
| H  | -6.56229700 | -2.67600600 | -1.17060800 | C                 | -1.52862800 | -2.71586200 | -1.24118400 |
| H  | -6.53692600 | -0.62496300 | 0.23020600  | H                 | -2.12488100 | -3.17178300 | -2.04112100 |
| H  | -4.38578100 | 0.42961800  | 0.85343100  | H                 | -1.06710400 | -3.53913500 | -0.68722300 |
| H  | -1.06541400 | 1.39439300  | -1.95411700 | C                 | -3.31254800 | -2.98919700 | 0.54811300  |
| H  | -2.48694800 | 1.91293000  | 2.07490000  | H                 | -2.62425200 | -3.65842400 | 1.07828400  |
| H  | -2.68758300 | 4.33881400  | 1.69470000  | H                 | -3.85080400 | -3.58853900 | -0.19480900 |
| H  | -2.09942000 | 5.31483400  | -0.51352900 | C                 | -0.42691600 | -1.80470600 | -1.78466900 |
| H  | -1.30501100 | 3.83569000  | -2.34900400 | C                 | -0.77611700 | -0.98396300 | -3.02139100 |
| H  | 4.37188500  | 0.53701700  | 0.28031500  | H                 | 0.47338700  | -2.39451800 | -1.96800400 |
| H  | 6.43008900  | -0.75247300 | -0.18990300 | H                 | 0.12664000  | -0.58800100 | -3.49942900 |
| H  | 6.28835600  | -3.16071600 | -0.78161600 | H                 | -1.31880100 | -1.58020100 | -3.77017400 |
| H  | 4.07316700  | -4.28475900 | -0.89060300 | C                 | -4.29212900 | -2.38991900 | 1.51454800  |
| H  | 2.00163400  | -2.99205900 | -0.40781500 | C                 | -5.61620900 | -2.40423800 | 1.34938400  |
| H  | 1.10769300  | 2.41473000  | 1.68820000  | H                 | -3.86511100 | -1.91005100 | 2.39284400  |
| H  | 2.49807600  | 0.87947600  | -2.09278100 | H                 | -6.28771600 | -1.95438000 | 2.07635200  |
| H  | 2.78778300  | 3.18882300  | -2.91275200 | H                 | -6.07641500 | -2.86957600 | 0.47970900  |
| H  | 2.22800300  | 5.11688000  | -1.44017800 | P                 | 1.58853700  | -1.14627400 | 0.52225200  |
| H  | 1.39214900  | 4.70251900  | 0.86528700  | C                 | 1.79969300  | -0.69618700 | 2.32070400  |
| C  | -1.43657400 | -2.13667600 | 2.36765400  | C                 | 1.97926500  | 0.81127300  | 2.62253400  |
| H  | -2.40924000 | -2.55482300 | 2.09373300  | C                 | 0.74637200  | 1.73404600  | 2.53400400  |
| H  | -0.66933800 | -2.67412400 | 1.80068700  | P                 | 0.17184000  | 1.88922800  | 0.78157300  |
| H  | -1.27326100 | -2.32509000 | 3.43431000  | C                 | -1.05933500 | 3.25030100  | 0.75732200  |
| C  | 2.40215200  | 0.13382000  | 2.97537000  | C                 | -1.86127000 | 3.37251700  | -0.38713200 |
| H  | 2.44487100  | 1.22403400  | 2.92390100  | C                 | -2.76101200 | 4.43147600  | -0.51256800 |
| H  | 2.27120600  | -0.14665100 | 4.02612500  | C                 | -2.87838000 | 5.37303000  | 0.51228000  |
| H  | 3.36552400  | -0.25914500 | 2.64101300  | C                 | -2.08295400 | 5.25853600  | 1.65484200  |
| Rh | -0.00997400 | -1.24327000 | -0.95438800 | C                 | -1.17152900 | 4.20836800  | 1.77587000  |
|    |             |             |             | C                 | 1.57587400  | 2.66802000  | -0.11545200 |



|   |             |             |             |                                 |             |             |             |
|---|-------------|-------------|-------------|---------------------------------|-------------|-------------|-------------|
| C | 1.71358700  | 2.35271300  | -1.47584200 | H                               | -0.02056000 | 1.19056100  | 4.47964400  |
| C | 2.48386700  | 3.55830000  | 0.47472400  | C                               | 2.89412100  | -1.51706300 | 3.02501700  |
| C | 3.51950200  | 4.10848600  | -0.28180600 | H                               | 3.89933300  | -1.21234200 | 2.72386100  |
| C | 3.65018800  | 3.78779900  | -1.63543200 | H                               | 2.80809300  | -1.35779000 | 4.10470600  |
| C | 2.74082800  | 2.91383800  | -2.23477900 | H                               | 2.79394000  | -2.58667300 | 2.83419700  |
| C | 1.61140500  | -2.98193200 | 0.52170400  | Rh                              | -0.19384000 | -0.21874200 | -0.44243400 |
| C | 2.42155800  | -3.70658900 | -0.36274900 |                                 |             |             |             |
| C | 2.36674100  | -5.10209200 | -0.38868400 | TS <sub>4</sub> <sub>LIRh</sub> |             |             |             |
| C | 1.51243800  | -5.78978800 | 0.47308300  | C                               | -3.59784600 | -0.91733500 | -0.53447800 |
| C | 0.71365200  | -5.07454800 | 1.36929700  | C                               | -4.46240900 | -0.54491100 | -1.57344200 |
| C | 0.75794900  | -3.68187800 | 1.39286700  | C                               | -5.46309700 | 0.40571900  | -1.36413600 |
| C | 3.03759300  | -0.62832800 | -0.46976000 | C                               | -5.61166200 | 1.00446700  | -0.11105500 |
| C | 4.18978400  | -0.05656200 | 0.08810900  | C                               | -4.75098900 | 0.64676800  | 0.92829500  |
| C | 2.96504300  | -0.78142500 | -1.86680600 | C                               | -3.75762800 | -0.30993600 | 0.71753700  |
| C | 4.02508100  | -0.38766300 | -2.68007600 | H                               | -4.36675200 | -1.01637500 | -2.54730900 |
| C | 5.16397900  | 0.19049900  | -2.11543600 | H                               | -6.12694900 | 0.67781400  | -2.17994000 |
| C | 5.24029500  | 0.35744800  | -0.73255800 | H                               | -6.38603200 | 1.74813700  | 0.05116200  |
| H | 0.83168600  | -1.00868100 | 2.72559600  | H                               | -4.85256300 | 1.11165200  | 1.90463100  |
| H | 2.78514900  | 1.23182300  | 2.01831300  | H                               | -3.10823200 | -0.60120700 | 1.53169800  |
| H | 2.32399400  | 0.86753400  | 3.66162700  | C                               | -2.63267400 | -2.05724500 | -0.72071800 |
| H | 1.08674600  | 2.72361400  | 2.85695000  | C                               | -1.16749700 | -2.02160900 | -0.13317700 |
| H | -1.78152000 | 2.63707000  | -1.18164200 | O                               | -0.88519300 | -2.40355800 | 1.02014100  |
| H | -3.37567200 | 4.51288000  | -1.40396900 | H                               | 0.29021600  | -2.67931500 | -3.51561400 |
| H | -3.58442300 | 6.19290800  | 0.42054800  | C                               | -2.04347600 | -2.29114000 | -2.12770000 |
| H | -2.16568500 | 5.99130700  | 2.45215300  | H                               | -2.01008000 | -1.36602100 | -2.71434500 |
| H | -0.54819900 | 4.14845700  | 2.66120000  | H                               | -2.52641700 | -3.07041500 | -2.72365700 |
| H | 1.01814300  | 1.65337000  | -1.93540600 | C                               | -3.32185000 | -3.38001200 | -0.23696600 |
| H | 2.39279100  | 3.82495400  | 1.52259600  | H                               | -2.62634300 | -4.20753000 | -0.42746300 |
| H | 4.22412300  | 4.78961800  | 0.18624300  | H                               | -4.19432200 | -3.53200800 | -0.88339000 |
| H | 4.45910500  | 4.21561300  | -2.21995600 | C                               | -0.64474700 | -2.63539600 | -1.59043100 |
| H | 2.84218500  | 2.65372400  | -3.28375000 | C                               | 0.52088600  | -2.26315600 | -2.52691900 |
| H | 3.09817000  | -3.19254500 | -1.03462500 | H                               | -0.54291900 | -3.69893100 | -1.35323800 |
| H | 2.99894000  | -5.64793600 | -1.08261100 | H                               | 0.65759200  | -1.18033300 | -2.69198500 |
| H | 1.47216300  | -6.87461500 | 0.45204500  | H                               | 1.47266400  | -2.67508200 | -2.19904800 |
| H | 0.05089000  | -5.59940400 | 2.05075800  | C                               | -3.74593100 | -3.41584700 | 1.20087600  |
| H | 0.12309000  | -3.14644400 | 2.08784700  | C                               | -5.01221200 | -3.52506500 | 1.60753000  |
| H | 4.28462700  | 0.07215500  | 1.15673200  | H                               | -2.94246900 | -3.34800600 | 1.93030600  |
| H | 2.08056900  | -1.21020100 | -2.32045900 | H                               | -5.27314200 | -3.56014700 | 2.66235600  |
| H | 3.95386100  | -0.52110500 | -3.75520800 | H                               | -5.83518300 | -3.58439600 | 0.89727600  |
| H | 5.98482200  | 0.51132500  | -2.74943700 | P                               | 1.84236200  | -0.86815000 | 0.44370700  |
| H | 6.12097900  | 0.80660800  | -0.28404200 | C                               | 1.58290400  | -0.82726300 | 2.28486400  |
| C | -0.39853400 | 1.29665800  | 3.45652300  | C                               | 1.38918900  | 0.61416700  | 2.79130400  |
| H | -1.20269500 | 2.03644000  | 3.47211900  | C                               | 0.07511500  | 1.32402500  | 2.40062600  |
| H | -0.82484500 | 0.34336700  | 3.14291600  | P                               | -0.09736400 | 1.54828000  | 0.56738700  |

|   |             |             |             |            |             |             |             |
|---|-------------|-------------|-------------|------------|-------------|-------------|-------------|
| C | -1.65925300 | 2.44505100  | 0.24505300  | H          | 2.32975700  | 0.59752000  | -1.94305200 |
| C | -2.22599800 | 2.32403500  | -1.03250200 | H          | 4.18812000  | 2.03639400  | -2.75178400 |
| C | -3.31479400 | 3.11573800  | -1.39464900 | H          | 6.11497300  | 2.52460600  | -1.25720700 |
| C | -3.85222000 | 4.02379200  | -0.47938600 | H          | 6.18946200  | 1.54134300  | 1.02463800  |
| C | -3.30078800 | 4.13629500  | 0.79858600  | C          | -1.14137400 | 0.58674900  | 2.97446300  |
| C | -2.20198400 | 3.35610000  | 1.16101200  | H          | -2.06726900 | 1.14043400  | 2.81025000  |
| C | 1.09336600  | 2.86862900  | 0.08097600  | H          | -1.25045900 | -0.40518700 | 2.53185900  |
| C | 1.07332100  | 3.28285000  | -1.26172500 | H          | -1.00534900 | 0.46690400  | 4.05471300  |
| C | 1.97651500  | 3.49067800  | 0.97055800  | C          | 2.63346300  | -1.56263400 | 3.12921900  |
| C | 2.83745200  | 4.49543100  | 0.52005000  | H          | 3.56566800  | -1.00045500 | 3.22040100  |
| C | 2.81073700  | 4.90172000  | -0.81357400 | H          | 2.23192100  | -1.69352900 | 4.13974500  |
| C | 1.91807700  | 4.29716500  | -1.70361400 | H          | 2.86698600  | -2.55118200 | 2.73013800  |
| C | 2.50113600  | -2.53951800 | 0.06294000  | Rh         | 0.01488700  | -0.28887000 | -0.71946700 |
| C | 3.68611900  | -2.68440400 | -0.67564300 |            |             |             |             |
| C | 4.16412100  | -3.95591000 | -0.99623100 | $4_{LIRh}$ |             |             |             |
| C | 3.47105900  | -5.09349600 | -0.57967500 | C          | 3.11686400  | 1.77507100  | 0.50308700  |
| C | 2.29741700  | -4.95470500 | 0.16547100  | C          | 3.18544100  | 3.07821100  | 1.01773800  |
| C | 1.81062600  | -3.68796100 | 0.48546400  | C          | 2.68987700  | 4.15950000  | 0.28816800  |
| C | 3.22250800  | 0.23762500  | -0.02090600 | C          | 2.11072400  | 3.95963500  | -0.96743900 |
| C | 4.31789100  | 0.50568100  | 0.81203600  | C          | 2.03207200  | 2.67062700  | -1.48937500 |
| C | 3.18926500  | 0.79419000  | -1.30811400 | C          | 2.53135200  | 1.58198700  | -0.76312000 |
| C | 4.22987200  | 1.60584200  | -1.75634400 | H          | 3.64817500  | 3.25267200  | 1.98362400  |
| C | 5.30973800  | 1.88153300  | -0.91508000 | H          | 2.75399500  | 5.16084100  | 0.70297100  |
| C | 5.35103400  | 1.33106100  | 0.36762500  | H          | 1.71080400  | 4.80042900  | -1.52482700 |
| H | 0.64131900  | -1.37655700 | 2.36904100  | H          | 1.58377100  | 2.50036100  | -2.46184300 |
| H | 2.25670200  | 1.21419500  | 2.50733000  | H          | 2.51978100  | 0.59506600  | -1.20925300 |
| H | 1.39396800  | 0.57179000  | 3.88667600  | C          | 3.73897000  | 0.61648500  | 1.24547400  |
| H | 0.11088000  | 2.33256600  | 2.82774000  | C          | 2.82335600  | -0.54057100 | 1.63821400  |
| H | -1.80784700 | 1.61623900  | -1.74366300 | O          | 1.74609100  | -0.94055000 | 1.20905900  |
| H | -3.74956000 | 3.01515600  | -2.38381700 | H          | 3.10637300  | -1.01652900 | 5.10173400  |
| H | -4.70377200 | 4.63654500  | -0.75913700 | C          | 4.00660300  | 0.72471200  | 2.79185200  |
| H | -3.71982000 | 4.83820300  | 1.51334200  | H          | 3.34582000  | 1.44782900  | 3.27304400  |
| H | -1.76664700 | 3.47174100  | 2.14784800  | H          | 5.04335600  | 0.90588500  | 3.07754300  |
| H | 0.39582900  | 2.80791600  | -1.96459600 | C          | 5.03964700  | 0.10384900  | 0.53206200  |
| H | 2.00450300  | 3.20966800  | 2.01571200  | H          | 5.58360300  | -0.52872900 | 1.24304000  |
| H | 3.52425300  | 4.96222500  | 1.21970000  | H          | 5.66144800  | 0.98261500  | 0.33488000  |
| H | 3.47934100  | 5.68438800  | -1.15891900 | C          | 3.46739900  | -0.73518600 | 2.99144700  |
| H | 1.88880100  | 4.60761000  | -2.74378300 | C          | 2.55346900  | -1.06718200 | 4.15884000  |
| H | 4.23611500  | -1.81214600 | -1.00726300 | H          | 4.29467000  | -1.45038700 | 2.91834100  |
| H | 5.08058900  | -4.05363000 | -1.57043100 | H          | 1.71624900  | -0.36359800 | 4.21414500  |
| H | 3.84450500  | -6.08182300 | -0.83065900 | H          | 2.14577900  | -2.07791000 | 4.05857700  |
| H | 1.75514100  | -5.83546800 | 0.49690100  | C          | 4.80652000  | -0.68114200 | -0.72384800 |
| H | 0.88337100  | -3.57921300 | 1.03469100  | C          | 5.21975800  | -0.31908200 | -1.93903300 |
| H | 4.37582700  | 0.07500600  | 1.80250100  | H          | 4.26932000  | -1.62100900 | -0.60257200 |

|   |             |             |             |                     |             |             |             |
|---|-------------|-------------|-------------|---------------------|-------------|-------------|-------------|
| H | 5.04051800  | -0.94275500 | -2.81099800 | H                   | -3.91620300 | -0.24775400 | 3.44195300  |
| H | 5.75542500  | 0.61354000  | -2.10400700 | H                   | -0.26133700 | -4.61176500 | -0.04349300 |
| P | -0.66322300 | -1.70714300 | -0.73963300 | H                   | 1.56313600  | -6.18857200 | -0.57283000 |
| C | -1.47691600 | -1.61978400 | -2.42000200 | H                   | 3.51910100  | -5.43700700 | -1.90948000 |
| C | -2.55042400 | -0.52532100 | -2.57771800 | H                   | 3.63829100  | -3.08476000 | -2.71110000 |
| C | -2.08183700 | 0.93603700  | -2.40748200 | H                   | 1.83069100  | -1.49059000 | -2.14581100 |
| P | -1.57098900 | 1.23289700  | -0.65105900 | H                   | -3.61099300 | -2.45226200 | -0.69271200 |
| C | -1.36895700 | 3.03951900  | -0.40991500 | H                   | -0.18397200 | -2.63912500 | 1.91182500  |
| C | -0.80211400 | 3.44557100  | 0.80923600  | H                   | -1.60826500 | -3.56695200 | 3.70546400  |
| C | -0.64097700 | 4.79911900  | 1.09826400  | H                   | -4.04039700 | -3.92208600 | 3.30932700  |
| C | -1.03676900 | 5.76284400  | 0.16759400  | H                   | -5.02323200 | -3.35568200 | 1.09682100  |
| C | -1.60260700 | 5.36633600  | -1.04582500 | C                   | -0.94424800 | 1.29687500  | -3.37103600 |
| C | -1.77640400 | 4.01067400  | -1.33361300 | H                   | -0.70432300 | 2.36160900  | -3.33345500 |
| C | -3.08201900 | 0.91762900  | 0.34913200  | H                   | -0.03192100 | 0.74355000  | -3.13235300 |
| C | -2.93195300 | 0.37721200  | 1.63379100  | H                   | -1.23737400 | 1.05127800  | -4.39778500 |
| C | -4.36315900 | 1.26358700  | -0.10479300 | C                   | -1.97274100 | -2.97700900 | -2.93870100 |
| C | -5.47633900 | 1.05098900  | 0.70880000  | H                   | -2.86681300 | -3.32273700 | -2.41638100 |
| C | -5.31896100 | 0.50862500  | 1.98721800  | H                   | -2.22248300 | -2.88407800 | -4.00109200 |
| C | -4.04415100 | 0.17948000  | 2.45214200  | H                   | -1.20521300 | -3.74847900 | -2.84039200 |
| C | 0.65918100  | -2.94084000 | -1.05688900 | Rh                  | 0.22296700  | 0.14057600  | 0.02660400  |
| C | 0.59176500  | -4.26965300 | -0.61826300 |                     |             |             |             |
| C | 1.62317500  | -5.16166700 | -0.92094100 | TS5 <sub>LIRh</sub> |             |             |             |
| C | 2.72037700  | -4.74025200 | -1.67374000 | C                   | 3.81824000  | 0.84372000  | -0.66400900 |
| C | 2.78767500  | -3.41907600 | -2.12476100 | C                   | 4.55798800  | 0.47638000  | -1.79713700 |
| C | 1.76685500  | -2.52247200 | -1.81208000 | C                   | 5.86857800  | 0.01482600  | -1.67475300 |
| C | -1.78569500 | -2.50634500 | 0.46700100  | C                   | 6.46180700  | -0.08941600 | -0.41423800 |
| C | -3.15468900 | -2.70661800 | 0.25431000  | C                   | 5.73678100  | 0.28532100  | 0.71771300  |
| C | -1.23968700 | -2.81382500 | 1.72699000  | C                   | 4.42688200  | 0.75531300  | 0.59410100  |
| C | -2.04445300 | -3.32864200 | 2.73981700  | H                   | 4.10760600  | 0.54687500  | -2.78246800 |
| C | -3.41092900 | -3.52912600 | 2.51665900  | H                   | 6.42378700  | -0.26685400 | -2.56474600 |
| C | -3.96154700 | -3.21470000 | 1.27511800  | H                   | 7.47935300  | -0.45595700 | -0.31691800 |
| H | -0.61658200 | -1.33406500 | -3.03672800 | H                   | 6.18812900  | 0.21526000  | 1.70317700  |
| H | -3.39340700 | -0.72068600 | -1.90963700 | H                   | 3.87575300  | 1.04652100  | 1.47943700  |
| H | -2.94109300 | -0.61588900 | -3.59862200 | C                   | 2.40354000  | 1.38255900  | -0.84176800 |
| H | -2.94493500 | 1.57412600  | -2.62295500 | C                   | 1.45066600  | 1.04911100  | 0.32924100  |
| H | -0.48211600 | 2.69623600  | 1.52983500  | O                   | 1.59422100  | 1.34786900  | 1.49549600  |
| H | -0.19795800 | 5.10065800  | 2.04250200  | H                   | 0.19299900  | -1.01580900 | -3.60633000 |
| H | -0.90614400 | 6.81803500  | 0.38776100  | C                   | 1.63314200  | 0.69431600  | -1.99567100 |
| H | -1.91847500 | 6.11259700  | -1.76874000 | H                   | 1.58522900  | 1.19750000  | -2.96057700 |
| H | -2.23702900 | 3.72223100  | -2.27205900 | H                   | 0.25080400  | 1.35285300  | -1.69627200 |
| H | -1.93963800 | 0.09492100  | 1.97254700  | C                   | 2.43055000  | 2.92455800  | -1.07683900 |
| H | -4.49686200 | 1.70615100  | -1.08712600 | H                   | 1.39692400  | 3.25205000  | -1.24560700 |
| H | -6.46594200 | 1.31414100  | 0.34697000  | H                   | 2.98827600  | 3.08823000  | -2.00519800 |
| H | -6.18765600 | 0.34431900  | 2.61779600  | C                   | 1.51576400  | -0.72093600 | -1.91489700 |

|   |             |             |             |            |             |             |             |
|---|-------------|-------------|-------------|------------|-------------|-------------|-------------|
| C | 1.00030900  | -1.53209500 | -3.07589700 | H          | 4.48157800  | -5.02004400 | 0.81156300  |
| H | 2.20675800  | -1.23026900 | -1.25194600 | H          | 2.28253900  | -6.05933800 | 0.29870600  |
| H | 1.80587900  | -1.72030700 | -3.79950400 | H          | 0.22866600  | -4.69182700 | 0.30088900  |
| H | 0.62612600  | -2.50454000 | -2.74389400 | H          | -1.50071300 | -1.67102300 | -1.80900600 |
| C | 3.04085700  | 3.72134200  | 0.03697700  | H          | -1.93005700 | -4.05305000 | 1.75767300  |
| C | 4.17001100  | 4.42192200  | -0.07802400 | H          | -3.78504600 | -5.28544800 | 0.70401200  |
| H | 2.51306400  | 3.70807000  | 0.98819000  | H          | -4.50783400 | -4.72839300 | -1.60750700 |
| H | 4.57290500  | 4.99407300  | 0.75353100  | H          | -3.35323000 | -2.91679400 | -2.86254200 |
| H | 4.73015700  | 4.44923400  | -1.01067600 | H          | -3.96347700 | 3.11799700  | -0.14264300 |
| P | -1.78535500 | 1.19523500  | 0.50300300  | H          | -4.02485600 | 5.58488800  | -0.24730600 |
| C | -1.95084200 | 0.81810500  | 2.32039600  | H          | -1.98554100 | 6.91047500  | 0.26722600  |
| C | -2.04037400 | -0.69318000 | 2.64328900  | H          | 0.12116300  | 5.74213500  | 0.89770800  |
| C | -0.75030900 | -1.53347700 | 2.54537400  | H          | 0.18802500  | 3.28086000  | 0.99235500  |
| P | -0.22862500 | -1.77191800 | 0.77326800  | H          | -4.46372400 | -0.13726800 | 1.18752700  |
| C | 1.24393500  | -2.85935900 | 0.83049800  | H          | -2.31015300 | 1.25791100  | -2.27741500 |
| C | 2.49149600  | -2.27818800 | 1.11611500  | H          | -4.12986900 | 0.43513700  | -3.73028800 |
| C | 3.64982400  | -3.05240500 | 1.11529700  | H          | -6.10177900 | -0.71075300 | -2.73048400 |
| C | 3.57860600  | -4.41699700 | 0.82044700  | H          | -6.24767200 | -0.98309300 | -0.26403800 |
| C | 2.34408400  | -5.00034400 | 0.53132700  | C          | 0.37956500  | -1.00379000 | 3.43385600  |
| C | 1.18000800  | -4.22734300 | 0.53463800  | H          | 1.20164600  | -1.72091900 | 3.49373700  |
| C | -1.57796500 | -2.77294300 | 0.04683400  | H          | 0.78053300  | -0.05742500 | 3.06926800  |
| C | -1.99074200 | -2.46847300 | -1.26011500 | H          | -0.00667200 | -0.85097200 | 4.44783100  |
| C | -2.23404800 | -3.79630700 | 0.74846100  | C          | -3.06661200 | 1.60437700  | 3.02310400  |
| C | -3.28324600 | -4.49651600 | 0.15194800  | H          | -4.06341400 | 1.27470400  | 2.71905700  |
| C | -3.68755900 | -4.18479100 | -1.14849500 | H          | -2.98203100 | 1.45344200  | 4.10447900  |
| C | -3.03801800 | -3.17117100 | -1.85573200 | H          | -2.99070100 | 2.67592000  | 2.82550100  |
| C | -1.87937300 | 3.02412700  | 0.42105100  | Rh         | 0.00513800  | 0.14846300  | -0.58694200 |
| C | -3.06701100 | 3.68678700  | 0.07945600  |            |             |             |             |
| C | -3.10116300 | 5.08152600  | 0.02260000  | $5_{LiRh}$ |             |             |             |
| C | -1.95644200 | 5.82602200  | 0.31459200  | C          | 3.74010700  | 1.05449700  | -0.58704600 |
| C | -0.77394100 | 5.17134400  | 0.66873800  | C          | 4.57256400  | 0.47957600  | -1.55708000 |
| C | -0.73407800 | 3.77832400  | 0.71998400  | C          | 5.88533300  | 0.12122600  | -1.24985200 |
| C | -3.24795800 | 0.62022400  | -0.43611400 | C          | 6.38871800  | 0.32997800  | 0.03562100  |
| C | -4.36947600 | -0.00996600 | 0.11795800  | C          | 5.57109800  | 0.91357200  | 1.00459700  |
| C | -3.17539300 | 0.77301700  | -1.83440700 | C          | 4.26013000  | 1.28056400  | 0.69438700  |
| C | -4.20021900 | 0.30659500  | -2.65429000 | H          | 4.19483700  | 0.30619800  | -2.55934900 |
| C | -5.30779000 | -0.33500600 | -2.09235700 | H          | 6.51256600  | -0.32494500 | -2.01603400 |
| C | -5.38836800 | -0.49026200 | -0.70853100 | H          | 7.40823500  | 0.04510200  | 0.27764800  |
| H | -0.99315000 | 1.19460600  | 2.69966700  | H          | 5.95164600  | 1.08883800  | 2.00663200  |
| H | -2.82608500 | -1.16730600 | 2.05043000  | H          | 3.63706300  | 1.73467600  | 1.45412100  |
| H | -2.36712600 | -0.76589400 | 3.68742200  | C          | 2.32362200  | 1.48345600  | -0.96353800 |
| H | -1.00787300 | -2.53765100 | 2.89961600  | C          | 1.29917100  | 1.31667800  | 0.17425900  |
| H | 2.56161400  | -1.21807900 | 1.32745900  | O          | 1.35583100  | 1.76413000  | 1.29776400  |
| H | 4.60594600  | -2.58434600 | 1.32892300  | H          | 0.46534600  | -1.09157800 | -3.77971100 |

|   |             |             |             |               |             |             |             |
|---|-------------|-------------|-------------|---------------|-------------|-------------|-------------|
| C | 1.67926500  | 0.62499200  | -2.06746900 | C             | -5.30071200 | -1.15390600 | -0.50915500 |
| H | 1.36982600  | 1.12885500  | -2.97783100 | H             | -1.05003100 | 1.18124100  | 2.67729700  |
| H | -0.44985500 | 1.57156500  | -1.53550300 | H             | -2.57165700 | -1.42567900 | 2.16137700  |
| C | 2.30630400  | 2.97861300  | -1.42913900 | H             | -2.07276700 | -0.92079000 | 3.75610900  |
| H | 1.27751500  | 3.20792000  | -1.73444900 | H             | -0.53454500 | -2.51416600 | 2.90513500  |
| H | 2.93862600  | 3.03036600  | -2.32197500 | H             | 2.75503300  | -0.92386300 | 1.33919300  |
| C | 1.63335900  | -0.74393700 | -1.99177700 | H             | 4.90147000  | -2.11427700 | 1.35577500  |
| C | 1.14761300  | -1.62180700 | -3.10847800 | H             | 4.99301900  | -4.53660100 | 0.76940000  |
| H | 2.20513000  | -1.23633400 | -1.21385100 | H             | 2.90026500  | -5.73791100 | 0.17449900  |
| H | 2.00803500  | -1.96452700 | -3.69832200 | H             | 0.74040000  | -4.54866700 | 0.16855800  |
| H | 0.64707900  | -2.51514000 | -2.72694000 | H             | -1.36999800 | -1.74532600 | -1.78853900 |
| C | 2.77228700  | 3.97250700  | -0.40880600 | H             | -1.38069200 | -4.13552700 | 1.79814500  |
| C | 3.88953600  | 4.69130900  | -0.52414300 | H             | -3.12465800 | -5.57767900 | 0.82313300  |
| H | 2.14520500  | 4.09535500  | 0.47188500  | H             | -3.98914100 | -5.12897000 | -1.46260500 |
| H | 4.18651600  | 5.40942900  | 0.23541600  | H             | -3.10074000 | -3.20647600 | -2.76700400 |
| H | 4.54705200  | 4.58637500  | -1.38466800 | H             | -4.34049800 | 2.63324100  | -0.04805300 |
| P | -1.91744100 | 1.02813500  | 0.51449000  | H             | -4.74666700 | 5.06380700  | -0.14636900 |
| C | -1.95415700 | 0.66278500  | 2.33672600  | H             | -2.88995000 | 6.66167100  | 0.27954800  |
| C | -1.82313300 | -0.83442100 | 2.69194700  | H             | -0.61869500 | 5.79929300  | 0.81956800  |
| C | -0.43974700 | -1.49060700 | 2.52593300  | H             | -0.20688200 | 3.36979500  | 0.91303700  |
| P | 0.02229100  | -1.69393000 | 0.72879100  | H             | -4.27630600 | -0.74547800 | 1.32146400  |
| C | 1.58487000  | -2.65429800 | 0.77643200  | H             | -2.68986700 | 1.13745800  | -2.21959000 |
| C | 2.77450700  | -1.98081200 | 1.10448000  | H             | -4.47430700 | 0.08995500  | -3.56487000 |
| C | 3.99361200  | -2.65505300 | 1.10826600  | H             | -6.14693800 | -1.39883500 | -2.47572500 |
| C | 4.04301300  | -4.01093800 | 0.77401900  | H             | -6.03028100 | -1.79580900 | -0.02529900 |
| C | 2.86813000  | -4.68515200 | 0.43881200  | C             | 0.64758500  | -0.78923100 | 3.34882000  |
| C | 1.64351100  | -4.01259000 | 0.43716300  | H             | 1.55070000  | -1.39931900 | 3.41212900  |
| C | -1.24454400 | -2.83678800 | 0.07093000  | H             | 0.92130500  | 0.18240800  | 2.93526100  |
| C | -1.74087500 | -2.59079700 | -1.21822300 | H             | 0.27712200  | -0.63632000 | 4.36854700  |
| C | -1.75297900 | -3.92180300 | 0.80178400  | C             | -3.15335300 | 1.30596600  | 3.05052900  |
| C | -2.73731500 | -4.74134400 | 0.24930100  | H             | -4.10540500 | 0.86200400  | 2.74851900  |
| C | -3.22167400 | -4.48980000 | -1.03686400 | H             | -3.04331800 | 1.15953900  | 4.12982300  |
| C | -2.72079900 | -3.41430900 | -1.77219500 | H             | -3.20623000 | 2.37967700  | 2.86040300  |
| C | -2.23987400 | 2.83005500  | 0.42381000  | Rh            | -0.08680400 | 0.27745600  | -0.67344700 |
| C | -3.52189500 | 3.31954400  | 0.13648200  |               |             |             |             |
| C | -3.75118400 | 4.69558700  | 0.08276400  | $\phi_{L1Rh}$ |             |             |             |
| C | -2.70915200 | 5.59199700  | 0.32421900  | C             | 3.74969200  | 0.99524700  | -0.60537300 |
| C | -1.43376800 | 5.10827500  | 0.62636700  | C             | 4.57302800  | 0.41529100  | -1.58040400 |
| C | -1.19783800 | 3.73500900  | 0.67584900  | C             | 5.88353400  | 0.04408500  | -1.27938600 |
| C | -3.34187100 | 0.26856500  | -0.34972800 | C             | 6.39367300  | 0.24484300  | 0.00480000  |
| C | -4.29794900 | -0.55658300 | 0.25720600  | C             | 5.58505100  | 0.83291600  | 0.97852300  |
| C | -3.41929600 | 0.49400100  | -1.73727700 | C             | 4.27612700  | 1.21259700  | 0.67452300  |
| C | -4.42653400 | -0.09687600 | -2.49631900 | H             | 4.18959200  | 0.24831500  | -2.58158100 |
| C | -5.36698200 | -0.92973400 | -1.88397900 | H             | 6.50376600  | -0.40545700 | -2.04919600 |

|   |             |             |             |                     |             |             |             |
|---|-------------|-------------|-------------|---------------------|-------------|-------------|-------------|
| H | 7.41153200  | -0.04958100 | 0.24198200  | C                   | -1.30954700 | 5.11420900  | 0.85898000  |
| H | 5.97109300  | 1.00196000  | 1.97945100  | C                   | -1.13843300 | 3.73145100  | 0.90054700  |
| H | 3.65995100  | 1.67047300  | 1.43761800  | C                   | -3.34149500 | 0.34782600  | -0.36027600 |
| C | 2.33631800  | 1.43804000  | -0.97850200 | C                   | -4.34693200 | -0.40603300 | 0.25958600  |
| C | 1.31368900  | 1.29089600  | 0.16195400  | C                   | -3.38011600 | 0.51588000  | -1.75751100 |
| O | 1.38069100  | 1.73707400  | 1.28526400  | C                   | -4.40023200 | -0.05780100 | -2.51267900 |
| H | 0.44353000  | -1.14470300 | -3.76529200 | C                   | -5.38942900 | -0.82110800 | -1.88682100 |
| C | 1.67865300  | 0.57717000  | -2.07262300 | C                   | -5.36021100 | -0.99045300 | -0.50268400 |
| H | 1.37963600  | 1.07355400  | -2.99058700 | H                   | -1.02905700 | 1.18443700  | 2.66854700  |
| H | -0.42262900 | 1.55902900  | -1.54692300 | H                   | -2.62001200 | -1.37193400 | 2.12255800  |
| C | 2.33637600  | 2.92986200  | -1.45443500 | H                   | -2.13924800 | -0.89415900 | 3.73203300  |
| H | 1.31186100  | 3.16844600  | -1.76661800 | H                   | -0.61426100 | -2.51057100 | 2.90764300  |
| H | 2.97443500  | 2.96940700  | -2.34373600 | H                   | 2.70316900  | -0.95765600 | 1.36584100  |
| C | 1.61298500  | -0.79051500 | -1.97906600 | H                   | 4.84419600  | -2.15759800 | 1.38591900  |
| C | 1.11754600  | -1.67554700 | -3.08625500 | H                   | 4.92795000  | -4.57703300 | 0.78835200  |
| H | 2.18039800  | -1.28095900 | -1.19699800 | H                   | 2.83270000  | -5.76698100 | 0.17974500  |
| H | 1.97382200  | -2.03723100 | -3.67054500 | H                   | 0.67788700  | -4.56838300 | 0.17077400  |
| H | 0.60354400  | -2.55678900 | -2.69445600 | H                   | -1.43548400 | -1.74393000 | -1.77306700 |
| C | 2.80634400  | 3.92406400  | -0.43617800 | H                   | -1.43597000 | -4.14385100 | 1.80478500  |
| C | 3.93587900  | 4.62461600  | -0.54414500 | H                   | -3.20355500 | -5.56607300 | 0.84389100  |
| H | 2.17047600  | 4.06300300  | 0.43556100  | H                   | -4.09238700 | -5.09749500 | -1.42881500 |
| H | 4.23575800  | 5.34366100  | 0.21329600  | H                   | -3.19805800 | -3.17986400 | -2.73640000 |
| H | 4.60094300  | 4.50310500  | -1.39654500 | H                   | -4.14142700 | 2.79067100  | -0.40842700 |
| P | -1.90013800 | 1.06644300  | 0.50761100  | H                   | -4.42952400 | 5.23691200  | -0.49069900 |
| C | -1.95043700 | 0.69742900  | 2.32806300  | H                   | -2.62012400 | 6.73970800  | 0.31604500  |
| C | -1.86667100 | -0.80490800 | 2.67390800  | H                   | -0.51800700 | 5.76297200  | 1.22176300  |
| C | -0.49535600 | -1.49069300 | 2.52552900  | H                   | -0.21969100 | 3.31612800  | 1.29640600  |
| P | -0.02553100 | -1.70788700 | 0.73249800  | H                   | -4.35351700 | -0.55053100 | 1.33091900  |
| C | 1.52794400  | -2.68074700 | 0.79127000  | H                   | -2.60929500 | 1.10022900  | -2.25053900 |
| C | 2.71878700  | -2.01383100 | 1.12756100  | H                   | -4.41848300 | 0.08615800  | -3.58863700 |
| C | 3.93485800  | -2.69339500 | 1.13316600  | H                   | -6.17829200 | -1.27921900 | -2.47521400 |
| C | 3.97996800  | -4.04785300 | 0.79247900  | H                   | -6.12763400 | -1.57800900 | -0.00859700 |
| C | 2.80375700  | -4.71560200 | 0.44952900  | C                   | 0.59966400  | -0.80908500 | 3.35436600  |
| C | 1.58195300  | -4.03778000 | 0.44629800  | H                   | 1.48700900  | -1.44043300 | 3.43081300  |
| C | -1.30566100 | -2.84002600 | 0.08078700  | H                   | 0.90182300  | 0.15268300  | 2.93697200  |
| C | -1.81297100 | -2.58589200 | -1.20164400 | H                   | 0.22290500  | -0.63957800 | 4.36913000  |
| C | -1.81684100 | -3.92298400 | 0.81330600  | C                   | -3.12431700 | 1.37668100  | 3.04995600  |
| C | -2.81516100 | -4.73099100 | 0.26911700  | H                   | -4.08925100 | 0.93892700  | 2.78274900  |
| C | -3.31300500 | -4.46853300 | -1.00977600 | H                   | -2.99109200 | 1.25628200  | 4.12985700  |
| C | -2.80911700 | -3.39560500 | -1.74680200 | H                   | -3.16669200 | 2.44583100  | 2.83329300  |
| C | -2.15222600 | 2.88015500  | 0.43284200  | Rh                  | -0.08885400 | 0.26302100  | -0.67668800 |
| C | -3.34170700 | 3.43333500  | -0.05968500 |                     |             |             |             |
| C | -3.50484100 | 4.81958500  | -0.10371300 | TS6 <sub>LIRh</sub> |             |             |             |
| C | -2.49051200 | 5.66241000  | 0.35155900  | C                   | -3.65612800 | 1.33181200  | -0.80541700 |

|   |             |             |             |   |             |             |             |
|---|-------------|-------------|-------------|---|-------------|-------------|-------------|
| C | -4.58381700 | 1.93570800  | 0.05061200  | C | 5.44238900  | -1.60642400 | 0.17010400  |
| C | -5.82294800 | 1.33973200  | 0.29812800  | C | 5.28830000  | -2.15185200 | -1.10609200 |
| C | -6.15189400 | 0.12318100  | -0.30060600 | C | 4.18025300  | -1.80383800 | -1.88102200 |
| C | -5.22182600 | -0.50335900 | -1.13213800 | C | -2.04434500 | -2.24099400 | 0.75564300  |
| C | -3.98333900 | 0.08949400  | -1.37259800 | C | -2.47438100 | -3.42497800 | 0.14259800  |
| H | -4.34252700 | 2.88609600  | 0.51293600  | C | -3.78607300 | -3.87256000 | 0.31825700  |
| H | -6.53320300 | 1.83432400  | 0.95462900  | C | -4.67363800 | -3.15401400 | 1.11930400  |
| H | -7.11695000 | -0.33811700 | -0.11304200 | C | -4.25105900 | -1.97120000 | 1.73080700  |
| H | -5.45138800 | -1.46416000 | -1.58230500 | C | -2.95060300 | -1.50884400 | 1.54297400  |
| H | -3.27044200 | -0.42986000 | -2.00353200 | C | 0.62776200  | -2.96915900 | -0.21405000 |
| C | -2.28406200 | 1.98402200  | -1.08312400 | C | 1.61496500  | -3.74746800 | 0.40593800  |
| C | -1.29844500 | 1.29332100  | -0.05061100 | C | 0.40969900  | -3.12795300 | -1.59614900 |
| O | -1.51068500 | 1.42527900  | 1.13598500  | C | 1.15120400  | -4.04974700 | -2.33286600 |
| H | -2.46746200 | 6.12293700  | -0.58499800 | C | 2.14127000  | -4.81093400 | -1.70638600 |
| C | -2.32858200 | 3.48710700  | -0.83312000 | C | 2.37046600  | -4.65532500 | -0.33904500 |
| H | -2.84888600 | 4.01959900  | -1.62982600 | H | -0.48357000 | -0.69535400 | 2.75431000  |
| H | -0.94300200 | -0.21959600 | -1.90932600 | H | 2.32887100  | -1.72842200 | 2.15777400  |
| C | -1.86910900 | 1.75921300  | -2.57182500 | H | 1.80797800  | -1.20388500 | 3.73983900  |
| H | -1.79433700 | 2.72720600  | -3.07462800 | H | 3.03573000  | 0.54163400  | 2.71640800  |
| H | -2.64091000 | 1.19907400  | -3.09656600 | H | 0.74177600  | 3.31981900  | 0.52674900  |
| C | -1.84158800 | 4.20295500  | 0.18358100  | H | 1.54559300  | 5.64989400  | 0.43226200  |
| C | -1.94734300 | 5.69631000  | 0.27825400  | H | 3.98281400  | 6.11911100  | 0.22958500  |
| H | -1.34555000 | 3.70540100  | 1.01133500  | H | 5.59930200  | 4.23312300  | 0.14096100  |
| H | -2.48607200 | 5.99301900  | 1.18724900  | H | 4.79962400  | 1.90161000  | 0.26367700  |
| H | -0.95280000 | 6.15621800  | 0.34278200  | H | 2.36500200  | -0.66549900 | -1.98880600 |
| C | -0.54030500 | 1.04897300  | -2.74170600 | H | 4.62703000  | -0.30844900 | 1.66871400  |
| C | 0.64242200  | 1.67728900  | -2.25808100 | H | 6.30322700  | -1.87153600 | 0.77646700  |
| H | -0.45060000 | 0.41293200  | -3.62074500 | H | 6.02691600  | -2.84687200 | -1.49378000 |
| H | 1.59799000  | 1.42740200  | -2.71145500 | H | 4.04891800  | -2.23005400 | -2.87044900 |
| H | 0.57318900  | 2.67721700  | -1.84175100 | H | -1.78966000 | -4.01057600 | -0.46002400 |
| P | -0.31770000 | -1.63618900 | 0.61369200  | H | -4.10517800 | -4.79308400 | -0.16170000 |
| C | 0.17338500  | -1.50194000 | 2.41191300  | H | -5.68974200 | -3.50896600 | 1.26234900  |
| C | 1.63059900  | -1.06071900 | 2.66718300  | H | -4.93931700 | -1.39742100 | 2.34317500  |
| C | 2.00618100  | 0.40388600  | 2.36830700  | H | -2.64457200 | -0.57913600 | 2.00843100  |
| P | 2.05301400  | 0.74262400  | 0.54056400  | H | 1.81467700  | -3.65165100 | 1.46384900  |
| C | 2.71266800  | 2.44634300  | 0.41621700  | H | -0.34046400 | -2.52058100 | -2.09360700 |
| C | 1.80441000  | 3.51598400  | 0.45605900  | H | 0.96443100  | -4.16303300 | -3.39655800 |
| C | 2.25957500  | 4.83229000  | 0.39712500  | H | 2.73212700  | -5.51726900 | -2.28149800 |
| C | 3.62745000  | 5.09442300  | 0.28317000  | H | 3.13980800  | -5.24067700 | 0.15519700  |
| C | 4.53554000  | 4.03506500  | 0.23323500  | C | 1.12646400  | 1.41783000  | 3.10888900  |
| C | 4.08347300  | 2.71527100  | 0.30249600  | H | 1.53777700  | 2.42699200  | 3.02692500  |
| C | 3.37069500  | -0.36541700 | -0.09381000 | H | 0.10736100  | 1.43477600  | 2.72063000  |
| C | 3.22717700  | -0.91798700 | -1.37855800 | H | 1.09171600  | 1.15430000  | 4.17187400  |
| C | 4.49067400  | -0.71961300 | 0.67484400  | C | -0.16896200 | -2.75253100 | 3.23754900  |

|            |             |             |             |   |             |             |             |
|------------|-------------|-------------|-------------|---|-------------|-------------|-------------|
| H          | 0.47375500  | -3.60130700 | 2.99314500  | C | 0.96080400  | 5.21516700  | 0.33496900  |
| H          | -0.02831400 | -2.52449200 | 4.29934800  | C | 2.23233000  | 5.76961200  | 0.16945300  |
| H          | -1.20583600 | -3.06205500 | 3.09503900  | C | 3.35024800  | 4.93675800  | 0.11225900  |
| Rh         | 0.14332200  | 0.21223300  | -0.77730400 | C | 3.20204600  | 3.55300700  | 0.22218900  |
|            |             |             |             | C | 3.26701800  | 0.44226700  | -0.02654900 |
| $7_{LIRh}$ |             |             |             | C | 3.31509800  | -0.13058700 | -1.30645600 |
| C          | -4.02921200 | 0.82128900  | -0.65190100 | C | 4.42055900  | 0.41231600  | 0.77302000  |
| C          | -5.14528600 | 1.58977800  | -0.31083400 | C | 5.59310500  | -0.17446600 | 0.29722000  |
| C          | -6.37628100 | 0.98161200  | -0.04426700 | C | 5.63000200  | -0.73798500 | -0.97985400 |
| C          | -6.50934300 | -0.40408000 | -0.11228900 | C | 4.48842200  | -0.71478900 | -1.78232600 |
| C          | -5.39919600 | -1.18169700 | -0.45344900 | C | -1.28444200 | -2.92965200 | 0.57029900  |
| C          | -4.17670700 | -0.57263100 | -0.72326300 | C | -1.27849400 | -4.17859400 | -0.06750900 |
| H          | -5.06256400 | 2.66800900  | -0.25787700 | C | -2.39480000 | -5.01404600 | 0.00463900  |
| H          | -7.23139100 | 1.59971400  | 0.21415500  | C | -3.52220200 | -4.62245100 | 0.72791800  |
| H          | -7.46505100 | -0.87566800 | 0.09656000  | C | -3.53326000 | -3.38213800 | 1.36959400  |
| H          | -5.48147100 | -2.26274600 | -0.50324900 | C | -2.42917400 | -2.53524800 | 1.28402500  |
| H          | -3.32165000 | -1.18881800 | -0.98481900 | C | 1.51503300  | -2.79247600 | -0.21016200 |
| C          | -2.66382500 | 1.42833800  | -1.02323200 | C | 2.63396500  | -3.27345500 | 0.48250300  |
| C          | -1.57696200 | 0.80321600  | -0.02608600 | C | 1.43699300  | -3.00936000 | -1.59957100 |
| O          | -1.85240200 | 0.71316100  | 1.14904900  | C | 2.44020800  | -3.70404600 | -2.27179600 |
| H          | -2.48228200 | 5.55870400  | -0.34128400 | C | 3.55627100  | -4.16881400 | -1.57166700 |
| C          | -2.58308600 | 2.93456300  | -0.78203800 | C | 3.65039600  | -3.94760900 | -0.19781800 |
| H          | -2.41149400 | 3.54042000  | -1.66928400 | H | -0.42041300 | -0.92106900 | 2.62034100  |
| H          | -0.82629500 | -0.31821400 | -2.32633400 | H | 2.59996000  | -1.09628700 | 2.21090200  |
| C          | -2.39038000 | 1.10830400  | -2.51964000 | H | 1.87020900  | -0.74101400 | 3.75812400  |
| H          | -2.69453800 | 1.96800300  | -3.12447300 | H | 2.62355900  | 1.26588400  | 2.72465600  |
| H          | -3.01300200 | 0.26855500  | -2.83088800 | H | -0.18601200 | 3.41011400  | 0.54452200  |
| C          | -2.73209300 | 3.54633000  | 0.39697000  | H | 0.08783600  | 5.85776900  | 0.37348500  |
| C          | -2.70716800 | 5.03108000  | 0.59046500  | H | 2.34947300  | 6.84549400  | 0.08113000  |
| H          | -2.89688300 | 2.94593600  | 1.28958600  | H | 4.34125100  | 5.36042200  | -0.02018100 |
| H          | -3.67630900 | 5.38801800  | 0.96239300  | H | 4.07880000  | 2.91808600  | 0.17096000  |
| H          | -1.96361800 | 5.31589900  | 1.34434800  | H | 2.42922300  | -0.13764800 | -1.93336600 |
| C          | -0.93904600 | 0.75927400  | -2.81834100 | H | 4.41424100  | 0.84737100  | 1.76620400  |
| C          | 0.09080300  | 1.67548700  | -2.26675900 | H | 6.47791400  | -0.19042500 | 0.92620000  |
| H          | -0.77828500 | 0.45338300  | -3.85761400 | H | 6.54287300  | -1.19763800 | -1.34582900 |
| H          | 1.03742500  | 1.71503700  | -2.80778100 | H | 4.50419900  | -1.16301000 | -2.77016000 |
| H          | -0.24032400 | 2.65569300  | -1.93740100 | H | -0.40187800 | -4.51066600 | -0.61089200 |
| P          | 0.16394400  | -1.79595300 | 0.53005000  | H | -2.37355100 | -5.97853200 | -0.49410800 |
| C          | 0.46492600  | -1.50855600 | 2.35396600  | H | -4.38494900 | -5.27854600 | 0.79264200  |
| C          | 1.71362400  | -0.65855200 | 2.67586800  | H | -4.40721200 | -3.06370500 | 1.92881000  |
| C          | 1.67278500  | 0.85137400  | 2.37036600  | H | -2.46391100 | -1.56753000 | 1.77095300  |
| P          | 1.68818100  | 1.18243300  | 0.54310900  | H | 2.73246100  | -3.12497300 | 1.54911400  |
| C          | 1.92788800  | 2.99139000  | 0.38908400  | H | 0.58045800  | -2.63880500 | -2.15592400 |
| C          | 0.80609800  | 3.83311700  | 0.43963000  | H | 2.35598800  | -3.87178100 | -3.34135100 |



|                     |             |             |             |   |             |             |             |
|---------------------|-------------|-------------|-------------|---|-------------|-------------|-------------|
| H                   | 4.34794700  | -4.69612900 | -2.09490000 | P | 1.23986400  | -1.50565000 | 0.40547300  |
| H                   | 4.51613600  | -4.30247300 | 0.35292800  | C | 0.95549900  | -1.35974700 | 2.24020300  |
| C                   | 0.55215100  | 1.60140600  | 3.09851300  | C | 1.12905500  | 0.05919900  | 2.81986800  |
| H                   | 0.66885900  | 2.68254100  | 2.98813600  | C | 0.19920700  | 1.18045600  | 2.31039100  |
| H                   | -0.43521100 | 1.32594700  | 2.72963700  | P | 0.56469600  | 1.56625700  | 0.53695100  |
| H                   | 0.60372300  | 1.36802900  | 4.16765600  | C | -0.23554800 | 3.16934100  | 0.12994600  |
| C                   | 0.45385500  | -2.78968500 | 3.20159600  | C | -0.02546300 | 3.67728500  | -1.16277600 |
| H                   | 1.34552000  | -3.39914600 | 3.03750100  | C | -0.48205400 | 4.94840500  | -1.50482000 |
| H                   | 0.43012700  | -2.51565200 | 4.26174400  | C | -1.18008400 | 5.71735900  | -0.56996500 |
| H                   | -0.42083700 | -3.40880600 | 2.99497100  | C | -1.40618300 | 5.21211400  | 0.71102000  |
| Rh                  | 0.10925000  | 0.19687000  | -0.80560400 | C | -0.92725900 | 3.94885100  | 1.06683800  |
|                     |             |             |             | C | 2.31822000  | 2.12375300  | 0.50952100  |
|                     |             |             |             | C | 3.00575100  | 2.09796000  | -0.71130300 |
| TS7 <sub>LIRh</sub> |             |             |             | C | 2.94808900  | 2.66917200  | 1.63753300  |
| C                   | -4.15492400 | -0.46915600 | 0.23418800  | C | 4.25222700  | 3.15778200  | 1.54678700  |
| C                   | -4.70134500 | 0.71890300  | 0.74150300  | C | 4.93313800  | 3.12218600  | 0.32846900  |
| C                   | -5.66391200 | 0.70142100  | 1.75543200  | C | 4.30428300  | 2.59731300  | -0.80254100 |
| C                   | -6.10770400 | -0.50933200 | 2.28436600  | C | 1.04667500  | -3.29980600 | 0.04313100  |
| C                   | -5.58083800 | -1.70293900 | 1.78336200  | C | 1.77668500  | -3.89420900 | -0.99796100 |
| C                   | -4.61893500 | -1.68163500 | 0.77498100  | C | 1.58451200  | -5.23677700 | -1.32472100 |
| H                   | -4.38720200 | 1.67612600  | 0.34325400  | C | 0.66738600  | -6.00938800 | -0.61076500 |
| H                   | -6.06683300 | 1.64048200  | 2.12448200  | C | -0.05357600 | -5.43035400 | 0.43528300  |
| H                   | -6.85652600 | -0.52609300 | 3.07102900  | C | 0.12838400  | -4.08610300 | 0.75907400  |
| H                   | -5.91928200 | -2.65649800 | 2.17938500  | C | 2.97349300  | -1.15104600 | -0.05665400 |
| H                   | -4.21886600 | -2.62035000 | 0.41359200  | C | 4.02222600  | -1.01979800 | 0.86215800  |
| C                   | -3.09337100 | -0.46815500 | -0.87001000 | C | 3.24595800  | -1.00940900 | -1.42928700 |
| C                   | -1.76423000 | -1.18087600 | -0.35265100 | C | 4.54608200  | -0.78316700 | -1.87464200 |
| O                   | -1.80651000 | -1.92081900 | 0.63336500  | C | 5.58684800  | -0.65772900 | -0.95166300 |
| H                   | -2.66323000 | 3.54288100  | -1.98989500 | C | 5.31964300  | -0.76425300 | 0.41389400  |
| C                   | -2.79683200 | 0.95509300  | -1.31099100 | H | -0.10579900 | -1.62215000 | 2.28681200  |
| H                   | -2.41573000 | 1.61213100  | -0.53220900 | H | 2.17394900  | 0.36307700  | 2.72238400  |
| H                   | -2.00948700 | -0.81755500 | -3.53731900 | H | 0.93846000  | -0.03268000 | 3.89586800  |
| C                   | -3.49980400 | -1.37879500 | -2.05196500 | H | 0.44453000  | 2.07852500  | 2.88699100  |
| H                   | -4.30742800 | -0.93015900 | -2.63788200 | H | 0.50442200  | 3.08316000  | -1.90122800 |
| H                   | -3.88075000 | -2.32158000 | -1.65117100 | H | -0.30795300 | 5.33079500  | -2.50590500 |
| C                   | -3.05831100 | 1.48807900  | -2.51271800 | H | -1.54398500 | 6.70432200  | -0.83880600 |
| C                   | -2.92220900 | 2.93832800  | -2.85942500 | H | -1.94282700 | 5.80564600  | 1.44516700  |
| H                   | -3.45137900 | 0.85829500  | -3.30715800 | H | -1.08170400 | 3.59542600  | 2.07893400  |
| H                   | -2.16150300 | 3.10023800  | -3.63405800 | H | 2.52776300  | 1.67796600  | -1.58943100 |
| H                   | -3.86825700 | 3.31081100  | -3.27259200 | H | 2.43055500  | 2.72412600  | 2.58871800  |
| C                   | -2.24536600 | -1.66441800 | -2.88854800 | H | 4.73248200  | 3.57029200  | 2.42908900  |
| C                   | -1.08867800 | -1.92750600 | -1.93191600 | H | 5.94823000  | 3.50164000  | 0.26030500  |
| H                   | -2.40913200 | -2.53189300 | -3.53870300 | H | 4.82853200  | 2.56210800  | -1.75228400 |
| H                   | -0.11833200 | -1.73711300 | -2.41972500 | H | 2.50204300  | -3.31910200 | -1.55898000 |
| H                   | -1.04849900 | -2.94664400 | -1.55495200 |   |             |             |             |

|                 |             |             |             |   |             |             |             |
|-----------------|-------------|-------------|-------------|---|-------------|-------------|-------------|
| H               | 2.15929400  | -5.67712700 | -2.13392700 | C | -1.99581900 | -3.55484000 | 2.62084600  |
| H               | 0.52032700  | -7.05532800 | -0.86278000 | C | -0.87444600 | -2.76479200 | 2.37367600  |
| H               | -0.76363900 | -6.02391900 | 1.00336500  | C | 2.13526800  | -2.55939000 | -0.51775200 |
| H               | -0.45797500 | -3.65287200 | 1.55579600  | C | 2.52792900  | -3.89939600 | -0.35442700 |
| H               | 3.84002200  | -1.10548500 | 1.92440100  | C | 2.48905700  | -1.88613800 | -1.69427300 |
| H               | 2.43327500  | -1.07085100 | -2.14766000 | C | 3.25558500  | -2.51871300 | -2.67427800 |
| H               | 4.74246100  | -0.68545700 | -2.93801800 | C | 3.66290700  | -3.84077900 | -2.49298700 |
| H               | 6.59898600  | -0.46603900 | -1.29459900 | C | 3.28919800  | -4.53163800 | -1.33647200 |
| H               | 6.12180900  | -0.65223300 | 1.13692200  | H | 1.50374700  | -1.21289700 | 3.04784600  |
| C               | -1.28383700 | 0.85022900  | 2.53012700  | H | 3.97353200  | -0.95995200 | 1.27282100  |
| H               | -1.93967500 | 1.66530800  | 2.21866400  | H | 4.02156900  | -0.78790300 | 3.01547300  |
| H               | -1.58623600 | -0.04378500 | 1.98699600  | H | 3.99103700  | 1.40400800  | 2.06863500  |
| H               | -1.45343200 | 0.67580800  | 3.59863100  | H | -0.23469000 | 2.83105700  | -0.02114000 |
| C               | 1.74090400  | -2.36445500 | 3.10184600  | H | -0.76307100 | 5.24885700  | 0.11008400  |
| H               | 2.75115300  | -2.00962200 | 3.31745000  | H | 0.99242600  | 6.86547200  | 0.80862100  |
| H               | 1.22397000  | -2.47956700 | 4.06017600  | H | 3.27784900  | 6.05890300  | 1.35239200  |
| H               | 1.81787900  | -3.35097400 | 2.64258700  | H | 3.81468600  | 3.64557300  | 1.20111300  |
| Rh              | -0.08119100 | -0.17759300 | -0.82761300 | H | 1.99776200  | 1.74141900  | -2.33621200 |
|                 |             |             |             | H | 5.16877200  | 0.73416100  | 0.40549600  |
|                 |             |             |             | H | 6.75409100  | 0.63978400  | -1.46640200 |
| $\delta_{L1Rh}$ |             |             |             | H | 5.99226300  | 1.10216200  | -3.78585200 |
| C               | -2.65493400 | -0.12371500 | -0.51759600 | H | 3.60853400  | 1.67963400  | -4.21105100 |
| O               | -2.22320100 | -0.28262800 | 0.62261800  | H | -0.25365300 | -3.71545300 | -0.83819000 |
| H               | -4.72828500 | 4.96424000  | 1.01313000  | H | -2.24764300 | -5.10218100 | -0.39983600 |
| P               | 1.14939400  | -1.67554000 | 0.75350800  | H | -3.37295200 | -5.00685400 | 1.81633500  |
| C               | 2.19081100  | -1.61998700 | 2.29996400  | H | -2.48280100 | -3.50894900 | 3.59023700  |
| C               | 3.37735300  | -0.65186100 | 2.13854100  | H | -0.51202300 | -2.09934800 | 3.15002700  |
| C               | 3.04417600  | 0.85328300  | 2.06494000  | H | 2.22302500  | -4.45636200 | 0.52333700  |
| P               | 2.17799000  | 1.28093400  | 0.48283900  | H | 2.15719500  | -0.86624700 | -1.83647600 |
| C               | 1.82082500  | 3.07664500  | 0.59436000  | H | 3.52972900  | -1.97668200 | -3.57419100 |
| C               | 0.53507100  | 3.53814500  | 0.28184600  | H | 4.25853100  | -4.33719400 | -3.25324200 |
| C               | 0.23550400  | 4.89968900  | 0.35518600  | H | 3.58637700  | -5.56719000 | -1.20085000 |
| C               | 1.22272200  | 5.80629500  | 0.74597400  | C | 2.20770000  | 1.32860500  | 3.26077300  |
| C               | 2.50957200  | 5.35265200  | 1.05254900  | H | 2.17402900  | 2.41929900  | 3.31008600  |
| C               | 2.81154900  | 3.99384300  | 0.97207300  | H | 1.17652000  | 0.96532100  | 3.20396100  |
| C               | 3.46189600  | 1.23601700  | -0.83083000 | H | 2.65022900  | 0.95852300  | 4.19186400  |
| C               | 3.04201300  | 1.50901300  | -2.14380600 | C | 2.68367900  | -2.98644900 | 2.78787900  |
| C               | 4.80865700  | 0.93312500  | -0.59678700 | H | 3.47070400  | -3.38053400 | 2.13984900  |
| C               | 5.71373400  | 0.88286100  | -1.66052200 | H | 3.10422900  | -2.87469600 | 3.79300600  |
| C               | 5.28671900  | 1.14487900  | -2.96173000 | H | 1.87639500  | -3.72129900 | 2.84084300  |
| C               | 3.94696000  | 1.46762300  | -3.20127100 | C | -5.06007900 | 0.37330700  | -0.79975100 |
| C               | -0.22916200 | -2.82043100 | 1.12869100  | C | -5.40786200 | -0.30980700 | 0.37592700  |
| C               | -0.73696000 | -3.66638000 | 0.13153200  | C | -6.68634100 | -0.84107400 | 0.54336800  |
| C               | -1.86473700 | -4.44981800 | 0.37931100  | C | -7.64377500 | -0.69591800 | -0.46253800 |
| C               | -2.49593600 | -4.39639000 | 1.62365200  |   |             |             |             |

|            |             |             |             |   |             |             |             |
|------------|-------------|-------------|-------------|---|-------------|-------------|-------------|
| C          | -7.31033100 | -0.01300800 | -1.63260100 | H | -1.65570600 | -3.78070400 | -0.77372500 |
| C          | -6.02876200 | 0.51547000  | -1.80051700 | C | -2.53012300 | -2.20998100 | 1.08437800  |
| H          | -4.67549300 | -0.41919500 | 1.16882800  | H | -2.84885600 | -3.24482900 | 1.24046500  |
| H          | -6.93303500 | -1.36730200 | 1.46080700  | H | -3.21363000 | -1.56221900 | 1.64376700  |
| H          | -8.63971500 | -1.10947900 | -0.33527500 | C | -0.23226800 | -2.23379700 | -1.25274500 |
| H          | -8.04672900 | 0.11049200  | -2.42132200 | C | 0.13586600  | -1.20410500 | -2.20193800 |
| H          | -5.79635200 | 1.04290400  | -2.71821600 | H | 0.54938700  | -2.92058700 | -0.94886800 |
| C          | -3.65265400 | 0.97677800  | -0.93360400 | H | 1.15825100  | -1.22519700 | -2.57690300 |
| C          | -3.20591500 | 1.18240500  | -2.40609000 | H | -0.60091300 | -0.95171100 | -2.96731800 |
| H          | -2.28393400 | 1.77770500  | -2.39604700 | C | -1.13920800 | -2.04022700 | 1.62725400  |
| H          | -3.93442600 | 1.73360100  | -3.00206500 | C | -0.36480800 | -3.02512800 | 2.09510900  |
| C          | -3.45848800 | 2.22527300  | -0.10691000 | H | -0.77304200 | -0.99604800 | 1.79891700  |
| H          | -2.25969600 | -0.21170800 | -3.81975500 | H | 0.63251700  | -2.83647000 | 2.47326300  |
| H          | -2.44278500 | 2.62072100  | -0.13605300 | H | -0.71786400 | -4.05363300 | 2.11953100  |
| C          | -2.89790100 | -0.23097500 | -2.93312500 | P | 2.30722700  | -0.55073600 | 0.39658600  |
| C          | -2.22332800 | -0.92276100 | -1.73783800 | C | 2.92495400  | 0.37719900  | 1.89414100  |
| H          | -3.82469000 | -0.74662700 | -3.19899300 | C | 2.44038100  | 1.83945700  | 1.89673300  |
| H          | -1.12444300 | -0.87493300 | -1.79281100 | C | 0.95473200  | 2.11170800  | 2.21725700  |
| H          | -2.48565200 | -1.97604200 | -1.60173400 | P | -0.20966700 | 1.77130500  | 0.79936900  |
| C          | -4.37937200 | 2.87985200  | 0.60344100  | C | -1.81223500 | 2.37741600  | 1.46090100  |
| C          | -4.10958200 | 4.13458800  | 1.37851500  | C | -2.66823200 | 1.48811100  | 2.12511500  |
| H          | -5.39875900 | 2.49974500  | 0.63788700  | C | -3.87053000 | 1.93482300  | 2.67111400  |
| H          | -3.05863400 | 4.43450900  | 1.31312000  | C | -4.23447400 | 3.27844800  | 2.55330300  |
| H          | -4.36266100 | 4.00168100  | 2.43804800  | C | -3.38732700 | 4.17112300  | 1.89431700  |
| Rh         | 0.27508300  | 0.24050800  | 0.16537100  | C | -2.18112800 | 3.72500600  | 1.35143200  |
|            |             |             |             | C | 0.19636400  | 3.00531700  | -0.49536400 |
|            |             |             |             | C | -0.38526800 | 2.82626900  | -1.76245600 |
| $9_{L1Rh}$ |             |             |             | C | 1.06420700  | 4.08541100  | -0.28916600 |
| C          | -4.06915300 | -1.99608300 | -0.95096700 | C | 1.37505400  | 4.94999400  | -1.34199200 |
| C          | -4.32790200 | -1.69468700 | -2.29878500 | C | 0.80887100  | 4.75564600  | -2.60186400 |
| C          | -5.61797800 | -1.75963300 | -2.81891200 | C | -0.08259300 | 3.69779300  | -2.80673000 |
| C          | -6.68776800 | -2.12982700 | -1.99920400 | C | 2.90405200  | -2.26791200 | 0.63234300  |
| C          | -6.44750400 | -2.43190600 | -0.66012600 | C | 3.01109900  | -3.10773300 | -0.48994900 |
| C          | -5.15122900 | -2.36289900 | -0.14057700 | C | 3.33227600  | -4.45643100 | -0.34124300 |
| H          | -3.50975400 | -1.40010800 | -2.94823700 | C | 3.55036800  | -4.99008800 | 0.93150000  |
| H          | -5.78930900 | -1.51822300 | -3.86403900 | C | 3.45248900  | -4.16376300 | 2.05165600  |
| H          | -7.69498300 | -2.18174500 | -2.40184000 | C | 3.13038400  | -2.81290900 | 1.90507900  |
| H          | -7.26790300 | -2.72391600 | -0.01084400 | C | 3.35689600  | 0.08654900  | -0.97086000 |
| H          | -5.00013500 | -2.60437700 | 0.90493200  | C | 4.65089200  | -0.40679000 | -1.20683800 |
| C          | -2.64624500 | -1.87900700 | -0.42638500 | C | 2.87732800  | 1.13615400  | -1.76892200 |
| C          | -2.09130800 | -0.42056800 | -0.58486300 | C | 3.67069400  | 1.68225500  | -2.77951200 |
| O          | -2.73303100 | 0.49519000  | -1.04759800 | C | 4.95202600  | 1.18029600  | -3.01049900 |
| H          | 0.17813200  | -0.03265400 | -1.66740400 | C | 5.43907800  | 0.13473500  | -2.22167100 |
| C          | -1.65216400 | -2.78453100 | -1.22489100 | H | 2.47596700  | -0.14502900 | 2.74415100  |
| H          | -2.01208800 | -2.89470200 | -2.25154100 |   |             |             |             |

|                     |             |             |             |   |             |             |             |
|---------------------|-------------|-------------|-------------|---|-------------|-------------|-------------|
| H                   | 2.72951400  | 2.31644000  | 0.95502400  | H | 4.88010100  | -2.62581300 | -1.06099800 |
| H                   | 3.01542500  | 2.35217300  | 2.67758300  | C | 2.62280900  | -1.90722400 | 0.39913600  |
| H                   | 0.86142300  | 3.18447800  | 2.42135700  | C | 1.99320500  | -0.50817800 | 0.63397300  |
| H                   | -2.39569000 | 0.44394700  | 2.21428800  | O | 2.53908300  | 0.39053900  | 1.24078000  |
| H                   | -4.52544700 | 1.23320300  | 3.17915800  | H | 0.02474700  | -0.55917000 | 2.33575000  |
| H                   | -5.17455500 | 3.62667900  | 2.97039500  | C | 1.70318200  | -2.86269000 | 1.22853500  |
| H                   | -3.66465600 | 5.21671400  | 1.79857200  | H | 2.02953400  | -2.84280000 | 2.27220400  |
| H                   | -1.53360000 | 4.42681800  | 0.83698200  | H | 1.85496000  | -3.88447000 | 0.86658400  |
| H                   | -1.07808900 | 2.00573600  | -1.91921900 | C | 2.41875300  | -2.08140500 | -1.12525000 |
| H                   | 1.50939200  | 4.26053100  | 0.68294100  | H | 2.65727200  | -3.10899000 | -1.42588000 |
| H                   | 2.05988900  | 5.77546300  | -1.17287600 | H | 3.10413300  | -1.41460400 | -1.65136200 |
| H                   | 1.05498900  | 5.42690800  | -3.41898900 | C | 0.21008700  | -2.48866200 | 1.18012500  |
| H                   | -0.53801200 | 3.54924400  | -3.78135600 | C | -0.29947200 | -1.61179300 | 2.33444400  |
| H                   | 2.85502000  | -2.70253900 | -1.48477800 | H | -0.42701100 | -3.36865400 | 1.17421800  |
| H                   | 3.41407700  | -5.08890600 | -1.22015800 | H | -1.38714300 | -1.63370700 | 2.39741200  |
| H                   | 3.80038300  | -6.04020900 | 1.04741600  | H | 0.10849000  | -2.03391600 | 3.26439900  |
| H                   | 3.62799500  | -4.56718200 | 3.04443400  | C | 0.97660100  | -1.76236300 | -1.48499000 |
| H                   | 3.05788200  | -2.19255900 | 2.79147500  | C | 0.02895000  | -2.67093000 | -0.91031900 |
| H                   | 5.04344400  | -1.21604600 | -0.60196900 | H | 0.77989700  | -1.36403400 | -2.47607500 |
| H                   | 1.88505400  | 1.53347500  | -1.60359700 | H | -0.98464600 | -2.69618600 | -1.28291300 |
| H                   | 3.28100600  | 2.49587100  | -3.38352500 | H | 0.39067300  | -3.65961300 | -0.65387800 |
| H                   | 5.56865800  | 1.59945800  | -3.79990600 | P | -2.39813500 | -0.45253900 | -0.44775100 |
| H                   | 6.43649000  | -0.25893400 | -2.39325700 | C | -2.95127300 | 0.53165700  | -1.93229700 |
| C                   | 0.48384100  | 1.35712000  | 3.46791000  | C | -2.31907200 | 1.93605500  | -1.93039100 |
| H                   | -0.47771100 | 1.73390800  | 3.82200200  | C | -0.81597300 | 2.05458200  | -2.26569900 |
| H                   | 0.37561200  | 0.28383900  | 3.28180000  | P | 0.30993100  | 1.63835900  | -0.83567800 |
| H                   | 1.21460700  | 1.48517000  | 4.27363900  | C | 1.96914300  | 2.13641800  | -1.45164300 |
| C                   | 4.45099100  | 0.33936100  | 2.04102100  | C | 2.67530200  | 1.27362100  | -2.30417300 |
| H                   | 4.93307500  | 0.93951200  | 1.26436000  | C | 3.93531800  | 1.62550100  | -2.78610400 |
| H                   | 4.73314200  | 0.75668600  | 3.01355200  | C | 4.51046600  | 2.84475600  | -2.41884300 |
| H                   | 4.84998400  | -0.67566500 | 1.98058200  | C | 3.81194100  | 3.71221700  | -1.57796500 |
| Rh                  | -0.13175400 | -0.44611700 | -0.06829800 | C | 2.54738000  | 3.36333800  | -1.09826400 |
|                     |             |             |             | C | -0.05746900 | 2.91979800  | 0.43338200  |
|                     |             |             |             | C | 0.43713800  | 2.72873000  | 1.73479900  |
|                     |             |             |             | C | -0.80840300 | 4.07118300  | 0.15702500  |
|                     |             |             |             | C | -1.08519000 | 4.99457300  | 1.16774600  |
|                     |             |             |             | C | -0.60614900 | 4.78735400  | 2.46157100  |
|                     |             |             |             | C | 0.16570200  | 3.65615400  | 2.73975400  |
|                     |             |             |             | C | -3.20595500 | -2.08525300 | -0.64711100 |
|                     |             |             |             | C | -3.44157700 | -2.87303700 | 0.49266500  |
|                     |             |             |             | C | -3.92428200 | -4.17493800 | 0.36692700  |
|                     |             |             |             | C | -4.17439700 | -4.71354600 | -0.89822000 |
|                     |             |             |             | C | -3.93954200 | -3.94058100 | -2.03609900 |
|                     |             |             |             | C | -3.45488300 | -2.63624800 | -1.91404800 |
| TS8 <sub>L1Rh</sub> |             |             |             |   |             |             |             |
| C                   | 4.06845100  | -2.01612500 | 0.84789800  |   |             |             |             |
| C                   | 4.40767900  | -1.72784600 | 2.18124100  |   |             |             |             |
| C                   | 5.72729900  | -1.80485200 | 2.62251400  |   |             |             |             |
| C                   | 6.74421900  | -2.17844400 | 1.73946200  |   |             |             |             |
| C                   | 6.42290800  | -2.47172200 | 0.41468600  |   |             |             |             |
| C                   | 5.09892400  | -2.38886600 | -0.02626000 |   |             |             |             |
| H                   | 3.63221200  | -1.43652600 | 2.88134200  |   |             |             |             |
| H                   | 5.96187900  | -1.57275200 | 3.65760200  |   |             |             |             |
| H                   | 7.77278200  | -2.24166700 | 2.08246900  |   |             |             |             |
| H                   | 7.20097400  | -2.76887000 | -0.28277300 |   |             |             |             |

|                    |             |             |             |   |             |             |             |
|--------------------|-------------|-------------|-------------|---|-------------|-------------|-------------|
| C                  | -3.28709700 | 0.28945300  | 0.97334000  | C | -6.68283000 | -1.45696700 | -1.12654800 |
| C                  | -4.66882000 | 0.12887900  | 1.17072900  | C | -6.17733900 | -1.54621700 | 0.17052000  |
| C                  | -2.55691800 | 1.06507500  | 1.88343700  | C | -4.80593500 | -1.69916500 | 0.38356900  |
| C                  | -3.19159800 | 1.69564500  | 2.95472000  | H | -3.76544400 | -1.76011700 | -2.84308400 |
| C                  | -4.56691400 | 1.54130200  | 3.13603800  | H | -6.18171700 | -1.47517100 | -3.22467500 |
| C                  | -5.30165800 | 0.75164700  | 2.24613800  | H | -7.74855100 | -1.33116000 | -1.29404500 |
| H                  | -2.56404000 | -0.03241300 | -2.78595200 | H | -6.84794500 | -1.48914400 | 1.02321500  |
| H                  | -2.54647400 | 2.42811800  | -0.97960600 | H | -4.43979100 | -1.74972400 | 1.40194900  |
| H                  | -2.84369400 | 2.51449700  | -2.70039300 | C | -2.41355800 | -1.92409500 | -0.46696100 |
| H                  | -0.61678200 | 3.11159800  | -2.47388300 | C | -1.57783100 | -0.81647100 | -1.17149600 |
| H                  | 2.24153100  | 0.32611900  | -2.59482600 | O | -1.84398500 | -0.37162200 | -2.27695800 |
| H                  | 4.46814700  | 0.94463800  | -3.44335200 | H | 0.63318700  | -1.85114700 | -1.78640000 |
| H                  | 5.49528700  | 3.11621300  | -2.78705900 | C | -1.91875000 | -3.28478600 | -1.06219000 |
| H                  | 4.24961700  | 4.66360200  | -1.29026600 | H | -2.18554600 | -3.33954200 | -2.12177400 |
| H                  | 2.01982200  | 4.04815900  | -0.44416700 | H | -2.49457800 | -4.06031300 | -0.54523200 |
| H                  | 1.04351600  | 1.85613200  | 1.94905000  | C | -1.97252300 | -1.87505900 | 1.00220900  |
| H                  | -1.18140500 | 4.26540700  | -0.84075800 | H | -2.35520000 | -2.75276800 | 1.54038300  |
| H                  | -1.67462300 | 5.87722500  | 0.93816100  | H | -2.37413900 | -0.98988400 | 1.49853100  |
| H                  | -0.82613400 | 5.50507800  | 3.24611300  | C | -0.41176500 | -3.58671700 | -0.88878500 |
| H                  | 0.55353400  | 3.49248700  | 3.74091800  | C | 0.48071500  | -2.94057400 | -1.94936400 |
| H                  | -3.25441800 | -2.46664000 | 1.48086600  | H | -0.29800700 | -4.66953100 | -1.01747000 |
| H                  | -4.10696600 | -4.76779500 | 1.25834100  | H | 1.48528200  | -3.37104500 | -1.92840200 |
| H                  | -4.55053100 | -5.72748400 | -0.99475100 | H | 0.06992800  | -3.02786000 | -2.95980000 |
| H                  | -4.13334300 | -4.34915900 | -3.02339500 | C | -0.45158500 | -1.87289900 | 1.02193000  |
| H                  | -3.26961000 | -2.05662000 | -2.81188500 | C | 0.08974900  | -3.21670300 | 0.51898400  |
| H                  | -5.24734500 | -0.48791100 | 0.49249300  | H | -0.05391100 | -1.65938400 | 2.01347200  |
| H                  | -1.48861700 | 1.17273600  | 1.75559000  | H | 1.18140300  | -3.24689800 | 0.54364400  |
| H                  | -2.60850400 | 2.30000800  | 3.64285600  | H | -0.25747300 | -3.97146800 | 1.24157500  |
| H                  | -5.06524200 | 2.02708300  | 3.96972200  | P | 2.50172500  | -0.17763700 | 0.46912300  |
| H                  | -6.37030600 | 0.62135600  | 2.38911600  | C | 2.77156700  | 0.63970800  | 2.11978600  |
| C                  | -0.44040400 | 1.26175100  | -3.52233300 | C | 1.87837300  | 1.88531100  | 2.26561000  |
| H                  | 0.55065800  | 1.53745200  | -3.88678300 | C | 0.35821300  | 1.66204200  | 2.45896200  |
| H                  | -0.44896800 | 0.18380700  | -3.34442900 | P | -0.55768400 | 1.34744000  | 0.86860200  |
| H                  | -1.16255500 | 1.47869900  | -4.31695800 | C | -2.34405700 | 1.58992700  | 1.24944300  |
| C                  | -4.47277300 | 0.65019900  | -2.07425400 | C | -2.80742300 | 1.96873400  | 2.51881600  |
| H                  | -4.89162500 | 1.29017700  | -1.29268000 | C | -4.16809200 | 2.19414500  | 2.73609700  |
| H                  | -4.70989600 | 1.10385500  | -3.04275900 | C | -5.08137200 | 2.05942500  | 1.69091400  |
| H                  | -4.97265100 | -0.31993400 | -2.02524700 | C | -4.62519800 | 1.71238500  | 0.41813200  |
| Rh                 | 0.08643000  | -0.53438700 | -0.02518100 | C | -3.26979300 | 1.48082500  | 0.19828100  |
|                    |             |             |             | C | -0.23226800 | 2.79404900  | -0.21207800 |
|                    |             |             |             | C | -0.46309800 | 2.64761100  | -1.58992300 |
| 10 <sub>LIRh</sub> |             |             |             | C | 0.19207100  | 4.03403400  | 0.28628800  |
| C                  | -3.90974300 | -1.77216400 | -0.69194500 | C | 0.41171300  | 5.10049400  | -0.58626300 |
| C                  | -4.43441300 | -1.70241500 | -1.99368900 | C | 0.19786400  | 4.94524100  | -1.95719800 |
| C                  | -5.80274200 | -1.53754300 | -2.20834800 |   |             |             |             |

|   |             |             |             |                     |             |             |             |
|---|-------------|-------------|-------------|---------------------|-------------|-------------|-------------|
| C | -0.24979100 | 3.72016700  | -2.45582300 | H                   | 4.88735800  | 0.11688700  | 2.29263000  |
| C | 3.39756700  | -1.77069000 | 0.56747500  | Rh                  | 0.18916700  | -0.42437000 | -0.30185900 |
| C | 3.90561500  | -2.34108900 | -0.61174100 |                     |             |             |             |
| C | 4.46751700  | -3.61729100 | -0.59563500 | TS9 <sub>LIRh</sub> |             |             |             |
| C | 4.52831400  | -4.34329500 | 0.59628500  | C                   | 4.02091400  | -1.87962000 | 0.53214400  |
| C | 4.02720900  | -3.78339600 | 1.77283700  | C                   | 4.75000300  | -1.45631300 | 1.65712200  |
| C | 3.46144400  | -2.50729100 | 1.76039000  | C                   | 6.12728400  | -1.24830800 | 1.58586600  |
| C | 3.43758100  | 0.79047800  | -0.76810700 | C                   | 6.81464700  | -1.46929800 | 0.39027400  |
| C | 4.83735700  | 0.90359500  | -0.78532700 | C                   | 6.10724600  | -1.90436400 | -0.73067800 |
| C | 2.68827800  | 1.44029000  | -1.75867400 | C                   | 4.72615300  | -2.10412500 | -0.65993200 |
| C | 3.31275700  | 2.22653000  | -2.72779500 | H                   | 4.23528800  | -1.27300500 | 2.59187900  |
| C | 4.70269800  | 2.35273500  | -2.72261300 | H                   | 6.66439600  | -0.91399200 | 2.46913200  |
| C | 5.46237200  | 1.68334000  | -1.75761900 | H                   | 7.88739600  | -1.30883000 | 0.33548200  |
| H | 2.44334900  | -0.11314500 | 2.84029900  | H                   | 6.62652500  | -2.08935600 | -1.66681500 |
| H | 2.06803400  | 2.56687800  | 1.43154200  | H                   | 4.20573000  | -2.43547700 | -1.55084500 |
| H | 2.21692700  | 2.41177000  | 3.16605000  | C                   | 2.51420200  | -2.04923200 | 0.61508700  |
| H | -0.04847200 | 2.61822800  | 2.80515500  | C                   | 1.78416800  | -0.71226100 | 0.97562800  |
| H | -2.12460600 | 2.10718900  | 3.34591800  | O                   | 2.24921800  | 0.08310200  | 1.77302500  |
| H | -4.50781600 | 2.48090900  | 3.72670400  | H                   | 0.27966100  | -1.55146900 | 3.31078100  |
| H | -6.13940700 | 2.23001200  | 1.86433700  | C                   | 2.11500700  | -3.03460300 | 1.75295300  |
| H | -5.32375800 | 1.60532700  | -0.40512500 | H                   | 2.55459400  | -2.70098500 | 2.69562800  |
| H | -2.94383600 | 1.21517600  | -0.79795800 | H                   | 2.57453100  | -3.99695100 | 1.50735400  |
| H | -0.80818700 | 1.69786100  | -1.98650400 | C                   | 1.86159800  | -2.55343800 | -0.67965000 |
| H | 0.34755100  | 4.18577700  | 1.34803100  | H                   | 2.19325600  | -3.57793900 | -0.89787500 |
| H | 0.74636800  | 6.05451800  | -0.19050900 | H                   | 2.13963900  | -1.93931100 | -1.54168800 |
| H | 0.37166300  | 5.77778300  | -2.63194500 | C                   | 0.58234600  | -3.21183300 | 1.93258600  |
| H | -0.42939500 | 3.59502500  | -3.51932000 | C                   | 0.06739800  | -2.62444000 | 3.25118700  |
| H | 3.86589300  | -1.78724200 | -1.54393600 | H                   | 0.37890700  | -4.29091500 | 1.96639500  |
| H | 4.85845300  | -4.04302300 | -1.51493400 | H                   | -1.01562400 | -2.76342700 | 3.34442600  |
| H | 4.96495600  | -5.33720000 | 0.60766700  | H                   | 0.54820800  | -3.11335000 | 4.10472700  |
| H | 4.07404100  | -4.33945700 | 2.70431200  | C                   | 0.36865800  | -2.51901100 | -0.52444400 |
| H | 3.06735400  | -2.09708700 | 2.68380600  | C                   | -0.22154000 | -2.73066800 | 0.73752900  |
| H | 5.43626500  | 0.37586000  | -0.05206900 | H                   | -0.23046400 | -2.65792300 | -1.42033000 |
| H | 1.60949000  | 1.32639100  | -1.76024400 | H                   | -0.77529900 | -1.02976500 | 1.45700600  |
| H | 2.71575600  | 2.73444600  | -3.47896300 | H                   | -1.27116200 | -3.00548800 | 0.76219800  |
| H | 5.19633400  | 2.96268600  | -3.47317900 | P                   | -2.37287200 | -0.37365400 | -0.61180600 |
| H | 6.54479800  | 1.76932200  | -1.76339600 | C                   | -2.56046300 | 0.43877000  | -2.28313400 |
| C | 0.07228700  | 0.61473400  | 3.54575000  | C                   | -1.96957600 | 1.86250000  | -2.28990400 |
| H | -0.99291900 | 0.44862100  | 3.70781200  | C                   | -0.43398500 | 2.01670300  | -2.35850900 |
| H | 0.51775300  | -0.35123000 | 3.31106800  | P                   | 0.44279900  | 1.66609800  | -0.75823400 |
| H | 0.50765600  | 0.95855300  | 4.48996200  | C                   | 2.18353500  | 2.11420400  | -1.10886500 |
| C | 4.23200300  | 0.98148400  | 2.42697800  | C                   | 3.11640800  | 1.11370200  | -1.40903000 |
| H | 4.59469600  | 1.79177700  | 1.78900700  | C                   | 4.43965100  | 1.44656700  | -1.69896500 |
| H | 4.31601400  | 1.31035200  | 3.46854100  | C                   | 4.83939300  | 2.78455900  | -1.69237100 |

|   |             |             |             |                    |             |             |             |
|---|-------------|-------------|-------------|--------------------|-------------|-------------|-------------|
| C | 3.91210700  | 3.78852200  | -1.40041100 | C                  | 0.19232600  | 1.16371400  | -3.47188200 |
| C | 2.58870200  | 3.45721000  | -1.10875300 | H                  | 1.23050000  | 1.45097000  | -3.65341700 |
| C | -0.09237000 | 2.93212400  | 0.45015200  | H                  | 0.17649500  | 0.09533100  | -3.23146300 |
| C | 0.29655800  | 2.74760700  | 1.78868600  | H                  | -0.36690600 | 1.30764600  | -4.40247600 |
| C | -0.87588800 | 4.04187400  | 0.10725000  | C                  | -4.00422600 | 0.47144900  | -2.79760000 |
| C | -1.28901000 | 4.93921200  | 1.09489400  | H                  | -4.61022900 | 1.17787100  | -2.22367600 |
| C | -0.91592500 | 4.74319400  | 2.42519700  | H                  | -4.00694100 | 0.80017400  | -3.84251700 |
| C | -0.11329700 | 3.65096600  | 2.76816300  | H                  | -4.48305400 | -0.50969900 | -2.75078100 |
| C | -3.13337500 | -2.02632600 | -0.81021200 | Rh                 | -0.07578600 | -0.55582900 | 0.19218500  |
| C | -3.79304600 | -2.63428400 | 0.27056800  |                    |             |             |             |
| C | -4.24738000 | -3.95005500 | 0.17334100  |                    |             |             |             |
| C | -4.04425800 | -4.67914800 | -1.00060700 | 11 <sub>LIRh</sub> |             |             |             |
| C | -3.38478300 | -4.08428300 | -2.07829400 | C                  | 3.94667900  | -1.94813700 | 0.72542200  |
| C | -2.92772900 | -2.76886800 | -1.98446800 | C                  | 4.83557700  | -1.29142400 | 1.59426200  |
| C | -3.49340100 | 0.52394800  | 0.52065400  | C                  | 6.20125400  | -1.23473000 | 1.32018300  |
| C | -4.89265300 | 0.48050500  | 0.39949100  | C                  | 6.71795900  | -1.83596700 | 0.17048500  |
| C | -2.92037300 | 1.29275300  | 1.54385200  | C                  | 5.85069800  | -2.49682300 | -0.69883800 |
| C | -3.72534100 | 2.02628100  | 2.41751900  | C                  | 4.48178700  | -2.54975100 | -0.42433300 |
| C | -5.11381300 | 1.98789600  | 2.28188300  | H                  | 4.45730300  | -0.80435400 | 2.48389300  |
| C | -5.69524500 | 1.20963100  | 1.27604200  | H                  | 6.86354500  | -0.71728000 | 2.00847800  |
| H | -1.96851100 | -0.19448400 | -2.95012100 | H                  | 7.78213000  | -1.79261400 | -0.04176800 |
| H | -2.38145700 | 2.42798400  | -1.44873700 | H                  | 6.23498700  | -2.97642000 | -1.59467400 |
| H | -2.35257000 | 2.35167900  | -3.19352000 | H                  | 3.83774900  | -3.07254500 | -1.12172900 |
| H | -0.22482300 | 3.06919100  | -2.58294600 | C                  | 2.45196300  | -1.93434800 | 0.99928100  |
| H | 2.81143400  | 0.07446500  | -1.41007300 | C                  | 1.88488900  | -0.47054200 | 0.85144800  |
| H | 5.15585800  | 0.65966200  | -1.91260900 | O                  | 2.49940500  | 0.46252800  | 1.33668800  |
| H | 5.87102500  | 3.04471900  | -1.90980500 | H                  | 0.60122500  | -0.06368300 | 3.22131200  |
| H | 4.21955000  | 4.83001000  | -1.39437000 | C                  | 2.11272300  | -2.35007600 | 2.45859200  |
| H | 1.87526400  | 4.24107300  | -0.87521500 | H                  | 2.69939900  | -1.75707600 | 3.16198100  |
| H | 0.91578500  | 1.89547100  | 2.05385700  | H                  | 2.42722300  | -3.39261400 | 2.57385400  |
| H | -1.16846200 | 4.22023300  | -0.92059600 | C                  | 1.64547600  | -2.84844500 | 0.06236700  |
| H | -1.90156200 | 5.79258700  | 0.81992100  | H                  | 1.97770400  | -3.89029800 | 0.16181400  |
| H | -1.24415900 | 5.43994300  | 3.19054300  | H                  | 1.80164600  | -2.57635900 | -0.98840700 |
| H | 0.18783100  | 3.49820600  | 3.80037400  | C                  | 0.60709800  | -2.21415000 | 2.81435100  |
| H | -3.95212400 | -2.08027000 | 1.18987000  | C                  | 0.28262100  | -0.99663300 | 3.69172400  |
| H | -4.75924600 | -4.40434200 | 1.01649900  | H                  | 0.33412100  | -3.09809800 | 3.40901700  |
| H | -4.39789900 | -5.70297600 | -1.07532300 | H                  | -0.79461700 | -0.93131600 | 3.88123300  |
| H | -3.22460300 | -4.64278800 | -2.99576700 | H                  | 0.79292700  | -1.08071300 | 4.65648800  |
| H | -2.41148400 | -2.32775100 | -2.83077400 | C                  | 0.17840200  | -2.73061700 | 0.37350300  |
| H | -5.35455000 | -0.13237500 | -0.36599000 | C                  | -0.27859000 | -2.32492800 | 1.59793000  |
| H | -1.84309600 | 1.31920800  | 1.65271900  | H                  | -0.53026000 | -3.08306600 | -0.37023600 |
| H | -3.26454500 | 2.62251100  | 3.19892700  | H                  | -0.35441200 | 0.24522000  | 1.31546700  |
| H | -5.74341500 | 2.55537000  | 2.96080600  | H                  | -1.34982200 | -2.31002700 | 1.78115200  |
| H | -6.77570800 | 1.16894800  | 1.17513800  | P                  | -2.33070100 | -0.49031500 | -0.66685800 |
|   |             |             |             | C                  | -2.74261200 | 0.41211100  | -2.24767300 |

|   |             |             |             |                      |             |             |             |
|---|-------------|-------------|-------------|----------------------|-------------|-------------|-------------|
| C | -2.18586300 | 1.84608800  | -2.21179500 | H                    | -2.76752800 | -4.62336400 | -3.36637100 |
| C | -0.65712000 | 2.01123900  | -2.36265300 | H                    | -2.28660900 | -2.23494700 | -3.03939500 |
| P | 0.31162500  | 1.68132600  | -0.80533500 | H                    | -5.23580600 | -0.89997000 | -0.09476500 |
| C | 2.02897600  | 2.06129000  | -1.31924900 | H                    | -1.99158500 | 1.46541700  | 1.46182200  |
| C | 2.86462600  | 1.02911900  | -1.76927300 | H                    | -3.52449900 | 2.51323900  | 3.07682300  |
| C | 4.15973300  | 1.30668600  | -2.20113000 | H                    | -5.92623200 | 1.84998700  | 3.12835700  |
| C | 4.63174200  | 2.62194900  | -2.18855100 | H                    | -6.76593400 | 0.13965000  | 1.53134500  |
| C | 3.80289200  | 3.65531700  | -1.74823800 | C                    | -0.08938000 | 1.17927500  | -3.52249000 |
| C | 2.50500500  | 3.37840700  | -1.31429100 | H                    | 0.93064200  | 1.48123700  | -3.76558800 |
| C | -0.13149400 | 3.00631000  | 0.37645900  | H                    | -0.07874100 | 0.10690300  | -3.29898700 |
| C | 0.32118100  | 2.88065000  | 1.70132000  | H                    | -0.70803600 | 1.32590900  | -4.41405600 |
| C | -0.90907100 | 4.11553300  | 0.01851100  | C                    | -4.23604300 | 0.41667800  | -2.58452200 |
| C | -1.25533200 | 5.06878300  | 0.97937100  | H                    | -4.80207800 | 1.02456600  | -1.87349000 |
| C | -0.82057500 | 4.92898600  | 2.29716700  | H                    | -4.38265200 | 0.84176400  | -3.58336600 |
| C | -0.02262800 | 3.83757500  | 2.65358000  | H                    | -4.65545200 | -0.59275400 | -2.58268600 |
| C | -2.89639800 | -2.20792300 | -0.95970100 | Rh                   | 0.02103900  | -0.43877500 | 0.03460400  |
| C | -3.38508900 | -2.99471300 | 0.09631800  |                      |             |             |             |
| C | -3.64875700 | -4.35160700 | -0.09340300 | TS10 <sub>LIRh</sub> |             |             |             |
| C | -3.42570800 | -4.94500800 | -1.33730500 | C                    | 4.04577800  | -2.04611300 | 0.70266500  |
| C | -2.93827400 | -4.17201800 | -2.39357700 | C                    | 4.89665300  | -1.35699800 | 1.58349800  |
| C | -2.67086700 | -2.81545800 | -2.20684700 | C                    | 6.28150800  | -1.48381300 | 1.49431800  |
| C | -3.49619200 | 0.20442700  | 0.56665000  | C                    | 6.85242300  | -2.30431600 | 0.51764800  |
| C | -4.85410400 | -0.15689200 | 0.59599200  | C                    | 6.02098600  | -2.99274400 | -0.36443600 |
| C | -3.03251500 | 1.17066300  | 1.47232500  | C                    | 4.63189500  | -2.86327700 | -0.27277200 |
| C | -3.90341400 | 1.76527100  | 2.38699600  | H                    | 4.47633700  | -0.70903200 | 2.34455700  |
| C | -5.24800900 | 1.39398100  | 2.41344300  | H                    | 6.91580700  | -0.93930300 | 2.18810500  |
| C | -5.72016200 | 0.43141100  | 1.51681600  | H                    | 7.93157700  | -2.40467900 | 0.44753300  |
| H | -2.21613100 | -0.14649400 | -3.02599700 | H                    | 6.44803900  | -3.63695100 | -1.12776000 |
| H | -2.54613600 | 2.35549000  | -1.31237500 | H                    | 4.01365400  | -3.41443900 | -0.97134600 |
| H | -2.63362400 | 2.38020100  | -3.05838600 | C                    | 2.53344600  | -1.89054200 | 0.82658100  |
| H | -0.46370300 | 3.06605500  | -2.58828900 | C                    | 2.11307200  | -0.43062500 | 0.51905900  |
| H | 2.51170300  | 0.00240900  | -1.76369200 | O                    | 2.90236200  | 0.48482200  | 0.42064800  |
| H | 4.80340300  | 0.49593300  | -2.52827200 | H                    | 0.32917400  | -0.16356700 | 3.20117500  |
| H | 5.64417200  | 2.83870000  | -2.51549300 | C                    | 2.08553300  | -2.20228000 | 2.29029600  |
| H | 4.16679100  | 4.67821700  | -1.73444100 | H                    | 2.54546700  | -1.47845100 | 2.96789400  |
| H | 1.87113300  | 4.18592600  | -0.96246800 | H                    | 2.51927200  | -3.17660900 | 2.53139700  |
| H | 0.95196100  | 2.04071900  | 1.97185800  | C                    | 1.74370400  | -2.79981600 | -0.12824900 |
| H | -1.25439400 | 4.25003500  | -0.99933800 | H                    | 1.98070400  | -3.85037800 | 0.08679300  |
| H | -1.86553600 | 5.91982200  | 0.69273700  | H                    | 2.02577800  | -2.61050900 | -1.16801000 |
| H | -1.09544600 | 5.66924100  | 3.04229800  | C                    | 0.55344500  | -2.23857200 | 2.54518500  |
| H | 0.33145300  | 3.73046800  | 3.67449000  | C                    | 0.09362600  | -1.17433800 | 3.55063500  |
| H | -3.56399900 | -2.54878200 | 1.06866300  | H                    | 0.32783300  | -3.21249500 | 3.00316500  |
| H | -4.02996400 | -4.94352100 | 0.73329500  | H                    | -0.98770700 | -1.23041500 | 3.71378500  |
| H | -3.63238300 | -6.00067600 | -1.48367300 | H                    | 0.59248800  | -1.32228200 | 4.51407600  |



|   |             |             |             |             |             |             |             |             |
|---|-------------|-------------|-------------|-------------|-------------|-------------|-------------|-------------|
| C | 0.27120900  | -2.56050500 | 0.04235600  | H           | -1.81168200 | 4.09984900  | -0.05654000 |             |
| C | -0.26509400 | -2.23417800 | 1.27483500  | H           | -2.07465200 | 5.42345600  | 1.99178300  |             |
| H | -0.37841600 | -2.89804500 | -0.75903500 | H           | -0.51329000 | 5.11231700  | 3.90154200  |             |
| H | 0.93689100  | 0.01816600  | 1.22824300  | H           | 1.34728300  | 3.46761600  | 3.71771900  |             |
| H | -1.33744000 | -2.30835300 | 1.42732100  | H           | -3.53668800 | -2.79658500 | 0.82803700  |             |
| P | -2.29934700 | -0.53207700 | -0.66869700 | H           | -3.99560700 | -5.13370700 | 0.19694500  |             |
| C | -2.94075900 | 0.54675200  | -2.04097100 | H           | -3.54476100 | -5.91834500 | -2.11951200 |             |
| C | -2.58210000 | 2.02041700  | -1.77589000 | H           | -2.62554000 | -4.33278900 | -3.80220000 |             |
| C | -1.12540500 | 2.43555800  | -2.05618600 | H           | -2.13976500 | -2.00211800 | -3.17566700 |             |
| P | 0.10478400  | 1.86550000  | -0.77019200 | H           | -5.15190100 | -0.93166600 | 0.17320700  |             |
| C | 1.68088100  | 2.36012300  | -1.55542400 | H           | -1.57758900 | 0.89246900  | 1.72990500  |             |
| C | 2.38144500  | 1.42585300  | -2.33160600 | H           | -2.84681400 | 1.70369800  | 3.69647100  |             |
| C | 3.53045200  | 1.80761100  | -3.02111100 | H           | -5.27339100 | 1.17907600  | 3.90984000  |             |
| C | 3.99321500  | 3.12424000  | -2.93466700 | H           | -6.40999900 | -0.14602100 | 2.14086900  |             |
| C | 3.29813600  | 4.05802000  | -2.16368400 | C           | -0.68129600 | 2.02100000  | -3.46736900 |             |
| C | 2.14130000  | 3.67982400  | -1.47834900 | H           | 0.20829300  | 2.56876300  | -3.78065500 |             |
| C | -0.09130500 | 2.99490300  | 0.66073700  | H           | -0.45911100 | 0.95198300  | -3.53932700 |             |
| C | 0.79859600  | 2.83593700  | 1.73884100  | H           | -1.48655400 | 2.24413700  | -4.17544100 |             |
| C | -1.11877300 | 3.94158600  | 0.76051500  | C           | -4.44534200 | 0.39266600  | -2.28733600 |             |
| C | -1.26929700 | 4.69799000  | 1.92629400  | H           | -5.02815200 | 0.82201600  | -1.46811200 |             |
| C | -0.39178700 | 4.52538800  | 2.99619100  | H           | -4.71225900 | 0.92792200  | -3.20477800 |             |
| C | 0.65061200  | 3.59845000  | 2.89498300  | H           | -4.73665000 | -0.65383600 | -2.40829600 |             |
| C | -2.81503400 | -2.22451100 | -1.12824600 | Rh          | -0.00086500 | -0.36250600 | 0.00730900  |             |
| C | -3.33197100 | -3.12436200 | -0.18472400 |             |             |             |             |             |
| C | -3.59280000 | -4.44871300 | -0.54306700 |             |             |             |             |             |
| C | -3.34027700 | -4.88852600 | -1.84290800 | $12_{LIRh}$ | C           | -4.51842600 | -1.55811500 | -0.69691600 |
| C | -2.82340000 | -3.99830600 | -2.78829800 | C           | -5.34195400 | -1.15495600 | -1.75957700 |             |
| C | -2.55602300 | -2.67680000 | -2.43406400 | C           | -6.72946700 | -1.25572500 | -1.67242300 |             |
| C | -3.27551500 | -0.05644200 | 0.80647900  | C           | -7.32750400 | -1.75668300 | -0.51433700 |             |
| C | -4.64307300 | -0.35170900 | 0.93429700  | C           | -6.52212300 | -2.14826100 | 0.55409800  |             |
| C | -2.63822500 | 0.68146800  | 1.81705200  | C           | -5.13157900 | -2.04674900 | 0.46442700  |             |
| C | -3.35452600 | 1.12951200  | 2.92729600  | H           | -4.90192600 | -0.75181600 | -2.66436100 |             |
| C | -4.71417000 | 0.83487500  | 3.04494300  | H           | -7.34307800 | -0.93995100 | -2.51111100 |             |
| C | -5.35415400 | 0.09054100  | 2.05015200  | H           | -8.40822400 | -1.83785100 | -0.44603000 |             |
| H | -2.40804200 | 0.19900900  | -2.93050800 | H           | -6.97149800 | -2.53605700 | 1.46366300  |             |
| H | -2.88274500 | 2.29198000  | -0.75911900 | H           | -4.53509400 | -2.35614500 | 1.31423100  |             |
| H | -3.20538900 | 2.62491800  | -2.44545400 | C           | -2.99780500 | -1.41772800 | -0.80958100 |             |
| H | -1.08218300 | 3.52929100  | -2.00624400 | C           | -2.63891900 | 0.06139300  | -0.79143500 |             |
| H | 2.02968700  | 0.40002200  | -2.38479100 | O           | -3.35352900 | 1.00018000  | -1.03680200 |             |
| H | 4.06937100  | 1.07778300  | -3.61817700 | H           | -0.71490600 | 0.23766700  | -2.68626200 |             |
| H | 4.89266800  | 3.41996300  | -3.46653700 | C           | -2.48791000 | -2.00245500 | -2.16827500 |             |
| H | 3.65320100  | 5.08207100  | -2.09565500 | H           | -3.00517500 | -1.52055500 | -2.99998900 |             |
| H | 1.60187600  | 4.41191600  | -0.88557600 | H           | -2.80241900 | -3.05094900 | -2.15799500 |             |
| H | 1.61387800  | 2.12365100  | 1.66464000  | C           | -2.24702200 | -2.16104100 | 0.32086500  |             |

|   |             |             |             |                     |             |             |             |
|---|-------------|-------------|-------------|---------------------|-------------|-------------|-------------|
| H | -2.67652900 | -3.16835400 | 0.38990500  | H                   | 1.78085400  | 3.32354100  | 2.21765100  |
| H | -2.43275400 | -1.68361100 | 1.28926000  | H                   | -1.73092900 | 0.39798900  | 2.22759300  |
| C | -0.96457300 | -1.93236800 | -2.40911900 | H                   | -3.91990200 | 1.04827000  | 3.20946600  |
| C | -0.51727200 | -0.70072900 | -3.21173700 | H                   | -4.64081400 | 3.42788000  | 3.15639600  |
| H | -0.72586100 | -2.79913500 | -3.04052400 | H                   | -3.16808700 | 5.14768200  | 2.13673300  |
| H | 0.55760200  | -0.74315600 | -3.41085300 | H                   | -0.99043200 | 4.49819500  | 1.15478200  |
| H | -1.04040900 | -0.66712300 | -4.17354200 | H                   | -1.16393900 | 2.41098100  | -1.44235100 |
| C | -0.75942000 | -2.31410900 | 0.10527700  | H                   | 2.54477300  | 3.85699000  | 0.22270000  |
| C | -0.16842700 | -2.15460800 | -1.13667100 | H                   | 2.92310200  | 5.19971600  | -1.79883500 |
| H | -0.22736900 | -2.84122900 | 0.89163900  | H                   | 1.28308100  | 5.15178400  | -3.66570300 |
| H | -1.54636700 | 0.30529700  | -0.58485000 | H                   | -0.77445400 | 3.76377700  | -3.46655500 |
| H | 0.83651800  | -2.53179200 | -1.28904300 | H                   | 3.18882700  | -3.12308000 | -1.08236500 |
| P | 2.25887800  | -0.77917700 | 0.53319100  | H                   | 3.34178000  | -5.52701900 | -0.56297800 |
| C | 3.10867600  | 0.06654400  | 1.96646600  | H                   | 2.75518200  | -6.35869800 | 1.70605700  |
| C | 3.01402800  | 1.60057100  | 1.87152000  | H                   | 2.00043600  | -4.75404700 | 3.45116400  |
| C | 1.65143400  | 2.23556900  | 2.21538200  | H                   | 1.81804100  | -2.35388800 | 2.93319400  |
| P | 0.37865300  | 1.86435400  | 0.91992900  | H                   | 5.01921200  | -1.55177300 | -0.38073700 |
| C | -1.21755600 | 2.40373000  | 1.63205400  | H                   | 1.73007100  | 0.83959200  | -1.78411600 |
| C | -2.05034800 | 1.43688500  | 2.21644600  | H                   | 3.07401400  | 1.54123800  | -3.74295000 |
| C | -3.27738800 | 1.80394200  | 2.76745300  | H                   | 5.39424700  | 0.68064400  | -4.02728200 |
| C | -3.68182900 | 3.14072800  | 2.73593100  | H                   | 6.35068900  | -0.87118700 | -2.33794900 |
| C | -2.85441000 | 4.10846000  | 2.16056400  | C                   | 1.14022500  | 1.81126800  | 3.59907800  |
| C | -1.62527500 | 3.74416500  | 1.60927500  | H                   | 0.32332400  | 2.45519700  | 3.93084500  |
| C | 0.67419600  | 3.01456100  | -0.47080500 | H                   | 0.77452700  | 0.77940300  | 3.60625600  |
| C | -0.25993500 | 3.00621500  | -1.52292500 | H                   | 1.95366600  | 1.88627000  | 4.32854000  |
| C | 1.81583100  | 3.81836900  | -0.57760400 | C                   | 4.57234500  | -0.35976500 | 2.13675200  |
| C | 2.03209500  | 4.58343400  | -1.72684600 | H                   | 5.20391400  | 0.06354900  | 1.35150400  |
| C | 1.11012100  | 4.55880900  | -2.77286000 | H                   | 4.94070400  | 0.01347200  | 3.09824500  |
| C | -0.04366900 | 3.77580800  | -2.66342400 | H                   | 4.69072300  | -1.44597600 | 2.12953500  |
| C | 2.51105000  | -2.55903800 | 0.89087700  | Rh                  | 0.11798800  | -0.29214300 | 0.15216200  |
| C | 2.92717200  | -3.47084000 | -0.08944800 |                     |             |             |             |
| C | 3.01409500  | -4.83321500 | 0.20521000  | cat <sub>L2Rh</sub> |             |             |             |
| C | 2.68499300  | -5.29952600 | 1.47818300  | C                   | -0.24365800 | 1.54747800  | 0.91202200  |
| C | 2.26135600  | -4.39827900 | 2.45901200  | C                   | -1.15398500 | 0.52785500  | 1.24793000  |
| C | 2.16763800  | -3.03888800 | 2.16684300  | C                   | -1.62760900 | 0.39759000  | 2.56110700  |
| C | 3.28280100  | -0.38357900 | -0.93496200 | C                   | -1.18657900 | 1.27989400  | 3.54271000  |
| C | 4.59073400  | -0.86885200 | -1.10430400 | C                   | 0.26470000  | 1.73733500  | -0.48073200 |
| C | 2.74583700  | 0.48013400  | -1.90215300 | C                   | 1.12675700  | 0.82208200  | -1.11156400 |
| C | 3.50329100  | 0.86679400  | -3.00836800 | C                   | 1.51416800  | 1.01286600  | -2.44683500 |
| C | 4.80358500  | 0.38438100  | -3.16560400 | C                   | 1.06209800  | 2.12717400  | -3.14525900 |
| C | 5.34259100  | -0.48699500 | -2.21538100 | H                   | -2.32980400 | -0.38802600 | 2.81309600  |
| H | 2.55113800  | -0.27550400 | 2.84315500  | H                   | -1.55325200 | 1.18364700  | 4.56024800  |
| H | 3.35496500  | 1.92116200  | 0.88149000  | H                   | 2.15949500  | 0.29383300  | -2.93644200 |
| H | 3.73686900  | 2.01039900  | 2.58694400  | H                   | 1.36463300  | 2.27794800  | -4.17714000 |

|   |             |             |             |            |             |             |             |
|---|-------------|-------------|-------------|------------|-------------|-------------|-------------|
| C | -0.27114400 | 2.28673400  | 3.23874800  | C          | -5.02919700 | -3.31196000 | 1.70801300  |
| C | 0.19927100  | 2.42178600  | 1.92811900  | H          | -3.45545900 | -4.44522200 | 2.65604400  |
| C | -0.18665000 | 2.85867400  | -1.21331300 | H          | -6.36885800 | -2.00112200 | 0.64239800  |
| C | 0.21475900  | 3.05360100  | -2.53851600 | H          | -5.82666100 | -3.93061500 | 2.10828900  |
| C | 2.14783300  | -0.25939400 | 1.38696700  | P          | 1.53982900  | -0.75176500 | -0.27298000 |
| C | 3.02540400  | 0.82267000  | 1.54566800  | P          | -1.56127500 | -0.75450900 | 0.00467700  |
| C | 1.75089100  | -0.99899400 | 2.50793800  | Rh         | -0.02659500 | -2.26445100 | -0.36300300 |
| C | 3.49820900  | 1.15716300  | 2.81313800  | H          | -0.13733700 | 3.90928700  | -3.10001800 |
| H | 3.31601600  | 1.42148300  | 0.68995100  | H          | 0.07099100  | 2.95466800  | 4.01882800  |
| C | 2.21998900  | -0.65701000 | 3.77680900  | O          | -1.04262100 | 3.68051100  | -0.55786600 |
| H | 1.05983900  | -1.82728500 | 2.37615000  | O          | 1.11113200  | 3.34862300  | 1.54492200  |
| C | 3.09421800  | 0.42080500  | 3.93044000  | C          | -1.56030900 | 4.81317500  | -1.25192200 |
| H | 4.17476100  | 1.99828600  | 2.92970500  | H          | -2.11891200 | 4.51360500  | -2.14517900 |
| H | 1.89897100  | -1.22718500 | 4.64347900  | H          | -2.23538400 | 5.30615000  | -0.55105500 |
| H | 3.45795800  | 0.68917400  | 4.91778200  | H          | -0.76022100 | 5.50669700  | -1.53498500 |
| C | 3.03603800  | -1.40948900 | -1.10781800 | C          | 1.62665500  | 4.24039100  | 2.53033900  |
| C | 3.05328100  | -2.77497800 | -1.43144400 | H          | 2.12228100  | 3.69618400  | 3.34125500  |
| C | 4.16386700  | -0.62364500 | -1.38955100 | H          | 2.35742100  | 4.86351800  | 2.01279000  |
| C | 4.17777100  | -3.34681700 | -2.02958800 | H          | 0.83566700  | 4.87616800  | 2.94461900  |
| H | 2.18958700  | -3.40180700 | -1.21677400 |            |             |             |             |
| C | 5.28297500  | -1.19550100 | -1.99276800 | $3L_{2Rh}$ |             |             |             |
| H | 4.16479100  | 0.43437400  | -1.15134700 | C          | -2.71430100 | -0.79951700 | 0.63168000  |
| C | 5.29233500  | -2.55605900 | -2.31279600 | C          | -1.65622200 | -1.46562300 | 1.27882400  |
| H | 4.18081000  | -4.40457000 | -2.27446800 | C          | -1.81101600 | -1.92303100 | 2.59415100  |
| H | 6.14853400  | -0.57850000 | -2.21425200 | C          | -3.00994700 | -1.70591900 | 3.26713600  |
| H | 6.16635200  | -2.99751100 | -2.78189000 | C          | -2.65355800 | -0.41311100 | -0.81169300 |
| C | -2.22061200 | 0.18283300  | -1.41788000 | C          | -1.93660400 | 0.68899700  | -1.31505000 |
| C | -1.88854100 | -0.21926300 | -2.71748700 | C          | -1.82481800 | 0.89346200  | -2.70563400 |
| C | -3.06191400 | 1.28854400  | -1.22304400 | C          | -2.47745900 | 0.03834800  | -3.58608400 |
| C | -2.38988800 | 0.48082600  | -3.81525000 | H          | -1.00008500 | -2.43929700 | 3.09187700  |
| H | -1.22148000 | -1.06617800 | -2.85500200 | H          | -3.12986200 | -2.06539800 | 4.28473100  |
| C | -3.56991600 | 1.97823300  | -2.32268600 | H          | -1.23091300 | 1.71339900  | -3.09105600 |
| H | -3.30237000 | 1.61852500  | -0.21807300 | H          | -2.39587600 | 0.20000400  | -4.65646400 |
| C | -3.23088300 | 1.57830900  | -3.61842400 | C          | -4.05645200 | -1.01621900 | 2.65817100  |
| H | -2.11887000 | 0.17518500  | -4.82131100 | C          | -3.90829800 | -0.56314400 | 1.34305800  |
| H | -4.22213200 | 2.83218800  | -2.16818900 | C          | -3.32529100 | -1.25513100 | -1.73068300 |
| H | -3.61932100 | 2.12418300  | -4.47297200 | C          | -3.23693000 | -1.02905000 | -3.10815600 |
| C | -2.97742600 | -1.70783800 | 0.67270200  | C          | -1.65440500 | 1.89288200  | 1.39509400  |
| C | -2.67604600 | -2.80702000 | 1.49797600  | C          | -2.86785200 | 2.59968500  | 1.43393000  |
| C | -4.31567900 | -1.42744300 | 0.36304500  | C          | -1.08092000 | 1.42341900  | 2.58011500  |
| C | -3.69801300 | -3.60246900 | 2.01577900  | C          | -3.50559400 | 2.81637400  | 2.65229800  |
| H | -1.63630800 | -3.02242700 | 1.73549400  | H          | -3.31515900 | 2.97269800  | 0.51933400  |
| C | -5.33437200 | -2.22679600 | 0.88289600  | C          | -1.72226400 | 1.65081900  | 3.79824700  |
| H | -4.56413500 | -0.59137100 | -0.28061600 | H          | -0.14021600 | 0.89344900  | 2.54803200  |

|    |             |             |             |                     |             |             |             |
|----|-------------|-------------|-------------|---------------------|-------------|-------------|-------------|
| C  | -2.93348100 | 2.34260000  | 3.83673800  | C                   | -4.70747800 | -3.17861100 | -2.05115300 |
| H  | -4.44556500 | 3.35882400  | 2.67772100  | H                   | -4.01944600 | -3.67422100 | -2.74334500 |
| H  | -1.27537200 | 1.28034500  | 4.71573700  | H                   | -5.16607100 | -3.92433100 | -1.40064800 |
| H  | -3.43099500 | 2.51541800  | 4.78632800  | H                   | -5.48882400 | -2.65780300 | -2.61605400 |
| C  | -0.84614800 | 3.41496800  | -0.82476400 | C                   | -6.06798200 | 0.45614700  | 1.35405600  |
| C  | 0.13407600  | 4.26137700  | -0.28244000 | H                   | -5.87341200 | 1.05135200  | 2.25273500  |
| C  | -1.81186300 | 3.94307900  | -1.69122300 | H                   | -6.65978800 | 1.04346800  | 0.65066700  |
| C  | 0.16401500  | 5.61097000  | -0.62572700 | H                   | -6.62139800 | -0.44991100 | 1.62640200  |
| H  | 0.86688400  | 3.86632700  | 0.41370000  | C                   | 4.17985100  | 0.28321500  | -0.47776200 |
| C  | -1.77522400 | 5.29665200  | -2.03386900 | C                   | 5.21738600  | 0.33858900  | -1.41848600 |
| H  | -2.59503200 | 3.31177700  | -2.09366700 | C                   | 5.82237200  | -0.82946100 | -1.88087400 |
| C  | -0.78681200 | 6.12979200  | -1.50919000 | C                   | 5.40487300  | -2.07827100 | -1.40936300 |
| H  | 0.92796300  | 6.25659600  | -0.20351900 | C                   | 4.39833200  | -2.14370300 | -0.44681600 |
| H  | -2.52570300 | 5.69740500  | -2.70843900 | C                   | 3.80291900  | -0.96865200 | 0.02275600  |
| H  | -0.76124600 | 7.18090800  | -1.77960000 | H                   | 5.54795500  | 1.29749200  | -1.80402400 |
| C  | -0.37769200 | -2.72715500 | -0.97111700 | H                   | 6.62072900  | -0.76546300 | -2.61464300 |
| C  | 0.20810300  | -2.44696100 | -2.21400700 | H                   | 5.87331000  | -2.98609500 | -1.77739300 |
| C  | -1.23196900 | -3.83138600 | -0.84196800 | H                   | 4.07721600  | -3.10009700 | -0.04570300 |
| C  | -0.05361100 | -3.26124400 | -3.31662000 | H                   | 3.05071300  | -1.04214300 | 0.79692200  |
| H  | 0.85787000  | -1.58178500 | -2.32079900 | C                   | 3.50237600  | 1.56793700  | -0.00138400 |
| C  | -1.48381400 | -4.64988900 | -1.94220200 | C                   | 2.15399600  | 1.23201700  | 0.70708500  |
| H  | -1.70346800 | -4.04227400 | 0.11212600  | O                   | 1.94580100  | 1.46652000  | 1.87523300  |
| C  | -0.89936500 | -4.36391100 | -3.17987300 | H                   | 2.65201800  | -0.18254400 | -2.58433100 |
| H  | 0.39649800  | -3.03207200 | -4.27778800 | C                   | 3.02843300  | 2.43900800  | -1.19137700 |
| H  | -2.14336200 | -5.50578100 | -1.83704700 | H                   | 3.86902500  | 2.65336600  | -1.86294100 |
| H  | -1.10695200 | -4.99817400 | -4.03636000 | H                   | 2.69868300  | 3.40035500  | -0.78680200 |
| C  | 1.04147700  | -2.52277300 | 1.57587900  | C                   | 4.45597600  | 2.36773200  | 0.92832700  |
| C  | 1.56071400  | -1.83456300 | 2.68711100  | H                   | 3.90752200  | 3.24518300  | 1.29121200  |
| C  | 1.43257000  | -3.84809600 | 1.34604800  | H                   | 5.28214400  | 2.72883100  | 0.30572000  |
| C  | 2.44293700  | -2.46928700 | 3.55873200  | C                   | 1.86709000  | 1.76416900  | -1.92278800 |
| H  | 1.29052300  | -0.79817600 | 2.85904800  | C                   | 2.26764300  | 0.75804300  | -3.00094200 |
| C  | 2.32549400  | -4.47682900 | 2.21780500  | H                   | 1.19004300  | 2.51361800  | -2.33832900 |
| H  | 1.04722700  | -4.39086400 | 0.49027500  | H                   | 1.42074200  | 0.51615200  | -3.65183600 |
| C  | 2.83055900  | -3.79165200 | 3.32337800  | H                   | 3.07518000  | 1.15300300  | -3.63470900 |
| H  | 2.83674600  | -1.92789600 | 4.41354900  | C                   | 5.00338100  | 1.58576600  | 2.08756400  |
| H  | 2.62398200  | -5.50378300 | 2.02976600  | C                   | 6.27405400  | 1.19447900  | 2.19692200  |
| H  | 3.52601900  | -4.28246100 | 3.99730000  | H                   | 4.29011500  | 1.32384800  | 2.86621600  |
| P  | -0.84975500 | 1.68602100  | -0.23291800 | H                   | 6.62394600  | 0.62324200  | 3.05286300  |
| P  | -0.03454900 | -1.59691500 | 0.42386600  | H                   | 7.01193400  | 1.43466000  | 1.43387600  |
| Rh | 0.93878800  | 0.42991900  | -0.60965300 |                     |             |             |             |
| H  | -3.73834500 | -1.68685500 | -3.80629000 | TS4 <sub>L2Rh</sub> |             |             |             |
| H  | -4.97328600 | -0.83644300 | 3.20463300  | C                   | -2.73751200 | -0.85144100 | 0.63275900  |
| O  | -4.01591900 | -2.28284600 | -1.18226900 | C                   | -1.60586600 | -1.35360300 | 1.30044900  |
| O  | -4.85650800 | 0.13822200  | 0.67178800  | C                   | -1.68434800 | -1.71225900 | 2.65330900  |

|   |             |             |             |    |             |             |             |
|---|-------------|-------------|-------------|----|-------------|-------------|-------------|
| C | -2.88279300 | -1.54976800 | 3.34187900  | H  | -1.97337500 | -5.43231700 | -1.75034800 |
| C | -2.71131400 | -0.53661300 | -0.82460300 | H  | -1.01389200 | -4.91198700 | -3.98271300 |
| C | -1.96534700 | 0.52352700  | -1.36410800 | C  | 1.10918400  | -2.31256200 | 1.58572100  |
| C | -1.84017000 | 0.65911200  | -2.75945500 | C  | 1.68482400  | -1.57781800 | 2.63688900  |
| C | -2.51647000 | -0.21171900 | -3.60492200 | C  | 1.41686700  | -3.67117300 | 1.44447200  |
| H | -0.82069100 | -2.11048900 | 3.16891600  | C  | 2.54631300  | -2.19904800 | 3.53788300  |
| H | -2.94421500 | -1.83011800 | 4.38897100  | H  | 1.46349300  | -0.52017100 | 2.74076900  |
| H | -1.20907900 | 1.42985200  | -3.18339600 | C  | 2.29152500  | -4.28590800 | 2.34332000  |
| H | -2.42614400 | -0.09644300 | -4.68071100 | H  | 0.98496800  | -4.24901000 | 0.63563400  |
| C | -4.00294800 | -1.01245300 | 2.71147400  | C  | 2.85509800  | -3.55434600 | 3.38903800  |
| C | -3.93062300 | -0.66239000 | 1.35895200  | H  | 2.98344200  | -1.62417300 | 4.34819500  |
| C | -3.38705700 | -1.41527800 | -1.70554700 | H  | 2.53070600  | -5.33803200 | 2.22258600  |
| C | -3.30220000 | -1.24268700 | -3.08928600 | H  | 3.53535700  | -4.03577600 | 4.08482400  |
| C | -1.74528600 | 1.85978300  | 1.30082700  | P  | -0.89030900 | 1.54809500  | -0.29010200 |
| C | -3.01227400 | 2.46330800  | 1.29374200  | P  | 0.00660400  | -1.42805100 | 0.42153000  |
| C | -1.09582500 | 1.61557400  | 2.51391700  | Rh | 1.06946100  | 0.45699100  | -0.29820400 |
| C | -3.63005900 | 2.79411400  | 2.49673800  | H  | -3.81525400 | -1.91704400 | -3.76263300 |
| H | -3.51331900 | 2.66978100  | 0.35392100  | H  | -4.91813500 | -0.86794300 | 3.27122000  |
| C | -1.71785200 | 1.95256900  | 3.71765800  | O  | -4.06749900 | -2.42606100 | -1.11303100 |
| H | -0.11076300 | 1.16213300  | 2.50874500  | O  | -4.95027500 | -0.09908300 | 0.66602800  |
| C | -2.98447700 | 2.53761700  | 3.71083500  | C  | -4.75694100 | -3.35676800 | -1.94513800 |
| H | -4.61254000 | 3.25619800  | 2.48805400  | H  | -4.06882000 | -3.87039400 | -2.62434500 |
| H | -1.21192000 | 1.75492900  | 4.65793200  | H  | -5.20656700 | -4.08301800 | -1.26688000 |
| H | -3.46771100 | 2.79840400  | 4.64760800  | H  | -5.54539400 | -2.86273800 | -2.52431000 |
| C | -0.92328800 | 3.26965000  | -0.93692600 | C  | -6.16408200 | 0.18297000  | 1.35973400  |
| C | -0.12492900 | 4.20148900  | -0.24924900 | H  | -5.99323200 | 0.87157000  | 2.19435300  |
| C | -1.79423900 | 3.72221100  | -1.93699400 | H  | -6.82074100 | 0.65576900  | 0.62820500  |
| C | -0.16862900 | 5.55217700  | -0.58879600 | H  | -6.63496000 | -0.73458700 | 1.73044300  |
| H | 0.52781300  | 3.86676600  | 0.55101500  | C  | 4.27128800  | 0.17845700  | -0.70541700 |
| C | -1.83198800 | 5.07769200  | -2.27286900 | C  | 5.30063200  | -0.05234200 | -1.62567600 |
| H | -2.46255600 | 3.03707200  | -2.44187000 | C  | 5.41575300  | -1.29012400 | -2.25961600 |
| C | -1.01589500 | 5.99313700  | -1.60868400 | C  | 4.50507700  | -2.31799000 | -1.98946300 |
| H | 0.45704200  | 6.25963500  | -0.05291500 | C  | 3.48814700  | -2.10675200 | -1.06056500 |
| H | -2.51194000 | 5.41511400  | -3.04926600 | C  | 3.38728700  | -0.86621200 | -0.42209900 |
| H | -1.04982100 | 7.04579800  | -1.87255100 | H  | 6.00945700  | 0.73743400  | -1.85489500 |
| C | -0.31748600 | -2.56203300 | -0.97414800 | H  | 6.21801200  | -1.45309700 | -2.97323700 |
| C | 0.22228600  | -2.27044100 | -2.23384300 | H  | 4.59687100  | -3.27564800 | -2.49214700 |
| C | -1.11670300 | -3.70259300 | -0.80444200 | H  | 2.78433300  | -2.89499300 | -0.82077400 |
| C | -0.02847200 | -3.11537600 | -3.31481800 | H  | 2.68866500  | -0.74247900 | 0.41518300  |
| H | 0.81687600  | -1.36985300 | -2.35648600 | C  | 4.10616800  | 1.51708700  | -0.02170500 |
| C | -1.35649300 | -4.54939000 | -1.88550200 | C  | 2.63417900  | 1.91614400  | 0.25647700  |
| H | -1.55953900 | -3.91842700 | 0.16191600  | O  | 2.25794000  | 2.50216200  | 1.27418000  |
| C | -0.81555200 | -4.25569700 | -3.14070600 | H  | 2.56788000  | 0.89890700  | -2.71372600 |
| H | 0.38195700  | -2.87823400 | -4.29163800 | C  | 4.01906600  | 2.66686100  | -1.07877300 |

|            |             |             |             |    |             |             |             |
|------------|-------------|-------------|-------------|----|-------------|-------------|-------------|
| H          | 4.58322400  | 2.49764300  | -1.99741300 | C  | -1.21454600 | 3.29100500  | -0.52767800 |
| H          | 4.29242300  | 3.62227300  | -0.62622400 | C  | -0.41282000 | 4.24274000  | 0.12069600  |
| C          | 5.07306600  | 1.69731300  | 1.15776400  | C  | -2.22089400 | 3.72670200  | -1.40566600 |
| H          | 4.93337600  | 2.70960600  | 1.55415600  | C  | -0.59449800 | 5.60332000  | -0.12946900 |
| H          | 6.09989800  | 1.61820700  | 0.78382100  | H  | 0.35624800  | 3.91675100  | 0.81012500  |
| C          | 2.47589800  | 2.55207100  | -1.25610400 | C  | -2.39464400 | 5.08821600  | -1.65350400 |
| C          | 2.09004400  | 1.87125900  | -2.57807600 | H  | -2.87603800 | 3.01402600  | -1.89109900 |
| H          | 1.93510600  | 3.48953600  | -1.16313400 | C  | -1.57983500 | 6.02932300  | -1.02149900 |
| H          | 1.00966900  | 1.75759400  | -2.69529700 | H  | 0.03711800  | 6.32891500  | 0.37438900  |
| H          | 2.43889700  | 2.52312500  | -3.38890700 | H  | -3.17342600 | 5.41112800  | -2.33764700 |
| C          | 4.83314600  | 0.68377100  | 2.24229500  | H  | -1.71810200 | 7.08834600  | -1.21739200 |
| C          | 5.66277900  | -0.31648600 | 2.54155400  | C  | 0.31142200  | -2.19240600 | -1.14738500 |
| H          | 3.89315900  | 0.78440000  | 2.78258300  | C  | 0.99993000  | -1.51713600 | -2.16233800 |
| H          | 5.43276200  | -1.03527600 | 3.32302300  | C  | -0.24698200 | -3.45485600 | -1.39712100 |
| H          | 6.60468100  | -0.45064700 | 2.01315500  | C  | 1.13634600  | -2.10205900 | -3.42027700 |
|            |             |             |             | H  | 1.41579700  | -0.53774000 | -1.95763400 |
|            |             |             |             | C  | -0.09638400 | -4.04089100 | -2.65308700 |
| $4_{L2Rh}$ |             |             |             | H  | -0.81030400 | -3.96472000 | -0.62302100 |
| C          | -2.62925800 | -1.25488800 | 0.23387600  | C  | 0.59155600  | -3.36443500 | -3.66496300 |
| C          | -1.57102800 | -1.74752600 | 1.01472700  | H  | 1.66656100  | -1.57245100 | -4.20569500 |
| C          | -1.81988200 | -2.35731300 | 2.25150600  | H  | -0.52373600 | -5.02019800 | -2.84486900 |
| C          | -3.12886800 | -2.46585300 | 2.71241400  | H  | 0.69881500  | -3.82067500 | -4.64450300 |
| C          | -2.40616200 | -0.69437000 | -1.13157400 | C  | 1.18514100  | -2.31090900 | 1.67805700  |
| C          | -1.78944000 | 0.54372800  | -1.38682700 | C  | 1.60120400  | -1.60589600 | 2.82107600  |
| C          | -1.56563000 | 0.95363500  | -2.71267900 | C  | 1.58585700  | -3.64137500 | 1.50361300  |
| C          | -1.95947000 | 0.14688200  | -3.77276400 | C  | 2.41112600  | -2.22346600 | 3.77383500  |
| H          | -1.00123900 | -2.73886700 | 2.84874200  | H  | 1.28948500  | -0.57075100 | 2.96144100  |
| H          | -3.32734300 | -2.94471500 | 3.66649400  | C  | 2.39604000  | -4.25573900 | 2.45967400  |
| H          | -1.09616500 | 1.90449600  | -2.92030300 | H  | 1.27775600  | -4.19329800 | 0.62272500  |
| H          | -1.78522200 | 0.47516900  | -4.79276200 | C  | 2.81151100  | -3.54938400 | 3.59088700  |
| C          | -4.19203800 | -1.95335500 | 1.97094000  | H  | 2.72924300  | -1.67122400 | 4.65264800  |
| C          | -3.94408700 | -1.34620000 | 0.73467000  | H  | 2.70623700  | -5.28640900 | 2.31771400  |
| C          | -2.78940200 | -1.50420700 | -2.22796600 | H  | 3.44613800  | -4.03098600 | 4.32839900  |
| C          | -2.56874400 | -1.08478300 | -3.54186500 | P  | -1.06954600 | 1.53374200  | -0.01775600 |
| C          | -2.27461100 | 1.48832100  | 1.36742300  | P  | 0.14521700  | -1.40032100 | 0.48167500  |
| C          | -3.59406500 | 1.92372200  | 1.18104200  | Rh | 0.88311600  | 0.77189200  | 0.72878900  |
| C          | -1.85114000 | 1.07436000  | 2.63627400  | H  | -2.85557100 | -1.71043200 | -4.37722100 |
| C          | -4.48250600 | 1.92532800  | 2.25445300  | H  | -5.20125800 | -2.02914000 | 2.35514400  |
| H          | -3.93049200 | 2.25199300  | 0.20378200  | O  | -3.33985900 | -2.70024500 | -1.90512400 |
| C          | -2.74310100 | 1.07721400  | 3.70855100  | O  | -4.90577800 | -0.79438500 | -0.04488300 |
| H          | -0.82710200 | 0.73133900  | 2.76462100  | C  | -3.70937200 | -3.58190200 | -2.96324600 |
| C          | -4.05993700 | 1.50031700  | 3.51754200  | H  | -2.84304300 | -3.85323400 | -3.57572100 |
| H          | -5.50478600 | 2.25913700  | 2.10560300  | H  | -4.10523900 | -4.47538500 | -2.47882300 |
| H          | -2.41215800 | 0.74322900  | 4.68726700  | H  | -4.48490800 | -3.13889000 | -3.59844500 |
| H          | -4.75596300 | 1.50058800  | 4.35096700  |    |             |             |             |

|                     |             |             |             |   |             |             |             |
|---------------------|-------------|-------------|-------------|---|-------------|-------------|-------------|
| C                   | -6.24798400 | -0.79399800 | 0.43744500  | H | 7.35868700  | -1.53293300 | -1.18229800 |
| H                   | -6.32641300 | -0.26462200 | 1.39317200  | H | 7.86254800  | -1.62271200 | 1.25514000  |
| H                   | -6.83407300 | -0.26884800 | -0.31785900 | H | 6.33449800  | -0.49577300 | 2.86390700  |
| H                   | -6.63213700 | -1.81419000 | 0.55006400  | H | 4.32530100  | 0.68438500  | 2.05112000  |
| C                   | 4.18148000  | 0.38030600  | -0.78760700 | C | 3.47658100  | 1.00028400  | -0.56366100 |
| C                   | 4.94165100  | 0.17488400  | -1.94592800 | C | 2.22308300  | 0.88352000  | 0.32669700  |
| C                   | 5.18051400  | -1.11363000 | -2.42987100 | O | 2.14405800  | 1.12185600  | 1.50730700  |
| C                   | 4.67349700  | -2.22507500 | -1.75569000 | H | 1.76720800  | -1.19745900 | -3.80877100 |
| C                   | 3.92758200  | -2.03655000 | -0.59172500 | C | 2.90808900  | 0.38883200  | -1.86074800 |
| C                   | 3.68626700  | -0.74847300 | -0.11630700 | H | 3.20176500  | 0.81822000  | -2.81733100 |
| H                   | 5.36239900  | 1.01927300  | -2.48006600 | H | 1.62837200  | 1.31854700  | -1.94928500 |
| H                   | 5.76890900  | -1.24478800 | -3.33343100 | C | 3.85012000  | 2.49879600  | -0.79908200 |
| H                   | 4.85751300  | -3.22694200 | -2.13185500 | H | 3.03651800  | 2.96038000  | -1.36899200 |
| H                   | 3.52674600  | -2.88762600 | -0.05354700 | H | 4.73717300  | 2.49333100  | -1.44122600 |
| H                   | 3.11976900  | -0.62093500 | 0.79984200  | C | 2.50947000  | -0.97158400 | -1.78183600 |
| C                   | 3.94111700  | 1.75924700  | -0.20382100 | C | 2.27434800  | -1.77864300 | -3.03188000 |
| C                   | 2.44685000  | 2.16448300  | -0.00720700 | H | 2.87217200  | -1.53513600 | -0.92802000 |
| O                   | 1.95526400  | 2.49876500  | 1.13494900  | H | 3.23887200  | -2.10912800 | -3.44160700 |
| H                   | 2.27056000  | 1.36092300  | -2.71019400 | H | 1.68345600  | -2.67404600 | -2.82991900 |
| C                   | 3.96688400  | 2.94324800  | -1.23080000 | C | 4.11635000  | 3.28910400  | 0.44639600  |
| H                   | 4.44779300  | 2.75031500  | -2.18963300 | C | 5.32525700  | 3.71373900  | 0.81571900  |
| H                   | 4.40025600  | 3.83621600  | -0.77673400 | H | 3.25425800  | 3.50960300  | 1.07319900  |
| C                   | 4.82455400  | 2.01152800  | 1.04724200  | H | 5.47482600  | 4.28741200  | 1.72634200  |
| H                   | 4.66487800  | 3.05425200  | 1.34784500  | H | 6.20920600  | 3.50132000  | 0.21791600  |
| H                   | 5.87056500  | 1.91565100  | 0.73368400  | C | -2.53328500 | -0.65035100 | 1.12327000  |
| C                   | 2.41284900  | 3.00277900  | -1.28996900 | C | -1.32747600 | -1.28440900 | 1.48517300  |
| C                   | 1.83590300  | 2.34845400  | -2.53597800 | C | -1.06775800 | -1.60047500 | 2.82558300  |
| H                   | 1.96891900  | 3.98778500  | -1.13187400 | C | -2.00138100 | -1.28147200 | 3.80733600  |
| H                   | 0.75737100  | 2.23530400  | -2.44663300 | C | -2.91935200 | -0.36122700 | -0.29405900 |
| H                   | 2.04430900  | 2.97008100  | -3.41344000 | C | -2.35047100 | 0.66124100  | -1.07781600 |
| C                   | 4.56057600  | 1.12340200  | 2.22871800  | C | -2.72592800 | 0.81356000  | -2.42381100 |
| C                   | 5.41604200  | 0.21784300  | 2.70597500  | C | -3.70951800 | -0.00552000 | -2.96829300 |
| H                   | 3.59470700  | 1.25762400  | 2.71279600  | H | -0.14905800 | -2.10051000 | 3.10278200  |
| H                   | 5.17573500  | -0.39457000 | 3.57098000  | H | -1.79869500 | -1.52950900 | 4.84480000  |
| H                   | 6.38714200  | 0.05368100  | 2.24318300  | H | -2.26254200 | 1.57656800  | -3.03761300 |
|                     |             |             |             | H | -4.00893900 | 0.12549300  | -4.00376700 |
|                     |             |             |             | C | -3.19469900 | -0.64364700 | 3.47632000  |
| TS5 <sub>L2Rh</sub> |             |             |             | C | -3.46135200 | -0.33231400 | 2.13918800  |
| C                   | 4.68391700  | 0.23869400  | -0.02388200 | C | -3.91487500 | -1.18337500 | -0.87349600 |
| C                   | 5.55764900  | -0.38842400 | -0.92421700 | C | -4.31744900 | -0.99605400 | -2.19914800 |
| C                   | 6.69650400  | -1.05166200 | -0.46859600 | C | -1.49701200 | 2.15330000  | 1.27220200  |
| C                   | 6.98019600  | -1.10015100 | 0.89803300  | C | -2.71613900 | 2.83201800  | 1.42686200  |
| C                   | 6.12218300  | -0.46941700 | 1.79908700  | C | -0.69896100 | 1.90174300  | 2.39317900  |
| C                   | 4.98491800  | 0.20066200  | 1.34292000  | C | -3.12524400 | 3.25521900  | 2.68906400  |
| H                   | 5.34856000  | -0.36395200 | -1.98895300 |   |             |             |             |

|    |             |             |             |            |             |             |             |
|----|-------------|-------------|-------------|------------|-------------|-------------|-------------|
| H  | -3.35432600 | 3.01695700  | 0.57092200  | H          | -3.90542200 | -0.39266700 | 4.25320100  |
| C  | -1.11525100 | 2.32595400  | 3.65633100  | O          | -4.41282300 | -2.15254700 | -0.06777200 |
| H  | 0.23538900  | 1.37076800  | 2.27935100  | O          | -4.58855800 | 0.29591000  | 1.72273800  |
| C  | -2.32539900 | 3.00340500  | 3.80757600  | C          | -5.40958100 | -3.02693700 | -0.59100400 |
| H  | -4.07096000 | 3.77684700  | 2.80022700  | H          | -5.04023900 | -3.57801100 | -1.46208600 |
| H  | -0.49355500 | 2.11815500  | 4.52221900  | H          | -5.63613200 | -3.72982600 | 0.21178600  |
| H  | -2.64756500 | 3.33245800  | 4.79110700  | H          | -6.31884600 | -2.47739700 | -0.86053400 |
| C  | -0.99579900 | 3.27297100  | -1.28765000 | C          | -5.56497800 | 0.65112100  | 2.69810800  |
| C  | 0.21774400  | 3.96534800  | -1.39732800 | H          | -5.15118300 | 1.33398400  | 3.44755800  |
| C  | -2.17519600 | 3.88806400  | -1.73566600 | H          | -6.36150200 | 1.15603200  | 2.14992400  |
| C  | 0.25952300  | 5.24493700  | -1.95140500 | H          | -5.97225500 | -0.23675000 | 3.19510000  |
| H  | 1.12781700  | 3.49877500  | -1.03933500 |            |             |             |             |
| C  | -2.12976400 | 5.16212700  | -2.30184700 | $5_{L2Rh}$ |             |             |             |
| H  | -3.12678300 | 3.37614200  | -1.65390300 | C          | 4.53544500  | 0.05042900  | 0.08573500  |
| C  | -0.91499300 | 5.84307100  | -2.41132200 | C          | 5.38491300  | -0.88818100 | -0.51593800 |
| H  | 1.20740600  | 5.76952900  | -2.02520400 | C          | 6.36094000  | -1.55005200 | 0.22918100  |
| H  | -3.04703900 | 5.62422200  | -2.65404600 | C          | 6.50919000  | -1.28060200 | 1.59099400  |
| H  | -0.88556900 | 6.83575000  | -2.85013700 | C          | 5.67876600  | -0.33610600 | 2.19534800  |
| C  | -0.95912500 | -2.64011800 | -1.02348100 | C          | 4.70277400  | 0.32690800  | 1.44909900  |
| C  | -0.95021500 | -2.25986500 | -2.37058600 | H          | 5.28528200  | -1.10723500 | -1.57369700 |
| C  | -1.67232300 | -3.78078400 | -0.62750200 | H          | 7.00535600  | -2.27642100 | -0.25732600 |
| C  | -1.62926800 | -3.02122700 | -3.32090200 | H          | 7.26654600  | -1.79766000 | 2.17251800  |
| H  | -0.43081100 | -1.35237900 | -2.66580700 | H          | 5.78826500  | -0.10958300 | 3.25198000  |
| C  | -2.34483500 | -4.54476500 | -1.57958000 | H          | 4.06997300  | 1.06201000  | 1.92984000  |
| H  | -1.70261300 | -4.06579300 | 0.41921400  | C          | 3.52042500  | 0.81382100  | -0.76455400 |
| C  | -2.32222000 | -4.16727800 | -2.92592700 | C          | 2.24392500  | 1.19708600  | 0.00475100  |
| H  | -1.62814800 | -2.71407300 | -4.36209300 | O          | 2.17495900  | 1.91157100  | 0.97699400  |
| H  | -2.89286800 | -5.42966400 | -1.27122900 | H          | 1.93400600  | -1.55996800 | -3.90330300 |
| H  | -2.85253500 | -4.76155500 | -3.66392500 | C          | 2.95727000  | 0.01396200  | -1.95080500 |
| C  | 1.22502700  | -2.67639200 | 0.91295200  | H          | 3.02490700  | 0.47622100  | -2.93148400 |
| C  | 2.07343900  | -2.14470600 | 1.90013100  | H          | 1.16233000  | 1.63128000  | -1.97478700 |
| C  | 1.50093300  | -3.94679100 | 0.38806000  | C          | 4.16416200  | 2.12175900  | -1.33756300 |
| C  | 3.16585900  | -2.87738400 | 2.35969900  | H          | 3.39402600  | 2.62056300  | -1.94087700 |
| H  | 1.89007500  | -1.15470000 | 2.29927000  | H          | 4.95887700  | 1.79801100  | -2.01837600 |
| C  | 2.60229500  | -4.67295000 | 0.84714400  | C          | 2.56259800  | -1.28853000 | -1.85178100 |
| H  | 0.86840200  | -4.37099500 | -0.38242000 | C          | 2.22237600  | -2.15031300 | -3.02916900 |
| C  | 3.43652100  | -4.14197300 | 1.83102600  | H          | 2.71336300  | -1.80199900 | -0.90890900 |
| H  | 3.81433900  | -2.45198400 | 3.11873000  | H          | 3.10899100  | -2.74216000 | -3.29422600 |
| H  | 2.80560600  | -5.65471500 | 0.43014200  | H          | 1.42474100  | -2.85766900 | -2.79696200 |
| H  | 4.29479000  | -4.70666200 | 2.18199400  | C          | 4.71664400  | 3.07163200  | -0.31867600 |
| P  | -0.95816900 | 1.65691000  | -0.41548900 | C          | 6.01465200  | 3.34821700  | -0.18765800 |
| P  | -0.06938700 | -1.60655200 | 0.18728500  | H          | 3.99619200  | 3.54900400  | 0.34190900  |
| Rh | 0.88424900  | 0.25280500  | -0.94388100 | H          | 6.37514900  | 4.05189600  | 0.55780100  |
| H  | -5.07989300 | -1.62678600 | -2.63792400 | H          | 6.76368700  | 2.88049800  | -0.82350500 |



|   |             |             |             |            |             |             |             |
|---|-------------|-------------|-------------|------------|-------------|-------------|-------------|
| C | -2.54522400 | -0.64375200 | 1.12327900  | H          | -1.87431700 | -3.96712700 | 0.17989200  |
| C | -1.35617800 | -1.34450000 | 1.39999100  | C          | -2.51461200 | -3.87144600 | -3.16045300 |
| C | -1.08114800 | -1.78169100 | 2.70310600  | H          | -1.75582000 | -2.38513800 | -4.52799100 |
| C | -1.98010400 | -1.51059000 | 3.73044000  | H          | -3.13755100 | -5.18621700 | -1.56647200 |
| C | -2.95336000 | -0.24369200 | -0.25829000 | H          | -3.08104400 | -4.39811800 | -3.92252800 |
| C | -2.35776900 | 0.80000800  | -0.98852700 | C          | 1.13509800  | -2.71617000 | 0.76790200  |
| C | -2.74589000 | 1.05114100  | -2.31705500 | C          | 2.08865600  | -2.15678800 | 1.63625500  |
| C | -3.76824000 | 0.30611700  | -2.89299700 | C          | 1.25143000  | -4.06036900 | 0.39378700  |
| H | -0.17228200 | -2.32938900 | 2.91614900  | C          | 3.12770600  | -2.93684400 | 2.13735700  |
| H | -1.76628500 | -1.85354600 | 4.73822800  | H          | 2.02773000  | -1.10731000 | 1.90606800  |
| H | -2.25975100 | 1.83145400  | -2.88993000 | C          | 2.30283600  | -4.83555500 | 0.88963400  |
| H | -4.07689300 | 0.51072000  | -3.91360000 | H          | 0.53560200  | -4.50289800 | -0.28884800 |
| C | -3.14759100 | -0.79081800 | 3.48615900  | C          | 3.23920000  | -4.27809800 | 1.76072100  |
| C | -3.42909100 | -0.35858600 | 2.18625800  | H          | 3.86272900  | -2.49035900 | 2.79783600  |
| C | -3.98888200 | -0.99075000 | -0.87003600 | H          | 2.38789500  | -5.87578600 | 0.59014900  |
| C | -4.40199200 | -0.70723600 | -2.17487000 | H          | 4.05804500  | -4.88180200 | 2.13987900  |
| C | -1.23917700 | 2.01594600  | 1.44799700  | P          | -0.90259000 | 1.69335100  | -0.32702900 |
| C | -2.36015500 | 2.79131400  | 1.78390700  | P          | -0.11807400 | -1.58719200 | 0.06328900  |
| C | -0.40124100 | 1.53779000  | 2.46069200  | Rh         | 0.83833500  | 0.38485300  | -1.05832200 |
| C | -2.63428500 | 3.08379600  | 3.11799100  | H          | -5.19347800 | -1.28101900 | -2.63925900 |
| H | -3.02453000 | 3.16041800  | 1.01139500  | H          | -3.82570600 | -0.56993400 | 4.30038000  |
| C | -0.67826300 | 1.83550900  | 3.79460000  | O          | -4.51124900 | -1.98840400 | -0.11638000 |
| H | 0.45873400  | 0.93562100  | 2.20911900  | O          | -4.52657900 | 0.36431100  | 1.85173700  |
| C | -1.79168800 | 2.60893800  | 4.12627300  | C          | -5.54627500 | -2.79416700 | -0.67556300 |
| H | -3.50461100 | 3.68255000  | 3.36838500  | H          | -5.20788500 | -3.30410700 | -1.58352000 |
| H | -0.02612300 | 1.45413500  | 4.57442200  | H          | -5.78722400 | -3.53561300 | 0.08736900  |
| H | -2.00426200 | 2.83911500  | 5.16594900  | H          | -6.43836600 | -2.19763000 | -0.89811800 |
| C | -0.95361400 | 3.38805700  | -1.03018600 | C          | -5.44905400 | 0.70678600  | 2.88327600  |
| C | 0.25017800  | 4.09889600  | -1.14511100 | H          | -4.97033900 | 1.31207000  | 3.66048200  |
| C | -2.16005000 | 4.02654700  | -1.35531800 | H          | -6.23181700 | 1.29212200  | 2.39904700  |
| C | 0.24868700  | 5.42013800  | -1.59093700 | H          | -5.89171000 | -0.18822300 | 3.33531500  |
| H | 1.18664700  | 3.62247900  | -0.88133500 |            |             |             |             |
| C | -2.15562400 | 5.34498800  | -1.81202700 | $6_{L2Rh}$ |             |             |             |
| H | -3.10218000 | 3.49777400  | -1.26705800 | C          | -4.92253700 | 0.03539100  | -0.39896600 |
| C | -0.95332600 | 6.04373000  | -1.93241000 | C          | -5.77133400 | 0.25310000  | 0.69444400  |
| H | 1.18759800  | 5.95898100  | -1.67470500 | C          | -6.76789300 | -0.66478100 | 1.02738000  |
| H | -3.09448100 | 5.82398700  | -2.07277700 | C          | -6.93503500 | -1.82812300 | 0.27507700  |
| H | -0.95311800 | 7.06923600  | -2.28888900 | C          | -6.09037800 | -2.06355500 | -0.81010300 |
| C | -1.05510100 | -2.51869500 | -1.19648200 | C          | -5.09302000 | -1.14397800 | -1.14036500 |
| C | -1.03718700 | -2.06938400 | -2.52446000 | H          | -5.65451400 | 1.15199200  | 1.28698000  |
| C | -1.82830800 | -3.63716900 | -0.85281300 | H          | -7.41547000 | -0.46580900 | 1.87642800  |
| C | -1.76552900 | -2.74381500 | -3.50346400 | H          | -7.71294000 | -2.54130400 | 0.53056200  |
| H | -0.46579800 | -1.18185300 | -2.78563200 | H          | -6.20298700 | -2.96452400 | -1.40586400 |
| C | -2.54612200 | -4.31661400 | -1.83562600 | H          | -4.44271600 | -1.37133600 | -1.97597400 |

|   |             |             |             |    |             |             |             |
|---|-------------|-------------|-------------|----|-------------|-------------|-------------|
| C | -3.77792000 | 1.02191000  | -0.71320900 | H  | 1.54223100  | -4.47570900 | 3.55751300  |
| C | -2.49495700 | 0.47724800  | 0.03744600  | H  | -0.25930600 | -0.73576900 | 4.69196800  |
| O | -2.55580500 | 0.18915000  | 1.20815100  | H  | 0.81267400  | -2.88660200 | 5.32729600  |
| H | -4.83739800 | 4.83026700  | 0.59653200  | C  | -0.89274800 | -3.16950200 | -0.71904200 |
| C | -4.10666000 | 2.41912200  | -0.19289300 | C  | -2.29257400 | -3.16850100 | -0.63711000 |
| H | -4.72111600 | 2.99106700  | -0.88801000 | C  | -0.22573400 | -4.34948100 | -1.07815700 |
| H | -1.70477900 | -0.64534500 | -1.86534600 | C  | -3.01606500 | -4.32598600 | -0.91961200 |
| C | -3.49776000 | 1.12542800  | -2.22842700 | H  | -2.82120700 | -2.26849000 | -0.34824700 |
| H | -4.18836000 | 1.85524900  | -2.66837600 | C  | -0.95474100 | -5.50298100 | -1.37199500 |
| H | -3.69100700 | 0.17979600  | -2.72936400 | H  | 0.85656700  | -4.37317400 | -1.13578700 |
| C | -3.77458500 | 2.98952700  | 0.96759900  | C  | -2.34866800 | -5.49454500 | -1.29333400 |
| C | -4.19095200 | 4.37707800  | 1.35438100  | H  | -4.09899600 | -4.30832200 | -0.84755300 |
| H | -3.17249200 | 2.44474200  | 1.68828800  | H  | -0.42954900 | -6.40915300 | -1.65825800 |
| H | -4.72974800 | 4.37307000  | 2.31010500  | H  | -2.91160500 | -6.39497900 | -1.51985200 |
| H | -3.31550300 | 5.02299500  | 1.49058400  | C  | 2.18158800  | 1.99813300  | -1.31194400 |
| C | -2.07365500 | 1.51963000  | -2.53327100 | C  | 1.84674800  | 1.66964400  | -2.63371200 |
| C | -1.35301100 | 2.45111300  | -1.80936400 | C  | 3.43984500  | 2.55366500  | -1.03740100 |
| H | -1.70752600 | 1.23916500  | -3.51844300 | C  | 2.75094600  | 1.90244900  | -3.66932900 |
| H | -0.45818800 | 2.89061200  | -2.23318100 | H  | 0.88458700  | 1.21200000  | -2.84612400 |
| H | -1.78767500 | 2.97852800  | -0.96956400 | C  | 4.33630500  | 2.80039400  | -2.07617900 |
| C | 2.71902400  | -0.42602500 | 0.94213000  | H  | 3.72000700  | 2.78193800  | -0.01439500 |
| C | 2.08993600  | 0.78916500  | 1.27436500  | C  | 3.99465000  | 2.47361000  | -3.39153700 |
| C | 2.23565700  | 1.32828300  | 2.56003300  | H  | 2.48858700  | 1.63064500  | -4.68712900 |
| C | 2.98507300  | 0.65182000  | 3.51748200  | H  | 5.30652000  | 3.23554800  | -1.85753800 |
| C | 2.71733500  | -0.99911300 | -0.43930900 | H  | 4.70007700  | 2.65612100  | -4.19649700 |
| C | 1.61166700  | -1.63381300 | -1.03188900 | C  | 0.53038700  | 3.19999100  | 0.80641600  |
| C | 1.67371900  | -2.08138600 | -2.36453800 | C  | -0.40559300 | 3.16005000  | 1.85317900  |
| C | 2.85527000  | -1.94588500 | -3.08479100 | C  | 1.02092700  | 4.43517000  | 0.36582600  |
| H | 1.76883500  | 2.26976400  | 2.81660000  | C  | -0.81331100 | 4.33872900  | 2.47434500  |
| H | 3.09897000  | 1.07589300  | 4.51053300  | H  | -0.80746000 | 2.20736100  | 2.18308600  |
| H | 0.80893800  | -2.54185700 | -2.82735500 | C  | 0.59146700  | 5.61546600  | 0.97712800  |
| H | 2.90794000  | -2.30336500 | -4.10861700 | H  | 1.73555000  | 4.48103800  | -0.44789500 |
| C | 3.57939100  | -0.57292900 | 3.22404700  | C  | -0.31686000 | 5.56978500  | 2.03535500  |
| C | 3.44631200  | -1.11009400 | 1.93983000  | H  | -1.52679600 | 4.29748100  | 3.29119800  |
| C | 3.90981500  | -0.87928600 | -1.19261000 | H  | 0.97510400  | 6.56938800  | 0.62818500  |
| C | 3.97837700  | -1.35679000 | -2.50519100 | H  | -0.64137100 | 6.48830300  | 2.51464700  |
| C | 0.27404800  | -2.00827200 | 1.58443300  | P  | -0.01291600 | -1.65319900 | -0.19072100 |
| C | 0.87828700  | -3.22366800 | 1.94323400  | P  | 1.00449000  | 1.61456800  | 0.03808400  |
| C | -0.13769300 | -1.11666500 | 2.58023300  | Rh | -0.84165300 | 0.36093600  | -1.02494100 |
| C | 1.07230200  | -3.53522200 | 3.28678400  | H  | 4.89090000  | -1.26102700 | -3.07931200 |
| H | 1.20581300  | -3.92180400 | 1.18142900  | H  | 4.13928000  | -1.09786800 | 3.98727800  |
| C | 0.05753500  | -1.43530200 | 3.92431700  | O  | 4.94043600  | -0.26766700 | -0.56102400 |
| H | -0.61099900 | -0.18566200 | 2.30151000  | O  | 3.97016700  | -2.30329400 | 1.56360500  |
| C | 0.66167400  | -2.64172100 | 4.28021300  | C  | 6.17279700  | -0.11475500 | -1.26203700 |

|                     |             |             |             |   |             |             |             |
|---------------------|-------------|-------------|-------------|---|-------------|-------------|-------------|
| H                   | 6.04282300  | 0.47761700  | -2.17339400 | C | 2.68007700  | -0.92496400 | -0.51112600 |
| H                   | 6.83769300  | 0.41423100  | -0.57809800 | C | 1.62161500  | -1.63529700 | -1.10637100 |
| H                   | 6.60908600  | -1.08820100 | -1.51348800 | C | 1.69389900  | -2.02192700 | -2.45863900 |
| C                   | 4.66580500  | -3.07365500 | 2.54119000  | C | 2.84138400  | -1.74644800 | -3.19573600 |
| H                   | 4.01876700  | -3.31346200 | 3.39180900  | H | 1.67435600  | 2.05536900  | 3.00152700  |
| H                   | 4.95948800  | -3.99575000 | 2.03778100  | H | 3.06906600  | 0.78237700  | 4.57319200  |
| H                   | 5.56242900  | -2.55280100 | 2.89609600  | H | 0.86617100  | -2.54537200 | -2.92167700 |
|                     |             |             |             | H | 2.90461500  | -2.05974800 | -4.23349500 |
|                     |             |             |             | C | 3.59061700  | -0.74053400 | 3.15407700  |
| TS6 <sub>L2Rh</sub> |             |             |             | C | 3.45890800  | -1.17372200 | 1.83217000  |
| C                   | -4.78627900 | 0.02960100  | -0.23085200 | C | 3.83198500  | -0.65186800 | -1.28466300 |
| C                   | -5.38268700 | 0.44978500  | 0.96831700  | C | 3.91539600  | -1.07150300 | -2.61668500 |
| C                   | -6.34901700 | -0.32700700 | 1.60463700  | C | 0.32863300  | -2.26035500 | 1.49665900  |
| C                   | -6.74576300 | -1.54805000 | 1.05487200  | C | 1.05694400  | -3.42466000 | 1.78401000  |
| C                   | -6.16388500 | -1.97795900 | -0.13659400 | C | -0.21044000 | -1.49613900 | 2.53792100  |
| C                   | -5.19291700 | -1.19839500 | -0.77093800 | C | 1.25767000  | -3.80700600 | 3.10813000  |
| H                   | -5.08545100 | 1.39612600  | 1.40354700  | H | 1.47558100  | -4.02178500 | 0.98159700  |
| H                   | -6.79433800 | 0.02488300  | 2.53074900  | C | -0.00305800 | -1.88370800 | 3.86275700  |
| H                   | -7.50092400 | -2.15330400 | 1.54736200  | H | -0.78708500 | -0.60902000 | 2.30549000  |
| H                   | -6.46281800 | -2.92256100 | -0.58155200 | C | 0.73252400  | -3.03470500 | 4.14900000  |
| H                   | -4.75996400 | -1.57547200 | -1.68871100 | H | 1.82404700  | -4.70665800 | 3.32871300  |
| C                   | -3.66652400 | 0.89060200  | -0.85306000 | H | -0.41478000 | -1.28400000 | 4.66889600  |
| C                   | -2.33740100 | 0.55537100  | -0.04967300 | H | 0.89441600  | -3.33375700 | 5.18025600  |
| O                   | -2.35597300 | 0.51573700  | 1.15591100  | C | -0.85178700 | -3.23990600 | -0.90781600 |
| H                   | -4.76548800 | 4.88293400  | -0.40206000 | C | -2.25185000 | -3.18808500 | -0.95920600 |
| C                   | -4.00822500 | 2.36566000  | -0.66102600 | C | -0.19068600 | -4.41847600 | -1.28303700 |
| H                   | -4.86876100 | 2.66489700  | -1.26014100 | C | -2.98345000 | -4.29610100 | -1.38565700 |
| H                   | -1.58502700 | -0.55413000 | -2.12769000 | H | -2.76918200 | -2.28402200 | -0.65875700 |
| C                   | -3.47504900 | 0.63897100  | -2.36669200 | C | -0.92515600 | -5.51978200 | -1.72437100 |
| H                   | -4.12161200 | 1.31856900  | -2.93198900 | H | 0.89166000  | -4.47478600 | -1.24395400 |
| H                   | -3.77224200 | -0.37175000 | -2.63950200 | C | -2.32013700 | -5.46149600 | -1.77596200 |
| C                   | -3.42356300 | 3.27511000  | 0.12025300  | H | -4.06771200 | -4.24567000 | -1.41288100 |
| C                   | -3.88048600 | 4.70024500  | 0.21548000  | H | -0.40614700 | -6.42492200 | -2.02497100 |
| H                   | -2.57081200 | 3.00221000  | 0.73267900  | H | -2.88703800 | -6.32260600 | -2.11663900 |
| H                   | -4.12116500 | 4.96440800  | 1.25242700  | C | 2.15135100  | 2.37088200  | -0.93803100 |
| H                   | -3.08738700 | 5.38757500  | -0.10193400 | C | 2.22344600  | 2.01958800  | -2.29083700 |
| C                   | -2.03978500 | 0.81984900  | -2.81703400 | C | 3.11116700  | 3.24451600  | -0.40244900 |
| C                   | -1.24087500 | 1.92382500  | -2.41274500 | C | 3.21905400  | 2.55843500  | -3.10808900 |
| H                   | -1.80505000 | 0.36386700  | -3.77784100 | H | 1.51797200  | 1.30792300  | -2.70423300 |
| H                   | -0.40019800 | 2.20646100  | -3.03760700 | C | 4.10037700  | 3.78632700  | -1.21975500 |
| H                   | -1.68433100 | 2.72813300  | -1.83828700 | H | 3.08248900  | 3.50025700  | 0.65210400  |
| C                   | 2.67443500  | -0.45019800 | 0.90725400  | C | 4.15214300  | 3.44880700  | -2.57595400 |
| C                   | 1.99648900  | 0.70374900  | 1.34436500  | H | 3.26908100  | 2.27321200  | -4.15439900 |
| C                   | 2.15923100  | 1.15035900  | 2.66361200  | H | 4.83353900  | 4.46771900  | -0.79907100 |
| C                   | 2.95185800  | 0.43110300  | 3.55247700  |   |             |             |             |

|            |             |             |             |   |             |             |             |
|------------|-------------|-------------|-------------|---|-------------|-------------|-------------|
| H          | 4.92491900  | 3.87112700  | -3.21114400 | C | -4.22088100 | 2.16044800  | -0.44389800 |
| C          | 0.15185400  | 2.97051000  | 1.10422300  | H | -5.22982900 | 2.29024100  | -0.83666900 |
| C          | -0.55558300 | 2.69872400  | 2.28771000  | H | -1.69096900 | -0.24700000 | -2.52393700 |
| C          | 0.17730700  | 4.28237800  | 0.60882900  | C | -3.64152300 | 0.54045900  | -2.22558700 |
| C          | -1.18671800 | 3.72965100  | 2.98228300  | H | -4.34707600 | 1.22882700  | -2.69960200 |
| H          | -0.61573200 | 1.68628300  | 2.66611800  | H | -3.95726300 | -0.46413000 | -2.50242100 |
| C          | -0.46554900 | 5.30850900  | 1.30310000  | C | -3.61520300 | 3.19541400  | 0.13776000  |
| H          | 0.70471500  | 4.50844800  | -0.31090600 | C | -4.23376000 | 4.55192200  | 0.29540300  |
| C          | -1.14030300 | 5.03737700  | 2.49449700  | H | -2.61163500 | 3.08278400  | 0.53103900  |
| H          | -1.72123400 | 3.50705200  | 3.90071600  | H | -4.28370400 | 4.83803100  | 1.35318900  |
| H          | -0.43340300 | 6.32091200  | 0.91234400  | H | -3.62807100 | 5.31823700  | -0.20401200 |
| H          | -1.63433700 | 5.83853100  | 3.03538700  | C | -2.25193700 | 0.75162900  | -2.81610500 |
| P          | 0.01412700  | -1.77610100 | -0.23682200 | C | -1.45571600 | 1.92324700  | -2.35077400 |
| P          | 0.89876500  | 1.59789900  | 0.15802700  | H | -2.22961900 | 0.59311700  | -3.89982600 |
| Rh         | -0.70360300 | 0.29130900  | -1.09183600 | H | -0.71757900 | 2.29905700  | -3.05871500 |
| H          | 4.79861900  | -0.86135400 | -3.20607900 | H | -2.00016800 | 2.72286100  | -1.85991500 |
| H          | 4.18817200  | -1.29871100 | 3.86341500  | C | 2.51275500  | -0.35736000 | 1.10654700  |
| O          | 4.80551300  | 0.04849300  | -0.65439400 | C | 1.74031600  | 0.76975400  | 1.45865400  |
| O          | 4.03895700  | -2.30011500 | 1.34517400  | C | 1.69242700  | 1.19111400  | 2.79569000  |
| C          | 5.98144300  | 0.39044500  | -1.38632100 | C | 2.37114000  | 0.48073000  | 3.78069900  |
| H          | 5.74189200  | 0.99487500  | -2.26666600 | C | 2.73540400  | -0.82212200 | -0.29834800 |
| H          | 6.59460200  | 0.97768400  | -0.70172500 | C | 1.78257800  | -1.53988100 | -1.04457600 |
| H          | 6.53367500  | -0.50590500 | -1.69125800 | C | 2.05987700  | -1.91994800 | -2.36959400 |
| C          | 4.78997900  | -3.11622000 | 2.24114000  | C | 3.30146800  | -1.63154700 | -2.92836600 |
| H          | 4.17279400  | -3.45987400 | 3.07812200  | H | 1.14392700  | 2.07792600  | 3.07491700  |
| H          | 5.11725100  | -3.97617700 | 1.65513100  | H | 2.32354500  | 0.81491600  | 4.81257200  |
| H          | 5.66768300  | -2.58426900 | 2.62569700  | H | 1.31593200  | -2.45055900 | -2.95187800 |
|            |             |             |             | H | 3.51904500  | -1.93742800 | -3.94736900 |
|            |             |             |             | C | 3.11040600  | -0.65392500 | 3.46000100  |
| $7_{L2Rh}$ |             |             |             | C | 3.19126400  | -1.06216100 | 2.12598700  |
| C          | -4.63748900 | -0.24602700 | 0.03318100  | C | 3.99235900  | -0.54840000 | -0.88556000 |
| C          | -5.09049400 | 0.07912500  | 1.32311100  | C | 4.27528000  | -0.95772900 | -2.19288200 |
| C          | -5.89327200 | -0.79683800 | 2.04991900  | C | 0.26470900  | -2.36883800 | 1.32351900  |
| C          | -6.27022800 | -2.02552400 | 1.50202800  | C | 1.05087000  | -3.50372800 | 1.57419100  |
| C          | -5.83918700 | -2.35753900 | 0.21932100  | C | -0.41814400 | -1.74814500 | 2.37691300  |
| C          | -5.03245100 | -1.47655600 | -0.50692900 | C | 1.15665600  | -4.00533700 | 2.86939000  |
| H          | -4.80742800 | 1.03018900  | 1.75710700  | H | 1.59273400  | -3.98433700 | 0.76814300  |
| H          | -6.22696300 | -0.51723400 | 3.04508800  | C | -0.30231600 | -2.25188200 | 3.67370700  |
| H          | -6.89659100 | -2.71025900 | 2.06599200  | H | -1.01851500 | -0.86827500 | 2.18322800  |
| H          | -6.12760500 | -3.30471400 | -0.22707700 | C | 0.48402900  | -3.37765700 | 3.92211000  |
| H          | -4.72676200 | -1.77612900 | -1.50075700 | H | 1.76853100  | -4.88208000 | 3.05869800  |
| C          | -3.69835200 | 0.74462800  | -0.68839400 | H | -0.82434900 | -1.75980900 | 4.48893900  |
| C          | -2.27401300 | 0.60271800  | 0.02061300  | H | 0.57382500  | -3.76688300 | 4.93192700  |
| O          | -2.21377300 | 0.64110100  | 1.22651700  | C | -0.68945800 | -3.12111800 | -1.27476300 |
| H          | -5.24632200 | 4.58733100  | -0.11866700 |   |             |             |             |

|    |             |             |             |                     |             |             |             |
|----|-------------|-------------|-------------|---------------------|-------------|-------------|-------------|
| C  | -2.05037900 | -2.99917700 | -1.58578400 | H                   | 3.92213200  | -3.31062000 | 3.45063000  |
| C  | -0.01938200 | -4.31502000 | -1.58409900 | H                   | 5.07385500  | -3.72300800 | 2.15204200  |
| C  | -2.73733600 | -4.05192600 | -2.19134100 | H                   | 5.37398300  | -2.29775700 | 3.18357900  |
| H  | -2.57238500 | -2.08119100 | -1.34208700 |                     |             |             |             |
| C  | -0.70383600 | -5.36022200 | -2.20338100 | TS7 <sub>L2Rh</sub> |             |             |             |
| H  | 1.03560200  | -4.42509200 | -1.36007100 | C                   | 2.68743900  | 0.40019800  | -0.04502400 |
| C  | -2.06292700 | -5.23289900 | -2.50511100 | O                   | 2.71694000  | 1.10662800  | 0.95918700  |
| H  | -3.79486000 | -3.94829200 | -2.41548800 | H                   | 5.53782800  | -3.32422400 | 2.94871800  |
| H  | -0.17577400 | -6.27693100 | -2.44812100 | C                   | 5.20282000  | 0.02174400  | -0.35839600 |
| H  | -2.59180100 | -6.05231500 | -2.98232100 | C                   | 6.30347600  | -0.77395600 | -0.72292400 |
| C  | 2.11149500  | 2.20939200  | -0.98544300 | C                   | 7.58420400  | -0.23640700 | -0.82108100 |
| C  | 2.05755600  | 1.87402200  | -2.34385100 | C                   | 7.79973200  | 1.11879400  | -0.55462400 |
| C  | 3.20742300  | 2.93351400  | -0.49390800 | C                   | 6.72014800  | 1.91733000  | -0.18491000 |
| C  | 3.07549900  | 2.27508100  | -3.20888600 | C                   | 5.43438900  | 1.37443600  | -0.08642000 |
| H  | 1.23362800  | 1.27417100  | -2.71772400 | H                   | 6.15601300  | -1.83117300 | -0.91856800 |
| C  | 4.21896800  | 3.34118300  | -1.36090800 | H                   | 8.41495100  | -0.87674800 | -1.10368000 |
| H  | 3.26713300  | 3.17614100  | 0.56236500  | H                   | 8.79720400  | 1.54142300  | -0.63063900 |
| C  | 4.15301000  | 3.01536300  | -2.71917500 | H                   | 6.86993900  | 2.97105000  | 0.03286100  |
| H  | 3.03162300  | 2.00082500  | -4.25838200 | H                   | 4.61829600  | 2.01511800  | 0.21968800  |
| H  | 5.06267700  | 3.90605600  | -0.97666900 | C                   | 3.81837000  | -0.65956300 | -0.32507800 |
| H  | 4.94534100  | 3.33073000  | -3.39129800 | C                   | 3.49279500  | -1.18381700 | -1.73532800 |
| C  | 0.10853700  | 3.18373000  | 0.88339700  | H                   | 2.56587400  | -1.78143200 | -1.67123600 |
| C  | -0.68821900 | 3.15574300  | 2.04101600  | H                   | 4.26639500  | -1.84214100 | -2.13400500 |
| C  | 0.28735300  | 4.40304500  | 0.21044500  | C                   | 3.76626500  | -1.76128000 | 0.71060100  |
| C  | -1.24682300 | 4.33221900  | 2.54030300  | H                   | 2.72120700  | -0.20488700 | -3.52671600 |
| H  | -0.89383500 | 2.21930100  | 2.54114300  | H                   | 3.04953400  | -2.55632300 | 0.51218000  |
| C  | -0.29419900 | 5.57222700  | 0.70206600  | C                   | 3.25876000  | 0.05911500  | -2.61165200 |
| H  | 0.88330300  | 4.44541700  | -0.69370800 | C                   | 2.46893200  | 1.06181100  | -1.76887900 |
| C  | -1.05200200 | 5.54307000  | 1.87405000  | H                   | 4.22273500  | 0.48631400  | -2.90387600 |
| H  | -1.85092300 | 4.29468800  | 3.44148700  | H                   | 1.54209600  | 1.39191600  | -2.25778000 |
| H  | -0.14570900 | 6.50712400  | 0.17033600  | H                   | 2.99936200  | 1.97921200  | -1.52232400 |
| H  | -1.49538200 | 6.45560400  | 2.26022700  | C                   | 4.52501600  | -1.81697300 | 1.80986300  |
| P  | 0.08348000  | -1.72247900 | -0.38089200 | C                   | 4.52183400  | -2.93412200 | 2.80778800  |
| P  | 0.78725500  | 1.65167800  | 0.14925100  | H                   | 5.23294700  | -1.01176200 | 1.99948900  |
| Rh | -0.69866100 | 0.42051200  | -1.12038500 | H                   | 3.87943900  | -3.75896100 | 2.49272800  |
| H  | 5.23613300  | -0.74179100 | -2.64202500 | H                   | 4.18372400  | -2.58751500 | 3.79334700  |
| H  | 3.62347000  | -1.20352500 | 4.23847100  | C                   | -2.99390100 | -0.04444100 | 0.81479400  |
| O  | 4.86440500  | 0.13796800  | -0.10771200 | C                   | -2.14846600 | -1.11821200 | 1.14846500  |
| O  | 3.89583100  | -2.14595400 | 1.71492700  | C                   | -2.26178800 | -1.74261300 | 2.39782800  |
| C  | 6.15775500  | 0.43134900  | -0.63056500 | C                   | -3.19128800 | -1.27502100 | 3.32228200  |
| H  | 6.09566900  | 1.05472700  | -1.52835500 | C                   | -2.99840900 | 0.55589400  | -0.55073700 |
| H  | 6.67615700  | 0.98213400  | 0.15536900  | C                   | -1.95224400 | 1.34271500  | -1.05666800 |
| H  | 6.71154900  | -0.48717500 | -0.85679500 | C                   | -1.95041800 | 1.73707200  | -2.40886600 |
| C  | 4.60178800  | -2.90293400 | 2.69478600  | C                   | -3.01859700 | 1.40050000  | -3.23041900 |

|   |             |             |             |                 |             |             |             |
|---|-------------|-------------|-------------|-----------------|-------------|-------------|-------------|
| H | -1.63410300 | -2.58528900 | 2.65264200  | C               | 1.21451300  | -4.09566700 | 2.48730000  |
| H | -3.28006200 | -1.76214100 | 4.28846300  | H               | 0.77173800  | -1.99680900 | 2.35739300  |
| H | -1.12116200 | 2.30553500  | -2.81195500 | C               | 0.43573800  | -5.46421900 | 0.65254900  |
| H | -3.02061600 | 1.71530200  | -4.26935500 | H               | -0.70362900 | -4.45305000 | -0.86478000 |
| C | -3.99958800 | -0.17825800 | 3.03253200  | C               | 1.10746000  | -5.34502200 | 1.86979800  |
| C | -3.90133300 | 0.43593800  | 1.77970600  | H               | 1.73524800  | -3.99720800 | 3.43334600  |
| C | -4.07724100 | 0.22607600  | -1.40746400 | H               | 0.35354000  | -6.43132100 | 0.16605000  |
| C | -4.09020600 | 0.65557400  | -2.73720400 | H               | 1.54829700  | -6.22052900 | 2.33647200  |
| C | -0.80823100 | 1.82523500  | 1.67470600  | P               | -0.41886200 | 1.62972700  | -0.09826900 |
| C | -1.69975900 | 2.83254600  | 2.07468200  | P               | -0.83121000 | -1.60176400 | -0.03540600 |
| C | -0.16591600 | 1.03591500  | 2.63356200  | Rh              | 0.80921800  | -0.10655600 | -0.77415200 |
| C | -1.96338700 | 3.02504400  | 3.42831000  | H               | -4.91245900 | 0.39814400  | -3.39224600 |
| H | -2.19356800 | 3.45245300  | 1.33403500  | H               | -4.69722700 | 0.18881900  | 3.77443500  |
| C | -0.43278800 | 1.23548300  | 3.98867500  | O               | -5.04504100 | -0.54477000 | -0.85632500 |
| H | 0.53845100  | 0.27660200  | 2.31529500  | O               | -4.62193500 | 1.52321800  | 1.41030900  |
| C | -1.33286300 | 2.22508200  | 4.38648700  | C               | -6.14272600 | -0.94364000 | -1.67549500 |
| H | -2.65842700 | 3.80009400  | 3.73624900  | H               | -5.80371800 | -1.52515900 | -2.53904200 |
| H | 0.06242900  | 0.61665100  | 4.73081600  | H               | -6.77246700 | -1.56885600 | -1.04133100 |
| H | -1.54032800 | 2.37765800  | 5.44135000  | H               | -6.71832800 | -0.07620400 | -2.01773700 |
| C | 0.13118600  | 3.33192300  | -0.51467700 | C               | -5.52640000 | 2.08462800  | 2.35985300  |
| C | 1.42615800  | 3.72273500  | -0.13636300 | H               | -5.00236300 | 2.40536700  | 3.26686600  |
| C | -0.74065000 | 4.28694100  | -1.06103300 | H               | -5.96976300 | 2.95275800  | 1.87045800  |
| C | 1.85158900  | 5.03454800  | -0.34103200 | H               | -6.31721700 | 1.37376400  | 2.62503600  |
| H | 2.08441400  | 3.00442400  | 0.33762900  |                 |             |             |             |
| C | -0.30891400 | 5.59939400  | -1.25799700 | $\delta_{L2Rh}$ |             |             |             |
| H | -1.75679600 | 4.02018100  | -1.32336100 | C               | 3.60425600  | 0.90049900  | -1.11227400 |
| C | 0.98894100  | 5.97460400  | -0.90852500 | O               | 3.53570400  | 2.11763000  | -1.11926300 |
| H | 2.85705200  | 5.32207600  | -0.04834100 | H               | 4.59359700  | 0.53309800  | 4.52289400  |
| H | -0.99411200 | 6.32822600  | -1.68017900 | C               | 5.77835800  | 0.02860700  | -0.29530000 |
| H | 1.32167100  | 6.99622200  | -1.06529500 | C               | 6.50612000  | -1.15987000 | -0.42385000 |
| C | -1.74192900 | -2.17941200 | -1.51014400 | C               | 7.88429700  | -1.13183600 | -0.65495000 |
| C | -1.23774100 | -1.85346200 | -2.77714200 | C               | 8.55609700  | 0.08491900  | -0.76562000 |
| C | -2.92357300 | -2.92609500 | -1.40115200 | C               | 7.83850700  | 1.27772600  | -0.64345900 |
| C | -1.91048800 | -2.26433400 | -3.92800100 | C               | 6.46500000  | 1.24812600  | -0.41159000 |
| H | -0.33079100 | -1.25545700 | -2.84508600 | H               | 6.01092600  | -2.12009600 | -0.34187400 |
| C | -3.58889000 | -3.34203400 | -2.55336900 | H               | 8.42916900  | -2.06676900 | -0.74807100 |
| H | -3.32522300 | -3.16974600 | -0.42328900 | H               | 9.62675400  | 0.10540600  | -0.94600900 |
| C | -3.08690000 | -3.00821200 | -3.81514500 | H               | 8.34863000  | 2.23285800  | -0.72821000 |
| H | -1.52325400 | -1.99762900 | -4.90660800 | H               | 5.91384800  | 2.17711600  | -0.31477700 |
| H | -4.50371300 | -3.92006600 | -2.46758400 | C               | 4.27073700  | 0.05086600  | -0.00022600 |
| H | -3.61504300 | -3.32581700 | -4.70909300 | C               | 3.56670200  | -1.31095100 | -0.22787000 |
| C | -0.05336300 | -3.09012500 | 0.68187400  | H               | 2.57762000  | -1.26001700 | 0.23791900  |
| C | 0.66316400  | -2.96719500 | 1.88464900  | H               | 4.07925200  | -2.14999000 | 0.24411500  |
| C | -0.15483900 | -4.34450800 | 0.06364000  | C               | 3.95336300  | 0.61435400  | 1.36499700  |

|   |             |             |             |    |             |             |             |
|---|-------------|-------------|-------------|----|-------------|-------------|-------------|
| H | 2.63330200  | -2.17579500 | -2.01832600 | C  | -1.19839300 | 5.49896200  | -1.63387500 |
| H | 2.89639600  | 0.85978300  | 1.51699700  | H  | -2.60451400 | 4.24212500  | -0.60744700 |
| C | 3.38911100  | -1.43365100 | -1.74938800 | C  | 0.09391000  | 5.61674400  | -2.15487700 |
| C | 2.99239600  | -0.01157900 | -2.15929100 | H  | 1.99419500  | 4.63209400  | -2.44722500 |
| H | 4.33125000  | -1.72170500 | -2.22470000 | H  | -1.89274800 | 6.33049600  | -1.70829900 |
| H | 1.90378300  | 0.12834400  | -2.05200900 | H  | 0.40348600  | 6.54108600  | -2.63327700 |
| H | 3.26728800  | 0.29668900  | -3.17157300 | C  | -0.84959600 | -2.28293500 | -1.16274500 |
| C | 4.78678700  | 0.77636800  | 2.39475300  | C  | -0.34342700 | -1.84291000 | -2.39076600 |
| C | 4.37118000  | 1.27546200  | 3.74587100  | C  | -1.65398200 | -3.43173100 | -1.11499500 |
| H | 5.84140000  | 0.53662400  | 2.26945600  | C  | -0.63556000 | -2.54155300 | -3.56206700 |
| H | 3.29973800  | 1.49918500  | 3.78198400  | H  | 0.25112400  | -0.93787000 | -2.42477800 |
| H | 4.92207500  | 2.18496200  | 4.01686700  | C  | -1.93634700 | -4.13387700 | -2.28544300 |
| C | -3.19061200 | -0.70211500 | 0.54397500  | H  | -2.06401400 | -3.76993100 | -0.16914700 |
| C | -2.10488000 | -1.29285100 | 1.21624100  | C  | -1.43043200 | -3.68832800 | -3.51020400 |
| C | -2.24176300 | -1.73424900 | 2.54019100  | H  | -0.25128900 | -2.18506500 | -4.51290700 |
| C | -3.45778400 | -1.57799500 | 3.19820500  | H  | -2.55895400 | -5.02220200 | -2.24328400 |
| C | -3.11729200 | -0.25275000 | -0.87934800 | H  | -1.66013600 | -4.23183900 | -4.42179100 |
| C | -2.33679500 | 0.83840900  | -1.30157400 | C  | 0.58206800  | -2.48453400 | 1.36915600  |
| C | -2.30140400 | 1.21175300  | -2.65359200 | C  | 1.07911400  | -1.99849100 | 2.59225200  |
| C | -3.04752000 | 0.49871200  | -3.58645500 | C  | 1.01801800  | -3.72997800 | 0.89838100  |
| H | -1.41210700 | -2.20520600 | 3.05072600  | C  | 1.98557200  | -2.75181800 | 3.33513800  |
| H | -3.56725800 | -1.92793900 | 4.22024400  | H  | 0.76356500  | -1.02331100 | 2.95123700  |
| H | -1.69367300 | 2.05118800  | -2.97043300 | C  | 1.93270200  | -4.47787400 | 1.64238700  |
| H | -3.02461200 | 0.78807600  | -4.63278800 | H  | 0.65558700  | -4.11462300 | -0.04759100 |
| C | -4.54029300 | -0.97279000 | 2.56230300  | C  | 2.41763900  | -3.99271700 | 2.85813200  |
| C | -4.40715600 | -0.53232800 | 1.24170700  | H  | 2.36011100  | -2.36763300 | 4.27899100  |
| C | -3.85732800 | -0.96908500 | -1.84805600 | H  | 2.26701100  | -5.44071300 | 1.26813400  |
| C | -3.82267200 | -0.59196300 | -3.19468100 | H  | 3.13159800  | -4.57646700 | 3.43099500  |
| C | -2.19036500 | 2.10741900  | 1.31124000  | P  | -1.17101200 | 1.63853800  | -0.13574000 |
| C | -3.51173100 | 2.55376200  | 1.16126400  | P  | -0.47357900 | -1.36484100 | 0.37616900  |
| C | -1.62160500 | 2.04461500  | 2.58987700  | Rh | 0.67271900  | 0.49182800  | 0.22203200  |
| C | -4.24893600 | 2.93891600  | 2.27988100  | H  | -4.38617600 | -1.14428400 | -3.93558400 |
| H | -3.97539200 | 2.56953700  | 0.18141400  | H  | -5.47468600 | -0.84721800 | 3.09419000  |
| C | -2.36538000 | 2.42248500  | 3.70835400  | O  | -4.55615400 | -2.03325100 | -1.38343100 |
| H | -0.60339900 | 1.68014200  | 2.69847300  | O  | -5.39219900 | 0.09935100  | 0.55644600  |
| C | -3.67908400 | 2.87099400  | 3.55378500  | C  | -5.28579500 | -2.82423000 | -2.31822100 |
| H | -5.27185500 | 3.28131300  | 2.15714200  | H  | -4.62629800 | -3.24673000 | -3.08381600 |
| H | -1.92291900 | 2.36079200  | 4.69810700  | H  | -5.73141500 | -3.63304800 | -1.73763000 |
| H | -4.25931000 | 3.16175800  | 4.42436200  | H  | -6.08017000 | -2.24137100 | -2.79831800 |
| C | -0.71458000 | 3.23551800  | -0.91926900 | C  | -6.63523200 | 0.32962500  | 1.21540800  |
| C | 0.58083200  | 3.36093300  | -1.44239700 | H  | -6.50251100 | 0.93594800  | 2.11797400  |
| C | -1.60258700 | 4.31752400  | -1.01375800 | H  | -7.25316900 | 0.87429800  | 0.50021900  |
| C | 0.98559100  | 4.54809200  | -2.05450400 | H  | -7.12811400 | -0.61384200 | 1.47677300  |
| H | 1.28176500  | 2.53480300  | -1.36433500 |    |             |             |             |

|                             |             |             |             |   |             |             |             |
|-----------------------------|-------------|-------------|-------------|---|-------------|-------------|-------------|
| ${}^9\text{L}_{2\text{Rh}}$ |             |             |             | H | -2.42919400 | -0.07364900 | -4.73528900 |
| C                           | 5.29905500  | 0.82883100  | -0.18904300 | C | -3.91318400 | -1.71821200 | 2.51742200  |
| C                           | 5.73521700  | 0.52626600  | -1.48987600 | C | -3.83881800 | -1.25836000 | 1.19942900  |
| C                           | 7.05521200  | 0.15993400  | -1.74077000 | C | -3.06220600 | -1.76615700 | -1.86445500 |
| C                           | 7.97553200  | 0.08657800  | -0.69144600 | C | -3.00498300 | -1.49821600 | -3.23439100 |
| C                           | 7.55695700  | 0.38133800  | 0.60474300  | C | -2.35345000 | 1.66404000  | 1.31759300  |
| C                           | 6.23045800  | 0.74577500  | 0.85367500  | C | -3.69165500 | 2.08334500  | 1.29386300  |
| H                           | 5.03349300  | 0.57386800  | -2.31707100 | C | -1.75113100 | 1.34714100  | 2.54104200  |
| H                           | 7.36548800  | -0.07071000 | -2.75583600 | C | -4.41672800 | 2.17282100  | 2.48042600  |
| H                           | 9.00585600  | -0.19694100 | -0.88466800 | H | -4.16657800 | 2.33658800  | 0.35230700  |
| H                           | 8.26056900  | 0.33069000  | 1.43073300  | C | -2.47851600 | 1.43878600  | 3.72813000  |
| H                           | 5.93689600  | 0.96853100  | 1.87250900  | H | -0.72275200 | 1.00461800  | 2.56163500  |
| C                           | 3.84376800  | 1.20469300  | 0.03827900  | C | -3.81163600 | 1.85100500  | 3.69924100  |
| C                           | 2.86902100  | 0.05667400  | -0.39127900 | H | -5.45297700 | 2.49601400  | 2.45490900  |
| O                           | 3.22997300  | -1.01713600 | -0.80917600 | H | -2.00580300 | 1.18138300  | 4.67110900  |
| H                           | 0.85466700  | 0.62935400  | -1.92840500 | H | -4.37874200 | 1.92188000  | 4.62246200  |
| C                           | 3.41592100  | 2.44362800  | -0.81178600 | C | -1.70766600 | 3.29043900  | -0.89355100 |
| H                           | 3.99346000  | 2.46146300  | -1.74046400 | C | -0.90940800 | 4.34606300  | -0.42374800 |
| H                           | 3.67465800  | 3.34928300  | -0.25584600 | C | -2.78069100 | 3.58054200  | -1.75001700 |
| C                           | 3.50890000  | 1.46967100  | 1.52958000  | C | -1.16028400 | 5.65901500  | -0.82260300 |
| H                           | 4.11857900  | 2.30409100  | 1.88793800  | H | -0.10417700 | 4.14344000  | 0.27423800  |
| H                           | 3.76639700  | 0.58061500  | 2.11568700  | C | -3.02661800 | 4.89427100  | -2.15110600 |
| C                           | 1.92861400  | 2.44326900  | -1.14480700 | H | -3.42903600 | 2.78659000  | -2.10106900 |
| C                           | 1.42646200  | 1.67878500  | -2.27954000 | C | -2.21450600 | 5.93476100  | -1.69554800 |
| H                           | 1.40148700  | 3.36358700  | -0.92663100 | H | -0.53286500 | 6.46366600  | -0.45108300 |
| H                           | 0.59871700  | 2.13040900  | -2.82555600 | H | -3.85919000 | 5.10377700  | -2.81603800 |
| H                           | 2.17524100  | 1.22517900  | -2.93215300 | H | -2.40773400 | 6.95532400  | -2.01168200 |
| C                           | 2.05933700  | 1.78981800  | 1.74406400  | C | 0.07011300  | -2.61651300 | -1.04359600 |
| C                           | 1.56633100  | 2.94683100  | 2.20066700  | C | 0.58510600  | -2.29570900 | -2.30505700 |
| H                           | 1.33148800  | 0.93013900  | 1.68626700  | C | -0.54844400 | -3.86133300 | -0.84933900 |
| H                           | 0.50022700  | 3.09835600  | 2.32830600  | C | 0.47926700  | -3.20201500 | -3.36031600 |
| H                           | 2.22542600  | 3.76709200  | 2.47549400  | H | 1.07147700  | -1.34207800 | -2.46392500 |
| Rh                          | 0.97903100  | 0.77442600  | -0.21911800 | C | -0.64284200 | -4.76995400 | -1.90188500 |
| C                           | -2.60454600 | -1.22047500 | 0.51716700  | H | -0.96073400 | -4.11639100 | 0.12105200  |
| C                           | -1.43591800 | -1.62598400 | 1.18891100  | C | -0.13351100 | -4.44036000 | -3.16076800 |
| C                           | -1.51998000 | -2.09745900 | 2.50763100  | H | 0.87616000  | -2.93983100 | -4.33646200 |
| C                           | -2.75088500 | -2.14638000 | 3.15523000  | H | -1.12228100 | -5.73071200 | -1.74138900 |
| C                           | -2.60162500 | -0.81686000 | -0.92025500 | H | -0.21417900 | -5.14656600 | -3.98173600 |
| C                           | -2.13805600 | 0.42708000  | -1.37705800 | C | 1.39638300  | -2.22029700 | 1.51389900  |
| C                           | -2.05869600 | 0.68020600  | -2.75934600 | C | 1.68773600  | -1.56992900 | 2.72566700  |
| C                           | -2.48870900 | -0.27785600 | -3.67032900 | C | 2.10362700  | -3.38124800 | 1.18186200  |
| H                           | -0.63281300 | -2.43110900 | 3.02855100  | C | 2.65944500  | -2.07513800 | 3.58733700  |
| H                           | -2.80784800 | -2.51685700 | 4.17441800  | H | 1.14800900  | -0.67160100 | 3.00778500  |
| H                           | -1.66351000 | 1.62112600  | -3.12088900 | C | 3.08451900  | -3.88062500 | 2.04181800  |



|                     |             |             |             |   |             |             |             |
|---------------------|-------------|-------------|-------------|---|-------------|-------------|-------------|
| H                   | 1.90283500  | -3.89194500 | 0.24784600  | H | 1.67028600  | 3.95444000  | -0.50260600 |
| C                   | 3.36629600  | -3.23086100 | 3.24341700  | H | 0.44842300  | 3.08889900  | -2.24025000 |
| H                   | 2.86634300  | -1.56438500 | 4.52307400  | H | 2.12399200  | 2.89491700  | -2.79783500 |
| H                   | 3.62932100  | -4.77883900 | 1.76696900  | C | 1.84706600  | 1.42940200  | 1.77358700  |
| H                   | 4.12988200  | -3.62073400 | 3.90958500  | C | 1.37553000  | 2.71978300  | 1.36392500  |
| P                   | -1.35255000 | 1.61844900  | -0.21938500 | H | 1.33325600  | 0.93396000  | 2.59083700  |
| P                   | 0.20295700  | -1.44016400 | 0.35414200  | H | 0.35990400  | 3.00099500  | 1.61305600  |
| H                   | -3.34285800 | -2.23013000 | -3.95674200 | H | 2.06563800  | 3.55211400  | 1.43720900  |
| H                   | -4.85919000 | -1.74632000 | 3.04265600  | C | -2.41198700 | -1.40841300 | 0.58789500  |
| O                   | -3.52817500 | -2.92810300 | -1.34293800 | C | -1.16341600 | -1.70087900 | 1.17388000  |
| O                   | -4.90615000 | -0.80477500 | 0.49471600  | C | -1.11368500 | -2.22418800 | 2.47459200  |
| C                   | -4.01155000 | -3.92627600 | -2.23795200 | C | -2.28713900 | -2.43323500 | 3.19267800  |
| H                   | -3.22864000 | -4.25818000 | -2.92730400 | C | -2.55582200 | -0.95328200 | -0.82635600 |
| H                   | -4.31850500 | -4.76372200 | -1.60987100 | C | -2.21415500 | 0.33691600  | -1.25933800 |
| H                   | -4.87515300 | -3.56345400 | -2.80733300 | C | -2.25010100 | 0.65286300  | -2.62993800 |
| C                   | -6.17842900 | -0.78349400 | 1.13641200  | C | -2.69746100 | -0.28928700 | -3.54879200 |
| H                   | -6.16286800 | -0.15186200 | 2.03113300  | H | -0.16807700 | -2.49030200 | 2.92405600  |
| H                   | -6.87178000 | -0.36157000 | 0.40742700  | H | -2.23622700 | -2.84244400 | 4.19719700  |
| H                   | -6.50659700 | -1.79419200 | 1.40569300  | H | -1.94655000 | 1.63506100  | -2.97193600 |
|                     |             |             |             | H | -2.73311900 | -0.03911800 | -4.60483900 |
|                     |             |             |             | C | -3.52751300 | -2.12183200 | 2.64196900  |
| TS8 <sub>L2Rh</sub> |             |             |             | C | -3.58846000 | -1.61605200 | 1.34070400  |
| C                   | 5.25827300  | 0.95813200  | -0.01753600 | C | -3.03500100 | -1.88784100 | -1.77579600 |
| C                   | 5.75555000  | 0.85297000  | -1.32774600 | C | -3.11142400 | -1.55382400 | -3.13014400 |
| C                   | 7.08327400  | 0.50544400  | -1.56772900 | C | -2.49537600 | 1.46436300  | 1.46075400  |
| C                   | 7.94972300  | 0.25662900  | -0.50008600 | C | -3.88386100 | 1.66284400  | 1.46462700  |
| C                   | 7.47096900  | 0.35825900  | 0.80532900  | C | -1.82900100 | 1.24850600  | 2.67379300  |
| C                   | 6.13774600  | 0.70302400  | 1.04313600  | C | -4.59107100 | 1.63597900  | 2.66473100  |
| H                   | 5.09651100  | 1.03675900  | -2.16973600 | H | -4.41547200 | 1.82688600  | 0.53486300  |
| H                   | 7.44167400  | 0.42704100  | -2.59019900 | C | -2.53921100 | 1.22081700  | 3.87449400  |
| H                   | 8.98540900  | -0.01218900 | -0.68589400 | H | -0.75971600 | 1.07816600  | 2.67513300  |
| H                   | 8.13284100  | 0.17014800  | 1.64584300  | C | -3.92128400 | 1.41420900  | 3.87161200  |
| H                   | 5.79315800  | 0.77372400  | 2.06812300  | H | -5.66599000 | 1.78880300  | 2.65850000  |
| C                   | 3.80133700  | 1.31832400  | 0.20824200  | H | -2.01351600 | 1.04248400  | 4.80774500  |
| C                   | 2.80730500  | 0.34388300  | -0.47270100 | H | -4.47603500 | 1.39348600  | 4.80481500  |
| O                   | 3.11716800  | -0.53215200 | -1.24790500 | C | -2.08240700 | 3.18565000  | -0.75683500 |
| H                   | 1.22516700  | 1.49688200  | -2.28726900 | C | -1.32356200 | 4.33393300  | -0.48680000 |
| C                   | 3.44668000  | 2.69799300  | -0.43400000 | C | -3.30154900 | 3.33008700  | -1.44071300 |
| H                   | 3.95866300  | 2.78181100  | -1.39657400 | C | -1.76196200 | 5.59332100  | -0.89976700 |
| H                   | 3.84853200  | 3.48804200  | 0.20853600  | H | -0.38973500 | 4.25279700  | 0.05273000  |
| C                   | 3.35141500  | 1.24475200  | 1.68676900  | C | -3.73684400 | 4.58804700  | -1.85512000 |
| H                   | 3.85862100  | 2.01808100  | 2.27660000  | H | -3.91111700 | 2.46119200  | -1.65887700 |
| H                   | 3.63246600  | 0.27259500  | 2.09444200  | C | -2.96795800 | 5.72326000  | -1.58859900 |
| C                   | 1.93969700  | 2.91570000  | -0.66468600 | H | -1.15855700 | 6.46957800  | -0.68242200 |
| C                   | 1.38522200  | 2.56315000  | -2.05495400 |   |             |             |             |

|                    |             |             |             |    |             |             |             |
|--------------------|-------------|-------------|-------------|----|-------------|-------------|-------------|
| H                  | -4.68042400 | 4.68019000  | -2.38455900 | C  | 7.54156700  | -0.30935900 | -0.20607800 |
| H                  | -3.30893400 | 6.70146500  | -1.91379600 | C  | 6.85010200  | -0.37970600 | 1.00245000  |
| C                  | 0.18498800  | -2.27989500 | -1.29425800 | C  | 5.59312800  | 0.21640500  | 1.13204500  |
| C                  | 0.51349900  | -1.71187900 | -2.52948600 | H  | 5.28066400  | 1.48616800  | -1.99678500 |
| C                  | -0.27957000 | -3.60276100 | -1.24080900 | H  | 7.49342400  | 0.43594800  | -2.23030100 |
| C                  | 0.37443200  | -2.45412900 | -3.70249400 | H  | 8.51807100  | -0.77356800 | -0.30902700 |
| H                  | 0.88298600  | -0.69536200 | -2.56975400 | H  | 7.28399500  | -0.90121600 | 1.85083500  |
| C                  | -0.40527500 | -4.34648300 | -2.41232600 | H  | 5.07718500  | 0.13915700  | 2.08051200  |
| H                  | -0.54381900 | -4.04707400 | -0.28697900 | C  | 3.63216200  | 1.54846000  | 0.18745400  |
| C                  | -0.08263400 | -3.77188600 | -3.64530000 | C  | 2.61111500  | 0.93581500  | -0.82539200 |
| H                  | 0.62130500  | -2.00233100 | -4.65849300 | O  | 2.92963800  | 0.58993100  | -1.94568500 |
| H                  | -0.76134800 | -5.37085800 | -2.36370500 | H  | 1.35117200  | 3.06337500  | -1.73340400 |
| H                  | -0.18768600 | -4.35080800 | -4.55799500 | C  | 3.74978900  | 3.07899900  | -0.09364800 |
| C                  | 1.73064000  | -2.22981100 | 1.14419200  | H  | 4.19498300  | 3.24683300  | -1.07841200 |
| C                  | 2.08806000  | -1.85127500 | 2.44932300  | H  | 4.46830700  | 3.44963300  | 0.64571400  |
| C                  | 2.48569400  | -3.21929200 | 0.50033500  | C  | 2.96745900  | 1.39284700  | 1.55426400  |
| C                  | 3.15889900  | -2.46192400 | 3.10031500  | H  | 3.49756500  | 1.99430900  | 2.30556300  |
| H                  | 1.53106500  | -1.08006400 | 2.96713500  | H  | 3.00516600  | 0.36223700  | 1.88540500  |
| C                  | 3.56640300  | -3.81972400 | 1.14877200  | C  | 2.43741100  | 3.89172800  | 0.01852100  |
| H                  | 2.24456700  | -3.51715600 | -0.51190900 | C  | 1.71806600  | 4.01954200  | -1.33146500 |
| C                  | 3.90574600  | -3.44607400 | 2.44900100  | H  | 2.73277900  | 4.91314400  | 0.28504900  |
| H                  | 3.41306300  | -2.16095700 | 4.11214600  | H  | 0.85987000  | 4.69300800  | -1.25845500 |
| H                  | 4.14299700  | -4.58043200 | 0.63122500  | H  | 2.40023100  | 4.42257800  | -2.08778300 |
| H                  | 4.74596600  | -3.91557800 | 2.95136900  | C  | 1.53381800  | 1.87104500  | 1.42265300  |
| P                  | -1.51120400 | 1.56395500  | -0.08878900 | C  | 1.52447600  | 3.38739400  | 1.16765500  |
| P                  | 0.39745900  | -1.32600300 | 0.25385500  | H  | 0.93319900  | 1.62513500  | 2.30081100  |
| Rh                 | 0.93144200  | 0.92806800  | -0.04377500 | H  | 0.50702300  | 3.76741600  | 1.04077200  |
| H                  | -3.46810600 | -2.27160900 | -3.85737600 | H  | 1.88108000  | 3.82887800  | 2.11097900  |
| H                  | -4.42966000 | -2.27758600 | 3.21921100  | Rh | 0.67399300  | 1.06236200  | -0.26134500 |
| O                  | -3.37841600 | -3.10183500 | -1.27997600 | C  | -2.14317700 | -1.64106300 | 0.61247000  |
| O                  | -4.74429700 | -1.27346600 | 0.71923600  | C  | -0.85611500 | -1.71525700 | 1.18866700  |
| C                  | -3.90053600 | -4.07739700 | -2.17805000 | C  | -0.71525600 | -2.22366400 | 2.49068900  |
| H                  | -3.17488800 | -4.33407100 | -2.95639300 | C  | -1.83008700 | -2.61854400 | 3.22163000  |
| H                  | -4.10608200 | -4.95961300 | -1.57024300 | C  | -2.40984200 | -1.22080400 | -0.79459700 |
| H                  | -4.83058000 | -3.73045500 | -2.64299600 | C  | -2.35834600 | 0.11471100  | -1.22217400 |
| C                  | -5.97093300 | -1.47404100 | 1.41650800  | C  | -2.55162800 | 0.42790400  | -2.57962500 |
| H                  | -6.00376100 | -0.89140100 | 2.34325400  | C  | -2.86813300 | -0.57838900 | -3.48562100 |
| H                  | -6.75530700 | -1.12630900 | 0.74282700  | H  | 0.25795100  | -2.34717300 | 2.93601100  |
| H                  | -6.12982900 | -2.53447900 | 1.64398600  | H  | -1.69997100 | -3.00947900 | 4.22603900  |
|                    |             |             |             | H  | -2.47531100 | 1.45292000  | -2.92119600 |
|                    |             |             |             | H  | -3.02832500 | -0.33217800 | -4.53100700 |
| 10 <sub>L2Rh</sub> |             |             |             | C  | -3.10885600 | -2.52305600 | 2.68187400  |
| C                  | 5.00071600  | 0.89534600  | 0.05931500  | C  | -3.26084800 | -2.04705400 | 1.37790000  |
| C                  | 5.71357900  | 0.96789600  | -1.15007300 | C  | -2.76226400 | -2.22493600 | -1.72743200 |
| C                  | 6.96542300  | 0.36925400  | -1.28313200 |    |             |             |             |

|   |             |             |             |                    |             |             |             |
|---|-------------|-------------|-------------|--------------------|-------------|-------------|-------------|
| C | -2.99377900 | -1.90264600 | -3.06724300 | H                  | 5.31487800  | -3.39584500 | 2.64618100  |
| C | -2.74652300 | 1.17676000  | 1.50809500  | P                  | -1.82233800 | 1.42976900  | -0.05805400 |
| C | -4.14483100 | 1.06992600  | 1.53451300  | P                  | 0.62779100  | -1.13930400 | 0.23999100  |
| C | -2.03237100 | 1.15903000  | 2.71267000  | H                  | -3.24938600 | -2.67258800 | -3.78324700 |
| C | -4.81276900 | 0.93839900  | 2.75005600  | H                  | -3.96842800 | -2.82390000 | 3.26686200  |
| H | -4.71151100 | 1.07126800  | 0.61128000  | O                  | -2.83449400 | -3.48484700 | -1.23265300 |
| C | -2.70316100 | 1.02175700  | 3.92879700  | O                  | -4.46153300 | -1.91859600 | 0.76241000  |
| H | -0.95217900 | 1.23985600  | 2.69718000  | C                  | -3.23786500 | -4.53492800 | -2.10815600 |
| C | -4.09393500 | 0.91035600  | 3.94893800  | H                  | -2.53640600 | -4.65400000 | -2.93997900 |
| H | -5.89520100 | 0.85504700  | 2.76198400  | H                  | -3.23700400 | -5.44218300 | -1.50252100 |
| H | -2.13863400 | 0.99998400  | 4.85612600  | H                  | -4.24646400 | -4.35847600 | -2.49925200 |
| H | -4.61776500 | 0.80365400  | 4.89404300  | C                  | -5.63046900 | -2.33533800 | 1.46369900  |
| C | -2.61188100 | 2.95808200  | -0.71065900 | H                  | -5.76929600 | -1.76190300 | 2.38628400  |
| C | -1.94257700 | 4.17647300  | -0.53812600 | H                  | -6.46504800 | -2.14181700 | 0.78858400  |
| C | -3.89350500 | 2.96413400  | -1.28786400 | H                  | -5.59235100 | -3.40528600 | 1.69810700  |
| C | -2.53122000 | 5.37807500  | -0.93757800 |                    |             |             |             |
| H | -0.96013100 | 4.18936300  | -0.08468000 | 11 <sub>L2Rh</sub> |             |             |             |
| C | -4.47874200 | 4.16335700  | -1.68946700 | C                  | -5.14565500 | 0.82050300  | -0.17484500 |
| H | -4.43110600 | 2.03482600  | -1.43609900 | C                  | -5.89991700 | 0.06768000  | 0.74155600  |
| C | -3.79983000 | 5.37308700  | -1.51668300 | C                  | -7.08049300 | -0.56481500 | 0.35505700  |
| H | -1.99638300 | 6.31244000  | -0.79631700 | C                  | -7.54136900 | -0.45958200 | -0.95914800 |
| H | -5.46850600 | 4.15315700  | -2.13599000 | C                  | -6.80748200 | 0.28851800  | -1.87883600 |
| H | -4.26015100 | 6.30473100  | -1.83133500 | C                  | -5.62344100 | 0.91935300  | -1.49001700 |
| C | 0.48766500  | -2.05457300 | -1.33651000 | H                  | -5.55603900 | -0.03923200 | 1.76255000  |
| C | 0.59565600  | -1.38467500 | -2.56067600 | H                  | -7.64111000 | -1.14261400 | 1.08447800  |
| C | 0.28649300  | -3.44329800 | -1.31471400 | H                  | -8.46126700 | -0.95230600 | -1.25995600 |
| C | 0.50564700  | -2.09839300 | -3.75600700 | H                  | -7.15263600 | 0.38507200  | -2.90435800 |
| H | 0.77048900  | -0.31605100 | -2.58167200 | H                  | -5.07669700 | 1.49010500  | -2.23119500 |
| C | 0.21079000  | -4.15257700 | -2.51063300 | C                  | -3.82795200 | 1.45066800  | 0.24858800  |
| H | 0.19071800  | -3.96517300 | -0.36841200 | C                  | -2.76307700 | 0.33304500  | 0.55754200  |
| C | 0.31711500  | -3.48101800 | -3.73242900 | O                  | -3.09867200 | -0.68387300 | 1.13170100  |
| H | 0.58260100  | -1.57325400 | -4.70302300 | H                  | -1.98011000 | 1.05740300  | 3.15683100  |
| H | 0.06078000  | -5.22741300 | -2.48961700 | C                  | -3.97153600 | 2.26554600  | 1.56511700  |
| H | 0.25194900  | -4.03620300 | -4.66331000 | H                  | -4.41968700 | 1.64325200  | 2.34180100  |
| C | 2.10076000  | -1.88203700 | 1.04400100  | H                  | -4.67558300 | 3.07793100  | 1.35782200  |
| C | 2.38947700  | -1.67639300 | 2.40517700  | C                  | -3.22780300 | 2.39191200  | -0.80624600 |
| C | 3.01808000  | -2.60207100 | 0.26256300  | H                  | -3.91010800 | 3.23054600  | -0.99793400 |
| C | 3.53014000  | -2.23299700 | 2.98071700  | H                  | -3.08824300 | 1.87998000  | -1.76365800 |
| H | 1.74068900  | -1.06212500 | 3.01845300  | C                  | -2.63392200 | 2.85091200  | 2.09307100  |
| C | 4.17009000  | -3.13874600 | 0.83827300  | C                  | -2.10209800 | 2.12793700  | 3.33783400  |
| H | 2.84001400  | -2.74702400 | -0.79548800 | H                  | -2.83033700 | 3.88805000  | 2.40150500  |
| C | 4.42155100  | -2.97078800 | 2.19943300  | H                  | -1.13144500 | 2.53460700  | 3.64249200  |
| H | 3.72854600  | -2.07287500 | 4.03586300  | H                  | -2.80011100 | 2.25120400  | 4.17190600  |
| H | 4.87025900  | -3.68736300 | 0.21634600  | C                  | -1.89505100 | 2.89762000  | -0.32819500 |

|    |             |             |             |                      |             |             |             |
|----|-------------|-------------|-------------|----------------------|-------------|-------------|-------------|
| C  | -1.59790100 | 3.00147200  | 1.00593900  | C                    | -0.58214400 | -1.95117300 | 2.54551400  |
| H  | -1.21613300 | 3.30550200  | -1.07233400 | C                    | 0.31416500  | -3.71993800 | 1.15016300  |
| H  | -0.58429900 | 0.71339500  | 1.53967900  | C                    | -0.46860100 | -2.77786400 | 3.66203400  |
| H  | -0.65477200 | 3.44616100  | 1.30772600  | H                    | -0.97740000 | -0.94940800 | 2.64791200  |
| Rh | -0.86415700 | 0.88657700  | 0.07113600  | C                    | 0.41285700  | -4.54744100 | 2.26770400  |
| C  | 2.47128000  | -1.43785900 | -0.59439400 | H                    | 0.63633800  | -4.08304800 | 0.18029500  |
| C  | 1.21059200  | -1.73275000 | -1.14474200 | C                    | 0.02702200  | -4.07633900 | 3.52497000  |
| C  | 1.11286500  | -2.27047600 | -2.43690400 | H                    | -0.76678300 | -2.40698700 | 4.63792400  |
| C  | 2.26811200  | -2.50578600 | -3.17664600 | H                    | 0.80082600  | -5.55520900 | 2.15725400  |
| C  | 2.61213500  | -0.92693400 | 0.79942900  | H                    | 0.11343800  | -4.71980400 | 4.39537500  |
| C  | 2.25119600  | 0.37713800  | 1.17169200  | C                    | -1.67714200 | -1.99995600 | -1.22506000 |
| C  | 2.23970900  | 0.74106300  | 2.53070500  | C                    | -2.09329800 | -1.20029500 | -2.30334700 |
| C  | 2.65533100  | -0.16782500 | 3.49739800  | C                    | -2.38868900 | -3.16039400 | -0.91331900 |
| H  | 0.14644700  | -2.51274300 | -2.85859900 | C                    | -3.20978800 | -1.55741100 | -3.05584700 |
| H  | 2.19179900  | -2.92604300 | -4.17490800 | H                    | -1.54402300 | -0.29543200 | -2.55379000 |
| H  | 1.91402900  | 1.73045500  | 2.82899300  | C                    | -3.51143900 | -3.51324700 | -1.66636500 |
| H  | 2.65253800  | 0.12003600  | 4.54438600  | H                    | -2.08799500 | -3.77512100 | -0.07260200 |
| C  | 3.52513000  | -2.20415100 | -2.65647900 | C                    | -3.92643300 | -2.71338600 | -2.73126400 |
| C  | 3.62719100  | -1.67221600 | -1.36690600 | H                    | -3.52797100 | -0.93082800 | -3.88330000 |
| C  | 3.05614100  | -1.82835500 | 1.79653000  | H                    | -4.06699400 | -4.41046500 | -1.41104900 |
| C  | 3.08294800  | -1.44699700 | 3.14036900  | H                    | -4.80751600 | -2.98418100 | -3.30463000 |
| C  | 2.46187700  | 1.38198100  | -1.61887900 | P                    | 1.52445500  | 1.54460900  | -0.04852500 |
| C  | 3.85182900  | 1.56421700  | -1.66632900 | P                    | -0.31542400 | -1.35280300 | -0.18750900 |
| C  | 1.75298700  | 1.16622300  | -2.80731900 | H                    | 3.41122500  | -2.13880200 | 3.90533700  |
| C  | 4.52109300  | 1.51110900  | -2.88659500 | H                    | 4.41087200  | -2.38215400 | -3.25270600 |
| H  | 4.40823200  | 1.73990100  | -0.75233900 | O                    | 3.41085700  | -3.05947300 | 1.35385800  |
| C  | 2.42567700  | 1.11305300  | -4.02937700 | O                    | 4.79926800  | -1.32372100 | -0.78214000 |
| H  | 0.67642600  | 1.02535400  | -2.77582900 | C                    | 3.87312700  | -4.01384200 | 2.30681100  |
| C  | 3.81015800  | 1.28271400  | -4.06928700 | H                    | 3.10757700  | -4.23131400 | 3.05830600  |
| H  | 5.59731100  | 1.65124200  | -2.91704100 | H                    | 4.08932200  | -4.91929100 | 1.73820700  |
| H  | 1.86998800  | 0.93531300  | -4.94516100 | H                    | 4.78779100  | -3.66770400 | 2.80177300  |
| H  | 4.33548400  | 1.24142500  | -5.01862700 | C                    | 6.00608300  | -1.53371300 | -1.51202000 |
| C  | 2.11063100  | 3.20725900  | 0.48322500  | H                    | 6.00999800  | -0.96539900 | -2.44813300 |
| C  | 1.42272300  | 4.32975600  | -0.00310400 | H                    | 6.80914600  | -1.17474000 | -0.86694500 |
| C  | 3.27696800  | 3.40507000  | 1.23915300  | H                    | 6.15983400  | -2.59732700 | -1.72755500 |
| C  | 1.87210600  | 5.61988900  | 0.28051000  |                      |             |             |             |
| H  | 0.54076300  | 4.20195500  | -0.62021900 | TS10 <sub>L2Rh</sub> |             |             |             |
| C  | 3.72275500  | 4.69572400  | 1.52468100  | C                    | -5.21640000 | 0.39509900  | -0.39447200 |
| H  | 3.84178500  | 2.55558500  | 1.60411000  | C                    | -6.05617100 | -0.08256200 | 0.62502500  |
| C  | 3.01990200  | 5.80599600  | 1.05225700  | C                    | -7.23383700 | -0.76560600 | 0.32720000  |
| H  | 1.32491100  | 6.47602200  | -0.10242000 | C                    | -7.60228900 | -0.99007700 | -1.00122800 |
| H  | 4.62566100  | 4.83171100  | 2.11241800  | C                    | -6.78003800 | -0.52068200 | -2.02425000 |
| H  | 3.36911100  | 6.80903000  | 1.27762000  | C                    | -5.59928500 | 0.16312900  | -1.72278800 |
| C  | -0.18829000 | -2.41655100 | 1.28539100  | H                    | -5.78577700 | 0.06850300  | 1.66348000  |

|    |             |             |             |   |             |             |             |
|----|-------------|-------------|-------------|---|-------------|-------------|-------------|
| H  | -7.86304400 | -1.12591000 | 1.13598400  | C | 1.53498500  | -3.90071400 | 3.02636000  |
| H  | -8.51928800 | -1.52334700 | -1.23393500 | H | 1.22378800  | -3.98195000 | 0.89847500  |
| H  | -7.05246600 | -0.68349700 | -3.06309400 | C | 0.77750200  | -1.88697500 | 4.13772400  |
| H  | -4.98384400 | 0.51312200  | -2.54271000 | H | -0.15583800 | -0.41189000 | 2.86347300  |
| C  | -3.91603800 | 1.11109600  | -0.04282900 | C | 1.38837000  | -3.14185800 | 4.19093000  |
| C  | -2.94716800 | 0.12405400  | 0.66174000  | H | 2.01289400  | -4.87445100 | 3.06693400  |
| O  | -3.31311200 | -0.88543700 | 1.22004800  | H | 0.67166200  | -1.29235400 | 5.03995000  |
| H  | -2.24606500 | 1.80920400  | 3.02274800  | H | 1.75407700  | -3.52709400 | 5.13792800  |
| C  | -4.17870700 | 2.27499300  | 0.96386300  | C | -1.51290800 | -2.53490900 | -0.39858100 |
| H  | -4.66674900 | 1.88464100  | 1.85955700  | C | -2.29051000 | -2.08048900 | -1.47655400 |
| H  | -4.90015200 | 2.93358900  | 0.47131800  | C | -1.83264000 | -3.75038400 | 0.21214300  |
| C  | -3.20562700 | 1.70781700  | -1.27165300 | C | -3.36452800 | -2.83410800 | -1.94089400 |
| H  | -3.87484500 | 2.43041200  | -1.75750100 | H | -2.06471500 | -1.12153900 | -1.93435600 |
| H  | -2.98219300 | 0.93253700  | -2.00976100 | C | -2.91753500 | -4.50066100 | -0.24902900 |
| C  | -2.92361100 | 3.08842300  | 1.37311500  | H | -1.25643400 | -4.10892400 | 1.05670600  |
| C  | -2.49388800 | 2.85867600  | 2.82900500  | C | -3.68363400 | -4.04665500 | -1.32234000 |
| H  | -3.19873100 | 4.15080000  | 1.30594700  | H | -3.96534300 | -2.46714200 | -2.76673200 |
| H  | -1.61425000 | 3.46259700  | 3.07388800  | H | -3.16482500 | -5.43843500 | 0.23939600  |
| H  | -3.30161900 | 3.14146200  | 3.51168000  | H | -4.53055900 | -4.62882600 | -1.67241600 |
| C  | -1.93054500 | 2.38796400  | -0.86072500 | C | 2.02826500  | 1.55695800  | -1.79487500 |
| C  | -1.78259600 | 2.94749900  | 0.39104000  | C | 1.16269100  | 1.26259300  | -2.85654400 |
| H  | -1.21904400 | 2.63579400  | -1.64514900 | C | 3.37860100  | 1.83544500  | -2.05329200 |
| H  | -1.83777200 | 0.61558000  | 1.45725000  | C | 1.64173000  | 1.24645400  | -4.16667100 |
| H  | -0.93407300 | 3.59163600  | 0.57575600  | H | 0.12334700  | 1.02659600  | -2.65147500 |
| Rh | -0.86376800 | 0.78904100  | 0.23466100  | C | 3.85094000  | 1.82858800  | -3.36422000 |
| C  | 2.90850100  | -0.70284500 | 0.50769800  | H | 4.05603000  | 2.04475600  | -1.23252200 |
| C  | 2.56955900  | 0.60213800  | 0.90804600  | C | 2.98490000  | 1.53136200  | -4.42066100 |
| C  | 3.06203900  | 1.10987400  | 2.12014400  | H | 0.97051000  | 1.00405600  | -4.98484300 |
| C  | 3.86298500  | 0.31700000  | 2.93597300  | H | 4.89579700  | 2.04720200  | -3.56122500 |
| C  | 2.48790200  | -1.29521800 | -0.79543600 | H | 3.35858700  | 1.51749800  | -5.43997400 |
| C  | 1.18324800  | -1.75019100 | -1.05105200 | C | 1.55204000  | 3.30504700  | 0.47763900  |
| C  | 0.87562300  | -2.33827400 | -2.28853700 | C | 1.12782200  | 3.63824700  | 1.77814000  |
| C  | 1.85903700  | -2.46288000 | -3.26475000 | C | 2.01353300  | 4.32353600  | -0.36600700 |
| H  | 2.83859600  | 2.12144300  | 2.42632100  | C | 1.20173300  | 4.95258700  | 2.23255300  |
| H  | 4.23900600  | 0.71864200  | 3.87211100  | H | 0.72088400  | 2.87103500  | 2.42908200  |
| H  | -0.12078600 | -2.70730400 | -2.48824600 | C | 2.07036100  | 5.64405300  | 0.08834800  |
| H  | 1.61514200  | -2.92194100 | -4.21808500 | H | 2.32954100  | 4.09674300  | -1.37697000 |
| C  | 4.19387600  | -0.98446500 | 2.56693500  | C | 1.67298000  | 5.96098000  | 1.38652600  |
| C  | 3.72713600  | -1.48864000 | 1.34981300  | H | 0.87859500  | 5.19110400  | 3.24120800  |
| C  | 3.47032800  | -1.43033400 | -1.80210400 | H | 2.42962700  | 6.42230000  | -0.57810500 |
| C  | 3.15554400  | -2.00858100 | -3.03514100 | H | 1.72235400  | 6.98715700  | 1.73739100  |
| C  | 0.45668100  | -2.14981600 | 1.75079000  | P | -0.15168500 | -1.45422700 | 0.18354100  |
| C  | 1.08039600  | -3.40484900 | 1.80554700  | P | 1.36396800  | 1.57224900  | -0.09713500 |
| C  | 0.30857500  | -1.39236600 | 2.92109100  | H | 3.90784300  | -2.10783200 | -3.80691200 |

|                    |             |             |             |    |             |             |             |
|--------------------|-------------|-------------|-------------|----|-------------|-------------|-------------|
| H                  | 4.81394700  | -1.58971000 | 3.21560300  | Rh | -0.75626000 | 0.68085700  | 0.31391900  |
| O                  | 4.69866700  | -0.94963900 | -1.48828400 | C  | 2.81819500  | -1.09429000 | -0.74673400 |
| O                  | 3.99836300  | -2.73862600 | 0.89954800  | C  | 1.60945700  | -1.58301100 | -1.27528600 |
| C                  | 5.74366100  | -1.08474800 | -2.44865900 | C  | 1.54751800  | -2.05611600 | -2.59187900 |
| H                  | 5.50684100  | -0.55354700 | -3.37668400 | C  | 2.69108300  | -2.02813300 | -3.38608500 |
| H                  | 6.62634500  | -0.63624900 | -1.99087200 | C  | 2.91896300  | -0.68055200 | 0.68519700  |
| H                  | 5.94402400  | -2.13932900 | -2.67011100 | C  | 2.30333200  | 0.47142200  | 1.20274400  |
| C                  | 4.82270800  | -3.58181000 | 1.70029200  | C  | 2.25895900  | 0.68710400  | 2.59317800  |
| H                  | 4.37839400  | -3.75542100 | 2.68603300  | C  | 2.89106800  | -0.20204700 | 3.45386900  |
| H                  | 4.88994400  | -4.52805900 | 1.16178300  | H  | 0.61610400  | -2.43698500 | -2.99295900 |
| H                  | 5.82683700  | -3.15874100 | 1.81899600  | H  | 2.64925200  | -2.39787000 | -4.40615000 |
|                    |             |             |             | H  | 1.72961500  | 1.54170600  | 2.99748300  |
|                    |             |             |             | H  | 2.86394000  | -0.02788400 | 4.52516600  |
| 12 <sub>L2Rh</sub> |             |             |             | C  | 3.89053100  | -1.51594000 | -2.89454500 |
| C                  | -5.58220200 | 0.54126800  | -0.14479800 | C  | 3.95446100  | -1.04771200 | -1.57686200 |
| C                  | -6.51063300 | 0.03335700  | 0.77678600  | C  | 3.55740000  | -1.57095200 | 1.58243000  |
| C                  | -7.79611800 | -0.32838600 | 0.37724800  | C  | 3.55640300  | -1.32328600 | 2.95798400  |
| C                  | -8.18155300 | -0.19614200 | -0.95840200 | C  | 2.03939800  | 1.68575200  | -1.52091700 |
| C                  | -7.26577400 | 0.29697300  | -1.88663000 | C  | 3.34760200  | 2.17178900  | -1.66712500 |
| C                  | -5.97815900 | 0.65924400  | -1.48350100 | C  | 1.27684100  | 1.38865900  | -2.65508000 |
| H                  | -6.23057900 | -0.09124400 | 1.81645000  | C  | 3.89093200  | 2.33142600  | -2.93922200 |
| H                  | -8.49562600 | -0.71767500 | 1.11124800  | H  | 3.93756800  | 2.42056300  | -0.79170400 |
| H                  | -9.18289800 | -0.47735900 | -1.27068000 | C  | 1.82374000  | 1.55369600  | -3.92883100 |
| H                  | -7.54794000 | 0.40216100  | -2.93018600 | H  | 0.26504700  | 1.01702500  | -2.52997300 |
| H                  | -5.28897500 | 1.03501000  | -2.22980900 | C  | 3.13096300  | 2.02091700  | -4.07157300 |
| C                  | -4.16608700 | 0.89996900  | 0.31356600  | H  | 4.90517400  | 2.70305600  | -3.04839500 |
| C                  | -3.43370900 | -0.38525500 | 0.66671700  | H  | 1.23051400  | 1.31313200  | -4.80595000 |
| O                  | -3.89824600 | -1.47291100 | 0.88904800  | H  | 3.55686400  | 2.14801800  | -5.06226500 |
| H                  | -2.12714800 | 0.35285900  | 2.96238300  | C  | 1.62646300  | 3.29308900  | 0.71391100  |
| C                  | -4.20525300 | 1.79444300  | 1.59799300  | C  | 0.87565300  | 4.32210900  | 0.12009800  |
| H                  | -4.75852300 | 1.28710200  | 2.39114300  | C  | 2.66961500  | 3.63415900  | 1.58657700  |
| H                  | -4.79352500 | 2.67049800  | 1.30729500  | C  | 1.13309800  | 5.65703900  | 0.42465800  |
| C                  | -3.37568700 | 1.67895800  | -0.76257000 | H  | 0.10233300  | 4.08519700  | -0.60177900 |
| H                  | -4.02072500 | 2.49942500  | -1.10290700 | C  | 2.92607200  | 4.97364200  | 1.88819700  |
| H                  | -3.18756100 | 1.05037900  | -1.63743000 | H  | 3.29668800  | 2.86662300  | 2.02131600  |
| C                  | -2.84087900 | 2.26454900  | 2.15259800  | C  | 2.15493700  | 5.98648300  | 1.31833800  |
| C                  | -2.29945600 | 1.38243500  | 3.28708700  | H  | 0.53970400  | 6.43803700  | -0.04088600 |
| H                  | -3.03056600 | 3.24826800  | 2.60335000  | H  | 3.73826300  | 5.22103100  | 2.56502100  |
| H                  | -1.34699900 | 1.77447300  | 3.65983800  | H  | 2.35640600  | 7.02632400  | 1.55682700  |
| H                  | -3.00676300 | 1.35725300  | 4.12318500  | C  | 0.38268500  | -2.53283800 | 1.16209200  |
| C                  | -2.07904100 | 2.29290700  | -0.28639400 | C  | -0.09568100 | -2.14386400 | 2.42060100  |
| C                  | -1.81785500 | 2.52353700  | 1.06085700  | C  | 1.08089800  | -3.74174100 | 1.02645000  |
| H                  | -1.53853700 | 2.84464900  | -1.05080200 | C  | 0.11894100  | -2.95608900 | 3.53427900  |
| H                  | -2.30626100 | -0.29303600 | 0.80323400  | H  | -0.61544200 | -1.19629500 | 2.52500400  |
| H                  | -1.02941300 | 3.21608800  | 1.33321000  |    |             |             |             |

|   |             |             |             |
|---|-------------|-------------|-------------|
| C | 1.28649400  | -4.55463500 | 2.14029000  |
| H | 1.47188200  | -4.03776000 | 0.05895700  |
| C | 0.80952700  | -4.16160300 | 3.39443500  |
| H | -0.24468700 | -2.64382300 | 4.50855800  |
| H | 1.82521300  | -5.49079700 | 2.03108000  |
| H | 0.98035400  | -4.79291100 | 4.26119800  |
| C | -1.25342800 | -2.21189500 | -1.23857800 |
| C | -1.89185600 | -1.43032600 | -2.21802000 |
| C | -1.73401900 | -3.49798000 | -0.96596300 |
| C | -2.99229700 | -1.93006500 | -2.91103300 |
| H | -1.52947400 | -0.42907200 | -2.42827500 |
| C | -2.84067300 | -3.99307700 | -1.65938900 |
| H | -1.25989800 | -4.10784200 | -0.20532400 |
| C | -3.47351000 | -3.21158100 | -2.62647800 |
| H | -3.48107300 | -1.31721800 | -3.66235000 |
| H | -3.21139000 | -4.98868300 | -1.43535500 |
| H | -4.33992000 | -3.59631300 | -3.15560900 |
| P | 1.28728500  | 1.57396900  | 0.14771000  |
| P | 0.08879800  | -1.43605900 | -0.26564700 |
| H | 4.03982900  | -2.00808300 | 3.64264200  |
| H | 4.76330100  | -1.48292100 | -3.53417400 |
| O | 4.11603600  | -2.66866700 | 1.01654400  |
| O | 5.06335700  | -0.50356600 | -1.01770200 |
| C | 4.75438900  | -3.61852500 | 1.86754300  |
| H | 4.05446700  | -4.02876500 | 2.60279400  |
| H | 5.10054100  | -4.41782400 | 1.21093100  |
| H | 5.61323900  | -3.17476000 | 2.38399300  |
| C | 6.23107200  | -0.37054100 | -1.82576200 |
| H | 6.03604600  | 0.24836200  | -2.70828800 |
| H | 6.97365200  | 0.12060100  | -1.19546200 |
| H | 6.61230000  | -1.34884900 | -2.14043100 |
